# Supplementary material for: Endocannabinoids and their receptors modulate endometriosis pathogenesis and immune response
Source: bioRxiv preprint, doi:10.1101/2023.10.11.561929, version 2 (2024-04-22)
Supplement: Supplementary Data 4 [file 561929_file04.xlsx]

## Sheet: Normalized data
st_gene_id	gene_id	gene_symbol	fpkm_CA1	fpkm_CA10	fpkm_CA11	fpkm_CA12	fpkm_CA2	fpkm_CA3	fpkm_CA4	fpkm_CA5	fpkm_CA6	fpkm_CA8	fpkm_CA9	fpkm_CB1	fpkm_CB10	fpkm_CB11	fpkm_CB12	fpkm_CB13	fpkm_CB2	fpkm_CB3	fpkm_CB4	fpkm_CB5	fpkm_CB8	fpkm_CB9	fpkm_W1	fpkm_W10	fpkm_W2	fpkm_W3	fpkm_W4	fpkm_W6	fpkm_W8	fpkm_W9	tpm_CA1	tpm_CA10	tpm_CA11	tpm_CA12	tpm_CA2	tpm_CA3	tpm_CA4	tpm_CA5	tpm_CA6	tpm_CA8	tpm_CA9	tpm_CB1	tpm_CB10	tpm_CB11	tpm_CB12	tpm_CB13	tpm_CB2
93688	93688	Klhl1	0	0	0	0.01	0	0.04	0.32	0	0.31	0	0	0	0	0	0.02	0	0	0.02	0	0	0	0	0	0.01	0	0.05	0	0	0.04	0	0	0	0	0.02	0	0.06	0.55	0	0.5	0	0	0	0	0	0.03	0	0
219150	219150	Hmbox1	8.63	9.81	7.76	8.5	7.38	7.92	10.45	8.65	9.74	8.33	9.63	6.99	9.12	10.42	7.51	9.54	7.03	7.18	8.91	12.84	9.31	10.52	9.94	10.76	10.23	11.83	10.8	8.69	8.64	10.08	13.43	16.52	12.19	14.3	11.25	12.67	18.05	13.61	15.57	13.86	16.22	10.69	14.32	16.35	11.32	16.26	10.6
13666	13666	Eif2ak3	5.27	6.58	5.79	7.77	4.37	5.55	5.85	4.95	4.98	7.94	7.94	3.88	5.12	4.59	4.86	5.89	4.58	4.93	4.53	7.87	6.14	6.38	6.97	7.68	5.95	8.88	6.42	7.1	6.67	7.88	8.21	11.08	9.09	13.07	6.67	8.87	10.1	7.79	7.96	13.21	13.38	5.93	8.03	7.2	7.33	10.03	6.9
142688	142688	Asb13	7.45	5.81	7.23	6.37	7.46	7.53	9.59	7.14	8.32	5.15	4.36	7.55	7.52	8.21	12.48	6.42	6.52	5.3	6.73	7.03	7.08	7.91	6.99	6.16	8.19	6.5	7.71	6.61	5.87	6.07	11.59	9.79	11.35	10.71	11.36	12.04	16.57	11.25	13.3	8.57	7.34	11.54	11.81	12.88	18.81	10.94	9.82
52028	52028	Bbs1	1.15	1.39	1.22	1.52	1.32	1.22	2.87	1.25	2.64	1.45	1.13	1.1	1.59	1.5	0.9	1.8	1.17	1.23	1.16	1.48	1.37	1.59	1.64	1.5	1.6	1.73	1.62	1.16	1.51	1.21	1.8	2.34	1.91	2.56	2.01	1.95	4.95	1.97	4.22	2.41	1.9	1.68	2.49	2.35	1.36	3.07	1.77
246293	246293	Klhl8	10.97	8.07	11.13	8.78	13.63	11.42	6.57	10.7	11.19	7.55	5.75	13.47	10.88	11.42	8.67	12.23	11.84	11.58	13.1	3.02	8.56	10.32	9.62	6.13	9.78	2.92	8.67	9.08	10.72	8.53	17.07	13.58	17.48	14.78	20.78	18.26	11.35	16.84	17.89	12.56	9.69	20.6	17.07	17.9	13.07	20.84	17.85
217207	217207	Dhx8	8.61	9.5	7.2	8.18	6.88	7.64	9.36	7.34	7.29	9.12	10.47	5.61	7.77	8.07	6.42	10.24	5.66	6.47	6.91	10.9	7.46	8.91	9.83	10.55	9.46	10.97	9.7	8.05	8.93	9.92	13.39	15.99	11.31	13.75	10.48	12.22	16.18	11.56	11.65	15.17	17.63	8.58	12.19	12.65	9.67	17.44	8.54
67525	67525	Trim62	4.77	2.08	1.46	2.22	2.32	3.23	4.24	4.28	3.98	1.83	2.07	1.84	3.36	3.13	1.66	1.54	1.63	2.26	3.07	5.42	3.15	2.71	3.82	3.44	4.64	4.47	3.31	2.51	2.49	3.4	7.42	3.5	2.29	3.73	3.53	5.17	7.33	6.75	6.36	3.05	3.48	2.82	5.27	4.91	2.5	2.63	2.46
54638	54638	Ccdc22	12.25	9.35	10.99	9.4	11.86	10.53	11.72	12.17	13.2	10.67	13.36	13.72	12.49	11.42	10.25	12.44	12.26	10.66	13.71	16.09	13.09	15	10.93	10.69	11.23	10.14	10.63	11.55	9.43	10.89	19.06	15.74	17.25	15.81	18.07	16.85	20.25	19.16	21.1	17.75	22.49	20.99	19.6	17.9	15.45	21.21	18.49
434215	434215	Lrrc32	14.17	23.29	11.61	13.34	7.63	14.71	23.74	16.78	12.05	19.96	15.8	9.65	13.73	14.18	10.78	9.83	9.62	12.79	11.01	12.89	19.06	12.88	15.03	22.53	17.72	15.86	15.58	14.16	14.93	15.42	22.05	39.21	18.22	22.44	11.62	23.53	41.02	26.42	19.25	33.21	26.6	14.76	21.55	22.23	16.25	16.75	14.5
74376	74376	Myo18b	25.66	42.92	53.08	44.89	49.61	31.94	6.79	35.94	19.72	36.92	18.63	54.47	28.71	26.86	18.36	55.42	46.64	32.55	30.92	0.62	20.57	31.2	34.04	19.78	36.33	5.02	41.94	34.85	28.22	31	39.93	72.26	83.31	75.52	75.6	51.1	11.73	56.59	31.52	61.43	31.37	83.31	45.05	42.12	27.68	94.45	70.32
108888	108888	Atad3a	20.88	15.27	13.92	13.77	15.98	15.13	18.16	15.97	15.99	14.25	19.36	14.19	19.61	19.61	19.3	17.79	13.73	13.16	17.97	21.53	14.66	20.2	23.09	15.9	15.18	19.74	17.23	17.06	14.15	17.79	32.5	25.7	21.85	23.17	24.36	24.2	31.38	25.15	25.56	23.71	32.6	21.71	30.78	30.75	29.1	30.31	20.7
228592	228592	F830045P16Rik	0.07	0.05	0	0.01	0.09	0.02	0	0.02	0.01	0	0.02	0	0	0.07	0	0	0	0.02	0	0.12	0.07	0	0.02	0.12	0.09	0.15	0.04	0	0.01	0.02	0.1	0.08	0	0.02	0.14	0.03	0	0.03	0.01	0	0.04	0	0	0.11	0	0	0
666723	666723	Gm8256	0	0	0	0	0	0	0	0	0	0	0	0.04	0	0	0	0	0	0	0	0	0	0	0	0	0	0	0	0	0	0	0	0	0	0	0	0	0	0	0	0	0	0.07	0	0	0	0	0
17773	17773	Mtnr1a	0	0	0	0	0	0	0	0	0	0	0	0	0	0	0.08	0	0	0.03	0	0	0	0	0	0	0	0	0	0	0	0	0	0	0	0	0	0	0	0	0	0	0	0	0	0	0.13	0	0
12798	12798	Cnn2	171.14	131.93	69.25	81.58	80.18	130.98	203.72	159.68	123.2	102.07	137.73	75.65	152.1	149.42	95.47	66.7	73.29	113.99	107.36	257.56	128.73	113.1	174.02	143.39	111.13	177.57	102.98	118.93	121.23	123.96	266.34	222.1	108.7	137.24	122.2	209.51	351.98	251.42	196.91	169.84	231.95	115.72	238.68	234.31	143.93	113.67	110.49
66271	66271	Tmem126a	46.68	42.47	50.4	42.51	48.24	45.66	33.03	47.61	40.97	36.32	35.42	59.47	45.26	51.71	46.53	44.28	53.16	46.65	54.55	25.52	40.05	35.85	34.92	29.49	42.3	22	38.39	50.51	43.25	37.12	72.64	71.5	79.12	71.51	73.53	73.03	57.07	74.97	65.48	60.43	59.65	90.96	71.02	81.08	70.15	75.46	80.15
66454	66454	Nmnat1	6.39	5.12	5.77	5.35	6.56	5.77	6.78	5.73	5.35	5.28	4.53	6.28	5.71	6.32	7.13	5.03	5.93	5.25	6.12	4.24	5.1	5.1	5.7	4.48	6.61	3.81	6.34	6.59	5.71	4.67	9.95	8.63	9.05	9	10	9.24	11.71	9.02	8.54	8.78	7.63	9.61	8.96	9.91	10.75	8.58	8.94
17145	17145	Mageb1	0	0	0	0	0	0	0	0	0	0	0	0	0.02	0	0	0	0	0	0	0	0	0	0	0	0	0	0	0	0	0.02	0	0	0	0	0	0	0	0	0	0	0	0	0.02	0	0	0	0
16590	16590	Kit	3.57	13.81	3.5	5.79	2.85	5.24	24.83	6.29	22.42	3.54	5.28	3.33	4.58	6.04	4.52	3.05	2.81	5.67	3.81	6.79	5.25	4.99	4.61	7.19	3.47	7.81	4.01	5.18	8.79	6.4	5.56	23.24	5.49	9.74	4.35	8.38	42.9	9.9	35.84	5.88	8.9	5.09	7.19	9.48	6.82	5.2	4.23
56554	56554	Raet1d	1.27	2.91	3.47	4.49	1.64	2.02	3.18	2.85	2.04	6.52	6.18	2.02	2.4	1.92	9.89	2.17	1.67	3.25	1.71	2.72	4.32	2.44	3.04	3.66	2.57	3.07	2.7	3.64	4.39	3.67	1.98	4.91	5.45	7.55	2.51	3.23	5.49	4.48	3.26	10.84	10.42	3.08	3.77	3.02	14.9	3.7	2.52
213452	213452	Dstyk	7.98	9.02	7.33	8.43	6.93	7.28	10.12	8.23	9.01	7.85	8.72	7.48	8.46	7.42	5.99	9.93	7.31	7.21	8.4	10.38	9.63	10.03	9.34	9.81	9.71	9.43	9.07	7.58	8.06	8.53	12.42	15.18	11.5	14.18	10.56	11.64	17.49	12.97	14.4	13.07	14.68	11.45	13.28	11.64	9.03	16.92	11.02
19092	19092	Prkg2	0.5	1.47	0.84	1.62	0.36	0.63	0.75	0.6	0.5	1.09	2.1	0.52	0.76	0.79	0.31	0.87	0.69	0.72	0.44	1.18	0.61	0.72	0.46	1.02	0.66	1.05	0.93	1	1.18	1.61	0.78	2.48	1.32	2.73	0.55	1.01	1.29	0.95	0.8	1.82	3.54	0.79	1.19	1.23	0.47	1.49	1.03
229898	229898	Gbp5	2.46	1.79	4.19	4.51	2.37	2.94	4.23	2.19	3.57	4.5	5.81	2.78	3.21	3.12	2.54	2.56	2.07	2.34	2.06	4.04	3.05	3.21	2.75	3.22	2.85	4.53	3.67	3.46	3.04	2.48	3.83	3.02	6.57	7.59	3.61	4.71	7.31	3.45	5.71	7.48	9.78	4.26	5.04	4.89	3.83	4.36	3.12
72946	72946	Lrrc47	20.31	17.82	15.27	17.23	16.77	17.62	18.45	17.82	17.4	18.91	19.96	15.31	15.99	17.1	13.91	21.32	15.58	16.7	15.92	22.24	16.81	21.33	18.22	17.51	18.71	20.43	18.49	18.49	17.5	20.38	31.61	30	23.97	28.98	25.55	28.19	31.88	28.06	27.81	31.46	33.62	23.42	25.09	26.81	20.96	36.34	23.49
19720	19720	Trim27	24.03	19.04	18.26	20.14	21.5	20.22	20.04	23.13	19.85	20.73	25.71	17.97	22.99	21.82	16	20.28	18.29	19.01	20.59	30.64	21.96	23.92	22.63	19.52	19.04	28.79	20.43	21.71	18.31	22.72	37.4	32.06	28.66	33.88	32.77	32.34	34.63	36.42	31.72	34.49	43.3	27.49	36.08	34.21	24.12	34.55	27.57
66212	66212	Sec61b	237.17	232.68	221.35	236.18	220.52	232.74	248.34	229.32	252.84	263.56	303.03	186.91	280.52	231	246.27	149.05	207.56	262.42	239.73	396.64	303.78	304.39	292.82	246.52	189.5	298.48	217.95	293.78	249.61	293.89	369.09	391.72	347.44	397.32	336.1	372.27	429.08	361.07	404.12	438.56	510.33	285.88	440.19	362.22	371.28	254	312.91
433070	433070	Vmn2r96	0.02	0	0.02	0.03	0	0	0	0	0	0.02	0	0.02	0.02	0	0.02	0	0.02	0.04	0	0.02	0.02	0	0.02	0	0.02	0	0	0.01	0	0	0.03	0	0.03	0.06	0	0	0	0	0	0.03	0	0.03	0.03	0	0.03	0	0.03
238276	238276	Akap5	0.38	0.23	0.31	0.2	0.17	0.57	0.67	0.24	0.58	0.48	0.37	0.18	0.24	0.14	0.24	0.39	0.18	0.4	0.09	0.34	0.28	0.27	0.15	0.42	0.21	0.65	0.35	0.19	0.34	0.41	0.59	0.39	0.49	0.34	0.26	0.92	1.16	0.37	0.92	0.8	0.62	0.28	0.38	0.21	0.36	0.67	0.27
27084	27084	Xlr5c	0	0	0	0	0	0	0	0	0	0	0	0	0	0	0	0.05	0	0	0	0	0	0	0.05	0	0	0	0	0	0	0	0	0	0	0	0	0	0	0	0	0	0	0	0	0	0	0.08	0
93670	93670	Tac4	0.76	5.34	1.49	0.62	5.32	1.49	0.27	0.34	0.34	1.03	0.33	1.62	2.08	0.48	0.42	6.09	2.49	0.41	1.65	0	1.77	5.14	1.65	0.61	1.01	0.6	0.82	0.55	0.9	0.83	1.18	9	2.34	1.05	8.11	2.39	0.46	0.53	0.55	1.71	0.56	2.47	3.26	0.75	0.64	10.38	3.75
73230	73230	Bmper	2.41	9.22	8.87	12.89	6.02	7.48	5.53	2.47	3.62	13.44	22.42	2.9	2.99	2.46	2.98	8.3	6.02	6.93	2.24	3.5	4.34	4.89	4.25	14.27	5.93	7.27	9.49	14.34	8.79	9.01	3.76	15.52	13.93	21.69	9.17	11.97	9.55	3.89	5.79	22.36	37.75	4.43	4.7	3.86	4.5	14.15	9.08
22305	22305	Vmn2r37	0	0	0.01	0	0	0	0	0	0	0	0	0	0	0	0	0	0	0	0	0	0	0	0	0	0	0	0	0	0	0	0	0	0.02	0	0	0	0	0	0	0	0	0	0	0	0	0	0
57390	57390	Psors1c2	0.39	0.39	0.26	0.25	0.4	0.06	0.61	0.44	0.51	0.06	0.25	0.27	0.33	0.13	0.46	0.27	0.39	0.25	0.48	0.65	0.27	0.41	0.53	0.32	0.38	0.65	0.25	0.25	0.32	0.12	0.6	0.66	0.41	0.42	0.61	0.1	1.05	0.7	0.81	0.1	0.42	0.41	0.52	0.21	0.69	0.46	0.59
74477	74477	4933427D14Rik	3.63	3.3	2.69	2.96	2.71	2.92	4.52	3.59	4	2.85	3.41	2.64	3.8	4.14	2.56	3.12	2.2	2.49	3.46	5.78	4.05	4	4.4	4.11	3.74	5.1	3.25	3.15	2.6	3.82	5.64	5.55	4.22	4.98	4.13	4.66	7.82	5.65	6.39	4.74	5.74	4.04	5.97	6.5	3.86	5.32	3.32
14729	14729	Gp5	0.04	0.06	0.06	0.11	0.16	0.07	0.02	0.13	0.02	0.02	0.11	0.08	0.08	0.22	0.06	0.32	0.16	0.04	0.14	0.14	0.1	0.27	0.04	0	0.02	0.12	0.08	0.11	0.06	0.07	0.06	0.1	0.09	0.19	0.25	0.12	0.04	0.21	0.04	0.03	0.19	0.12	0.13	0.35	0.09	0.55	0.24
66586	66586	Crls1	9.71	9.4	10.01	9.88	11.05	11.59	11.22	9.5	11.56	9.51	9.67	10.07	10.35	10.53	13.36	12.81	10.14	9.13	11.07	12.79	9.24	12.21	11.4	9.5	8.29	11.09	8.53	11.21	9.91	10.2	15.11	15.82	15.71	16.63	16.85	18.53	19.39	14.95	18.48	15.82	16.29	15.41	16.24	16.52	20.15	21.82	15.28
16410	16410	Itgav	14.97	22.7	13.92	17.24	11.99	14.11	19.71	17.07	13.67	20.03	29.39	10.2	13.43	16.23	12.02	12.54	11.84	14.43	11.4	26.46	17.46	13.91	14.27	21.18	15.97	25.72	15.29	15.82	19.89	16.73	23.3	38.21	21.85	29.01	18.27	22.57	34.05	26.87	21.86	33.34	49.5	15.6	21.07	25.45	18.13	21.36	17.85
224530	224530	Acat3	0.91	1.14	0.81	0.86	0.54	0.53	1.23	0.6	0.59	0.88	1.35	0.53	0.99	1.38	68.29	1.01	0.65	1.09	0.51	1.34	1.19	1.34	0.72	1.21	0.55	0.92	0.75	1.11	0.93	0.69	1.41	1.93	1.28	1.45	0.82	0.84	2.12	0.94	0.94	1.46	2.28	0.8	1.56	2.17	102.96	1.72	0.98
16622	16622	Klk1b5	0	0	0	0	0	0	0	0	0	0	0	0	0	0	0	0	0	0	0	0	0	0.07	0	0	0	0	0	0	0.06	0	0	0	0	0	0	0	0	0	0	0	0	0	0	0	0	0	0
11648	11648	Akp3	0	0	0	0	0	0	0	0	0	0	0	0	0	0	0	0	0	0	0	0	0	0.02	0.03	0	0	0	0	0	0	0.02	0	0	0	0	0	0	0	0	0	0	0	0	0	0	0	0	0
239083	239083	Ccnb1ip1	0	0	0	0	0	0	0.04	0	0	0	0	0	0	0	0	0	0	0	0	0.06	0	0	0.03	0	0	0.03	0	0	0	0	0	0	0	0	0	0	0.06	0	0	0	0	0	0	0	0	0	0
108168499	108168499	Gm46696	0.81	1.21	0.56	0.33	0.39	1.09	0.56	0.83	0.5	0.85	0.72	0.3	0.33	0.98	0.71	0.35	0.39	0.65	0.31	0.86	0.93	0.36	1.14	1.7	1.79	1.68	1.82	0.23	0.84	1.21	1.26	2.03	0.88	0.55	0.59	1.74	0.97	1.31	0.8	1.42	1.22	0.46	0.52	1.54	1.06	0.6	0.59
100043235	100043235	Gm4305	0	0	0	0	0	0.02	0.02	0	0	0	0	0	0	0	0	0	0	0	0	0	0	0	0	0	0	0.02	0.02	0	0	0	0	0	0	0	0	0.03	0.04	0	0	0	0	0	0	0	0	0	0
100043772	100043772	Zfp850	0.41	0.58	0.31	0.48	0.25	0.28	0.63	0.56	0.46	0.54	0.7	0.37	0.6	0.52	0.35	0.39	0.28	0.35	0.44	0.85	0.4	0.45	0.7	0.68	0.48	0.69	0.69	0.48	0.35	0.71	0.64	0.97	0.48	0.8	0.38	0.45	1.09	0.88	0.74	0.9	1.18	0.56	0.94	0.81	0.53	0.67	0.43
101055745	101055745	Gm29721	0	0	0	0	0	0.04	0	0	0	0	0	0	0	0	0	0	0	0	0	0	0	0	0	0.14	0.23	0.07	0	0.18	0.04	0.09	0	0	0	0	0	0.06	0	0	0	0	0	0	0	0	0	0	0
626848	626848	Zfp971	9.88	10.36	10.3	8.56	7.47	9.48	12.51	9.71	9.81	10	11.13	9.87	9.96	10.43	9.93	9.19	10.33	9.82	10.04	9.29	13.34	9.55	12.25	13.26	12.45	9.49	13.16	8.79	10.2	11.41	15.37	17.44	16.17	14.4	11.38	15.16	21.62	15.28	15.68	16.64	18.75	15.09	15.64	16.36	14.97	15.66	15.57
15874	15874	Iapp	0	0.09	0	0	0	0	0	0	0	0	0	0	0	0	0	0	0	0	0	0	0	0	0	0	0	0	0	0	0	0	0	0.15	0	0	0	0	0	0	0	0	0	0	0	0	0	0	0
52055	52055	Rab11fip5	22.43	21.32	20.16	24.63	20.09	20.72	20.5	22.22	19.91	29.21	24.77	19.18	20.57	19.63	13.3	25.87	20.09	21.32	20.95	33.47	23.76	25.94	19.66	26.89	25.12	24.88	24.44	26.12	21.98	23.1	34.91	35.9	31.64	41.43	30.62	33.15	35.41	34.99	31.82	48.6	41.72	29.34	32.28	30.79	20.06	44.09	30.28
18647	18647	Cdk14	5.95	6.23	4.91	6.41	5.13	5.75	5.61	6.37	4.44	7.09	9.72	3.66	3.85	4.71	3.34	6.76	3.89	5.56	4.43	11.91	6.33	6.78	5.31	8.53	6.41	9.04	6.42	5.07	5.26	5.71	9.26	10.5	7.71	10.79	7.83	9.19	9.69	10.04	7.09	11.8	16.37	5.6	6.05	7.39	5.03	11.51	5.87
72486	72486	Rnf219	4.23	3.32	2.48	3.35	2.85	3.64	4.56	3.86	3.46	3.71	4.32	2.58	3.51	3.93	2.59	3.46	2.92	3.45	3.66	5.87	3.8	3.43	5.3	4.31	3.77	4.73	4.56	3.26	3.13	4.63	6.58	5.6	3.9	5.63	4.35	5.83	7.88	6.08	5.53	6.18	7.28	3.94	5.5	6.16	3.91	5.9	4.4
242286	242286	Sdr16c6	0.04	0	0	0	0.18	0.04	0	0.08	0	0	0	0	0	0	0.02	0	0	0	0	0.06	0	0	0	0	0	0.02	0	0	0	0	0.06	0	0	0	0.27	0.06	0	0.13	0	0	0	0	0	0	0.03	0	0
20962	20962	Sycp3	0.04	0.13	0	0	0.09	0.08	0.21	0	0.15	0.08	0.17	0	0.05	0.14	0.18	0.05	0.04	0.13	0.05	0.27	0.05	0.33	0.04	0.09	0.09	0.04	0.09	0	0.09	0.12	0.07	0.22	0	0	0.14	0.13	0.35	0	0.24	0.14	0.29	0	0.07	0.21	0.27	0.08	0.07
99982	99982	Kdm1a	28.67	25.01	20.28	21.85	25.1	23.97	24.68	26.29	23.16	22.19	23.33	17.53	22.62	25.4	17.21	26.48	20.57	22.2	23.28	41.95	25.51	31.31	21.93	25.01	22.12	35.61	21.88	22.66	20.41	26.21	44.61	42.1	31.83	36.75	38.26	38.34	42.65	41.4	37.02	36.93	39.3	26.81	35.5	39.83	25.95	45.12	31.01
27275	27275	Nufip1	12.27	9.51	10.07	11.02	10.51	11.02	11.28	10.7	12.22	9.95	13	10.83	12.08	10.59	8.37	10.41	10.54	10.13	12.4	15	12.39	13.02	12.17	11.46	11.08	12.65	9.69	12.7	10.61	11.75	19.1	16.01	15.81	18.54	16.02	17.63	19.48	16.85	19.53	16.56	21.89	16.56	18.95	16.61	12.62	17.75	15.9
231050	231050	Galnt11	10.44	14.13	9.16	11.76	8.33	9.9	15.27	9	11.5	10.88	10.04	8.65	9.43	10.86	8.17	12.34	9.05	9.34	9.61	10.73	9.64	11.01	11.37	11.25	11.02	11.84	11.48	11.73	12.11	11.52	16.25	23.79	14.38	19.78	12.69	15.83	26.39	14.18	18.39	18.11	16.91	13.23	14.8	17.03	12.32	21.02	13.64
626391	626391	Zfp951	0.66	0.51	0.46	0.82	0.61	0.61	1.12	0.57	0.62	0.53	1.09	0.78	1.2	1.48	0.91	1.17	0.96	0.72	1.18	2.17	1.38	1.07	0.6	1.05	0.73	0.73	0.74	0.73	0.64	0.83	1.03	0.86	0.72	1.38	0.92	0.98	1.94	0.9	1	0.89	1.84	1.2	1.89	2.32	1.37	2	1.45
245305	245305	B230307C23Rik	5.79	3.94	4.03	4.39	3.86	5.03	4.3	5.01	4.34	5	5.14	3.67	4.78	4.36	4.6	2.85	4.81	4.69	4.52	6.46	5.46	4.46	5.46	5.2	4.7	5.87	4.15	3.58	4.49	5.04	9.02	6.63	6.33	7.38	5.88	8.04	7.42	7.89	6.94	8.31	8.66	5.61	7.5	6.83	6.94	4.86	7.25
235132	235132	Zbtb44	5.25	4.92	4.7	4.36	4.67	4.51	5.51	5.99	6.17	3.65	4.23	5.42	5.58	6.28	5.17	5.2	5.46	5.22	6.43	4.61	5	5.06	4.58	4.5	4.97	4.36	4.14	4.29	4.39	4.11	8.18	8.29	7.38	7.33	7.11	7.22	9.52	9.43	9.86	6.08	7.13	8.29	8.76	9.85	7.8	8.87	8.22
54201	54201	Zfp316	2.58	1.85	1.72	2.04	2.46	2.32	2.98	2.38	2.92	1.96	2.09	1.84	2.42	2.06	1.89	2.63	1.94	2.02	2.16	2.91	2.44	2.72	2.25	2.22	2.56	2.62	2.21	2.09	2.01	2.3	4.02	3.12	2.69	3.43	3.76	3.71	5.15	3.74	4.67	3.26	3.52	2.81	3.79	3.23	2.85	4.48	2.92
382252	382252	Bclaf3	2.48	2.56	1.7	2.34	1.82	1.98	2.89	2.3	2.1	1.69	2.67	1.87	2.48	2.7	1.75	2.03	1.7	1.72	2.45	3.39	2.76	2.72	2.52	2.63	2.72	3.16	2.48	1.84	2.43	2.15	3.86	4.31	2.67	3.93	2.77	3.16	4.99	3.61	3.35	2.81	4.5	2.86	3.89	4.24	2.63	3.46	2.57
238393	238393	Serpina3f	0.92	0.39	0.26	0.75	0.26	0.47	0.91	0.65	0.37	0.67	1.23	0.34	0.34	0.45	1.09	0.5	0.14	0.43	0.49	1.19	0.52	0.51	0.21	1.42	0.67	1.24	0.35	0.75	0.5	0.56	1.43	0.65	0.4	1.25	0.39	0.76	1.57	1.02	0.59	1.11	2.08	0.52	0.54	0.7	1.64	0.85	0.21
11798	11798	Xiap	9.83	14.18	9.51	11.52	7.78	9.48	14.2	11.11	10.72	10.86	14.08	8.93	12.04	12.87	13.07	10.2	8.89	10.3	11.07	14.21	13.49	10.56	14.23	15.67	12.21	14.14	13.4	10.3	12.26	13.45	15.3	23.87	14.92	19.39	11.86	15.16	24.53	17.49	17.14	18.07	23.71	13.67	18.9	20.18	19.7	17.39	13.4
230753	230753	Thrap3	53.57	45.7	38.86	42.35	40.68	42.81	51.33	47.62	41.26	44.51	53.92	31.82	42.86	46.1	35.44	47.44	35.56	36.74	39.85	61.52	43.5	50.37	59.02	54.06	49.24	61.36	50.09	42.49	45.52	49.46	83.37	76.94	61	71.25	62	68.48	88.68	74.97	65.94	74.06	90.81	48.67	67.25	72.28	53.43	80.84	53.6
20873	20873	Plk4	2.21	3.56	2.77	3.72	1.37	2.22	2.83	2.84	2.16	3.57	5.35	1.37	3.34	3.39	1.77	2.45	1.59	2.63	2.73	4.14	3.68	3.03	5.31	3.92	2.55	3.02	3.71	3.26	2.95	3.7	3.43	5.99	4.34	6.26	2.09	3.55	4.88	4.47	3.46	5.95	9.02	2.09	5.23	5.31	2.66	4.17	2.39
109254	109254	Adtrp	0.33	0.04	0.08	0.1	0.16	0.15	0.12	0.12	0.04	0	0.08	0.05	0.05	0.11	16.46	0	0.04	0.07	0.11	0.42	0.11	0.09	0.24	0.07	0.12	0.36	0.03	0.15	0.02	0.22	0.52	0.06	0.13	0.17	0.25	0.24	0.21	0.19	0.06	0	0.13	0.08	0.08	0.17	24.82	0	0.05
70549	70549	Tln2	13.17	15.37	16.64	14.1	15.88	15.14	8.78	12.88	13.81	12.24	17.49	17.7	13.68	14.25	9.17	11.85	14.33	15.01	13.56	4.33	12.05	8.03	11.76	12.61	15.35	6.88	13.47	10.62	14.17	12.55	20.5	25.88	26.12	23.72	24.21	24.22	15.17	20.29	22.07	20.37	29.46	27.07	21.47	22.34	13.82	20.19	21.6
383619	383619	Aim2	2.78	2.43	2.74	3.28	1.89	2.09	2.81	2.44	2.41	2.77	4.29	3.8	5.06	2.75	2.88	2.44	2.63	4.04	4.63	4.49	5.05	3.18	3.28	5.34	3.72	3.25	3.35	3.16	2.73	3.75	4.33	4.1	4.3	5.52	2.88	3.34	4.85	3.85	3.85	4.61	7.23	5.82	7.95	4.31	4.35	4.15	3.97
216971	216971	Fam222b	5.17	5.68	4.71	4.59	4.22	5.16	5.8	5.12	5.41	5.63	6.24	4.27	5.26	5.2	4.58	5.19	3.84	5.17	4.99	7.07	5.64	5.17	5	5.86	4.95	7.27	4.87	4.55	5.41	5.24	8.05	9.56	7.39	7.71	6.43	8.25	10.03	8.07	8.65	9.36	10.51	6.53	8.25	8.16	6.9	8.85	5.78
66241	66241	Tmem9	44.59	37.66	28.44	31.33	38.46	42.83	36.85	44.88	37.63	35.23	30.86	30.3	37.95	42.31	30.81	71.01	41.68	33.3	37.67	60.71	39.92	63.65	35.8	32.26	37.95	39.04	33.9	35.64	29.42	39.92	69.39	63.41	44.64	52.7	58.62	68.5	63.67	70.66	60.14	58.63	51.97	46.34	59.55	66.35	46.44	121.01	62.84
105246618	105246618	Gm41885	6.77	2.29	2.1	3.15	14.79	4.76	4.1	4.27	5.64	2.83	4	3.32	4.08	10.01	2.72	1.36	1.86	4.56	3.36	5.67	6.12	4.06	66.42	24.01	31.03	123.03	40.85	16.59	13.05	16.07	10.54	3.85	3.29	5.29	22.54	7.61	7.09	6.72	9.02	4.71	6.74	5.08	6.41	15.69	4.1	2.32	2.81
72948	72948	Tppp	4.14	1.74	2.46	2.42	1.26	3.59	10.56	1.84	8.18	4.99	1.27	1.49	3.21	2.38	3.83	0.77	1.59	3.06	2.41	0.62	1.41	1.1	1.96	4.32	4.75	2.03	2.76	2.4	7.29	2.18	6.44	2.93	3.87	4.07	1.91	5.75	18.24	2.9	13.07	8.3	2.15	2.27	5.04	3.74	5.77	1.32	2.4
21881	21881	Tkt	53.2	41.85	31.06	36.68	33.41	40.81	49.69	47.58	41.96	43.13	67.05	41.88	63.99	54.15	50.12	26.51	38.66	59.57	54.54	88.06	62.63	48.93	69.43	61.47	49.04	70.1	55.67	51.46	41.45	62.9	82.8	70.46	48.76	61.7	50.92	65.28	85.85	74.91	67.07	71.76	112.91	64.05	100.41	84.9	75.56	45.18	58.28
381399	381399	Bpifb4	0	0	0	0.04	0.04	0	0	0	0	0	0	0	0	0	0	0	0	0	0	0.06	0.02	0	0	0.02	0	0.06	0	0	0	0	0	0	0	0.07	0.06	0	0	0	0	0	0	0	0	0	0	0	0
257632	257632	Nod2	1.24	0.78	1.09	1.18	1.2	0.96	0.91	1.05	1.05	1.27	1.1	0.97	1.03	1.14	0.64	1.91	0.85	0.95	0.91	1.32	1.26	1.67	0.94	1.44	1	2.42	1.03	0.97	0.89	1	1.93	1.31	1.71	1.99	1.82	1.54	1.56	1.65	1.68	2.12	1.85	1.49	1.62	1.79	0.96	3.25	1.28
66230	66230	Mrps28	66.49	49.08	65.6	55.43	69.39	69.15	55.45	66.35	72.99	54.29	51.1	77.43	68.01	69.43	60.69	56.67	79.39	67.28	79.75	41.92	68.55	58.38	58.11	39.29	55.34	32.34	52.73	61.45	58.34	51.09	103.48	82.63	102.97	93.26	105.76	110.61	95.8	104.48	116.67	90.34	86.05	118.44	106.73	108.87	91.49	96.57	119.69
11651	11651	Akt1	92.37	104.06	81.24	93.46	73.29	82.79	107.1	89.32	86.65	104.57	118.24	69.09	91.97	92.22	69.97	115.99	68.37	84.26	78	132.01	93.99	111.21	105.78	111.65	85.47	111.76	93.81	98.47	92.07	103.45	143.75	175.18	127.53	157.23	111.7	132.43	185.05	140.65	138.5	174.01	199.13	105.68	144.33	144.61	105.49	197.66	103.07
19727	19727	Rfxank	5.01	4.53	3.83	4.42	5.06	4.99	6.49	4.96	5.48	4.09	4.36	4.74	4.95	5.21	5.06	5.47	3.94	4.16	4.42	5.88	5.63	5.79	5.05	4.78	5	5.84	4.89	4.28	4.29	4.51	7.79	7.63	6.02	7.44	7.71	7.98	11.21	7.82	8.76	6.8	7.34	7.25	7.77	8.17	7.64	9.32	5.94
192156	192156	Mvd	14.18	8.94	11.12	8.84	15.86	10.11	11.79	10.67	12.62	10.15	8.92	14.89	12.82	11.96	13.64	10.62	13.25	12.34	13	14.86	12.71	14.05	12.16	10.46	12.53	19.02	11.07	12.16	9.42	12.17	22.07	15.05	17.45	14.87	24.18	16.16	20.38	16.81	20.17	16.9	15.03	22.77	20.12	18.75	20.57	18.11	19.98
74011	74011	Slc25a27	4.87	3.43	3.27	2.8	5.05	3.67	4.91	4.37	4.86	2.16	1.85	4.39	3.58	4.64	2.58	3.98	3.57	2.4	4.62	4.65	4.45	4.83	2.48	2.79	4.39	3.37	3.16	2.36	2.34	2.14	7.57	5.78	5.14	4.71	7.69	5.87	8.48	6.88	7.77	3.59	3.12	6.72	5.62	7.27	3.89	6.78	5.38
432555	432555	Gm5431	0.62	0.65	1.26	1.55	1.15	0.89	0.61	0.8	0.37	1.37	1.96	0.71	0.92	0.82	0.82	0.84	0.75	0.94	0.78	1.22	0.95	0.9	0.83	1.31	0.95	2.57	1.2	1.4	0.72	0.9	0.96	1.1	1.97	2.61	1.75	1.42	1.05	1.26	0.59	2.27	3.31	1.08	1.44	1.29	1.23	1.43	1.13
64051	64051	Sv2a	1.47	0.96	0.81	0.81	0.97	2.01	6.41	1.62	6.79	2.26	0.91	0.49	1.36	1.75	1.44	0.53	0.66	1.49	1.18	1.46	1.2	0.98	2.39	1.35	1.78	1.93	1.23	1.14	1.44	1.2	2.29	1.61	1.26	1.36	1.48	3.22	11.08	2.56	10.85	3.76	1.53	0.75	2.13	2.74	2.17	0.9	0.99
27274	27274	Zfp354b	0.83	0.75	0.7	0.68	0.74	0.96	0.89	0.89	0.92	0.42	0.37	0.72	0.73	0.87	0.76	1.05	0.74	0.63	0.82	0.44	0.73	0.9	0.73	0.8	0.66	0.69	0.77	0.67	0.6	0.59	1.3	1.26	1.11	1.14	1.12	1.54	1.54	1.4	1.48	0.7	0.62	1.1	1.14	1.37	1.14	1.79	1.12
78076	78076	Lcn8	0	0	0	0	0	0	0	0.09	0	0.09	0	0	0	0	0	0.1	0.19	0	0	0	0	0	0	0	0	0	0	0	0.19	0	0	0	0	0	0	0	0	0.15	0	0.16	0	0	0	0	0	0.17	0.29
115489970	115489970	LOC115489970	0	0	0	0	0	0	0	0	0.12	0	0	0	0	0	0	0	0	0	0	0	0	0	0	0	0	0	0	0	0	0	0	0	0	0	0	0	0	0	0.19	0	0	0	0	0	0	0	0
327987	327987	Med13	5.92	6.65	6.17	6.53	5.82	5.81	6.36	6.63	5.58	5.91	6.28	5.69	5.77	6.4	4.95	8.36	6.53	5.37	5.92	6.83	6.48	7.27	7.01	7.99	7.33	7.26	8.01	5.02	6.32	6.88	9.22	11.2	9.68	10.99	8.86	9.3	11	10.44	8.92	9.84	10.57	8.71	9.05	10.04	7.46	14.25	9.84
239691	239691	AU021092	6.5	3.99	3.26	2.98	3.57	5.35	5.47	8.26	8.06	3.72	4.43	4.4	7.06	9.85	4.41	2.49	2.59	4.26	6.29	10.52	6.27	9.96	7.54	6.83	4.88	8.91	5.74	5.58	4.93	7.31	10.11	6.72	5.12	5.02	5.43	8.56	9.46	13	12.87	6.2	7.47	6.73	11.08	15.44	6.65	4.24	3.91
19165	19165	Psen2	14.31	15.45	14.41	15.07	14.68	16.18	16.21	14.61	15.6	19.79	19.01	17.46	17.23	16.49	52.06	21.48	15.99	18.8	17.06	20.23	20.12	20.47	16.69	20.59	18.1	16.69	19.25	19.07	14.44	19.17	22.27	26.01	22.61	25.35	22.37	25.89	28.02	23	24.93	32.93	32.02	26.7	27.03	25.86	78.49	36.6	24.11
71367	71367	Chst9	0.21	0	0	0	0.03	0.08	0.06	0.09	0.06	0	0	0.03	0.1	0.17	0	0	0.12	0.02	0.08	0.38	0.03	0	0.08	0.03	0.11	0.08	0.07	0	0	0.04	0.32	0	0	0	0.04	0.12	0.11	0.14	0.1	0	0	0.04	0.15	0.27	0	0	0.18
14419	14419	Gal	0.28	1.8	2.16	4.27	0.74	20.55	110.53	1.54	64.37	1.67	1.66	0.96	0.88	0.22	12.24	3.26	2.28	18.72	1.13	0.93	1.66	2.65	0.51	15.65	0.9	17.16	1.4	2	19.74	1.08	0.44	3.02	3.4	7.19	1.13	32.86	190.98	2.42	102.88	2.77	2.8	1.46	1.39	0.35	18.45	5.55	3.44
12028	12028	Bax	90.84	96.68	79.78	89.5	69.7	79.12	101.83	88.88	92.95	92.51	116.57	78.29	100.91	95.53	73.9	83.72	72.93	93.97	94.93	139.1	113.05	118.03	107.22	105.65	86.64	105.39	83.11	101.83	87.56	104.06	141.36	162.76	125.23	150.56	106.23	126.55	175.94	139.95	148.57	153.94	196.32	119.75	158.35	149.8	111.42	142.67	109.94
239420	239420	Csmd3	0	0	0	0	0	0	0.02	0	0.05	0	0	0	0	0	0	0	0	0	0	0	0	0	0	0	0	0	0	0	0	0.01	0	0	0	0.01	0	0	0.03	0	0.07	0	0	0	0	0	0	0	0
384198	384198	Fam47e	0	0	0.06	0.03	0	0	0	0	0.13	0	0.03	0.03	0.1	0	1.81	0.03	0.03	0.05	0	0.03	0	0.06	0.06	0.05	0	0	0	0	0.03	0	0	0	0.09	0.05	0	0	0	0	0.21	0	0.05	0.05	0.15	0	2.72	0.05	0.04
72123	72123	Ccdc71l	7.9	11.26	5.83	7.44	6.62	7.51	7.51	7.06	7.11	6.99	8.61	8.21	11.53	10.1	7.55	5.45	7.71	9.61	9.81	14.26	10.09	9.93	12.43	10.02	8.15	10.44	10.5	8.88	8.05	13.56	12.3	18.95	9.15	12.52	10.09	12.01	12.97	11.12	11.37	11.62	14.5	12.56	18.09	15.84	11.38	9.29	11.62
216616	216616	Efemp1	8.17	6.64	3.44	5.29	5.19	7.33	30.49	6.06	23.16	9.76	8.28	4.85	8	6.59	11.94	2.77	9.4	10.36	5.22	7.2	7.41	5.83	8.94	21.13	17.72	11.99	11.33	18.32	15.12	9.58	12.71	11.19	5.41	8.9	7.91	11.73	52.68	9.55	37.02	16.24	13.95	7.42	12.56	10.34	18	4.72	14.17
210009	210009	Mtrr	5.18	4.43	4.79	5.07	4.74	4.58	3.72	4.89	3.84	4.22	4.41	4.56	5.35	5.6	3.95	6.55	4.59	3.66	3.99	4.05	4.32	5.58	5.83	4.58	5.46	4.88	5.61	4.98	4.86	5.42	8.06	7.46	7.52	8.52	7.22	7.33	6.42	7.71	6.15	7.03	7.43	6.98	8.4	8.78	5.96	11.17	6.92
434223	434223	Gm1966	1.15	0.72	1.85	2	0.65	1.02	1.04	0.89	0.7	2.03	2.41	1.02	1.33	1	1.02	0.93	1.04	1.23	0.98	1.33	1.58	0.91	0.94	2.42	1.84	1.37	1.59	1.19	1.14	1.57	1.79	1.21	2.9	3.36	0.99	1.63	1.79	1.4	1.12	3.37	4.07	1.57	2.08	1.58	1.54	1.59	1.57
57753	57753	Noc3l	4.98	5.18	4.18	4.3	4.79	4.59	4.96	4.28	4.43	4.1	4.87	4.09	4.85	5.34	3	5.96	4.08	3.59	4.75	6.23	4.46	5.72	5.84	5	4.75	5.62	5.1	5.23	4.24	5.45	7.74	8.72	6.56	7.24	7.3	7.34	8.57	6.74	7.08	6.82	8.21	6.25	7.62	8.38	4.52	10.15	6.14
20983	20983	Syt4	0.04	0.17	0	0.11	0.04	0.68	5.48	0.47	5.1	0.01	0	0.05	0.41	0.62	0.84	0.07	0.1	1.08	0.26	0.3	0.31	0.14	0.4	0.53	0.12	0.7	0.24	0.06	0.99	0.49	0.06	0.28	0	0.18	0.07	1.09	9.47	0.73	8.15	0.02	0	0.08	0.64	0.97	1.26	0.13	0.16
13661	13661	Ehf	6.88	0.04	0.01	0.03	7.48	4.01	0.76	2.42	1.09	0.04	0.05	0.22	2.86	6.39	1.25	0.02	1.48	0.71	2.53	11.11	1.34	2.5	10	1.83	2.36	23.45	2.1	0.16	0.76	2.81	10.71	0.06	0.01	0.05	11.4	6.41	1.32	3.82	1.75	0.06	0.08	0.33	4.49	10.03	1.88	0.03	2.24
269682	269682	Golga3	6.94	9.85	8.23	9.72	6.73	7.91	8.82	7.73	7.31	9.43	9.28	6.96	7.74	7.32	5.79	10.13	6.82	7.04	6.87	7.3	7.49	9	9.58	9.85	9.18	8.93	9.64	8.46	8.75	10.21	10.81	16.58	12.92	16.35	10.26	12.65	15.24	12.17	11.68	15.69	15.62	10.64	12.15	11.48	8.73	17.27	10.28
22355	22355	Vipr2	1.39	1.38	2.39	3.28	0.97	1	1.94	1.08	3.21	2.43	2.03	0.84	0.83	1.07	0.52	2.27	0.7	0.81	0.68	1.52	1.15	2.63	0.44	1.74	2.05	1.18	1.22	0.89	1.41	0.55	2.17	2.32	3.75	5.51	1.48	1.61	3.35	1.7	5.14	4.04	3.42	1.29	1.31	1.67	0.79	3.87	1.05
20716	20716	Serpina3n	22.18	68.62	20.79	43.37	17.86	22.04	87.4	11.18	57.59	61.47	54.12	17.09	18.06	7.68	92.98	29.9	14.29	40.8	10.38	9.46	24.23	25.6	15.66	95.47	48.26	43.22	32.91	85.01	83.18	52.82	34.52	115.52	32.63	72.96	27.21	35.25	151	17.61	92.04	102.28	91.15	26.14	28.35	12.04	140.18	50.95	21.54
320802	320802	Ifitm10	2.35	4.27	4.05	4.98	4	4.14	5.06	1.37	9.66	4.97	7.13	2.6	2.26	1.84	1.71	5.62	3.27	5	2.98	1.16	2.14	3.83	2.36	3.77	2.86	4.17	2.78	3.75	5.08	2.71	3.65	7.2	6.35	8.37	6.1	6.62	8.74	2.15	15.44	8.27	12	3.97	3.55	2.89	2.59	9.58	4.94
100041194	100041194	Ahnak2	8.59	22.64	9.06	13.82	6.58	8.94	10.11	7.94	6.77	12.44	12.8	8.41	10.55	10.47	7.1	15.39	8.14	8.65	9.5	10.85	13.69	14.55	11.94	17.75	15.48	12.94	12.64	12.29	15.62	14.48	13.36	38.11	14.22	23.25	10.03	14.3	17.47	12.5	10.81	20.71	21.55	12.87	16.55	16.42	10.71	26.23	12.27
71131	71131	Zfp689	1.2	0.94	0.58	0.95	0.78	1.06	1.15	1.03	1.29	0.82	1.05	1.06	0.93	0.95	0.78	1.01	0.97	1	0.88	1.38	1.05	1.04	1.31	0.97	1.28	1	1.01	1.09	1.09	1.03	1.87	1.59	0.92	1.59	1.19	1.7	1.99	1.63	2.06	1.37	1.77	1.62	1.45	1.49	1.18	1.71	1.47
70503	70503	Ddo	6.6	5.03	7.31	5.6	9.45	7.48	8.13	5.55	10.86	5.2	3.37	9.73	6.55	7.38	7.63	7.6	7.65	5.65	6.68	0.78	5.99	6.53	6.44	3.86	7.8	5.08	6.2	4.93	6.33	4.21	10.27	8.47	11.48	9.41	14.41	11.97	14.05	8.74	17.35	8.65	5.68	14.88	10.28	11.57	11.51	12.95	11.53
214951	214951	Rhbdl1	8.19	4.1	6.64	4.55	9.57	8.5	8.4	7.28	10.32	5.84	4.38	8.87	7.18	9.12	5.29	3.22	5.71	5.87	7.87	3.76	5.36	3.63	10.78	3.99	9.11	3.96	8.27	8.58	6	4.54	12.75	6.89	10.42	7.65	14.58	13.59	14.51	11.46	16.5	9.73	7.38	13.57	11.27	14.31	7.97	5.48	8.6
66129	66129	Prxl2c	15.98	17.87	13.91	13.67	16.07	15.27	26.59	17.2	23.96	14.32	14.54	15.26	15.51	17.15	21.29	15.56	15.52	17.83	15.69	18.82	17.45	17.46	13.54	15.78	16	17.22	14.6	15.52	16.18	14.07	24.87	30.09	21.83	23	24.49	24.42	45.94	27.08	38.3	23.83	24.49	23.34	24.34	26.89	32.1	26.51	23.4
73191	73191	Fezf1	0	0	0	0	0	0.02	0	0	0	0	0	0	0	0	0	0	0	0	0	0	0	0	0	0	0	0	0.02	0	0	0	0	0	0	0	0	0.03	0	0	0	0	0	0	0	0	0	0	0
76293	76293	Mfap4	286.45	156.96	228.79	273.78	280.75	327.12	293.94	307.31	192.08	280.71	180.01	198.92	257.74	243.79	188.93	375.23	288.7	201.93	229.28	340.81	257.26	464.95	203.5	272.77	258.83	209.57	331.8	228.02	206.86	244.64	445.79	264.24	359.12	460.57	427.89	523.23	507.86	483.88	307.01	467.09	303.16	304.26	404.46	382.27	284.82	639.44	435.23
195646	195646	Hs3st2	0	0	0	0	0	0.19	1.23	0.05	0.92	0	0	0	0	0.26	0.08	0	0.03	0.35	0	0.06	0.03	0	0	0.11	0.03	0.2	0	0	0.18	0	0	0	0	0	0	0.31	2.12	0.08	1.46	0	0	0	0	0.41	0.12	0	0.04
16527	16527	Kcnk3	2.75	0.86	0.46	0.85	0.55	3.3	13.55	2.48	16.77	0.73	0.46	0.5	1.57	2.08	2.63	0.74	0.91	3.79	0.72	2.38	1.25	1.07	1.12	3.95	2.17	4.12	1.4	0.76	3.59	0.71	4.28	1.45	0.72	1.42	0.84	5.28	23.4	3.9	26.8	1.21	0.78	0.76	2.46	3.27	3.97	1.27	1.37
12262	12262	C1qc	203.16	164.76	282.59	286.6	147.74	193.47	141.63	155.02	126.32	437.85	446.36	199.34	187.92	119.52	157.63	219.34	214.22	275.2	195.5	283.32	240.76	175.35	141.57	303.88	225.55	188.31	226.87	422.72	205.59	210.62	316.18	277.38	443.56	482.13	225.17	309.45	244.71	244.09	201.9	728.57	751.7	304.9	294.89	187.42	237.64	373.78	322.96
319185	319185	H2bc13	0	0	0	0	0	0	0	0	0	0.18	0.31	0	0.18	0.21	0.18	0.38	0.35	0	0.28	0.18	0	0.19	0	0	0.17	0	0	0	0	0	0	0	0	0	0	0	0	0	0	0.29	0.52	0	0.29	0.34	0.27	0.64	0.53
22227	22227	Ucp1	0	0.03	0	0.03	0.03	0.03	0.1	0.03	0.06	0	0	0.03	0.08	0.03	0.03	0	0	0.11	0	0.06	0.03	0	0.08	0	0.03	0.03	0	0.05	0	0.03	0	0.05	0	0.04	0.04	0.04	0.17	0.04	0.1	0	0	0.04	0.13	0.04	0.04	0	0
19252	19252	Dusp1	24.63	38.34	29.49	41.17	39.76	40.54	58.18	34.28	47.41	25.81	32.17	48.16	64.5	44.23	26.28	22.96	43.81	55.95	45.79	33.25	39.38	27.69	23.44	73.31	53.94	45.04	44.03	37.8	37.15	57.68	38.34	64.54	46.29	69.26	60.6	64.85	100.53	53.98	75.78	42.95	54.17	73.67	101.22	69.35	39.63	39.12	66.05
320022	320022	Terb1	0.04	0.11	0.01	0.08	0.12	0.1	0.03	0.02	0	0.07	0.03	0.03	0.02	0.04	0.08	0.2	0.06	0	0.02	0.06	0	0.18	0.04	0.03	0.03	0.05	0.08	0.05	0.03	0.1	0.06	0.19	0.02	0.13	0.18	0.16	0.06	0.03	0	0.12	0.04	0.04	0.03	0.06	0.12	0.34	0.09
68001	68001	Cfap298	28.74	20.54	20.96	19.86	27.94	22.86	19.72	21.5	25.06	19.92	17.12	21.69	22.57	24.22	19.11	23.6	24.82	19.36	24.44	23.35	20.52	24	24.03	15.61	18.41	21.7	18.5	20.69	20.38	20.78	44.73	34.57	32.9	33.41	42.59	36.56	34.06	33.85	40.05	33.14	28.82	33.18	35.41	37.98	28.81	40.23	37.42
208151	208151	Tmem132b	0.04	0.01	0	0.01	0.03	0.11	0.42	0	0.23	0.01	0.01	0.01	0.01	0.02	0.02	0.02	0	0.09	0.04	0.05	0.01	0.01	0.01	0.06	0.04	0.17	0.01	0.02	0.07	0	0.06	0.02	0	0.02	0.04	0.18	0.73	0.01	0.36	0.02	0.02	0.01	0.02	0.03	0.04	0.03	0.01
74012	74012	Rap2b	8.93	9.81	9.46	11.06	7.84	8.68	9.7	9	7.24	13.4	17.37	9.56	11.46	9.08	7.09	10.26	9.71	12.2	11.06	16.18	12.93	10.98	10.83	15.03	11.5	12.69	11.67	10.88	10.8	12.46	13.9	16.52	14.85	18.6	11.96	13.89	16.76	14.18	11.58	22.3	29.25	14.62	17.98	14.24	10.69	17.48	14.63
108089	108089	Rnf144a	5.21	5.99	6.11	6.68	6.07	6.7	9.16	9.18	8.1	9.01	7.29	6.6	7.81	7.98	5.58	8.08	5.27	6.05	6.74	8.82	9.33	10.82	6.66	10.05	7.24	7.38	8.62	5.79	6.49	6.18	8.1	10.08	9.59	11.23	9.25	10.72	15.82	14.45	12.95	14.99	12.28	10.1	12.25	12.51	8.42	13.78	7.95
272009	272009	Srsf12	0.36	0.04	0.07	0.08	0.25	0.4	1.36	0.39	0.77	0.07	0.04	0.37	0.59	0.47	0.36	0.03	0.13	0.33	0.56	0.83	0.46	0.14	0.65	0.34	0.49	0.3	0.43	0.15	0.25	0.37	0.56	0.07	0.11	0.13	0.37	0.63	2.35	0.61	1.24	0.12	0.07	0.56	0.92	0.74	0.55	0.05	0.2
50875	50875	Tmod3	24.8	22.07	16.78	21.71	17.06	19.78	22.14	25.53	17.44	22.67	25.93	14.38	25.05	29.7	16.2	18.49	16.2	19.54	24.39	49.8	24.75	23.33	30.78	31.24	21.63	36.97	23.73	19.74	21.32	26.61	38.59	37.16	26.34	36.52	26.01	31.63	38.25	40.19	27.88	37.72	43.68	21.99	39.31	46.57	24.42	31.5	24.42
16716	16716	Ky	21.48	13.57	25.72	19.12	31.42	25.29	4.05	15.71	12.75	15.14	9.07	27.64	20.29	20.95	14.13	22.34	33.34	20.04	21.98	0.04	13.62	24.92	12.21	8.36	26.54	2.18	28.29	10.77	17.69	12.39	33.43	22.85	40.37	32.16	47.88	40.46	7	24.74	20.38	25.19	15.28	42.27	31.84	32.85	21.3	38.06	50.27
66962	66962	Swsap1	4.36	3.07	3.84	3.15	3.53	4.26	3.33	3.82	4.12	3.07	3.7	2.91	3.6	3.56	3.01	4.14	3.3	3.44	3.02	4.41	3.71	4.75	4.02	2.94	4.01	4.33	3.15	3.07	3.35	3.99	6.79	5.17	6.03	5.3	5.37	6.81	5.75	6.01	6.59	5.11	6.24	4.45	5.66	5.58	4.53	7.06	4.98
58520	58520	Erg28	15.21	11.88	10.58	12.71	13.23	15.38	14.99	14.35	14.21	15.33	15.88	11.84	15.18	15.36	32.08	10.58	11.58	12.97	12.97	26.39	15.6	16.41	17.85	16.03	13.2	20.14	14.21	14.89	13.73	16.42	23.68	20	16.61	21.38	20.17	24.59	25.89	22.59	22.71	25.51	26.75	18.11	23.83	24.09	48.36	18.03	17.45
100504491	100504491	Dcdc2b	1.39	1.48	1.67	1.27	1.49	1.28	2.13	1.18	2.19	0.83	0.89	0.56	0.26	0.68	0.32	0.59	0.33	0.09	0.37	0.3	0.29	0.45	0.83	1.14	1.56	1.23	1.29	0.98	0.95	0.76	2.17	2.49	2.63	2.14	2.28	2.04	3.68	1.86	3.5	1.38	1.5	0.86	0.41	1.06	0.48	1	0.49
317652	317652	Klk15	0	3.62	0.08	4.28	0	0	0	0	0	0.22	0.09	0	0	0	0	0	0	0	0	0	0	0	0	0.23	0	0	0	4.23	3.13	4.21	0	6.09	0.12	7.19	0	0	0	0	0	0.37	0.15	0	0	0	0	0	0
98682	98682	Mfsd6	4.76	4.69	3.36	4.42	4.49	5.37	9.49	4.2	9.5	5.72	4.22	3.17	3.97	4.99	4.58	4.05	3.39	4.72	3.32	9.93	4.61	4.13	5.79	5.87	4.5	11.98	5.05	3.49	5.31	4.56	7.4	7.9	5.27	7.43	6.85	8.59	16.39	6.62	15.18	9.52	7.1	4.85	6.23	7.82	6.91	6.89	5.11
246228	246228	Vwa1	24.01	31.17	25.94	27.31	18.69	25.08	43.07	31.42	33.2	30.38	27.92	24.49	32.16	29.04	19.55	23.06	20.67	28.14	25.98	32.83	32.93	32.24	29.08	39.88	22.14	26.83	24.15	29.36	29.56	29.81	37.37	52.48	40.72	45.95	28.49	40.12	74.42	49.48	53.07	50.55	47.02	37.46	50.46	45.54	29.48	39.29	31.17
217138	217138	Prr15l	1.78	0.23	0.56	1.26	2.37	1.45	3.65	0.96	8.81	0.77	0.17	0.24	1.62	1.7	2.46	0.07	0.38	1.9	0.97	2.46	0.45	2.21	2.53	0.85	0.9	4.91	1.11	0.78	1.19	0.93	2.77	0.39	0.87	2.13	3.61	2.33	6.3	1.52	14.07	1.28	0.29	0.37	2.54	2.67	3.71	0.12	0.58
12565	12565	Cdh9	0.01	0.01	0	0.01	0.01	0	0.11	0.01	0.2	0	0	0	0.01	0.02	0.01	0.01	0	0.05	0	0.01	0.03	0	0	0.01	0.04	0.01	0.02	0.09	0.02	0	0.02	0.02	0	0.02	0.02	0	0.19	0.02	0.32	0	0	0	0.02	0.04	0.02	0.02	0
320997	320997	Cyp4f39	3.6	1.71	1.64	1.44	2.74	3.31	0.53	2.27	2.52	0.92	0.77	3.32	3.31	3.79	2.12	0.76	3.52	3.02	4.42	0.16	1.6	0.24	1.82	1.42	2.23	0.19	1.74	1.34	1.69	1.52	5.6	2.88	2.57	2.43	4.17	5.29	0.91	3.57	4.04	1.53	1.3	5.09	5.2	5.94	3.2	1.3	5.3
433294	433294	Mettl21c	14.37	8.83	15.33	9.36	18.85	21.94	4.59	14.11	6.47	9.33	7.1	27.89	11.21	17.91	7.05	2.93	17.27	16.17	25.33	0.05	9.57	2.82	7.83	5.48	12.7	0.3	11.03	7.27	10.75	4.49	22.37	14.86	24.06	15.75	28.73	35.1	7.92	22.21	10.33	15.52	11.96	42.66	17.6	28.08	10.63	4.99	26.04
224860	224860	Plcl2	10.96	7.81	11.43	9.69	11.43	9.06	5.9	9.43	6.95	9.08	8.64	12.82	10.35	10.14	8.13	10.29	13.69	10.74	11.95	5.74	9.8	11.11	8.07	7.74	10.38	4.54	10.66	10.6	9.46	7.94	17.06	13.15	17.94	16.3	17.43	14.49	10.19	14.84	11.11	15.1	14.56	19.61	16.24	15.89	12.25	17.54	20.63
638695	638695	Gm7247	0	0	0	0.02	0	0	0	0.02	0	0	0	0	0	0	0	0	0	0	0	0.02	0	0	0.02	0.02	0.02	0.02	0.02	0	0.02	0	0	0	0	0.04	0	0	0	0.04	0	0	0	0	0	0	0	0	0
67704	67704	1810037I17Rik	78.98	86.24	76.65	77.39	84.54	73.4	96.74	80.1	103.78	78.7	79.68	77.41	94.34	86.31	75.49	58.14	80.35	102.2	94.14	116.88	104.81	94.21	84.61	71.12	66.25	109.34	61.07	92.99	85.62	75.82	122.92	145.19	120.31	130.19	128.85	117.4	167.15	126.12	165.87	130.96	134.19	118.41	148.05	135.34	113.81	99.07	121.12
14065	14065	F2rl3	1.64	2.28	2.29	1.77	1.69	1.08	1.53	2.21	2.23	1.84	1.98	2.23	1.84	2.18	1.21	1.7	1.64	1.98	1.54	1.9	2.4	2.22	1.4	2.47	1.77	1.05	1.6	1.79	2.27	1.69	2.55	3.85	3.59	2.98	2.58	1.73	2.65	3.48	3.56	3.07	3.33	3.42	2.88	3.42	1.82	2.9	2.47
394430	394430	Ugt1a10	0	0	0.04	0	0	0	0	0.02	0	0	0	0	0	0	0.39	0	0	0.05	0	0	0	0	0	0	0.04	0	0	0.04	0	0.04	0	0	0.06	0	0	0	0	0.04	0	0	0	0	0	0	0.59	0	0
232174	232174	Cyp26b1	6.18	10.04	12.1	14.74	1.11	0.66	1.3	0.9	5.84	9.7	13.03	0.64	1.01	0.44	0.81	1.15	0.48	1.33	0.83	1.24	2.94	1.31	1.4	2.02	1.74	2.85	0.96	27.4	10.34	12.54	9.62	16.9	19	24.8	1.69	1.05	2.25	1.42	9.33	16.15	21.94	0.98	1.59	0.69	1.23	1.96	0.72
70350	70350	Basp1	46.36	67.65	39	60.21	30.87	49.32	65.02	48.51	44	50.25	73.15	33.75	52.37	38.57	32.64	29.11	30.57	60.11	40.9	109.42	68.58	50.24	31.17	77.73	45.89	100.23	47.1	53.44	55.83	67.81	72.14	113.89	61.22	101.29	47.04	78.89	112.34	76.39	70.32	83.62	123.2	51.62	82.18	60.47	49.21	49.61	46.09
13196	13196	Asap1	7.99	9.11	6.69	8.9	6.61	7.65	12.61	9.1	8.85	10.55	10.69	7.12	7.94	8.58	6.87	9.51	6.42	8.13	8.31	11.19	10.37	9.77	9.55	12.69	10.29	12.42	9.82	8.88	9.05	10.49	12.43	15.34	10.5	14.98	10.07	12.23	21.79	14.32	14.14	17.55	18	10.89	12.45	13.46	10.36	16.21	9.67
268752	268752	Wdfy2	5.18	6.3	6.14	7.01	4.82	5.27	6.41	5.18	5.71	8.05	10.49	4.73	6.42	5.61	5.31	5.77	4.51	5.51	5.73	7.52	6.74	5.28	6.89	9.49	6.93	7.53	7	6.48	6.97	7.06	8.06	10.61	9.63	11.79	7.35	8.43	11.08	8.16	9.13	13.39	17.66	7.24	10.07	8.8	8	9.83	6.79
213011	213011	Zfp583	0.84	1.13	1	0.91	0.92	1.02	1.6	0.83	0.97	0.9	1.05	0.78	1.13	1.2	0.81	1.12	0.91	0.81	1.1	1.36	1.24	1.12	1.12	1.23	0.92	1.39	1.2	0.94	0.97	1.09	1.3	1.9	1.57	1.53	1.41	1.64	2.76	1.3	1.55	1.5	1.77	1.2	1.78	1.88	1.22	1.92	1.38
217666	217666	L2hgdh	8.27	5.49	7.39	5.86	7.88	7.3	4.27	7.69	6.4	4.82	4.2	8.73	6.68	7.35	10.43	9.35	7.42	6.34	7.06	3.46	5.23	6.83	7.52	4.66	6.9	4.26	7.04	6.18	6.02	5.98	12.87	9.25	11.6	9.85	12.01	11.68	7.38	12.11	10.23	8.03	7.08	13.35	10.49	11.52	15.72	15.94	11.18
74129	74129	Dmgdh	0.01	0	0	0.01	0	0	0	0.01	0	0	0	0	0	0.03	40.93	0	0	0	0	0.01	0	0.01	0	0	0	0	0.01	0	0.01	0	0.02	0	0	0.02	0	0	0	0.02	0	0	0	0	0	0.05	61.71	0	0
434341	434341	Nlrc5	2.23	4.07	2.4	3.57	1.42	1.78	1.74	1.62	1.28	2.55	3.82	1.64	2.01	2.18	2.52	1.5	1.48	1.76	1.7	3.03	2.27	2.11	2.3	3.52	2.54	3.15	2.46	2.76	2.44	3.31	3.46	6.85	3.77	6	2.17	2.85	3	2.55	2.05	4.24	6.43	2.51	3.16	3.42	3.8	2.56	2.23
230597	230597	Zfyve9	10.89	8.94	9.45	8.23	8.98	9.94	7	10.16	8.42	7.76	7.02	10.67	8.69	8.87	7.52	10.37	9.1	8.35	9.72	5.84	7.8	9.37	8.88	7.13	9.17	5.41	8.79	7.13	8.38	8.41	16.95	15.06	14.84	13.85	13.69	15.89	12.1	15.99	13.46	12.91	11.83	16.32	13.63	13.91	11.33	17.67	13.72
12961	12961	Crybb2	0	0	0	0	0	0	0.08	0	0.08	0	0	0	0	0	0.07	0	0	0	0	0	0	0	0	0	0	0	0	0	0	0	0	0	0	0	0	0	0.13	0	0.12	0	0	0	0	0	0.1	0	0
330188	330188	Ccdc63	0.04	0.04	0.09	0.07	0.02	0.16	0.03	0	0	0.04	0.03	0.1	0.05	0.07	0.05	0.16	0.07	0.03	0	0.07	0.08	0.12	0.06	0	0.07	0.08	0.07	0.02	0.02	0.12	0.06	0.07	0.14	0.12	0.04	0.25	0.05	0	0	0.07	0.04	0.15	0.07	0.11	0.07	0.27	0.11
320091	320091	Ano4	1.88	0.22	0.06	0.02	1.04	1.23	0.45	1.56	0.33	0.04	0.1	0.84	2.48	4.48	1.25	0.1	1	0.9	2.25	2.95	1.92	1.64	1.04	0.6	2.21	1.45	2.81	0.66	0.19	0.84	2.93	0.37	0.09	0.03	1.59	1.97	0.78	2.46	0.53	0.06	0.17	1.29	3.89	7.02	1.89	0.17	1.51
102657	102657	Cd276	16.29	21.91	22.15	29.81	16.14	20.57	20.48	16.07	15	30.52	35.18	12.85	18.06	15.36	12.72	24.64	18.1	18.25	16.47	33.13	23.76	25.32	18.04	28.29	18.45	29.87	19.35	19.64	19.44	23.58	25.35	36.89	34.78	50.14	24.59	32.9	35.39	25.3	23.98	50.78	59.24	19.65	28.34	24.08	19.18	41.99	27.28
241732	241732	Tspyl3	3.71	2.93	2.75	3	2.46	3.64	5.69	2.93	4.45	3.95	3.55	3.43	4.3	3.47	2.67	3.22	2.84	4.08	3.54	4.86	4.61	4.12	3.78	3.96	3.88	4.04	3.57	3.5	3.38	3.47	5.77	4.93	4.32	5.05	3.75	5.82	9.83	4.61	7.11	6.57	5.98	5.25	6.75	5.44	4.03	5.49	4.28
68612	68612	Ube2c	34.64	29.25	30.18	39	21.81	26.66	30.97	38.61	28.24	39.13	61.93	18.46	49.15	41.52	23.82	21.17	20.77	31.82	28.63	52.88	47.8	43.37	59.61	31.29	23.76	38.49	28.45	34.69	35.3	37.73	53.9	49.25	47.38	65.61	33.24	42.64	53.51	60.79	45.14	65.11	104.3	28.23	77.12	65.11	35.91	36.08	31.32
13589	13589	Mapre1	18.23	21.85	16.18	19.3	15.79	18.64	27.57	18.95	23.24	18.57	22.16	14.95	21.43	20.51	14.26	17.62	16.31	20.24	19.08	29.57	20.86	20.52	26.11	23.59	18.85	24.52	19.44	18.98	21.03	21.09	28.37	36.79	25.4	32.47	24.06	29.81	47.63	29.84	37.15	30.9	37.32	22.87	33.63	32.16	21.49	30.02	24.59
228026	228026	Pdk1	11.9	12.68	13.26	13.23	14.2	12.78	8.66	12.3	9.32	11.66	11.82	16.32	12.08	11.23	13.99	11.45	15.29	12.5	13.74	5.59	11.51	8.95	13.84	10.68	14.69	9.93	13.4	12.56	11.47	11.19	18.53	21.35	20.82	22.26	21.65	20.45	14.96	19.37	14.89	19.41	19.91	24.96	18.95	17.6	21.09	19.52	23.05
381974	381974	Mrgprg	0	30.01	11.61	17.18	0	0	0.09	0	0	7.67	7.69	0	0	0	0	0	0	0	0	0	0	0	0	0.24	0	0	0	17.97	15.27	12.2	0	50.53	18.23	28.9	0	0	0.15	0	0	12.75	12.95	0	0	0	0	0	0
56774	56774	Slc6a14	1.7	0.01	0.01	0.05	1.38	0.95	0.07	0.4	0.08	0.01	0	0.05	0.18	0.22	0.11	0	0.12	0.07	0.11	1.3	0.25	0.11	0.44	0.24	0.22	5.17	0.22	0	0.07	0.42	2.64	0.02	0.02	0.08	2.11	1.51	0.12	0.62	0.13	0.02	0	0.08	0.29	0.35	0.16	0	0.18
211151	211151	Churc1	77.05	68.36	68.31	60.65	91.99	71.12	73.79	71.19	85.51	65.07	52.66	82.79	77.79	90.22	78.94	68.95	91.56	81.64	84.34	63.09	84.85	76.03	71.88	50.46	71.15	51.79	60.3	72.7	71.95	54.93	119.91	115.08	107.23	102.03	140.2	113.75	127.5	112.09	136.67	108.27	88.69	126.64	122.06	141.47	119.01	117.5	138.04
212085	212085	Trim52	0	0	0	0	0	0	0	0	0	0	0.01	0	0	0	0	0	0	0	0	0.1	0	0	0	0	0.01	0	0	0	0	0	0	0	0	0	0	0	0	0	0	0	0.02	0	0	0	0	0	0
114128	114128	Laptm4b	39.18	33.23	20.92	27.96	23.98	32.15	44.08	36.65	37.19	27.21	18.72	23.44	27.58	29.96	26.56	19.29	20	29	25.22	42.45	31.99	22.89	27.03	25.51	30.63	33.66	27.76	37.12	33.54	30	60.97	55.95	32.83	47.03	36.55	51.42	76.16	57.7	59.44	45.28	31.53	35.85	43.28	46.98	40.05	32.87	30.15
320027	320027	Fstl4	0.27	0	0	0.03	0.06	0.2	0.87	0.28	0.97	0.03	0.01	0.02	0.47	0.5	0.27	0.03	0	0.12	0.05	0.04	0.1	0.01	1.05	0.13	0.28	0.14	0.11	0.2	0.3	0.1	0.43	0	0	0.04	0.1	0.32	1.51	0.44	1.55	0.04	0.02	0.03	0.74	0.79	0.4	0.05	0
71373	71373	Prr16	0.84	0.17	0.17	0.26	0.42	0.5	1.18	0.62	0.71	0.37	0.3	0.38	0.71	0.92	5.26	0.57	0.45	0.68	0.96	1.82	0.67	1.27	0.42	0.9	0.77	0.76	1.39	0.39	0.53	0.86	1.3	0.29	0.27	0.43	0.64	0.79	2.03	0.98	1.14	0.62	0.5	0.58	1.12	1.45	7.94	0.98	0.67
319262	319262	Fchsd1	2.82	2.66	2.19	2.56	2.27	2.54	4.21	2.87	3.23	2.86	2.82	1.81	2.47	2.59	1.94	2.31	1.7	1.96	2.36	3.9	3.11	3.26	2.73	2.91	2.74	4.22	2.37	2.47	2.82	2.68	4.39	4.49	3.44	4.3	3.46	4.07	7.28	4.52	5.16	4.75	4.75	2.77	3.88	4.05	2.92	3.94	2.56
74018	74018	Als2	4.98	5.66	5.59	5.48	5.52	4.76	3.65	4.93	4.07	5.51	4.68	5.1	4.33	4.5	7.38	9.61	5.27	4.29	4.64	4.29	4.69	7.01	4.82	4.82	5.61	4.58	5.71	4.03	4.41	4.66	7.75	9.52	8.78	9.22	8.41	7.61	6.31	7.76	6.51	9.17	7.89	7.81	6.79	7.06	11.12	16.37	7.95
66404	66404	Rtf2	45.91	39.86	40.35	40.58	43.54	41.4	43.97	43	43.97	45.27	44.85	42.67	45.48	42.54	42.57	46.35	43.91	48.28	45.92	54.99	51.53	48.73	41.92	47.09	45.58	46.63	42.38	45.72	40.86	43.27	71.45	67.1	63.34	68.26	66.36	66.22	75.97	67.71	70.27	75.32	75.53	65.26	71.37	66.71	64.18	78.99	66.2
56274	56274	Stk3	8.98	8.01	5.86	8.3	6.76	9.35	16.74	8.68	12.11	7.52	8.68	5.87	9.95	10.23	7.84	6.25	6.76	9.33	8.2	15.11	8.77	7.93	11.34	11.5	9.5	14.33	9.43	9.67	8.49	9.74	13.98	13.49	9.19	13.96	10.3	14.95	28.91	13.67	19.36	12.52	14.62	8.98	15.61	16.05	11.83	10.65	10.2
269966	269966	Nup98	8.66	9.3	7.38	9.01	7.16	8.25	11.79	8.62	9.26	8.83	10.46	6.46	9.09	9.04	6.69	8.99	6.71	8.15	7.62	12.4	9.49	9.27	11.62	11.21	9.85	12.39	10.07	8.86	8.99	11.67	13.47	15.66	11.59	15.16	10.91	13.19	20.37	13.58	14.8	14.69	17.62	9.88	14.26	14.17	10.09	15.33	10.11
75799	75799	4930444P10Rik	0.31	0	0.06	0.06	0.02	0	0	0	0.07	0	0	0	0.02	0.13	0.06	0.07	0.06	0	0.03	0.21	0.13	0.28	0.18	0.09	0	0.12	0.06	0.15	0	0.06	0.49	0	0.1	0.1	0.04	0	0	0	0.11	0	0	0	0.04	0.21	0.1	0.11	0.09
26367	26367	Ceacam2	0	0	0	0	0	0	0	0	0	0	0	0	0.02	0	0	0	0.06	0	0	0.02	0.03	0	0	0	0.01	0.02	0.03	0.03	0.03	0.01	0	0	0	0	0	0	0	0	0	0	0	0	0.03	0	0	0	0.1
100038657	100038657	Myocos	0.08	0	0.07	0.06	0	0	0	0	0	0	0	0	0	0	0	0.08	0.08	0	0	0	0	0.08	0	0	0	0.07	0	0	0.08	0	0.12	0	0.11	0.11	0	0	0	0	0	0	0	0	0	0	0	0.14	0.12
238333	238333	Samd15	0.16	0.1	0.17	0.4	0.09	0.2	0.28	0.14	0.27	0.34	0.14	0.14	0.18	0.12	0.25	0.22	0.17	0.14	0.2	0.28	0.17	0.28	0.27	0.2	0.26	0.19	0.26	0.17	0.12	0.19	0.26	0.16	0.27	0.68	0.14	0.33	0.48	0.23	0.42	0.57	0.24	0.22	0.28	0.19	0.37	0.38	0.26
140497	140497	Cd300c2	25.05	24.42	33.48	35.02	22.81	22.1	23.53	28.08	16.48	39.48	50	59.65	68.5	31.8	32.43	27.96	48.77	78.2	65.13	54.56	74.88	38.05	44.19	67.72	53.76	39.89	52.24	56.84	37.97	57.61	38.99	41.11	52.55	58.92	34.76	35.35	40.65	44.22	26.34	65.7	84.2	91.24	107.49	49.87	48.89	47.64	73.52
23983	23983	Pcbp1	142.61	137.22	131.98	141.54	127.38	134.46	150.32	132.52	125.55	152.97	156.99	118.09	151.82	156.54	134.08	182.67	124.02	130.69	119.15	171.1	138.72	168.52	163.1	141.74	128.38	157.07	145.95	154.8	142.27	160.19	221.93	231	207.17	238.11	194.14	215.08	259.72	208.66	200.67	254.54	264.39	180.63	238.24	245.46	202.14	311.3	186.96
100502950	100502950	Gm3336	0.76	0.04	0	0	0.79	0.32	0.05	0.29	0.09	0.16	0.04	0.09	0	0.22	0.17	0.04	0.17	0.08	0.09	1.29	0.22	0.04	0.17	0.04	0.04	2.98	0.21	0.08	0	0.24	1.18	0.07	0	0	1.2	0.52	0.09	0.46	0.15	0.27	0.07	0.13	0	0.34	0.26	0.07	0.26
217154	217154	Stac2	3.34	15.79	9.16	10.61	3.23	5.87	7.38	3.52	4.35	15.74	8.86	8.12	10.08	5.34	4.68	3.82	6.34	10.19	10.28	6.77	12.69	4.67	7.4	12.25	8.72	7.58	11.7	10.09	13.31	14.57	5.19	26.59	14.38	17.84	4.93	9.39	12.74	5.54	6.95	26.19	14.92	12.42	15.82	8.38	7.06	6.5	9.56
67636	67636	Etfrf1	19.2	20.8	20.66	20.9	23.88	20.53	19.39	19.37	24.87	15.6	18.69	26.58	22.95	24.09	23.65	22.25	29.66	23.28	27.2	15.51	23.71	19.4	19.54	16.62	20.9	14.59	19.36	22.36	19.62	16.98	29.89	35.01	32.43	35.16	36.39	32.84	33.51	30.49	39.76	25.97	31.48	40.65	36.01	37.78	35.65	37.92	44.71
258491	258491	Olfr490	0	0	0	0	0	0	0	0	0	0	0.05	0	0	0	0	0	0	0	0	0	0	0	0	0	0	0	0	0	0	0	0	0	0	0	0	0	0	0	0	0	0.09	0	0	0	0	0	0
75219	75219	Dusp18	5.33	5.49	5.67	5.37	5.43	4.55	3.75	3.14	4.76	6.01	3.49	4.24	4.46	4.6	2.5	6.51	6.48	3.91	4.54	4.24	3.82	7.26	4.36	4.29	5.51	4.45	6.37	9.16	4.88	5.27	8.29	9.25	8.91	9.04	8.28	7.28	6.48	4.95	7.61	10.01	5.88	6.49	7	7.22	3.76	11.09	9.78
320181	320181	Fndc7	1.84	1.7	1.67	1.84	1.54	1.44	2.61	1.97	1.29	1.98	1.91	1.52	1.59	1.93	1.82	1.77	1.49	1.97	1.82	2.28	2.35	1.96	1.2	1.81	1.92	2.21	1.86	2.18	1.89	1.34	2.86	2.87	2.62	3.09	2.35	2.3	4.51	3.11	2.06	3.3	3.21	2.33	2.49	3.03	2.74	3.02	2.25
66496	66496	Ppdpf	77.39	56.19	55.14	48.35	68.59	64.2	55.72	62.12	68.26	58.45	57.16	69.33	63.19	61.87	70.83	49.82	59.97	66.44	68.36	73.37	65.65	60.69	53.97	50.23	58.28	61.16	52.38	66.52	55.54	55.76	120.44	94.6	86.55	81.33	104.53	102.69	96.27	97.81	109.1	97.26	96.25	106.04	99.16	97.02	106.78	84.9	90.41
11754	11754	Aoc3	17.01	14.75	18.32	23.71	13.61	22.72	78.87	21.47	56.09	29.35	25.04	13.74	25.45	25.92	21.39	21.39	15.18	27	11.85	17.47	21.75	17.94	34.37	29.52	25.5	28.59	20.83	20.72	34.37	14.8	26.47	24.84	28.76	39.88	20.74	36.34	136.27	33.8	89.65	48.85	42.17	21.01	39.93	40.64	32.25	36.45	22.88
208117	208117	Aph1b	1.8	2.91	1.84	2.59	1.63	2.03	3.13	2.08	2.86	2.41	2.36	1.7	2.07	2.02	1.98	2.35	2.01	2.08	1.79	2.78	2.48	2.12	2.78	2.28	2.36	2.52	2.42	2.31	2.25	2.31	2.8	4.89	2.88	4.36	2.48	3.24	5.41	3.28	4.57	4.01	3.97	2.6	3.26	3.17	2.99	4	3.02
66044	66044	Dtd1	18.52	11.35	15.3	12.63	18.48	18.07	18.45	16.42	18.28	12.11	10.53	16.15	16.31	18.43	14.83	17.59	16	13.41	16.68	18.85	15.86	18.02	14.85	11.3	15.77	12.99	14.2	12.32	13.58	13.29	28.82	19.11	24.02	21.24	28.17	28.9	31.88	25.85	29.22	20.16	17.74	24.7	25.59	28.9	22.35	29.97	24.12
68259	68259	Ift80	3.92	4.01	3.08	3.51	3.63	3.77	7.43	4.29	5.68	4.12	4.01	2.91	4.56	5.29	2.98	3.4	2.86	3.66	3.35	5.6	4.72	4.82	5.59	4.88	4.4	5.07	4.36	3.27	3.92	3.79	6.1	6.74	4.84	5.91	5.53	6.04	12.84	6.76	9.08	6.85	6.76	4.44	7.16	8.29	4.49	5.79	4.32
380629	380629	Heca	9.46	9	8.35	8.86	8.13	9.66	11	10.14	10.64	8.23	9.42	8.86	9.77	10.3	9.15	8.75	7.99	8.79	10.25	11.35	9.09	9	8.64	11.23	9.96	12.7	9.24	8.28	8.76	9.37	14.72	15.15	13.1	14.91	12.39	15.45	19	15.97	17	13.7	15.87	13.55	15.33	16.15	13.8	14.91	12.04
17022	17022	Lum	154.35	104.24	157.32	202.49	144.38	280.06	337.15	167.37	154.29	246.09	260.46	106.21	184.99	129.93	159.24	185.29	186.24	232.2	149.85	106.7	173.3	196.85	271.22	369.66	222.36	254.54	222.91	353.5	221.04	193.87	240.21	175.49	246.95	340.64	220.05	447.96	582.52	263.53	246.6	409.48	438.64	162.45	290.28	203.74	240.07	315.76	280.77
238726	238726	Fam81b	0.08	0	0	0	0	0.03	0	0	0	0.08	0	0.03	0.03	0.06	0	0	0.06	0	0.06	0	0	0	0.03	0	0.06	0	0.06	0.05	0	0	0.13	0	0	0	0	0.04	0	0	0	0.14	0	0.04	0.05	0.09	0	0	0.09
100041062	100041062	Gm13286	0	0	0	0	0	0	0	0	0	0	0	0	0	0	0	0	0	0	0	0.14	0	0	0	0	0	0	0	0	0.14	0.12	0	0	0	0	0	0	0	0	0	0	0	0	0	0	0	0	0
64379	64379	Irx6	0	0	0	0	0	0.01	0.01	0	0	0.01	0	0	0	0	0.01	0	0	0.01	0	0	0.01	0	0	0	0	0.01	0	0.01	0.01	0	0	0	0	0	0	0.02	0.02	0	0	0.02	0	0	0	0	0.02	0	0
75785	75785	Klhl24	22.3	19.65	19.38	17.56	22.41	19.58	16.12	22.54	19.36	15.26	14.49	25.26	17.31	21.4	16.6	23.09	22.01	18.05	19.6	17.57	21.49	20.77	14.99	19.71	25.98	20.93	19.12	14.26	15.33	15.54	34.7	33.08	30.41	29.54	34.16	31.31	27.85	35.49	30.95	25.39	24.41	38.64	27.16	33.56	25.03	39.34	33.19
232431	232431	Gprc5a	6.27	2.08	1.59	2.3	5.5	4.37	3.65	5.46	2.67	2.35	1.97	1.25	2.77	4.73	2.73	1.2	1.87	2.22	2.64	19.4	4.7	4.32	3.62	3.05	3.54	13.39	2	1.47	2.18	3.1	9.76	3.51	2.49	3.87	8.39	6.98	6.31	8.6	4.27	3.91	3.32	1.92	4.34	7.41	4.11	2.05	2.81
13603	13603	Opn3	1.57	2.08	1.76	2.11	1.94	1.39	1.03	2.18	0.59	2.72	1.44	1.36	1.21	1.62	1.06	4	1.7	1.15	0.86	2.58	1.55	3.14	1.6	1.62	1.59	2.03	1.74	1.96	1.48	1.94	2.45	3.5	2.76	3.56	2.96	2.22	1.78	3.44	0.94	4.53	2.42	2.08	1.9	2.54	1.59	6.81	2.57
115490339	115490339	LOC115490339	0	0	0	0	0	0	0	0	0	0	0	0	0	0.03	0	0	0	0	0	0	0.07	0	0	0	0	0	0	0	0	0	0	0	0	0	0	0	0	0	0	0	0	0	0	0.05	0	0	0
67690	67690	Prss37	0	0	0	0	0	0	0	0	0	0	0	0	0	0	0	0	0	0	0	0	0	0	0	0	0	0	0	0	0.05	0	0	0	0	0	0	0	0	0	0	0	0	0	0	0	0	0	0
171205	171205	Vmn1r8	0	0	0	0	0	0	0	0	0	0	0	0	0	0	0	0	0	0	0	0	0	0.04	0	0	0	0	0	0	0	0	0	0	0	0	0	0	0	0	0	0	0	0	0	0	0	0	0
104099	104099	Itga9	8.79	9.72	5.13	8.19	7.34	10.13	24.68	10.09	23.94	7.95	7.81	5.64	8.6	12.07	8.55	11.39	7	10.84	6.44	12.96	8.02	11.82	9.57	13.25	10.16	14.25	7.19	6.44	11.28	8.25	13.68	16.37	8.05	13.79	11.19	16.2	42.64	15.89	38.27	13.22	13.14	8.63	13.49	18.93	12.88	19.41	10.56
58212	58212	Srrm3	0.19	0.02	0.03	0.07	0.05	0.28	1.01	0.1	1.08	0.47	0.03	0.05	0.05	0.06	0.12	0.05	0.04	0.14	0.03	0.14	0.08	0.05	0.03	0.08	0.14	0.18	0.1	0.03	0.1	0.06	0.29	0.04	0.05	0.12	0.07	0.44	1.74	0.16	1.72	0.78	0.05	0.07	0.08	0.1	0.18	0.09	0.06
242851	242851	Gnat3	0	0.04	0	0	0.09	0	0.05	0	0	0	0.12	0.04	0	0.09	0	0.09	0	0.08	0.04	0.04	0.04	0.04	0.04	0.12	0	0	0.12	0.04	0.04	0.08	0	0.07	0	0	0.13	0	0.08	0	0	0	0.2	0.07	0	0.13	0	0.15	0
627626	627626	Ptchd4	0.01	0.03	0.03	0.02	0.05	0.03	0.07	0.08	0.1	0.06	0.02	0.02	0.02	0.07	0.04	0.04	0.05	0.03	0.02	0.05	0.07	0.03	0.06	0.06	0.03	0.03	0.07	0.01	0.09	0.04	0.01	0.04	0.04	0.03	0.08	0.05	0.12	0.12	0.16	0.1	0.04	0.04	0.03	0.11	0.06	0.06	0.07
80883	80883	Ntng1	0.3	0.16	0.03	0.14	0.18	0.48	0.65	0.4	0.68	0.15	0.03	0.07	0.22	0.31	0.13	0.14	0.17	0.38	0.3	0.67	0.2	0.29	0.15	0.14	0.13	0.5	0.21	0.11	0.12	0.19	0.47	0.27	0.05	0.23	0.28	0.77	1.13	0.63	1.09	0.26	0.05	0.11	0.35	0.49	0.2	0.25	0.26
224648	224648	Uhrf1bp1	4.59	3.7	3.64	3.89	3.53	3.54	3.38	3.8	2.82	3.75	4.01	3.51	3.74	3.65	3.07	4.67	3.36	3.15	3.67	3.49	3.28	3.58	5	4.05	4.66	3.93	4.83	3.77	3.6	4.35	7.14	6.23	5.72	6.55	5.37	5.66	5.84	5.98	4.51	6.24	6.75	5.37	5.87	5.72	4.63	7.96	5.06
12983	12983	Csf2rb	12.38	13.98	18.62	20.2	9.36	9.83	10.47	9.39	5.88	20.28	29.82	19.75	24.98	13.75	11.57	13.38	14.48	25.13	18.95	22.29	26.66	12.45	19.09	40.83	23.32	22.01	25.64	24.37	19.65	27.26	19.27	23.53	29.23	33.98	14.26	15.72	18.09	14.78	9.41	33.74	50.23	30.21	39.2	21.57	17.45	22.8	21.83
57248	57248	Ly6i	4.08	1.44	1.76	2.43	0.87	1.96	1.29	1.06	0.85	1.77	2.58	1.36	2.07	1.36	1.15	0.77	0.96	1.75	0.74	2.48	1.98	1.28	0.72	1.63	1.73	3.7	1.46	2.33	1.81	2.01	6.35	2.42	2.76	4.08	1.32	3.13	2.22	1.68	1.35	2.94	4.34	2.08	3.25	2.14	1.73	1.31	1.45
238405	238405	Adam6b	0	0	0	0	0	0.05	0	0	0	0	0	0	0	0	0	0.02	0.02	0	0	0	0	0.02	0.02	0	0	0	0	0	0	0	0	0	0	0	0	0.09	0	0	0	0	0	0	0	0	0	0.03	0.03
227615	227615	Tmem203	15.42	14.84	12.38	13.45	12.65	15.93	17.58	13.94	17.72	11.41	13.15	14.76	13.56	15.12	13.67	15.34	13.86	16.75	16.11	18.21	19.14	15.97	14.13	14.58	14.6	15.07	12.98	19.49	13.92	14.48	24	24.98	19.43	22.63	19.28	25.49	30.37	21.94	28.32	18.98	22.14	22.57	21.27	23.7	20.61	26.14	20.89
233164	233164	Gm4884	0	0	0	0	0	0	0	0	0	0	0	0	0	0	0	0	0	0	0	0	0	0	0	0	0	0	0	0	0	0.01	0	0	0	0	0	0	0	0	0	0	0	0	0	0	0	0	0
73032	73032	Ttc9b	0	0	0	0.06	0	0.17	1.3	0	2.04	0	0.06	0	0	0	0.12	0	0	0.23	0	0	0	0.06	0	0.06	0.06	0.18	0	0.06	0.41	0	0	0	0	0.09	0	0.27	2.25	0	3.25	0	0.1	0	0	0	0.18	0	0
103284	103284	Zc3h10	8.98	7.37	6.63	7.54	6.67	6.86	6.56	7.56	6.74	7.14	7.59	6.21	8.23	8.11	6.25	6.79	5.9	7.1	6.88	10.22	7.87	7.87	6.33	8.6	8.07	9.33	7.56	7.01	7.02	8.3	13.98	12.41	10.41	12.68	10.16	10.97	11.33	11.9	10.78	11.88	12.78	9.5	12.91	12.72	9.42	11.58	8.89
19227	19227	Pthlh	2.63	1.66	2.44	2.64	2.08	2.93	2.78	3.47	2.95	2.04	1.39	2.12	4.91	3.77	1.52	2.11	2.25	1.12	2.9	4.96	1.99	4.62	2.61	2.9	2.06	3.86	1.78	1.58	3.21	3.17	4.09	2.8	3.83	4.44	3.18	4.69	4.8	5.46	4.71	3.39	2.34	3.24	7.7	5.91	2.29	3.59	3.39
546729	546729	Calhm1	0	0.05	0	0	0	0	0	0	0	0	0	0	0	0	0	0	0	0	0	0	0	0	0	0	0	0	0	0	0	0	0	0.08	0	0	0	0	0	0	0	0	0	0	0	0	0	0	0
224703	224703	March2	61.44	56.74	62.52	51.07	72.42	63.56	68.63	57.93	80.22	50.47	43.97	72.66	59.72	63.28	53.45	54.68	67.49	65.65	71.48	45.04	58.4	54.84	51.6	47.45	58.96	37.85	48.5	55.03	54.7	48.32	95.62	95.52	98.13	85.91	110.37	101.67	118.58	91.22	128.21	83.98	74.04	111.14	93.71	99.23	80.57	93.19	101.74
321019	321019	Gpr183	0.92	1.14	1.34	1.86	0.7	0.94	1.08	0.89	0.68	2.82	5.68	0.95	1.17	0.94	0.44	1.17	1.28	0.98	0.77	1.22	1.01	0.79	1.16	2.67	1.25	0.99	1.27	2.2	1.32	1.59	1.43	1.92	2.1	3.13	1.07	1.51	1.86	1.41	1.09	4.69	9.57	1.45	1.84	1.48	0.67	2	1.92
78655	78655	Eif3j1	63.8	57.51	63.58	54.33	64.13	59.94	44.02	68.3	51.92	51.35	50.52	70	57.92	60.64	47.4	66.24	64.35	57.16	59.79	35.51	52.96	50.51	57.34	43.4	52.37	38.03	50.73	56.81	56.55	53.77	99.28	96.81	99.8	91.39	97.74	95.88	76.05	107.54	82.99	85.45	85.07	107.07	90.89	95.09	71.46	112.89	97.01
243983	243983	Zdhhc13	7.8	17.49	4.51	7.74	7.45	6.46	7.01	6.4	5.65	5.84	6.93	4.02	6.45	6.4	4.67	6.95	4.78	5.03	5.24	13.76	6.77	8.08	8.32	6.71	6.36	14.09	6.23	8.24	6.69	11.31	12.13	29.45	7.07	13.02	11.35	10.33	12.11	10.08	9.03	9.72	11.67	6.15	10.12	10.04	7.04	11.84	7.2
72999	72999	Insig2	19.05	25.1	20.65	21.75	21.04	18.25	17.67	18.9	20.97	17.32	15.21	22.47	20.03	18.71	33.19	21.39	21.53	21.6	21.57	15.23	19.21	19.51	17.57	16.49	19.2	15.02	17.18	21.29	21.33	18.45	29.64	42.26	32.41	36.59	32.07	29.2	30.53	29.76	33.52	28.83	25.61	34.37	31.43	29.34	50.04	36.45	32.46
19683	19683	Rdh16	0.1	0.01	0	0	0	0	0	0	0	0	0	0.03	0.01	0.04	9.43	0	0.04	0.02	0.01	0.06	0	0.04	0.03	0	0.04	0.1	0.06	0.02	0	0.02	0.16	0.02	0	0	0	0	0	0	0	0	0	0.04	0.02	0.06	14.22	0	0.06
12334	12334	Capn2	48.97	85.59	68.65	81.37	51.8	56.04	76.08	55.41	55.92	85.26	75.19	49.27	58.94	55.23	46.37	63.41	54.68	59.45	50.69	68.17	64.05	66.57	69	77.83	63.53	65.22	62.29	64.19	74.82	64.53	76.21	144.1	107.76	136.88	78.95	89.63	131.45	87.24	89.38	141.87	126.63	75.35	92.49	86.6	69.91	108.06	82.43
78267	78267	Klhdc8b	13.36	8.63	7.54	7.38	14.24	12.5	32.55	13.66	33.67	7.85	7.73	10.72	13.51	15.53	13.53	13.58	9.96	11.18	12.62	16.69	13.65	18.86	25.47	12.57	13.42	15.19	10.75	12.72	13.59	10.12	20.78	14.52	11.84	12.42	21.7	20	56.23	21.51	53.82	13.06	13.02	16.4	21.21	24.35	20.4	23.14	15.02
51813	51813	Ccnc	6.02	6.87	6.23	6.98	6.67	5.57	8.94	6.61	6.71	6.39	6.88	6.08	6.87	6.45	6.37	7.04	6.49	6.74	7.1	8.04	6.98	7.85	7.81	6.66	6.57	5.97	6.34	6.48	6.86	7.41	9.37	11.56	9.78	11.74	10.17	8.92	15.45	10.4	10.72	10.64	11.59	9.3	10.78	10.12	9.6	11.99	9.78
329557	329557	Svs3b	0	0	0	0	0	0	0	0	0	0	0	0	0	0	0	0	0	0	0	0	0	0	0	0.04	0	0.04	0	0	0	0	0	0	0	0	0	0	0	0	0	0	0	0	0	0	0	0	0
27403	27403	Abca7	4.62	7.47	4.66	5.63	4.11	3.96	9.54	4.74	9.35	5.68	5.49	4.22	5.18	5.22	3.66	4.79	3.65	4.36	4.15	4.98	5.49	5.12	4.87	6.29	6.06	5.01	5.14	5.64	5.91	5.62	7.19	12.57	7.31	9.47	6.26	6.34	16.48	7.47	14.95	9.45	9.25	6.45	8.14	8.19	5.51	8.16	5.51
74359	74359	4931414P19Rik	3.17	2.47	2.61	2.52	3.24	3.09	2.61	2.55	2.77	2.66	2.66	2.42	2.5	3.64	2.38	2.79	2.36	2.72	2.42	3.25	2.47	3.34	3.07	2.21	3.1	3.81	2.58	2.51	2.57	2.43	4.93	4.16	4.09	4.23	4.93	4.94	4.51	4.01	4.43	4.42	4.48	3.69	3.92	5.7	3.59	4.75	3.56
74256	74256	Cyld	5.87	6.29	5.77	6.27	6.03	5.82	5.5	5.58	6.31	6.74	6.41	6.43	5.42	5.49	4.58	13.44	6.18	5.58	5.68	5.98	5.38	9.35	6.02	6.34	6.63	6.67	6.11	6.06	6.02	6.01	9.13	10.59	9.06	10.55	9.19	9.32	9.5	8.79	10.08	11.22	10.79	9.84	8.51	8.61	6.91	22.91	9.32
252875	252875	Mios	6.79	5.94	5.26	5.91	5.15	5.76	5.71	5.83	5.39	5.59	5.78	5.43	6.45	6.15	5	7.27	5.75	5.02	5.49	6.25	5.63	6.71	7.42	6.19	6.25	6.31	6.77	6.43	5.33	6.3	10.56	9.99	8.26	9.94	7.85	9.21	9.87	9.19	8.61	9.3	9.73	8.3	10.13	9.65	7.54	12.4	8.66
78593	78593	Nrip3	0.04	0.11	0.03	0.06	0.02	0.25	1.27	0.14	1	0.11	0.1	0.02	0.03	0.1	0.09	0.1	0.01	0.14	0.02	0.07	0.04	0.04	0.06	0.28	0.06	0.37	0.11	0.05	0.28	0.08	0.06	0.19	0.05	0.1	0.03	0.4	2.19	0.22	1.6	0.18	0.17	0.03	0.05	0.15	0.14	0.16	0.02
56360	56360	Acot9	25.01	32.62	27.19	28.91	29.84	27.81	24.84	28.77	25.69	30.15	23.92	31.19	28.1	25.64	18.32	27.83	31.05	26.08	26.22	30.82	26.86	30.8	30.28	25.97	26.57	31.01	23.35	34.37	26.64	29.83	38.92	54.92	42.68	48.64	45.48	44.49	42.93	45.29	41.07	50.17	40.29	47.7	44.09	40.21	27.61	47.42	46.8
224697	224697	Adamts10	18.58	16.8	16.54	16.11	16.67	19.3	30.48	23.86	24.43	19.79	23.36	17.29	22.34	23.42	16.9	19.43	14	14.41	24.57	30.38	25.65	26.09	19.45	27.23	21.96	23.49	21.64	17.99	17.25	20.99	28.92	28.28	25.97	27.1	25.4	30.87	52.66	37.57	39.05	32.92	39.34	26.44	35.06	36.73	25.48	33.11	21.11
241118	241118	Asic4	0.31	0	0	0.02	0.05	0.11	0.72	0.25	0.3	0.02	0	0.05	0.33	0.26	0.14	0.02	0.05	0.2	0.05	0.06	0.05	0.07	0.13	0.05	0.17	0.05	0.09	0.11	0.14	0.06	0.49	0	0	0.03	0.07	0.17	1.25	0.39	0.48	0.03	0	0.08	0.51	0.41	0.22	0.03	0.07
100135657	100135657	Rhox3e	0	0.1	0	0.09	0.1	0	0	0	0	0.09	0	0	0	0.1	0	0.1	0	0	0.2	0	0	0	0	0	0.09	0	0	0	0.1	0	0	0.17	0	0.16	0.15	0	0	0	0	0.16	0	0	0	0.16	0	0.17	0
70747	70747	Tspan2	7.78	7.18	3.81	5.54	4.11	8.48	31.85	9.18	28.75	4.34	3.93	4.7	12.36	14.09	8.75	3.79	4.89	11.02	6.11	9.71	7.8	7.14	14.8	9.24	10.31	10.33	7.57	7.14	14.7	5.39	12.11	12.08	5.99	9.31	6.27	13.57	55.03	14.46	45.95	7.23	6.61	7.19	19.4	22.09	13.19	6.47	7.37
18595	18595	Pdgfra	33.51	38.77	24.65	36.95	20.74	33.37	41.01	35.63	30.05	38.3	45.52	18.4	28.39	23.75	22.88	20.29	18.8	29.08	24.68	55.42	41.76	23.71	25.98	57.33	41.98	46.39	42.92	61.98	32.8	49.02	52.15	65.27	38.7	62.15	31.61	53.37	70.85	56.11	48.03	63.72	76.66	28.14	44.55	37.24	34.49	34.58	28.35
70527	70527	Stambp	7.51	8.13	6.96	8.85	7.3	8.09	11.85	7.73	11.07	8.35	8.45	7.19	8.53	8.77	8.95	9.76	8.26	9.42	7.9	10.26	8.19	9.48	8.73	8.31	8.3	11.11	8.15	8.71	8.45	8.61	11.69	13.69	10.93	14.89	11.13	12.94	20.47	12.18	17.7	13.9	14.24	10.99	13.39	13.76	13.5	16.63	12.45
11615	11615	Gm4737	0	0.1	0	0	0	0	0	0.09	0	0	0	0	0	0	0	0	0	0	0	0	0	0	0	0	0	0	0	0	0	0	0	0.16	0	0	0	0	0	0.15	0	0	0	0	0	0	0	0	0
102632660	102632660	Gm30679	0.09	0.05	0.01	0.04	0.07	0.04	0	0.05	0.02	0.03	0	0.04	0.14	0	0.04	0.03	0	0.05	0.04	0.1	0.07	0.04	0.03	0.04	0.01	0.05	0.03	0.04	0.03	0.01	0.15	0.09	0.02	0.07	0.11	0.06	0	0.08	0.02	0.04	0	0.06	0.22	0	0.06	0.05	0
235431	235431	Coro2b	3.52	5.59	3.94	5.31	3.96	4.64	6.79	3.58	4.96	6.49	4.45	2.8	3.04	3.18	2.79	6.29	3.37	3.82	3.19	4.46	3.93	6.16	4.13	4.77	4.13	3.32	3.53	4.88	4.22	3.7	5.48	9.42	6.18	8.92	6.04	7.42	11.74	5.63	7.94	10.8	7.49	4.28	4.77	4.99	4.21	10.72	5.08
100503353	100503353	Gm14440	3.55	3.91	3.77	3.23	2.49	3.27	5.48	3.85	4.26	3.31	3.24	3.08	3.4	5.25	4.08	3.8	3.43	3.19	3.35	2.78	4.13	3.1	4.37	5.32	4.97	3.02	4.33	2.23	3.83	4.39	5.53	6.58	5.91	5.43	3.79	5.23	9.47	6.06	6.81	5.51	5.46	4.71	5.34	8.24	6.15	6.47	5.17
69129	69129	Pex11g	7	3.75	4.12	3.25	5.83	4.88	4.09	2.94	3.18	4.76	2.68	3.81	3.48	4.38	13.34	6.73	5.21	4.75	4.58	5.86	5.14	5.71	5.47	3.22	4.54	6.89	3.99	5.15	3.91	4.5	10.9	6.32	6.47	5.47	8.88	7.81	7.07	4.63	5.09	7.92	4.52	5.83	5.46	6.87	20.11	11.47	7.86
217698	217698	Acot5	0	0	0.03	0.06	0.13	0.09	0.12	0.06	0.26	0.25	0	0	0	0	0	0	0.06	0.16	0.07	0.18	0.06	0.04	0	0.07	0.03	0.03	0.12	0	0.03	0	0	0	0.05	0.11	0.2	0.14	0.2	0.1	0.42	0.41	0	0	0	0	0	0	0.09
414872	414872	Zyg11b	6.88	7.25	6.91	7.17	7.53	7.72	7.21	7.46	8.05	6.39	6.23	8.7	7.15	7.61	6.02	7.44	7.87	7.14	7.34	5.41	6.21	7.32	8.84	7.32	9.83	6.29	10.36	5.86	7.73	7.66	10.71	12.21	10.85	12.06	11.48	12.36	12.46	11.74	12.87	10.63	10.49	13.31	11.22	11.93	9.07	12.68	11.87
67197	67197	Zcrb1	99.59	83.28	90.9	74.57	95.87	84.68	76.56	95.81	93.6	68.35	71.91	107.22	89.34	102.21	81.89	67.34	99.75	88.21	114.99	62.32	88.03	71.04	76.75	58.45	75.59	55.52	63.25	84.52	81.23	66.53	154.99	140.21	142.69	125.45	146.11	135.45	132.28	150.87	149.61	113.73	121.09	163.99	140.2	160.27	123.45	114.75	150.37
67367	67367	Paxbp1	14.47	13.58	12.62	11.75	12.56	12.04	20.59	12.77	17.28	10.08	12.48	15.08	18.32	15.81	12.47	13.93	13.16	10.97	18.61	21.11	19.7	18.75	15.09	13.88	14.66	15.05	12.34	13.4	11.43	13	22.51	22.86	19.82	19.77	19.14	19.25	35.57	20.1	27.61	16.77	21.01	23.06	28.75	24.79	18.8	23.74	19.84
236781	236781	Gpr119	0.02	0	0	0	0	0	0	0	0	0	0	0.02	0	0	0	0	0	0	0	0	0	0.02	0	0	0	0	0.04	0	0	0	0.03	0	0	0	0	0	0	0	0	0	0	0.03	0	0	0	0	0
216527	216527	Ccm2	23.62	24.23	19.96	22.24	19.32	21.42	30.25	23.74	23.86	23.98	22.6	18.09	23.51	21.75	18.35	18.8	18.71	19.85	21.36	29.87	22.7	23.52	22.16	24.56	23	24.5	21.75	24.92	22.53	24.02	36.75	40.79	31.33	37.41	29.44	34.26	52.26	37.38	38.14	39.9	38.05	27.67	36.9	34.11	27.67	32.04	28.2
108161	108161	Fam50b	0	0	0	0	0	0.04	0	0	0	0	0.04	0	0	0	0.12	0	0	0	0	0	0	0	0	0	0	0	0	0	0	0	0	0	0	0	0	0.06	0	0	0	0	0.06	0	0	0	0.17	0	0
227746	227746	Rabepk	5.88	5.91	6.96	6.34	6.67	6.91	7.46	5.96	7.38	5.92	6.45	5.65	8.13	7.1	5.71	6.06	6.23	6.79	6.53	9.15	7.94	8.37	8.79	7	6.57	7.27	6.52	7.36	6.13	7.15	9.15	9.95	10.92	10.67	10.17	11.06	12.88	9.39	11.79	9.85	10.86	8.64	12.76	11.13	8.61	10.32	9.4
320460	320460	Vwc2l	0	0	0	0	0	0	0.08	0	0.05	0	0.02	0	0	0	0.02	0	0	0.01	0	0	0	0	0	0.01	0	0.01	0	0	0	0	0	0	0	0	0	0	0.14	0	0.08	0	0.03	0	0	0	0.02	0	0
56710	56710	Brinp1	0.27	0.26	0.21	0.3	0.32	0.34	0.45	0.23	0.73	0.46	0.34	0.25	0.24	0.19	0.22	0.56	0.5	0.35	0.41	0.6	0.42	0.38	0.2	0.61	0.17	0.35	0.22	0.37	0.3	0.47	0.41	0.43	0.33	0.51	0.48	0.54	0.77	0.36	1.16	0.76	0.58	0.39	0.37	0.3	0.33	0.96	0.76
27398	27398	Mrpl2	59.04	48.38	58.48	46.15	64.13	58.25	45.07	60.06	63.32	49.72	49.09	69.16	55.59	58.53	56.53	62.95	63.88	56.81	61.82	44.86	54.91	59.42	55.98	40.07	53.71	35.28	48.06	58.39	48.34	46.98	91.88	81.44	91.79	77.63	97.73	93.17	77.88	94.56	101.21	82.72	82.67	105.79	87.23	91.78	85.22	107.28	96.31
227059	227059	Slc39a10	5.83	4.74	4.22	5.25	3.38	5.22	6.87	5.31	4.79	5.44	5.11	3.21	5.24	6.99	3.26	4.52	3.88	4.83	5.54	10.66	5.56	5.17	6.69	8.26	6.07	8.76	7.2	4.74	5.27	7.17	9.08	7.99	6.63	8.84	5.15	8.35	11.86	8.36	7.65	9.06	8.6	4.9	8.23	10.97	4.92	7.71	5.85
74490	74490	Mamstr	10.85	9.13	22.73	18.71	27.97	14.19	9.46	11.58	14.68	13.69	9.43	23.9	14.53	13.5	8.87	45.05	21.78	10.19	16.89	3.23	15.41	29.76	10.06	6.97	13.96	4.37	15.11	10.8	8.57	7.88	16.89	15.38	35.68	31.47	42.63	22.7	16.34	18.24	23.46	22.77	15.88	36.55	22.8	21.17	13.38	76.76	32.84
18577	18577	Pde4a	8.61	7.62	7.87	7.77	8.58	8.76	6.69	8.9	7.87	6.06	6.68	9.51	8.27	8.09	6.25	5.45	7.96	6.67	8.55	5.89	7.41	5.9	7.17	6.35	9.45	5.18	8.51	6.18	7.76	6.61	13.4	12.83	12.35	13.08	13.08	14.01	11.56	14.01	12.58	10.08	11.25	14.54	12.98	12.69	9.42	9.29	12.01
100043332	100043332	Ankrd66	0.81	1.03	0.86	0.96	0.66	0.82	0.84	0.63	1.04	0.79	1.03	1.84	2.09	0.93	0.75	0.55	1.14	1.7	1.88	1.2	2.06	1.06	0.86	2.2	0.84	0.78	1.29	0.93	0.63	1.92	1.26	1.74	1.35	1.61	1.01	1.31	1.44	0.99	1.66	1.31	1.74	2.82	3.28	1.45	1.14	0.94	1.72
29861	29861	Dpf1	1.2	0.77	1.14	1.15	1.18	1.67	2.81	0.85	2.03	1.53	0.93	0.73	2.01	0.97	0.99	0.99	0.86	1.3	1.46	1.14	1.23	1.33	1.86	1.43	1.25	0.91	1.3	1.65	1.87	1.17	1.87	1.3	1.79	1.93	1.8	2.67	4.85	1.34	3.24	2.54	1.56	1.12	3.15	1.52	1.49	1.68	1.29
14758	14758	Gpm6b	8.61	5.68	5.99	7.14	6.37	7.72	11.91	8.16	7.99	7.66	7.31	5.84	10.91	10.87	6.83	6.81	6.32	6.72	8.24	15.22	10.67	11.15	11.03	9.01	8.51	8.15	12.49	9.38	6.48	8.3	13.39	9.56	9.4	12.02	9.71	12.36	20.57	12.85	12.77	12.75	12.32	8.93	17.12	17.05	10.29	11.6	9.53
228875	228875	Slc35c2	22.84	18.44	19.35	19.9	20.3	17.96	19.2	18.91	18.99	21.35	24.5	16.56	19.31	18.8	19.25	18.12	17.73	20.24	20.2	26.58	22.27	21.83	20.69	19.8	21.33	19.81	17.95	23.15	19.76	20.62	35.55	31.04	30.38	33.47	30.93	28.73	33.17	29.77	30.35	35.53	41.25	25.33	30.31	29.48	29.03	30.87	26.73
11964	11964	Atp6v1a	24.14	44.51	22.67	31.56	24.25	24.32	29.91	25.3	25.25	29.62	54.21	32.67	40.59	34.77	24.89	27.22	31.99	43.34	37.52	49.58	42.27	30.5	38.2	48.21	33.62	50.4	39.87	36.35	37.37	50	37.57	74.94	35.58	53.09	36.96	38.9	51.68	39.84	40.36	49.28	91.3	49.97	63.69	54.52	37.52	46.39	48.22
224105	224105	Pak2	16.38	16.68	13.71	16.5	14.09	15.8	22.61	16.98	18.08	16.54	21.3	12.64	18.87	18	12.97	14.67	13.83	17.9	16.6	29.53	18.25	17.52	22.23	23.4	16.36	26.93	18.59	17.29	18.13	21.32	25.49	28.09	21.52	27.76	21.48	25.27	39.06	26.74	28.89	27.53	35.87	19.34	29.61	28.22	19.56	25	20.84
382073	382073	Ccdc84	6.78	6.82	6.59	6.56	6.36	6.24	7.98	5.85	8.61	4.94	5.6	5.3	7.28	6.29	7.02	7.28	5.05	4.19	7.07	8.16	6.3	9.02	6.42	6.11	6.7	6.58	5.72	5.63	5.54	5.83	10.55	11.48	10.35	11.04	9.7	9.98	13.79	9.21	13.76	8.22	9.43	8.11	11.43	9.86	10.59	12.41	7.62
115490131	115490131	Tmem271	0.99	1	0.57	0.32	0.92	0.72	1.78	0.73	1.3	0.58	0.43	0.48	0.68	0.73	0.54	0.79	0.64	0.61	0.72	1	0.45	0.85	0.62	0.73	0.91	0.67	0.73	0.79	0.79	0.69	1.54	1.68	0.9	0.55	1.4	1.14	3.07	1.15	2.08	0.97	0.72	0.73	1.06	1.14	0.81	1.34	0.97
384059	384059	Tlr12	2.09	0.13	0.52	0.34	0.75	1.07	0.78	1.47	0.96	0.34	0.39	1.1	0.89	1.21	0.84	0.28	1.03	1.14	1.47	2.59	1.47	0.83	0.86	1.06	1.55	1.53	0.56	0.47	0.26	0.85	3.25	0.22	0.81	0.56	1.15	1.71	1.34	2.31	1.54	0.56	0.65	1.69	1.4	1.89	1.26	0.48	1.55
115490334	115490334	LOC115490334	0.04	0	0.04	0.02	0.14	0.08	0	0	0	0.04	0	0	0	0.02	0	0.14	0.04	0.09	0.12	0.05	0	0.14	0.09	0.02	0.04	0.04	0.04	0.02	0.09	0	0.07	0	0.07	0.04	0.21	0.14	0	0	0	0.07	0	0	0	0.04	0	0.23	0.07
115488278	115488278	LOC115488278	0.01	0.03	0.03	0.03	0.01	0	0	0.01	0.02	0.01	0	0	0.02	0.02	0.01	0.02	0.01	0.01	0.01	0	0.02	0	0	0.01	0.01	0.03	0.01	0.01	0.01	0.01	0.01	0.05	0.05	0.06	0.01	0	0	0.01	0.03	0.01	0.01	0	0.04	0.02	0.01	0.04	0.02
67991	67991	Nacc2	9.86	6.61	6.39	6.42	6.65	9.69	23.98	9.49	21.6	8.04	6.59	7.69	10.37	10.27	9.22	6.7	7.66	10.38	8.57	7.92	7.79	6.82	11.59	11.27	11.57	9.87	10.3	7.57	12.87	7.62	15.34	11.13	10.03	10.8	10.13	15.5	41.44	14.94	34.52	13.37	11.1	11.76	16.27	16.11	13.9	11.42	11.55
319670	319670	Eml5	0.85	0.56	0.88	0.63	1.02	0.85	2.27	0.81	2.44	0.55	0.31	0.9	0.59	0.7	0.82	1.59	0.99	0.73	0.97	0.8	0.6	1.15	0.56	0.65	0.94	0.75	0.85	0.3	0.6	0.56	1.32	0.94	1.39	1.07	1.56	1.37	3.92	1.27	3.9	0.91	0.53	1.38	0.93	1.1	1.23	2.71	1.5
239647	239647	Pced1b	6.09	2.64	2.82	2.57	5.57	5.02	5.66	4.1	6.91	3.68	4.1	3.21	3.65	4.14	3.39	2.07	2.35	3.99	3.87	9.92	4.23	3.57	3.88	4.98	4.32	8.63	3.4	3.46	2.54	4.1	9.48	4.44	4.43	4.32	8.5	8.03	9.77	6.45	11.04	6.13	6.9	4.91	5.72	6.49	5.11	3.53	3.55
20890	20890	Wnt8a	0.03	0	0	0	0	0	0	0	0	0	0	0	0	0	0	0	0	0.03	0	0.03	0	0	0	0	0	0	0	0	0	0	0.05	0	0	0	0	0	0	0	0	0	0	0	0	0	0	0	0
68026	68026	Pclaf	14.17	10.35	10.54	12.65	7.06	9.21	10.17	12.34	8.19	12.35	24.05	6.01	16.29	14.76	7.97	8.5	8.15	11.2	10.69	19.48	16.06	13.51	23.49	12.21	9.76	13.15	12.41	11.24	11.06	14.41	22.05	17.42	16.55	21.28	10.76	14.72	17.57	19.43	13.1	20.55	40.51	9.19	25.56	23.15	12.01	14.48	12.29
30841	30841	Kdm2b	8.28	6.07	4.88	5.8	6.18	7.06	10.65	7.2	9.08	5.95	7.57	4.81	6.05	7.23	5.52	6.24	4.94	5.84	6.41	9.81	6.34	6.64	7.87	7.84	7.69	9.47	6.73	5.68	6.61	7.12	12.89	10.21	7.66	9.76	9.42	11.29	18.4	11.34	14.52	9.9	12.76	7.35	9.49	11.34	8.32	10.64	7.45
18185	18185	Nrl	0	0.02	0	0	0	0	0	0	0	0	0	0.03	0	0	0	0	0	0	0	0	0	0	0	0	0.03	0	0	0	0	0	0	0.03	0	0	0	0	0	0	0	0	0	0.05	0	0	0	0	0
319239	319239	Npsr1	0	0	0	0	0.01	0	0	0	0	0	0	0	0	0	0	0.03	0	0	0	0.01	0	0	0.01	0	0	0	0	0	0	0	0	0	0	0	0.02	0	0	0	0	0	0	0	0	0	0	0.04	0
100042295	100042295	Gm3776	0	0.09	0.03	0.18	0	0	0	0	0	0.06	0	0	0	0.06	0.22	0.12	0	0.08	0	0	0	0	0.11	0	0	0	0	0	0	0.15	0	0.16	0.05	0.3	0	0	0	0	0	0.1	0	0	0	0.1	0.33	0.21	0
212937	212937	Tifab	4.68	4.13	5.6	6.24	3.73	3.04	3.82	4.18	3.6	7.89	7.23	4.67	6.42	4.07	4.3	5.5	5.3	7.11	6.27	7.16	8.4	5.17	5.01	10.17	7.86	6.33	6.27	7.17	4.55	6.47	7.28	6.94	8.8	10.5	5.68	4.86	6.6	6.57	5.75	13.12	12.17	7.14	10.08	6.38	6.48	9.37	7.99
56367	56367	Scoc	21.03	23.53	20.72	21.56	20.86	20.97	33.97	22.78	31.48	19.96	21.38	21.75	22.58	23.24	18.78	20.73	23.6	22.59	23.47	22.54	23.85	24.33	22.23	19.78	20.89	18.87	19.79	23.56	21.99	21.47	32.72	39.61	32.52	36.28	31.79	33.54	58.7	35.88	50.31	33.21	36	33.27	35.44	36.44	28.32	35.33	35.57
320795	320795	Pkn1	22.67	23.1	20.87	22.27	19.47	20.75	30.14	20.98	27.13	25.48	28.91	19.64	23.16	21.3	16.84	26.17	17.29	20.12	20.02	28.55	23.28	25.46	23.76	30.58	25.97	29.67	27.44	22.96	22.71	25.15	35.28	38.89	32.75	37.47	29.67	33.18	52.07	33.04	43.37	42.39	48.68	30.03	36.35	33.39	25.38	44.6	26.07
75657	75657	Speer4a	0	0	0	0.03	0.03	0	0	0	0	0	0	0	0	0	0	0	0	0	0	0	0	0	0	0	0	0	0	0	0	0	0	0	0	0.05	0.05	0	0	0	0	0	0	0	0	0	0	0	0
21402	21402	Skp1a	223.3	142.62	149.7	133.19	194.21	198.36	175.31	186.15	195.99	144.01	122.55	164.82	160.44	181.51	166.06	174.64	183.92	165.07	181.15	207.47	169.12	176.81	188.77	128.82	157.4	198.07	144.9	164.93	144.21	148.34	347.52	240.11	234.98	224.05	295.99	317.28	302.89	293.1	313.26	239.63	206.39	252.09	251.76	284.61	250.34	297.61	277.27
16834	16834	Cog1	10.76	11.15	10.97	11.31	11.23	10.27	12.16	10.97	12.59	10.88	11.21	10.14	10.66	10.58	8.37	16.2	9.17	9.36	9.76	13.09	10.63	14.14	12.1	11.83	12.65	12.85	11.68	11.16	10.49	11.36	16.74	18.78	17.21	19.03	17.11	16.43	21.01	17.28	20.13	18.1	18.88	15.5	16.73	16.6	12.62	27.61	13.83
654818	654818	Smco3	1.17	0.36	0.25	0.06	0.5	0.85	0.77	2	0.78	0.24	0.26	0.61	0.82	0.93	0.62	0.09	0.74	1.01	1.09	1.66	1.58	0.74	0.49	0.78	0.93	0.6	1.09	0.57	0.37	0.7	1.82	0.6	0.4	0.1	0.77	1.35	1.33	3.15	1.25	0.41	0.45	0.94	1.29	1.45	0.93	0.15	1.12
383348	383348	Kctd16	0.03	0.01	0.01	0.02	0.02	0.02	0.02	0.02	0.01	0.03	0.01	0.02	0.01	0.02	0.03	0.04	0.03	0.02	0.02	0.01	0.02	0.03	0.02	0.03	0.03	0.01	0.04	0.02	0.02	0.01	0.05	0.02	0.02	0.03	0.02	0.04	0.04	0.03	0.02	0.05	0.02	0.03	0.02	0.02	0.04	0.06	0.04
72821	72821	Scn2b	1.28	0.49	0.29	0.32	0.97	1.43	3.37	1.94	2.18	0.57	0.39	0.5	1.14	1.79	1.06	0.49	0.78	1.17	1.16	2.08	1.06	0.99	1.71	1.65	1.89	2.03	2.3	0.9	1.44	1.31	1.99	0.83	0.45	0.54	1.48	2.28	5.82	3.06	3.48	0.95	0.65	0.77	1.79	2.8	1.6	0.83	1.17
58237	58237	Nkain4	4.45	2.87	7.58	7.72	4.48	10.58	27.5	3.74	36.81	41.79	7.6	2.57	4.61	1.67	9.78	1.54	6.37	10.66	2.52	0.78	6.94	5.87	3.92	9.19	6.94	8.57	5.58	7.6	13.66	6.01	6.93	4.82	11.9	12.99	6.83	16.93	47.51	5.89	58.84	69.53	12.8	3.93	7.24	2.62	14.74	2.62	9.61
279653	279653	Pcdh19	0.52	1.38	2.09	2.1	0.84	0.83	1.24	0.99	0.59	2.06	1.68	0.75	0.79	0.77	0.51	1.41	0.92	0.81	0.54	0.89	1.02	1.14	0.72	1.63	0.89	0.87	1.33	1.33	1.49	1.12	0.81	2.32	3.28	3.53	1.29	1.32	2.14	1.57	0.94	3.44	2.84	1.15	1.24	1.21	0.77	2.4	1.38
320534	320534	Tmem104	4.96	9.03	6.15	8.52	4.21	5.35	6.61	4.93	5.93	8.12	10.27	6.06	7.57	6.34	5.11	5.72	5.76	7.95	6.59	7.13	8.39	6.31	7.25	11.28	7.64	7.12	8.87	9.04	9.71	10.37	7.71	15.19	9.66	14.33	6.41	8.55	11.41	7.77	9.47	13.51	17.29	9.27	11.88	9.94	7.7	9.74	8.69
67466	67466	Pdcl	10.71	11.16	10.58	10.74	11.14	10.7	12.97	11.3	10.6	11.41	11.51	11.5	11.84	12.69	10.44	12.35	11.9	11.08	11.67	14.87	12.48	13.79	13.57	13.04	10.99	12.88	13.19	12.21	10.99	12.51	16.67	18.8	16.61	18.07	16.97	17.11	22.41	17.79	16.94	18.98	19.39	17.59	18.57	19.91	15.73	21.04	17.94
22409	22409	Wnt10a	0.11	0.51	0.44	0.43	0.85	0.36	0.08	0.02	0.12	0.34	0.19	0.28	0.46	0.09	0.07	0.73	0.47	0.22	0.4	0.14	0.09	0.52	0.78	0.13	0.2	0.09	0.17	0.09	0.35	0.23	0.17	0.86	0.7	0.72	1.3	0.58	0.14	0.03	0.2	0.57	0.32	0.42	0.72	0.15	0.1	1.25	0.71
66482	66482	Exoc2	7.16	7.95	6.96	7.34	6.31	7.31	8.87	7.11	8.15	7.32	8.59	7.07	7.82	7.66	6.11	8.43	6.45	7.01	7.41	8.78	8.27	7.67	10.8	9.39	8.46	8.53	9.99	7.63	7.85	9.71	11.14	13.39	10.92	12.35	9.62	11.69	15.32	11.2	13.03	12.18	14.47	10.81	12.27	12.01	9.22	14.37	9.73
67706	67706	Tmem179b	16.14	20.06	17.08	20.78	15.98	17.47	19.23	15.06	16.38	21.61	23.84	16.59	18.39	16.59	18.44	16.41	15.21	20.07	17.64	23.51	22.24	18.98	19.14	20.39	16.84	23.19	15.82	28.47	20.31	21.29	25.12	33.77	26.81	34.97	24.36	27.95	33.23	23.71	26.19	35.96	40.15	25.38	28.85	26.02	27.79	27.96	22.92
541463	541463	Tex24	0	0.03	0	0	0	0	0	0	0.03	0	0	0	0	0	0	0	0	0	0	0	0	0	0	0	0	0	0	0	0	0	0	0.04	0	0	0	0	0	0	0.05	0	0	0	0	0	0	0	0
171580	171580	Mical1	13.08	21.01	13.65	15.05	9.88	12.8	19.18	13.62	17.36	14.6	17.81	13.72	19.74	14.34	10.92	11.71	11.55	17.5	15.4	20.71	20.53	14.96	19.8	16.85	14.85	16.45	15.36	17.68	16.31	16.21	20.36	35.36	21.43	25.32	15.05	20.48	33.14	21.44	27.74	24.29	29.99	20.98	30.98	22.49	16.46	19.96	17.42
54194	54194	Akap8l	27.91	22.67	24.2	20.76	24.55	21.77	31.36	23.5	29.88	19.67	20.43	24.2	23.8	26.21	23.54	28.87	18.7	17.79	23.66	25.72	23.02	28.66	21.98	23.62	27.69	22.93	24.04	21.87	19.72	22.52	43.44	38.17	37.98	34.92	37.41	34.81	54.19	37	47.77	32.74	34.4	37.02	37.35	41.1	35.49	49.19	28.2
380855	380855	Rsl1	2.72	1.77	1.62	1.9	2.1	2.25	2.3	2.59	1.98	3.02	2.27	1.82	2.53	2.62	1.97	2.52	1.74	1.96	2.22	3.72	2.52	2.32	2.36	3.16	2.72	3.93	2.88	2	2.07	2.62	4.24	2.98	2.54	3.2	3.2	3.6	3.97	4.07	3.16	5.03	3.83	2.78	3.96	4.11	2.96	4.3	2.62
503610	503610	Zdhhc18	20.84	23.9	23.07	25.78	21.5	21.82	24.58	24.37	23.6	25.21	25.52	28.16	35.95	25.09	20.1	24.43	23.36	32.06	29.8	31.14	31.31	25.75	23.2	31.95	24.25	24.67	25.46	26.65	26.61	29.93	32.43	40.23	36.21	43.38	32.76	34.91	42.47	38.36	37.73	41.94	42.98	43.07	56.41	39.34	30.3	41.63	35.22
115489126	115489126	LOC115489126	0.28	0.65	0.66	0.38	0.48	0.28	0.48	0.32	0.22	0.54	0.6	0.18	0.29	0.64	0.85	2.19	0.68	0.28	0.18	0.26	0.21	1.09	0.44	0.76	0.69	0.6	0.85	0.29	0.19	0.51	0.43	1.1	1.04	0.63	0.73	0.45	0.82	0.5	0.36	0.89	1.01	0.28	0.45	1	1.28	3.73	1.03
216131	216131	Trappc10	9.86	11.06	10.13	10.98	10.24	10.76	11.42	10.13	10.19	10.25	9.84	10.69	10.25	9.61	7.69	14.69	10.04	8.98	9.48	9.23	9.06	11.42	11.73	11.33	12.73	10.42	12.25	9.66	10.6	11.63	15.34	18.61	15.9	18.47	15.61	17.21	19.73	15.95	16.29	17.06	16.58	16.34	16.09	15.08	11.59	25.03	15.14
109731	109731	Maob	7.37	11.23	4.78	3.65	6.07	11.37	42.57	6.47	47.19	3.51	2.37	6.92	5.29	7.16	39.65	3.05	6.94	12.6	8.41	3.69	5.04	4.23	4.19	6.73	5.96	7.25	9.99	4.29	14.08	5.14	11.46	18.91	7.5	6.14	9.25	18.18	73.55	10.18	75.43	5.84	4	10.58	8.31	11.22	59.77	5.2	10.47
71941	71941	Cars2	12.36	9.61	11.81	10.05	13.96	12.08	11.78	11.55	14.15	10.07	10.58	12.66	13.02	13.34	11.22	11.08	10.6	9.59	12.69	13.59	11.49	11.4	12.9	11.23	13.68	12.43	10.09	11.57	10.54	9.14	19.24	16.18	18.54	16.9	21.27	19.32	20.35	18.18	22.61	16.76	17.82	19.37	20.44	20.91	16.92	18.89	15.98
17219	17219	Mcm6	24.03	16.65	16.01	19.45	12.21	18.41	16.7	18.53	12.86	23.02	37.9	10.04	20.98	19.7	11.7	12.78	12.74	14.24	15.26	30.32	18.24	17.82	30.39	21.54	16.52	23.75	20.41	19.45	16.99	21.99	37.39	28.02	25.13	32.71	18.61	29.45	28.85	29.18	20.56	38.31	63.83	15.36	32.93	30.9	17.64	21.77	19.2
93725	93725	Ear10	0.09	0	0	0.08	0.09	0	0	0	0	0.09	0	0	0	0	0	0	0	0	0.09	0.09	0	0	0	0	0.08	0.09	0	0	0	0	0.13	0	0	0.14	0.14	0	0	0	0	0.14	0	0	0	0	0	0	0
69126	69126	Rbis	123.8	119.83	98.68	118.08	102.72	120.31	124.74	116.19	130.88	109.28	98.15	106.96	112.23	130.86	103.43	101.94	98.38	100.23	124.89	150.39	124.48	125.23	156.61	97.07	118.56	145.81	94.19	115.77	99.36	127.12	192.67	201.74	154.89	198.64	156.55	192.43	215.52	182.95	209.18	181.84	165.3	163.6	176.11	205.19	155.93	173.72	148.32
226041	226041	Pgm5	26.34	9.94	7.14	10.15	16.45	31.8	163.94	22.76	100.09	6.04	2.73	12.03	28.17	34.55	35.45	21.17	14.78	35.47	19.62	26.44	20.49	29.26	43.09	37.17	32.83	35.36	22.97	13.04	48.97	15.04	40.98	16.73	11.2	17.08	25.07	50.86	283.25	35.84	159.98	10.05	4.6	18.4	44.21	54.18	53.45	36.07	22.28
100043811	100043811	Frg2f12	0	0	0	0.04	0.08	0	0	0	0	0	0	0	0	0	0	0	0	0	0	0	0	0	0	0	0	0	0	0	0	0	0	0	0	0.06	0.13	0	0	0	0	0	0	0	0	0	0	0	0
69481	69481	Actl9	0.3	0.03	0.03	0.13	0.04	0.1	0.16	0.23	0.46	0.07	0.07	0.11	0.21	0.11	0.07	0.18	0.07	0	0.11	0.03	0.18	0.18	0.1	0.1	0.13	0.1	0.13	0.16	0.07	0.06	0.47	0.06	0.05	0.22	0.05	0.16	0.28	0.37	0.73	0.11	0.11	0.16	0.33	0.17	0.1	0.3	0.1
230612	230612	Slc5a9	2.17	0.02	0.01	0	6.34	2.58	0.28	0.97	0.57	0.01	0.01	0.05	0.72	1.83	0.47	0.02	0.25	0.18	0.3	4.56	0.27	0.86	2.19	0.62	0.65	22.79	0.58	0.15	0.35	1.19	3.37	0.03	0.02	0	9.66	4.13	0.48	1.53	0.91	0.02	0.02	0.08	1.13	2.88	0.7	0.03	0.38
20196	20196	S100a13	36.43	53.85	65.53	57.74	48.8	52.17	52.71	44.03	63.18	68.39	50.03	59.53	55.56	46.7	48.02	49.21	70.02	60.94	58.4	50.94	68.12	70.17	44.08	46.54	46.15	38.83	42.29	65.58	49.96	46.1	56.69	90.66	102.86	97.13	74.38	83.45	91.07	69.32	100.98	113.8	84.26	91.06	87.19	73.23	72.4	83.86	105.56
66113	66113	Apoa5	0	0	0	0	0	0	0	0	0	0	0	0	0	0.11	176.31	0	0	0	0	0	0	0	0	0.02	0	0	0	0	0.02	0	0	0	0	0	0	0	0	0	0	0	0	0	0	0.18	265.8	0	0
19328	19328	Rab12	64.43	64.34	67.77	56.6	69.52	67.49	63.57	67.28	82.91	56.31	47.74	75.17	64.31	67.35	46.86	87.45	71.11	65.91	72.82	48.91	63.84	69.15	54.02	45.6	56.89	42.66	50.38	61.51	58.42	50.88	100.27	108.33	106.37	95.21	105.96	107.96	109.84	105.93	132.52	93.7	80.4	114.97	100.92	105.61	70.65	149.03	107.21
69623	69623	Zfp33b	4.32	4.57	4.13	4.62	4.84	4.8	5.14	4.61	4.99	4.38	5.42	3.98	5.32	5.65	4.01	5.4	4.28	3.83	4.35	6.78	5.01	5.49	5.13	4.59	4.97	5.6	4.51	4.52	3.8	4.39	6.73	7.69	6.48	7.78	7.38	7.68	8.88	7.26	7.98	7.29	9.13	6.08	8.35	8.85	6.05	9.2	6.45
18007	18007	Neo1	17.09	15.33	15.46	16.92	15.01	19.14	16.5	14.87	16.09	18.37	18.85	13.7	14.75	14.23	10.5	21.6	15.54	14.37	13.66	21.06	15.78	17.24	15.6	15.61	19.28	19.82	15.9	12.82	14.4	15.88	26.6	25.81	24.27	28.46	22.88	30.61	28.51	23.42	25.71	30.57	31.75	20.96	23.15	22.31	15.83	36.8	23.43
110789	110789	Adgrv1	0.03	0.03	0.01	0.03	0.01	0.02	0.03	0.02	0.01	0.03	0.02	0.01	0.01	0.02	0.07	0.01	0.01	0.01	0.03	0.04	0.02	0.01	0.01	0.01	0.02	0.02	0.02	0.02	0.01	0.01	0.05	0.05	0.02	0.05	0.02	0.04	0.04	0.03	0.02	0.05	0.03	0.01	0.02	0.03	0.1	0.02	0.01
107885	107885	Mthfs	10.68	12.55	11.34	13.06	11.82	10.51	11.02	12.01	9.91	14.92	17.16	17.34	15.27	13.53	21.73	11.87	13.28	17.02	14.51	15.49	18.28	12.84	14.2	16.89	13.94	15.78	12.06	16.29	13.29	14.89	16.62	21.13	17.79	21.97	18.02	16.81	19.04	18.91	15.84	24.82	28.9	26.53	23.97	21.21	32.76	20.22	20.02
387334	387334	Defb50	0	0	0	0	0	0.6	0	0	0.35	0	0	0	0	0	0	0.34	0	0.62	0	0	0	0	0	0	0	0	0	0	0.32	0.29	0	0	0	0	0	0.96	0	0	0.55	0	0	0	0	0	0	0.57	0
78767	78767	Efcab11	0.46	0.72	0.38	0.78	0.58	0.48	0.83	0.66	0.6	0.75	1.2	0.48	1.07	0.85	0.35	0.43	0.49	0.74	0.36	1.19	0.78	0.86	1.36	0.75	0.62	0.76	0.88	0.44	0.41	0.7	0.72	1.21	0.59	1.32	0.88	0.76	1.44	1.03	0.96	1.24	2.02	0.73	1.68	1.33	0.52	0.73	0.73
12229	12229	Btk	2.83	3.29	4.15	5.02	2.32	2.93	3.5	2.58	2.54	5.97	11.8	4.41	5.96	3.54	2.92	3.4	4.62	6.71	4.74	5.37	7.43	3.53	3.79	7.51	5.12	3.59	5.6	6.15	4.48	5.24	4.4	5.53	6.51	8.45	3.53	4.69	6.05	4.06	4.06	9.94	19.87	6.74	9.35	5.55	4.4	5.79	6.97
77305	77305	Wdr82	23.98	18.23	14.94	17.09	18.04	19.64	25.87	21.98	24.28	18.29	20.21	15.74	22.81	26.52	17.67	17.94	16.85	19.06	20.01	31.65	21.99	23.05	27.3	23.31	23.99	26.75	23.57	18.46	20.28	22.3	37.32	30.69	23.45	28.75	27.49	31.42	44.69	34.61	38.8	30.44	34.04	24.08	35.79	41.59	26.64	30.57	25.4
232035	232035	Ccser1	0.3	0.32	0.26	0.27	0.42	0.4	0.48	0.51	0.42	0.37	0.38	0.34	0.44	0.29	0.19	0.41	0.28	0.36	0.34	0.43	0.7	0.54	0.57	0.37	0.33	0.89	0.32	0.36	0.22	0.35	0.46	0.55	0.41	0.46	0.64	0.63	0.82	0.8	0.66	0.61	0.65	0.53	0.69	0.45	0.29	0.71	0.42
434204	434204	Whamm	6.81	5.85	5.49	6.1	5.64	5.33	7.82	6.12	7.23	5.11	5.69	4.94	5.39	6.77	9.94	6.16	4.44	5.09	4.9	7.64	6.68	7.31	6.35	6.18	5.54	7.75	5.23	5.38	5.98	6.39	10.6	9.84	8.62	10.26	8.59	8.53	13.51	9.64	11.55	8.51	9.58	7.56	8.46	10.62	14.98	10.5	6.69
18491	18491	Pappa	0.41	2.74	1.03	1.71	0.42	1.92	0.71	0.36	0.64	2.31	2.02	0.35	0.49	0.42	0.51	0.57	0.49	0.78	0.34	1.18	1.25	0.39	0.75	2.03	1.21	2.22	1.1	0.91	1.83	0.86	0.63	4.61	1.61	2.88	0.64	3.07	1.22	0.57	1.02	3.84	3.41	0.53	0.77	0.65	0.78	0.97	0.74
209232	209232	Wfdc5	0.02	0.2	0.04	0.07	0	0.02	0	0.02	0	0.07	0.05	0	0.04	0	0	0	0.04	0.02	0	0	0.04	0	0.02	0.02	0	0.02	0.02	0	0	0.07	0.03	0.34	0.06	0.12	0	0.03	0	0.03	0	0.12	0.09	0	0.06	0	0	0	0.06
76974	76974	Urah	29.14	0	0	0	35.48	15.67	2.18	11.3	2.49	0	0.17	0.36	2.03	9.54	129.08	0.19	3.03	2.63	3.38	39.36	7.21	5.99	26.47	5.19	5.93	60.07	2.5	0.79	1.22	8.38	45.35	0	0	0	54.07	25.06	3.77	17.79	3.98	0	0.29	0.56	3.19	14.96	194.6	0.32	4.57
22289	22289	Kdm6a	6.61	6.64	4.96	4.94	5.84	5.87	6.88	6.2	5.9	5.21	6.02	4.77	6.47	7.56	5.41	6.68	5.72	5.41	6.6	9	6.38	7.2	7.7	7.7	7.52	10.17	7.8	5.36	5.53	6.79	10.29	11.18	7.78	8.31	8.89	9.39	11.88	9.77	9.43	8.67	10.14	7.3	10.15	11.86	8.15	11.38	8.63
209239	209239	Gan	0.4	1.25	0.62	0.77	0.54	0.51	0.85	0.62	0.96	0.91	0.99	0.37	0.73	0.51	0.43	1.41	0.5	0.61	0.43	0.57	0.88	0.97	0.89	1.47	1.05	1.48	1.45	0.65	0.93	1.08	0.62	2.11	0.97	1.3	0.82	0.81	1.47	0.98	1.53	1.51	1.67	0.56	1.15	0.8	0.65	2.4	0.75
246229	246229	Bivm	4.98	4.54	3.61	4.42	3.28	4.44	5.9	4.51	4.44	4.54	4.3	3.93	4.44	5.43	4.68	4.4	4.21	4.22	4.05	6.64	5.35	5.4	5.12	5.01	4.72	5.72	4.75	4.7	4.31	4.68	7.75	7.64	5.67	7.44	4.99	7.1	10.19	7.11	7.1	7.56	7.25	6.01	6.96	8.51	7.05	7.49	6.35
11595	11595	Acan	0.22	1.42	0.72	1.01	0.72	0.46	0.55	1.3	0.1	1.57	0.5	0.21	0.31	0.51	0.11	1.75	1.07	0.07	0.12	0.26	0.2	1.79	0.56	0.35	0.39	0.42	0.44	0.32	0.28	0.57	0.34	2.4	1.13	1.7	1.1	0.73	0.94	2.05	0.16	2.61	0.84	0.31	0.49	0.8	0.17	2.99	1.61
622307	622307	Albfm1	0.06	0	0	0	0.02	0.02	0.05	0.06	0.09	0	0	0	0.08	0.02	9.42	0	0	0.02	0.02	0.16	0.02	0	0	0	0	0.12	0.02	0.06	0.06	0.04	0.09	0	0	0	0.03	0.04	0.08	0.09	0.14	0	0	0	0.13	0.04	14.21	0	0
320974	320974	Lrrn4	0.77	1.25	3.83	6.33	1.08	2.92	14.73	0.76	11.82	16.95	2.46	0.64	1.33	0.28	4.02	0.76	1.11	3.34	0.33	0	2.19	2.39	1.58	4.55	2.64	4.32	2.52	2.8	7.27	2.14	1.21	2.11	6.01	10.65	1.65	4.67	25.45	1.2	18.9	28.2	4.14	0.98	2.09	0.44	6.06	1.29	1.67
67238	67238	Fam220a	25.25	22.17	27.25	21.47	27.45	24.27	19.03	26.06	24	20.25	17.47	32.78	22.94	24.11	16.65	19.57	28.89	24.82	26.6	12.52	20.13	19.69	20.27	15.47	23.84	12.22	22.23	26.17	24.23	19.65	39.29	37.32	42.78	36.12	41.84	38.82	32.89	41.04	38.37	33.69	29.43	50.14	36	37.8	25.1	33.35	43.56
67207	67207	Lsm1	8.97	7.97	6.53	7.68	7.37	7.49	8.28	7.3	7.69	7.77	7.5	5.84	8.69	7.82	5.49	7.97	6.88	7.34	7.06	9.63	7.33	8.26	7.56	7.36	7.58	8.1	6.99	7.8	6.74	8.8	13.96	13.43	10.25	12.91	11.23	11.99	14.3	11.5	12.29	12.93	12.63	8.93	13.64	12.26	8.27	13.58	10.38
13383	13383	Dlg1	19.18	19.45	15.34	17.16	15.89	17.41	24.29	20.16	21.36	16.45	18.28	16.71	18.22	19.5	18	16.5	17.1	18.36	19.27	23.91	18.24	18.56	20.21	19.85	19.08	20.5	16.27	16.43	19.29	17.87	29.86	32.74	24.07	28.86	24.22	27.85	41.96	31.75	34.14	27.37	30.79	25.56	28.59	30.57	27.13	28.12	25.78
16623	16623	Klk1b1	0	6.62	1.88	11.62	0	0	0	0.06	0	2.77	2.89	0	0	0	0	0.06	0	0	0	0	0	0	0	0.81	0	0	0	3.12	1.48	2.11	0	11.15	2.95	19.55	0	0	0	0.1	0	4.62	4.87	0	0	0	0	0.11	0
101502	101502	Hsd3b7	23.54	30.59	25.67	29.29	22.27	26.58	30.31	21.45	25.04	33.45	35.65	21.83	25.79	23.57	119.25	24.07	22.4	23.54	24.42	39.73	29.01	29.26	25.23	37.66	27.9	34.58	26.61	33.09	30.26	30.76	36.63	51.51	40.29	49.28	33.94	42.52	52.37	33.77	40.02	55.66	60.03	33.39	40.48	36.95	179.77	41.02	33.77
83946	83946	Phip	2.83	3.24	3.23	2.65	2.58	2.8	3.72	3.23	2.7	3.73	3.49	2.79	3.13	3.79	2.94	3.41	3.38	3.22	3	3.36	4.08	3.73	3.58	4.4	4.11	2.89	3.8	2.84	3.99	3.94	4.4	5.45	5.07	4.47	3.94	4.48	6.42	5.08	4.32	6.21	5.87	4.27	4.91	5.95	4.44	5.81	5.1
751864	751864	Gm9733	0.52	0.2	1.19	1.64	0.47	1.31	1.15	1.21	0.94	2.62	0.83	0.75	1.83	0.82	0.4	1.02	0.98	1.41	0.9	1.19	1.59	1.55	0.74	1.9	1.43	0.86	1.93	1.87	0.7	0.99	0.81	0.33	1.87	2.77	0.72	2.09	1.99	1.91	1.49	4.37	1.39	1.15	2.87	1.28	0.6	1.74	1.48
71684	71684	Rbm43	7.35	6.05	6.36	8.54	5.53	6.94	11.71	6.38	10.26	10.17	11.11	6.3	10.49	9.68	7.5	5.09	6.41	7.84	7.83	10.96	10.34	9.1	9.54	8.93	7.66	8.84	7.98	9.69	8.67	6.59	11.44	10.18	9.99	14.36	8.43	11.1	20.23	10.04	16.4	16.92	18.72	9.63	16.46	15.17	11.3	8.68	9.66
69852	69852	Tcf23	10.25	1.67	0.25	0.33	2.28	3.38	9.14	3.61	3.08	0.29	0.38	1.74	10.89	13.96	3.15	0.12	2.58	1.22	3.23	11.47	5.21	6	14.21	2.48	18.56	3.05	18.59	7.2	18.41	2.83	15.95	2.81	0.39	0.55	3.48	5.41	15.8	5.68	4.92	0.49	0.65	2.66	17.09	21.89	4.74	0.21	3.89
56043	56043	Akr1e1	15.6	13.73	13.77	12.13	15.61	13.31	14.73	13.91	15.51	13.95	13.34	14.81	13.99	15.16	17.73	13.83	14.56	13.9	12.79	14.94	14.6	15.7	16.22	11.66	13.73	16.06	12.22	15.18	13.15	12.24	24.28	23.11	21.61	20.4	23.8	21.29	25.46	21.9	24.79	23.22	22.46	22.66	21.96	23.78	26.73	23.57	21.94
17350	17350	Mlh1	5.14	4.68	5	4.03	4.02	4.75	5.51	4.43	5.21	4.73	4.89	4.38	5.17	5.48	4.48	6.94	4.79	4.45	4.35	5.9	5.27	6.75	7.18	5.18	5.19	4.82	5.23	4.15	4.62	5.29	8	7.88	7.85	6.78	6.12	7.6	9.51	6.97	8.32	7.87	8.24	6.7	8.11	8.59	6.76	11.82	7.22
67020	67020	Tmem88	10.31	14.81	10.66	15.84	9.21	10.57	11.45	14.43	16.69	12.97	15.98	11.13	15.97	12.08	10.07	12.3	8.88	13.86	11.65	12.7	17.37	17.98	13.53	16.71	11.97	11.3	13.35	17.77	15.62	17.26	16.04	24.93	16.73	26.65	14.03	16.91	19.78	22.72	26.68	21.57	26.91	17.02	25.05	18.94	15.18	20.97	13.38
27410	27410	Abca3	9.07	6.93	6	6.48	7.99	7.59	10.49	9.31	10.11	8.73	6.67	6.2	8.31	7.72	12.07	7.66	5.48	6.97	6.73	12.86	8.55	9.03	9.06	10.56	8.81	15.87	8.51	7.32	7.88	8.58	14.11	11.66	9.42	10.89	12.18	12.14	18.13	14.67	16.16	14.53	11.23	9.49	13.04	12.1	18.2	13.06	8.26
74035	74035	Nol9	10.08	8.4	7.25	8.06	7.23	7.42	9.66	8.21	6.56	8.43	9.81	6.55	8.98	9.27	6.71	9.65	7.06	6.84	8.48	13.49	8.02	9.78	11.52	9.45	9.3	10.77	9.47	7.92	8.45	10.25	15.69	14.14	11.38	13.55	11.02	11.87	16.69	12.92	10.49	14.02	16.52	10.02	14.1	14.54	10.11	16.45	10.65
13038	13038	Ctsk	140.87	770.8	177.92	318.32	124.87	117.42	126.52	135.01	84.95	251.44	753.95	198.34	304.14	342.8	100.81	171.11	293.87	281.11	273.07	343.46	299.87	234.66	212.19	256.59	191.24	140.73	243.85	355.25	338.63	479.06	219.23	1297.65	279.27	535.5	190.32	187.81	218.6	212.58	135.78	418.38	1269.71	303.37	477.26	537.53	151.98	291.6	443.03
19065	19065	Npy4r	0.05	0.02	0	0	0	0.42	1.16	0.02	0.9	0.13	0.53	0.02	0.17	0.14	0.19	0.02	0.02	1.93	0	0	0.07	0	0.39	0.25	0	0.27	0.02	0.07	0.57	0.09	0.07	0.04	0	0	0	0.67	2.01	0.04	1.45	0.22	0.9	0.04	0.26	0.23	0.28	0.04	0.03
107939	107939	Pom121	9.09	8.88	8.37	8.8	7.9	8.56	11.68	9.18	10.68	8.55	11.04	6.66	9.09	9.72	6.64	10.04	7.22	8.77	8.92	13.85	9.61	10.69	11.03	10.84	9.1	12.38	10.45	8.36	9.22	9.92	14.15	14.95	13.14	14.81	12.04	13.7	20.18	14.46	17.07	14.23	18.58	10.18	14.27	15.25	10.01	17.11	10.89
56809	56809	Gmeb1	4.74	4.5	3.73	4.4	4.02	3.73	4.28	4.18	3.87	4.26	4.63	3.46	4.14	4.28	3.26	4.96	3.05	3.04	3.33	5.75	3.85	4.67	4.98	4.47	4.21	5.73	5.17	3.17	3.79	4.67	7.37	7.58	5.85	7.4	6.12	5.97	7.4	6.58	6.19	7.09	7.8	5.29	6.5	6.71	4.91	8.46	4.6
243862	243862	Psg22	0.03	0	0.05	0.05	0	0	0	0.03	0	0.05	0.02	0	0.03	0.02	0	0	0	0.02	0	0	0	0	0	0	0	0	0	0	0	0.02	0.04	0	0.08	0.08	0	0	0	0.04	0	0.08	0.04	0	0.04	0.04	0	0	0
77569	77569	Limch1	14	21.27	23.63	18.69	28.81	17.4	9.34	18.23	16.56	15.08	12.09	24.91	15.94	16.41	10.87	39.32	23.63	15.35	19.41	1.92	14.69	23.75	14.24	13.69	17.52	4.39	18.11	11.83	15.59	15.45	21.79	35.81	37.1	31.45	43.91	27.82	16.14	28.71	26.46	25.1	20.35	38.11	25.01	25.74	16.39	67.01	35.62
66104	66104	Tceal6	1.16	0.95	0.64	0.57	2.28	0.95	2.24	1.15	2.29	1.28	0.09	0.89	1.12	1.04	0.73	5.1	1.97	0.66	0.82	0.41	0.62	7.41	1.01	0.41	0.44	0.64	0.62	0.4	0.36	1.23	1.8	1.59	1	0.96	3.48	1.51	3.87	1.81	3.66	2.14	0.15	1.36	1.75	1.64	1.1	8.69	2.97
12821	12821	Col17a1	0.19	0.19	0.23	0.3	0.22	0.23	0.3	0.09	0.24	0.24	0.18	0.15	0.11	0.16	0.16	0.27	0.15	0.14	0.18	0.29	0.15	0.29	14.02	0.27	0.26	0.56	0.36	0.2	0.23	0.12	0.29	0.33	0.36	0.51	0.33	0.37	0.52	0.15	0.39	0.4	0.3	0.23	0.17	0.25	0.25	0.47	0.23
97484	97484	Cog8	13.24	12.52	11.77	12.5	12.56	11.97	12.81	11.63	13.04	11.59	13.31	11.43	12.84	12.61	10.51	14	10.88	12.28	10.81	14.76	13.17	14.66	13.37	11.96	12.01	14.27	12.91	14.47	12.34	13.07	20.61	21.07	18.48	21.02	19.14	19.14	22.13	18.32	20.85	19.29	22.42	17.48	20.15	19.77	15.84	23.86	16.4
72361	72361	Ces2g	2.01	1.8	1.84	2.86	2.2	3.08	2.27	2.01	2.87	5.22	3.63	1.74	2.29	2.16	9.98	1.68	2.17	1.68	1.75	1.52	2.22	2.64	7.7	4.73	3.55	2.7	4.08	5.42	3.45	3.93	3.13	3.03	2.89	4.81	3.35	4.92	3.93	3.16	4.59	8.68	6.11	2.66	3.59	3.39	15.04	2.86	3.27
66972	66972	Slc25a23	12.19	6.25	5.88	6.23	9.23	13.21	40.64	10.37	37.08	7.06	5.33	8.81	10.65	12.54	39.5	6.05	7.44	12.52	8.49	8.65	7.63	7.03	12.07	11.54	14.89	13.2	9.48	8.21	15.03	8.08	18.97	10.51	9.23	10.47	14.07	21.14	70.21	16.33	59.26	11.75	8.97	13.48	16.71	19.66	59.55	10.32	11.22
70439	70439	Taf15	99.11	68.67	66.06	71.39	74.72	72.56	96.88	82.47	100.93	67.69	70.46	63.03	76.91	79.57	75.7	53.96	70.02	69.64	84.7	123.61	89.46	103.82	78.97	62.21	62.83	100.36	63.5	67.39	63.77	70.2	154.24	115.6	103.7	120.1	113.88	116.06	167.38	129.86	161.32	112.64	118.65	96.41	120.69	124.76	114.12	91.96	105.56
71903	71903	Ces2f	0.01	0.01	0	0.01	0.01	0.01	0.04	0.01	0.01	0.01	0.03	0	0	0.03	0	0	0	0.01	0.01	0.03	0.01	0.01	0.68	0.01	0.03	0.02	0.02	0.01	0.01	0.01	0.01	0.02	0	0.01	0.01	0.01	0.06	0.01	0.02	0.02	0.05	0	0	0.04	0	0	0
67534	67534	Ttll4	5.36	4.69	4.25	4.46	4.34	4.49	5.77	4.61	4.51	3.69	4.22	4.28	5.41	4.96	3.74	6.46	4.22	3.2	5.77	6.68	4.65	6.27	5.56	5.27	4.8	4.87	5.18	3.43	4.62	5	8.34	7.9	6.67	7.51	6.61	7.19	9.97	7.25	7.22	6.14	7.1	6.55	8.49	7.78	5.64	11.01	6.36
15242	15242	Hhex	7.2	5.7	5.74	6.74	4.61	6.29	7.58	10.82	8.69	8.59	9.88	7.62	9.6	9.4	27.64	6.2	7.44	10.99	11.12	11.23	11.58	9.34	8.71	12.06	9.8	8.84	9.72	7.48	6.25	9.34	11.21	9.6	9	11.34	7.02	10.05	13.09	17.04	13.88	14.3	16.63	11.65	15.06	14.74	41.67	10.57	11.21
102641068	102641068	Gm38529	0.05	0.15	0.05	0.05	0.05	0.05	0.15	0.08	0.06	0.09	0.03	0.17	0.12	0.09	0.02	0.12	0.13	0.02	0.12	0.13	0.1	0.07	0.08	0.1	0.11	0.06	0.06	0.06	0.14	0.08	0.08	0.25	0.08	0.08	0.08	0.08	0.27	0.13	0.09	0.16	0.05	0.27	0.19	0.13	0.02	0.2	0.2
13593	13593	Ebf3	1.36	3.4	4.07	5.1	2.68	2.59	3.13	1.9	2.09	4.71	3.7	3.27	2.67	1.99	1.47	6.5	2.62	2.03	2.16	1.82	2.61	4.8	2.77	4.18	2.63	1.51	3.89	2.77	2.41	2.73	2.12	5.73	6.39	8.58	4.08	4.15	5.41	2.99	3.33	7.84	6.22	5	4.19	3.12	2.21	11.08	3.95
56187	56187	Rabggta	9.48	8.02	9.23	8.19	8.94	8.47	10.44	8.7	9.9	8.62	8.87	8.33	9.08	9.15	11.18	10.82	7.9	8.02	8.76	12.4	9.71	10.76	9.07	9.63	9.69	9.77	9.8	9.13	7.3	8.96	14.75	13.5	14.49	13.78	13.62	13.55	18.04	13.7	15.82	14.34	14.94	12.74	14.25	14.35	16.86	18.44	11.92
20022	20022	Polr2j	84.97	75.02	83.49	72.74	87.37	81.94	75.85	71.14	74.91	76.92	72.26	67.13	63.93	82.68	64.86	93.36	77	71.79	69.32	83.15	68.11	91.59	78.68	67.91	79.59	74.61	69.47	81.16	74.39	71.55	132.23	126.29	131.05	122.36	133.16	131.07	131.05	112.01	119.73	127.99	121.69	102.68	100.33	129.65	97.78	159.09	116.08
216976	216976	Rskr	0.13	0.1	0.14	0.14	0.13	0.09	0.12	0.12	0.1	0.05	0.07	0.18	0.07	0.11	0.11	0.23	0.09	0.04	0.16	0.1	0.09	0.17	0.15	0.08	0.12	0.13	0.07	0.19	0.06	0.11	0.2	0.17	0.22	0.24	0.2	0.14	0.2	0.19	0.16	0.08	0.12	0.27	0.11	0.17	0.17	0.4	0.13
208748	208748	Prrg3	1.9	2.61	2.32	2.79	1.77	2.56	3.09	2.23	2.66	3.94	2.63	2.06	1.7	1.63	1.7	4.53	1.73	2.34	1.62	1.79	2.24	3.82	2.39	3.24	2.4	2.44	2.36	2.41	2.29	2.41	2.95	4.39	3.64	4.69	2.69	4.1	5.34	3.51	4.25	6.56	4.44	3.14	2.67	2.56	2.56	7.72	2.6
20661	20661	Sort1	14.25	9.65	10.13	10.14	16.5	13.97	15.67	12.2	18.26	8.83	7.6	11.83	12.34	13.15	10.1	24.28	13.06	14.81	11.55	14.57	11.21	17.61	13.69	13.85	15.79	19.26	13.6	6.91	12.07	10.6	22.18	16.25	15.89	17.06	25.15	22.35	27.07	19.2	29.19	14.7	12.79	18.09	19.37	20.62	15.23	41.37	19.69
12909	12909	Crcp	16.95	14.79	12.92	12.49	14.65	13.56	16.55	14.2	15.59	13.05	14.34	11.34	12.81	13.34	14.67	14.3	12.97	12.21	11.27	17.12	12.64	16.61	14.78	12.84	13.94	15.33	12.31	14.96	13.31	14.5	26.38	24.9	20.27	21.01	22.33	21.69	28.59	22.36	24.92	21.71	24.16	17.34	20.11	20.92	22.11	24.37	19.55
78923	78923	Chsy3	0.33	1.01	0.94	1.81	0.52	0.82	0.75	0.38	0.4	1.24	1.82	0.44	0.45	0.31	0.94	1.7	0.8	0.7	0.39	0.81	0.81	1.21	0.34	1.31	0.51	0.92	0.57	0.75	0.85	0.91	0.51	1.7	1.47	3.04	0.79	1.31	1.29	0.59	0.64	2.07	3.07	0.68	0.71	0.48	1.41	2.91	1.2
69277	69277	3300002I08Rik	15.65	13.1	15.08	13.26	17.77	15.26	10.21	12.68	13.76	8.19	9.83	22.38	14.57	14.02	11.66	9.28	19.87	13.7	15.69	11.49	15.35	10.77	12.85	10.68	17.78	13.01	15.2	10.9	10.98	10.05	24.36	22.05	23.67	22.3	27.08	24.42	17.63	19.96	21.99	13.63	16.55	34.24	22.87	21.98	17.58	15.82	29.95
57258	57258	Xpo4	2.95	3.65	3.42	3.66	3.22	3.35	4.59	3.5	3.58	3.1	3.67	3.88	3.51	4.04	2.77	6.24	4.1	3.32	4.52	3.43	2.99	4.56	4.59	3.81	4.07	3.02	4.61	2.85	3.49	4.05	4.59	6.15	5.37	6.15	4.91	5.36	7.94	5.51	5.72	5.16	6.19	5.94	5.5	6.33	4.18	10.63	6.18
30056	30056	Timm9	19.53	16.92	18.71	18.37	26.47	21.78	21.9	22.47	21.99	19.09	18.68	20.47	23.49	23.41	21.07	25.7	23.61	18.03	23.22	19.13	18.89	25.36	24.06	15.49	18.55	15.3	18.61	22.3	17.68	18.65	30.39	28.48	29.37	30.9	40.34	34.84	37.85	35.39	35.15	31.76	31.45	31.32	36.87	36.71	31.77	43.8	35.59
17684	17684	Cited2	26.89	42.24	39.03	34.71	38.93	28.41	20.1	28.69	22.6	29.21	40.17	37.55	22.3	28.8	24.02	36.27	30.01	23.7	24.76	22.17	22.99	29.48	19.89	25.33	35.21	26.75	29.65	30.74	25.53	25.48	41.85	71.11	61.26	58.39	59.33	45.43	34.73	45.17	36.12	48.6	67.66	57.44	34.99	45.16	36.21	61.81	45.24
11552	11552	Adra2b	0.15	0.22	0.16	0.45	0.29	0.42	2.1	0.19	2.18	0.22	0.13	0.09	0.12	0.07	0.97	0.3	0.17	0.22	0.05	0.04	0.12	0.21	0.18	0.23	0.16	0.18	0.26	0.2	0.34	0.15	0.23	0.37	0.25	0.76	0.44	0.67	3.63	0.29	3.49	0.37	0.23	0.14	0.19	0.11	1.46	0.51	0.26
226169	226169	Pprc1	7.81	9.22	8.03	8.65	5.72	7.55	10.48	7.78	7.31	9.2	11.8	5.97	9.39	8.17	5.12	8.51	5.72	6.76	7.67	12.07	7.23	9.45	10.77	11.83	7.9	11.14	9.87	8	9.12	11.53	12.15	15.52	12.61	14.55	8.72	12.08	18.1	12.24	11.68	15.31	19.87	9.14	14.74	12.8	7.71	14.51	8.62
241289	241289	Ppp1r26	1.45	0.75	0.46	0.49	0.66	0.81	1.54	0.97	1.27	0.48	0.42	0.76	0.84	1.22	0.59	1.31	0.67	0.7	0.93	1.16	0.76	1.17	1.31	0.92	1.2	0.98	1.06	0.56	0.78	0.78	2.25	1.26	0.72	0.83	1.01	1.29	2.66	1.52	2.02	0.8	0.71	1.16	1.32	1.92	0.89	2.24	1
22248	22248	Unc119	15.75	10.62	12.44	11.26	13.81	16.62	29.71	17.65	28.05	14.83	15.37	15.43	19.72	14.64	17.65	11.36	13.52	18.49	15.97	23.01	18.2	15.22	14.07	19.01	15.18	19.95	14.01	15.21	18.55	14.81	24.51	17.87	19.52	18.94	21.05	26.58	51.33	27.78	44.83	24.68	25.88	23.6	30.94	22.96	26.61	19.36	20.39
242603	242603	Cdcp2	0.06	0.01	0	0	0.05	0.01	0.05	0.01	0	0	0.02	0	0.02	0.02	0	0.02	0.01	0	0	0.02	0.02	0	0.01	0	0	0.05	0.02	0	0	0.01	0.09	0.02	0	0	0.07	0.02	0.09	0.02	0	0	0.04	0	0.03	0.03	0	0.04	0.02
75772	75772	Pnpla5	0.05	0.03	0.04	0	0.06	0	0	0	0	0	0.03	0	0	0	0.14	0	0	0	0	0	0	0	0	0.02	0.08	0.03	0.08	0.03	0.03	0.03	0.08	0.04	0.06	0	0.09	0	0	0	0	0	0.04	0	0	0	0.21	0	0
16149	16149	Cd74	366.99	141.57	281.32	323.69	248.71	278.15	326.42	115.39	234.29	355.75	254.4	229.19	234.57	113.2	184.23	336.31	314.46	344.8	242.29	227.5	218.13	264.04	165.43	382.47	313.99	253.51	266.16	372.3	207.22	239.8	571.14	238.33	441.58	544.53	379.06	444.91	563.98	181.69	374.48	591.96	428.43	350.56	368.09	177.51	277.75	573.12	474.07
66755	66755	4933415F23Rik	0.05	0	0.07	0.02	0.15	0.02	0	0	0.08	0.22	0	0.08	0.03	0.05	0.03	0	0.27	0.02	0	0	0.05	0	0	0	0.1	0.02	0.05	0.14	0.05	0	0.08	0	0.12	0.04	0.24	0.04	0	0	0.13	0.36	0	0.12	0.04	0.08	0.04	0	0.41
67914	67914	Coq9	75.93	55.33	93.88	69.54	97.65	78.96	34.05	75.58	60.34	63.45	46.04	99.47	64.6	72.48	69.5	84.14	90.63	66.72	71.43	16.75	54.86	63.29	61.67	41.17	80.54	24.42	76.31	74.94	63.51	50.28	118.17	93.15	147.36	116.99	148.83	126.3	58.83	119.01	96.44	105.57	77.54	152.14	101.36	113.66	104.78	143.38	136.64
20163	20163	Rsu1	45.49	56.85	40.98	53.71	37.46	51.25	107.47	51.89	73.33	57.97	56.49	40.23	62.18	60.56	49.17	46.71	39.5	55.62	45.83	64.99	55.44	56.13	67.63	65.72	51.74	61.41	50.45	53.04	67.14	56.45	70.8	95.71	64.33	90.36	57.09	81.97	185.68	81.71	117.21	96.46	95.13	61.53	97.57	94.97	74.13	79.61	59.55
70604	70604	Dnajb14	6.72	6.88	6.19	6.8	6.03	6.1	8.31	5.87	6.65	7	9.74	5.9	7.35	6.71	6.1	7.89	7.25	6.74	7.48	9.12	8.01	7.48	8.28	9.17	7.71	7.38	7.98	6.95	6.73	7.67	10.46	11.58	9.72	11.44	9.19	9.76	14.36	9.25	10.63	11.65	16.4	9.02	11.53	10.52	9.2	13.44	10.93
99662	99662	Eps8l3	0	0.02	0	0	0	0	0	0	0.02	0	0	0	0	0.02	0.04	0.02	0.02	0	0.02	0.02	0	0	0.02	0	0.04	0	0	0	0	0	0	0.03	0	0	0	0	0	0	0.03	0	0	0	0	0.03	0.06	0.03	0.03
84505	84505	Setdb1	10.79	10.24	9.59	10.22	9.48	9.49	11.56	9.55	10.37	10.04	12.45	9.02	12.66	11.53	8.8	13.19	9.77	8.73	10.95	14.75	11.47	13.64	12.96	12.74	11.63	13.43	12.79	10.03	10.14	10.99	16.79	17.24	15.05	17.19	14.45	15.18	19.97	15.03	16.57	16.71	20.96	13.79	19.87	18.08	13.27	22.47	14.73
76668	76668	Mdh1b	0	0	0	0	0	0.02	0	0	0	0	0	0	0	0.03	0.05	0.03	0	0	0	0	0	0	0	0	0.03	0.03	0	0	0	0	0	0	0	0	0	0.04	0	0	0	0	0	0	0	0.04	0.08	0.05	0
229877	229877	Rap1gds1	21.85	24.36	20.31	22.61	17.94	20.7	23.62	22.31	22.97	25.26	24.74	20.18	21.57	20.71	17.5	25.87	19.41	21.98	20.87	28.63	21.84	24.72	21.25	26.63	20.43	23.74	21.76	22.74	22.77	24.03	34.01	41.01	31.87	38.03	27.35	33.1	40.81	35.13	36.71	42.02	41.67	30.86	33.85	32.48	26.39	44.08	29.26
13641	13641	Efnb1	17.07	16.19	14.07	16.32	11.68	16.47	17.78	17.27	14.94	29.18	28.67	10.5	15.21	11.56	13.23	11.67	12.18	15.51	12.14	26.73	18.5	15.16	15.51	21.31	17.06	19.41	17.44	14.92	15.14	18.21	26.56	27.26	22.09	27.46	17.81	26.34	30.73	27.19	23.88	48.56	48.29	16.05	23.87	18.13	19.95	19.89	18.37
109697	109697	Cpa1	0	0	0.09	0.05	0	0.05	0.07	0.11	0.1	0.08	0.3	0.09	0.06	0.15	0	0.06	0.03	0.03	0.06	0.18	0.12	0.03	0.06	0.03	0.11	0.06	0.03	0.06	0.06	0.05	0	0	0.13	0.09	0	0.09	0.12	0.18	0.15	0.14	0.51	0.14	0.09	0.23	0	0.1	0.04
66787	66787	Gskip	9.79	9.92	8.57	10.09	8.49	8.81	10.63	9.98	9.64	10.03	10.73	8.61	10.05	10.56	6.58	9.79	9.8	9.81	11.1	13.45	10.59	11.72	9.88	10.43	9.41	11.37	9.79	11.27	9.74	10.18	15.24	16.7	13.45	16.97	12.93	14.09	18.37	15.71	15.41	16.69	18.08	13.17	15.77	16.55	9.93	16.69	14.77
63955	63955	Cables1	3.25	2.23	2.18	2.3	2.2	2.66	3.26	3.51	3.18	4.2	2.58	1.99	2.88	3.3	3.21	1.83	1.83	2.06	2.29	4.16	2.68	3.03	2.21	2.54	2.46	3.8	1.82	2.23	2.64	1.97	5.06	3.76	3.42	3.87	3.36	4.26	5.64	5.53	5.08	6.98	4.34	3.05	4.52	5.17	4.84	3.12	2.76
68051	68051	Nutf2	56.86	47.95	50.22	45.35	53.47	50.71	48.82	49.95	50.91	45.02	43.22	48.57	49.68	50.4	36.77	49.91	47.58	47.37	49.29	46.86	47.96	51.55	51.36	39.79	46.69	39.97	44.28	48	41.06	47.83	88.49	80.73	78.83	76.29	81.49	81.12	84.35	78.64	81.37	74.91	72.79	74.3	77.96	79.02	55.43	85.05	71.72
76375	76375	Det1	7.34	6.96	7.5	5.88	8.76	7.57	5.27	7.83	6.69	6.41	6.06	9.35	8.34	8.36	5.95	6.63	7.37	7.53	9.35	5.85	7.24	6.41	7.31	5.5	7.28	4.89	7.49	5.84	6.41	6.62	11.43	11.71	11.77	9.89	13.35	12.11	9.11	12.32	10.69	10.67	10.2	14.3	13.08	13.11	8.97	11.29	11.11
626316	626316	Zfp987	0.12	0.01	0	0.03	0.03	0	0.06	0.03	0	0	0	0	0.18	0.26	0.08	0	0.08	0.05	0.2	0.27	0.11	0.25	0.06	0	0.05	0.2	0	0	0.01	0.07	0.19	0.02	0	0.05	0.05	0	0.11	0.05	0	0	0	0	0.29	0.41	0.12	0	0.12
380997	380997	Cyp2d12	0	0	0	0	0	0	0	0	0	0	0	0	0	0	0.89	0	0	0	0	0	0	0	0	0	0	0	0	0	0	0	0	0	0	0	0	0	0	0	0	0	0	0	0	0	1.35	0	0
268949	268949	Mucl3	0.19	0.06	0.02	0.04	0.07	0.06	0.36	0.14	0.19	0.06	0.02	0.07	0.2	0.16	0.09	0	0.09	0.11	0.02	0.11	0.02	0.11	0.22	0.06	0.19	0.15	0.11	0.08	0.11	0.1	0.3	0.11	0.03	0.07	0.1	0.1	0.62	0.22	0.31	0.1	0.04	0.1	0.32	0.25	0.13	0	0.13
218544	218544	Sgtb	1	1.28	0.67	1.17	0.78	0.87	1.72	1.06	1.63	1.25	1.63	0.58	0.83	1.1	1.11	1.15	0.78	0.82	0.82	1.16	0.98	0.81	1.09	1.69	1.44	1.57	1.08	1.07	1.52	1.23	1.55	2.16	1.06	1.96	1.19	1.39	2.98	1.67	2.61	2.07	2.74	0.89	1.3	1.72	1.68	1.95	1.18
494124	494124	Calm5	0	0.13	0	0	0	0	0	0	0	0	0	0.13	0	0	0	0	0	0.13	0.14	0.13	0	0	0	0.13	0	0	0	0	0	0	0	0.22	0	0	0	0	0	0	0	0	0	0.2	0	0	0	0	0
76088	76088	Dock8	2.64	3.37	3.93	5.05	2.2	2.65	3.32	2.41	1.92	6.07	8.99	3.09	3.97	3.1	4.54	3.34	2.8	4.35	3.73	4.57	4.78	3.2	3.83	6.24	4.3	5.05	4.79	4.67	4.06	5.39	4.11	5.68	6.18	8.49	3.36	4.24	5.74	3.79	3.07	10.1	15.13	4.72	6.23	4.86	6.85	5.69	4.23
67956	67956	Kmt5a	45.02	38.14	40.86	36.68	41.61	40.58	42.68	42.95	35.84	36.63	41.96	42.36	49.75	47.33	36.4	39.81	38.86	41.65	52.77	44.27	41.29	41.47	53.11	41.44	39.04	42.9	43.96	46.53	47.88	42.92	70.06	64.2	64.14	61.7	63.42	64.91	73.74	67.63	57.29	60.95	70.66	64.78	78.07	74.21	54.87	67.85	58.59
27219	27219	Sgk2	0.03	0.06	0.03	0.06	0.04	0.03	0.03	0.07	0.1	0	0.03	0	0.02	0	8.29	0.11	0.03	0.03	0.06	0.09	0.06	0.11	0.09	0.02	0.03	0.09	0.02	0.03	0.03	0.03	0.04	0.1	0.05	0.09	0.05	0.05	0.06	0.11	0.16	0	0.05	0	0.03	0	12.5	0.18	0.05
271711	271711	Tmem169	0.1	0.19	0.13	0.25	0.17	0.12	0.66	0.16	0.62	0.09	0.1	0.09	0.15	0.15	0.13	0.23	0.22	0.15	0.14	0.1	0.25	0.28	0.16	0.16	0.15	0.17	0.19	0.01	0.12	0.15	0.16	0.32	0.21	0.42	0.26	0.19	1.14	0.25	0.99	0.15	0.18	0.13	0.24	0.24	0.2	0.39	0.33
110891	110891	Slc8a2	1.75	0.21	0.2	0.25	0.86	1.61	8.01	1.89	8.58	0.24	0.18	0.5	1.74	3.32	1.67	0.2	0.8	2.3	0.71	1.12	1.11	0.92	3.52	1.64	2.11	1.79	1.78	0.66	2.76	1.02	2.72	0.36	0.31	0.42	1.32	2.58	13.84	2.98	13.71	0.4	0.3	0.77	2.73	5.2	2.51	0.34	1.2
109637	109637	Upk1a	0.36	0.25	0.11	0.31	0.48	0.41	0.63	0.35	0.57	0.21	0.42	0.34	0.22	0.3	0.15	0.41	0.25	0.04	0.38	0.77	0.27	0.31	1.49	0.47	0.25	0.21	0.46	0.31	0.36	0.34	0.56	0.43	0.17	0.52	0.74	0.66	1.1	0.55	0.91	0.35	0.7	0.51	0.35	0.47	0.22	0.7	0.38
63873	63873	Trpv4	4.28	2.24	2.54	2.67	4.48	4.39	3.02	3.71	3.71	4.08	3.18	1.97	3.81	4.3	2.5	1.75	2.13	2.38	2.72	11.39	3.52	3.9	4.77	4.49	3.38	12.22	3.79	3.84	3.23	3.7	6.65	3.78	3.99	4.49	6.83	7.02	5.21	5.84	5.93	6.78	5.35	3.01	5.97	6.74	3.77	2.99	3.22
231151	231151	Tada2b	6.11	5.86	5.21	5.54	4.82	5.73	8.52	5.32	6.71	5.02	6.16	4.87	6.31	6.03	5.12	6.2	5.45	5.2	5.7	6.89	5	6.06	6.77	5.99	5.91	6.47	6.4	5.5	6.09	6.33	9.51	9.86	8.18	9.32	7.35	9.17	14.72	8.37	10.72	8.35	10.38	7.45	9.9	9.46	7.73	10.57	8.21
11475	11475	Acta2	830.91	778.97	224.13	306.47	308.86	707.71	3335.82	758.62	2510.92	329.62	401.48	252.92	1086.26	1263.01	957.7	283.12	305.32	1041.02	334.03	981.62	628.84	607.23	1832.3	1042.71	702.46	1227.67	594.32	562.75	1612.48	476.28	1293.11	1311.4	351.8	515.57	470.73	1131.99	5763.56	1194.49	4013.31	548.48	676.13	386.85	1704.58	1980.46	1443.8	482.48	460.29
100503240	100503240	Trpc5os	0	0	0	0.01	0	0	0	0	0	0.02	0	0.01	0	0	0.01	0.01	0	0	0	0.01	0.02	0	0.01	0.01	0.01	0.01	0.01	0.01	0.01	0	0	0	0	0.02	0	0	0	0	0	0.04	0	0.02	0	0	0.02	0.02	0
19354	19354	Rac2	14.15	9.57	14.51	16.49	10.16	11.32	11.39	9.51	8.43	20.78	26.99	18.69	23.34	12.34	10.56	8.9	17.46	25.46	20.34	19.01	22.85	11.25	14.73	24.62	21.29	15.07	18.7	20.93	13.63	21.22	22.02	16.12	22.78	27.73	15.49	18.11	19.69	14.97	13.47	34.58	45.45	28.58	36.63	19.36	15.92	15.17	26.32
381921	381921	Taok2	18.02	20.41	17.11	21.03	16.39	17.91	26.31	20.17	23.16	19.87	21.37	14.99	21.55	22.71	16.32	22.89	14.45	14.16	17.12	25.26	21.04	24.08	23.38	26.69	23.88	26.27	24.48	19.94	20.69	23.9	28.04	34.36	26.85	35.37	24.97	28.65	45.45	31.76	37.02	33.07	35.99	22.93	33.81	35.61	24.61	39.01	21.78
102637806	102637806	LOC102637806	0.04	0.28	0.2	0.16	0.04	0.08	0	0.04	0.18	0.12	0.35	0	0.21	0.04	0.08	0.04	0.12	0.2	0.04	0.08	0.04	0.09	0.04	0.2	0	0.2	0.12	0.16	0.12	0.11	0.06	0.48	0.32	0.26	0.06	0.12	0	0.06	0.29	0.19	0.59	0	0.33	0.07	0.12	0.07	0.18
16772	16772	Lama1	3.88	2.39	0.4	0.33	0.81	3.18	2.47	3.32	2.21	0.73	2.47	0.78	2.17	2.68	1.92	0.18	0.93	2.33	2.21	6.2	2.73	1.34	1.67	5.37	2.62	6.21	2.3	1.99	2.31	2.52	6.04	4.02	0.63	0.56	1.24	5.09	4.27	5.23	3.53	1.21	4.16	1.2	3.4	4.2	2.9	0.31	1.4
333315	333315	Frem3	0.01	0	0	0	0	0	0.03	0	0.01	0	0.01	0	0	0	0	0.01	0	0.01	0	0.01	0.01	0	0.01	0.01	0	0.03	0.01	0	0.01	0.01	0.01	0	0	0	0	0	0.05	0	0.02	0	0.01	0	0	0	0	0.01	0
69104	69104	March5	43.55	44.12	44.13	41.66	46.32	44.89	43.02	48.13	43.5	41.69	47.93	48.24	45.19	50.42	49.12	53.21	43.71	43.85	48.37	52.13	46.49	47.62	44.87	42.67	45.98	41.21	44.08	46.05	41.63	39.81	67.78	74.27	69.27	70.08	70.59	71.8	74.33	75.78	69.53	69.36	80.72	73.78	70.92	79.06	74.06	90.68	65.9
30945	30945	Rnf19a	9.68	13.45	8.05	10.28	8.56	9.09	13.7	9.62	9.7	10.14	9.46	7.58	10.17	10.23	8.35	10.51	7.22	8.76	8.93	13.82	9.12	9.42	13.67	11.83	10.47	15.85	10.76	10.61	11.21	13.07	15.06	22.64	12.63	17.29	13.05	14.53	23.67	15.14	15.51	16.87	15.93	11.59	15.95	16.04	12.58	17.91	10.89
226421	226421	Rab7b	5.55	8.63	7.98	9.78	4.95	5.73	6.81	5.52	4.14	10.56	12.74	9.8	13.36	8.34	6.33	6.33	7.67	12.64	12.35	11.51	13.54	7.81	11.62	15.72	11.4	10.69	13.28	11.99	10.18	14.6	8.64	14.52	12.53	16.45	7.54	9.17	11.77	8.69	6.61	17.57	21.46	15	20.96	13.07	9.55	10.8	11.57
75612	75612	Gns	65.38	99.69	50.76	69.94	49.09	54.06	57.56	54.3	44.48	73.71	92.68	50.47	66.1	64.04	59.52	64.01	52.38	70.02	65	101.31	77.03	63.94	64.64	95.56	75.51	83.15	76.13	76.95	80.41	85.35	101.75	167.82	79.68	117.65	74.82	86.47	99.45	85.5	71.09	122.65	156.09	77.2	103.72	100.41	89.73	109.08	78.97
231858	231858	Radil	1.52	0.83	1.03	1.04	1.15	1.83	1.4	1.79	1.17	1.27	0.56	0.79	1.89	1.81	0.99	0.92	0.78	1.16	1.67	2.24	1.07	1.53	2.22	1.38	1.68	1.55	1.94	0.89	0.97	2.59	2.36	1.39	1.61	1.74	1.76	2.93	2.43	2.82	1.86	2.12	0.94	1.21	2.97	2.84	1.48	1.56	1.18
328019	328019	Spata32	0	0	0	0	0	0	0	0	0	0	0.04	0.04	0.05	0	0	0	0.09	0	0	0	0	0.05	0	0.04	0	0.04	0	0	0	0.04	0	0	0	0	0	0	0	0	0	0	0.07	0.06	0.07	0	0	0	0.13
328401	328401	Rnase9	0.04	0	0	0	0	0	0	0	0	0	0	0	0	0	0	0	0	0	0	0	0	0	0.09	0	0	0	0.04	0	0	0	0.07	0	0	0	0	0	0	0	0	0	0	0	0	0	0	0	0
319455	319455	Pld5	0.8	0.35	0.87	0.55	1.24	0.54	0.58	0.57	0.72	0.29	0.27	0.79	0.8	1.03	0.65	0.44	0.93	0.68	1.07	0.08	0.39	0.65	0.42	0.39	0.45	0.12	0.47	0.23	0.47	0.3	1.25	0.58	1.37	0.92	1.9	0.86	0.99	0.9	1.14	0.49	0.46	1.21	1.25	1.61	0.97	0.75	1.4
68566	68566	Caly	0.08	0.08	0.11	0.07	0.2	0.45	2.6	0.11	3.01	0.04	0.15	0.12	0.05	0.08	0.46	0.04	0.12	0.55	0.2	0	0.11	0.09	0.08	0.26	0.19	0.19	0.08	0	0.29	0.15	0.12	0.13	0.17	0.12	0.31	0.72	4.49	0.18	4.81	0.06	0.26	0.18	0.08	0.13	0.69	0.07	0.18
74407	74407	Ttc25	0.14	0.36	0.24	0.11	0.26	0.21	0.3	0.24	0.25	0.22	0.19	0.19	0.15	0.18	0.2	0.44	0.24	0.15	0.13	0.09	0.28	0.52	0.12	0.14	0.18	0.22	0.24	0.35	0.26	0.12	0.23	0.6	0.38	0.19	0.39	0.34	0.52	0.38	0.4	0.37	0.32	0.29	0.24	0.29	0.3	0.75	0.36
18761	18761	Prkcq	13.69	11.93	22.17	14.17	23.18	15.03	14.67	11.92	22.69	13.61	8.19	23.17	11.58	13.11	9.81	42.1	20.01	15.02	16.73	0.35	9.33	30.24	8.97	7.01	14.03	2.84	12.64	11.63	12.02	9.25	21.3	20.09	34.8	23.83	35.33	24.04	25.35	18.76	36.27	22.65	13.8	35.44	18.17	20.55	14.79	71.74	30.16
226182	226182	Taf5	2.29	1.72	1.84	2.29	1.58	1.83	2.45	2.04	2.75	1.89	2.3	1.67	2.36	2.07	1.97	2.25	1.48	1.9	1.89	2.67	2.02	1.87	2.5	2.1	1.92	2.28	2	1.88	2.06	2.35	3.57	2.9	2.89	3.86	2.41	2.93	4.23	3.22	4.4	3.14	3.87	2.56	3.7	3.25	2.98	3.84	2.24
18994	18994	Pou3f4	0.02	0.02	0	0	0.03	0.01	0.07	0.01	0.1	0	0.01	0	0	0.02	0.02	0	0	0.01	0	0.01	0	0.01	0	0.02	0.01	0.03	0.02	0	0.03	0	0.03	0.03	0	0	0.04	0.01	0.12	0.01	0.17	0	0.01	0	0	0.03	0.03	0	0
16561	16561	Kif1b	41.9	40.61	56.93	46.76	60.04	48.42	28.86	54.09	41.61	41.08	31.65	79.18	47.04	44	35.11	47.12	67.87	49.91	54.79	12.57	39.07	41	44.86	33.43	53.24	18.16	58.35	38.71	42.84	38.68	65.21	68.37	89.36	78.66	91.5	77.44	49.86	85.17	66.5	68.35	53.3	121.11	73.82	68.99	52.93	80.31	102.31
26920	26920	Cntrl	4.98	4.88	4.56	4.92	4.44	4.32	5.76	4.63	4.88	4.4	6.28	4.16	5.28	5.56	4.19	5.11	3.56	3.7	5.09	5.76	5.57	5.21	5.96	5.93	6.07	5.69	5.41	3.65	3.84	4.76	7.75	8.22	7.16	8.28	6.77	6.91	9.95	7.28	7.8	7.32	10.57	6.37	8.29	8.71	6.32	8.71	5.37
22364	22364	Vpreb3	0.71	1.05	0.19	0.31	0.32	0.68	0.27	0	0.39	0.61	0.29	0.47	0.24	0.15	0.22	0.17	0.72	0.11	0.12	0	0	0.08	0.24	0.41	0.3	0.23	0	0.6	0.48	0.43	1.11	1.77	0.29	0.52	0.49	1.08	0.47	0	0.62	1.01	0.48	0.72	0.37	0.24	0.34	0.28	1.08
67507	67507	1700019N19Rik	0.06	0	0	0	0	0	0.07	0	0	0	0.06	0	0.18	0.24	0	0.12	0	0	0.18	0.06	0.06	0.06	0.46	0.06	0	0	0.06	0.16	0	0	0.09	0	0	0	0	0	0.12	0	0	0	0.09	0	0.28	0.37	0	0.2	0
56524	56524	Mpp6	27.57	23.57	35.85	28.33	30.52	26.52	17.09	28.64	24.46	34.21	27.39	37.13	26.45	27.46	31.19	39.18	31.56	27.5	30.71	13.84	25.73	28.96	24.86	21.71	26.84	20.45	26	25.98	26.14	23.56	42.91	39.68	56.27	47.66	46.52	42.42	29.53	45.1	39.09	56.93	46.12	56.79	41.51	43.05	47.02	66.77	47.58
67223	67223	Rrp15	16.15	14.09	11.98	14.17	12.13	13.29	15.76	13.71	11.39	14.92	15.91	11.1	13.22	16.23	12.03	13.53	11.37	12	12.29	17.14	13.56	16.02	20.32	14.07	13.24	16.43	16.21	17.81	15.79	17.26	25.13	23.73	18.8	23.83	18.49	21.26	27.23	21.59	18.2	24.83	26.79	16.98	20.75	25.45	18.14	23.06	17.14
234839	234839	Piezo1	33.92	47.35	37.98	38.24	38.69	33.72	38.19	38.41	36.28	40.53	48.01	30.82	40.35	39.93	23.88	34.59	29.56	31.17	32.7	44.61	40.73	42.5	39.08	45.34	37.04	45.34	41.8	37.38	39.64	40.82	52.78	79.72	59.61	64.33	58.98	53.94	65.98	60.48	57.99	67.45	80.85	47.15	63.32	62.61	36	58.95	44.56
14359	14359	Fxr1	103.47	98.28	127.78	107.38	136.79	106.13	53.07	118.82	85.9	87.88	72.07	150.01	94.35	100.42	76.25	160.21	144.48	108.07	114.87	44.45	84.25	119.35	93.99	67.05	104.94	44.95	100.74	94.83	90.36	87.6	161.03	165.45	200.57	180.63	208.48	169.75	91.69	187.09	137.3	146.23	121.38	229.45	148.06	157.47	114.95	273.01	217.81
218490	218490	Btf3	491.43	427.06	404.18	390	513.95	446.85	481.57	474.09	497.53	401.74	468.37	448.37	466.7	497.8	376.47	434.39	469.38	467.31	512.32	569.42	512.47	570.19	480.79	383.73	389.47	471.22	348.53	438.18	376.93	422.63	764.79	718.96	634.43	656.07	783.31	714.74	832.05	746.48	795.23	668.48	788.78	685.79	732.35	780.58	567.56	740.26	707.62
22145	22145	Tuba4a	212.64	174.79	204.7	123.36	272.35	226.88	82.01	238.22	161.42	121.47	129.49	284.79	197.38	190.01	169.51	157.81	216.97	196.78	226.51	39.05	170.85	65.87	138.79	102.01	197.69	50.57	123.86	149.42	187.07	118.36	330.93	294.27	321.31	207.52	415.09	362.9	141.69	375.1	258	202.13	218.07	435.59	309.73	297.94	255.55	268.93	327.09
66890	66890	Lman2	44.25	48.42	35.55	43.27	38.65	40.54	37.94	36.13	35.65	45.49	48.18	33.13	39.73	36.71	40.84	41.31	34.14	38.84	34.62	52.52	38.94	42.14	43.71	42.66	40.47	51.62	41.04	44.62	44.54	47.16	68.87	81.52	55.81	72.79	58.91	64.84	65.55	56.89	56.98	75.7	81.14	50.67	62.35	57.56	61.58	70.4	51.47
140482	140482	Zfp358	20.58	17.03	16.62	14.27	19.27	18.78	19.07	21.31	21.06	14.84	14.18	17.74	17.67	20.38	15.25	18	16.54	16.55	18.67	18.34	18.25	19.15	14.47	14.29	17.46	16.53	14.64	15.21	15.63	13.55	32.03	28.67	26.09	24.01	29.38	30.03	32.94	33.56	33.66	24.7	23.88	27.14	27.72	31.96	22.98	30.67	24.93
22115	22115	Tssk2	0.03	0	0.03	0	0	0	0	0.03	0	0	0	0	0.03	0	0	0	0	0	0	0	0	0	0	0	0	0	0	0	0	0	0.05	0	0.05	0	0	0	0	0.05	0	0	0	0	0.05	0	0	0	0
78100	78100	Msantd4	20.96	20.62	15.94	17.22	18.27	18.25	23.51	21.26	23.73	17.1	17.35	17.47	20.2	20.17	15.82	19.17	20.9	20.64	20.24	21.88	20.58	21.41	21.63	18.28	19.01	17.28	17.88	19.85	20.12	17.49	32.61	34.72	25.02	28.96	27.85	29.19	40.61	33.48	37.93	28.45	29.22	26.72	31.7	31.63	23.84	32.67	31.5
68106	68106	Nt5c3b	19.28	13.65	11.76	15.36	14.21	16.71	33.28	17.26	27.2	16.17	15.09	11.82	21.41	18.95	13.97	17.12	13.11	15.64	15.38	20.26	17.71	22	23.1	16.61	19.19	19.18	15.05	18.17	16.19	17.35	30.01	22.98	18.46	25.85	21.66	26.72	57.51	27.17	43.48	26.91	25.41	18.08	33.6	29.72	21.06	29.18	19.77
380916	380916	Lrch1	3.72	3.42	2.81	3.5	3.03	3.81	7.33	3.72	5.85	3.44	4.21	2.65	3.94	4.53	3.48	4.42	3.27	3.45	3.06	5.43	3.86	4.46	5.5	5.83	4.66	6.41	4.38	3.5	3.46	4.63	5.79	5.75	4.41	5.88	4.62	6.09	12.66	5.85	9.35	5.73	7.08	4.06	6.18	7.1	5.25	7.53	4.92
18483	18483	Palm	28.34	19.26	15.33	18.75	16.95	21.13	35.57	23.68	33.75	24.25	21.12	19.21	26.66	22.94	17.38	14.5	17.47	25.3	20.58	30.57	29.06	26.88	20.62	26.68	23.74	24.58	21.45	22.61	21.43	22.43	44.1	32.43	24.06	31.54	25.84	33.8	61.46	37.28	53.95	40.35	35.57	29.38	41.83	35.97	26.21	24.7	26.34
17535	17535	Mre11a	3.49	3.35	2.97	3.51	2.8	3.49	4.59	3.4	3.54	3.42	4.11	3.24	3.81	3.29	2.97	3.96	3.18	3.3	3.36	4.49	3.64	3.95	4.58	3.87	3.71	3.94	3.9	3.66	3.65	3.87	5.43	5.64	4.67	5.9	4.26	5.58	7.94	5.36	5.66	5.69	6.92	4.95	5.98	5.16	4.48	6.75	4.79
109900	109900	Asl	15.81	11.94	12.36	12.46	12.21	15.01	32.83	12.82	29.31	12.87	14.51	14.66	15.68	13.86	80.76	17.22	14.39	19.39	14.69	16.63	15.49	15.91	14.14	16.83	15.04	17.31	19.32	14.56	15.53	15.18	24.61	20.09	19.4	20.96	18.62	24.01	56.72	20.18	46.85	21.41	24.44	22.42	24.6	21.73	121.76	29.35	21.7
286940	286940	Flnb	15.09	27.81	15.73	23.38	10.85	14.49	24.14	19.75	12.68	23.43	22.55	7.32	14.81	18.93	13.45	11.5	7.66	12.62	10.04	35.38	21.9	16.6	25.96	27.47	17.01	47.79	17.4	16.61	24.25	21.43	23.49	46.82	24.68	39.34	16.53	23.17	41.71	31.09	20.27	38.99	37.97	11.2	23.23	29.68	20.28	19.6	11.55
56844	56844	Tssc4	34.54	27.93	24.74	25.29	31.16	29.28	36.16	29.77	37.63	29.23	26.61	23.06	31.73	28.27	22.11	26.03	27	27.3	32.41	44.61	33.3	41.97	34.22	27.92	23.29	30.77	25.35	29.5	26.87	27.49	53.76	47.02	38.84	42.55	47.48	46.83	62.48	46.88	60.15	48.64	44.81	35.27	49.79	44.32	33.34	44.36	40.7
225638	225638	Alpk2	4.87	3.82	5.03	5.19	4.85	4.99	0.83	4.28	2.39	4.96	2.27	7.2	3.15	3.11	2.24	9.05	4.88	4.13	3.72	0.09	2.41	3.82	4.73	3.13	4.77	0.48	5.89	5.28	3.92	2.97	7.58	6.42	7.89	8.73	7.38	7.97	1.44	6.75	3.83	8.26	3.83	11.01	4.95	4.88	3.38	15.42	7.36
171286	171286	Slc12a8	0.74	0.97	0.66	0.76	0.34	0.92	1.06	0.49	0.58	0.98	0.91	0.44	0.78	0.77	0.71	0.68	0.54	0.52	0.79	0.62	0.71	0.85	0.52	0.96	0.74	0.96	0.93	0.74	0.83	0.73	1.15	1.63	1.04	1.28	0.52	1.47	1.83	0.77	0.93	1.63	1.53	0.67	1.23	1.21	1.07	1.15	0.81
13522	13522	Adam28	1.89	0.01	0.02	0	1.88	0.97	0.15	0.84	0.36	0.02	0.02	0.04	0.34	0.9	0.5	0	0.34	0.27	0.46	4.41	0.55	0.5	3.59	0.34	0.53	5.88	0.36	0.04	0.09	0.67	2.94	0.02	0.02	0	2.86	1.55	0.26	1.33	0.57	0.03	0.03	0.06	0.54	1.41	0.75	0	0.51
230577	230577	Pars2	2.39	1.94	1.66	1.77	1.86	2.17	2.61	2.16	2.45	2.14	2	1.92	2.28	1.97	2.09	2.44	2.3	2.11	1.73	2.61	2.2	2.43	2.77	1.91	2.66	2.32	1.99	2.31	2	1.81	3.71	3.26	2.6	2.98	2.83	3.47	4.51	3.4	3.91	3.55	3.37	2.94	3.58	3.09	3.15	4.16	3.47
338363	338363	Tmem241	2.38	2.18	2.04	2.72	1.72	2.19	3.04	2.46	2.29	2.79	2.73	2.19	2.38	2.78	2.33	2.03	1.9	1.8	2.27	3.14	2.56	2.42	2.28	2.99	2.58	3.05	2.89	2.47	2.09	2.62	3.7	3.68	3.2	4.58	2.62	3.51	5.24	3.88	3.67	4.64	4.6	3.35	3.73	4.36	3.51	3.46	2.87
100041224	100041224	Gm3213	0	0	0	0	0	0	0	0	0	0	0	0	0	0	0	0	0	0	0.15	0	0	0	0	0	0	0	0	0	0	0	0	0	0	0	0	0	0	0	0	0	0	0	0	0	0	0	0
54131	54131	Irf3	28.5	27.52	23.26	25.88	27.54	24.85	31.83	26.39	28.97	26.91	28	21.54	29.25	28.22	30.77	31.1	21.25	21.32	21.8	35.79	26.94	32.64	27.78	27.59	24.3	31.12	24.32	30.28	25.83	27.82	44.35	46.32	36.52	43.53	41.97	39.74	54.99	41.56	46.3	44.78	47.16	32.94	45.91	44.25	46.39	52.99	32.04
245525	245525	Hsf3	0.02	0	0.02	0	0.02	0.02	0.06	0	0.02	0	0	0	0	0	0.02	0	0.04	0	0	0.06	0	0.03	0	0	0	0	0.05	0.01	0.02	0	0.02	0	0.02	0	0.02	0.02	0.1	0	0.03	0	0	0	0	0	0.02	0	0.06
18782	18782	Pla2g2d	0.9	0.25	0.12	0.11	0.49	0.6	0.28	0.51	0.23	0.38	0.15	0.59	0.49	0.45	0.23	0.1	0.46	0.69	0.38	1.38	0.61	0.25	0.36	0.53	0.58	1.29	0.86	0.43	0.62	0.64	1.4	0.41	0.19	0.19	0.74	0.95	0.48	0.8	0.37	0.63	0.26	0.91	0.76	0.7	0.35	0.17	0.69
69940	69940	Exoc1	12.94	13.84	10.38	11.88	11.15	11.19	14.69	13.19	11.56	9.24	11.86	11.25	13.42	12.75	9.83	9.67	9.94	9.8	12.06	20.68	15.24	13.92	13.26	12.58	11.46	15.16	11.67	12.86	10.63	12.58	20.15	23.3	16.3	19.98	16.99	17.9	25.38	20.77	18.47	15.37	19.98	17.2	21.07	19.99	14.81	16.48	14.99
22367	22367	Vrk1	4.74	3.7	3.76	4.07	3.42	4.18	4.52	4.15	4.66	4.46	5.7	3.14	5.18	4.6	3.3	3.38	3.55	4.28	4.06	6.52	4.66	5.33	5.96	4.62	4	4.22	4.07	4.36	3.7	4.71	7.37	6.23	5.9	6.85	5.22	6.69	7.81	6.54	7.45	7.42	9.61	4.81	8.14	7.22	4.97	5.75	5.35
76571	76571	Styxl1	0.2	0.15	0.1	0.04	0.19	0.05	0.24	0.02	0.14	0.21	0.21	0.11	0.21	0.13	0.18	0.15	0.11	0.07	0.1	0.08	0.33	0.15	0.06	0.15	0.08	0.11	0	0.02	0.18	0.05	0.31	0.26	0.15	0.07	0.28	0.09	0.42	0.04	0.22	0.36	0.35	0.18	0.33	0.21	0.27	0.25	0.17
66993	66993	Smarcd3	62.31	50.55	78.09	51.05	81.37	67.62	46.93	76.44	66.38	43.45	35.27	86.52	61.08	62.93	44.64	75.82	70.45	62	74.65	11.88	49.04	55.63	44.85	34.24	52.15	14.68	52.61	48.64	52.43	40	96.98	85.1	122.58	85.88	124.01	108.17	81.08	120.35	106.1	72.3	59.39	132.33	95.85	98.68	67.31	129.21	106.2
23825	23825	Banf1	104.52	83.54	90.41	78.39	101.03	90.14	85.08	99.33	95.86	82.36	95.22	101.91	93.05	97.62	74.86	90.23	96.59	91.34	104.56	99.94	108.14	107.01	99.72	65.93	78.54	67.08	76.11	90.02	81.85	76.38	162.66	140.63	141.92	131.87	153.98	144.18	146.99	156.4	153.22	137.04	160.35	155.87	146.02	153.08	112.86	153.77	145.62
72074	72074	Anks4b	0.02	0	0	0	0	0.02	0	0	0.05	0	0	0	0	0	12.54	0	0	0	0	0	0	0	0	0	0	0	0	0	0	0	0.03	0	0	0	0	0.03	0	0	0.08	0	0	0	0	0	18.91	0	0
109658	109658	Txlna	16.36	18.37	15.44	17.58	14.14	15.95	24.55	16.69	17.88	17.66	21.28	12.4	19.52	18.12	13.11	19.79	13.71	13.88	16.9	26.49	17.91	21.77	20.61	22.03	17.95	23.56	19.25	16.87	17.4	19.89	25.46	30.92	24.23	29.58	21.54	25.51	42.41	26.28	28.59	29.38	35.84	18.96	30.63	28.42	19.76	33.72	20.67
76479	76479	Smndc1	20	19.56	17.62	19.28	16.46	18.11	23.31	19.35	19.77	18.36	20.29	18.16	21.22	22.77	16	19.28	18.77	21.33	20.52	26.09	20.75	21.73	22.15	21.03	18.17	23.6	18.96	21.26	18.86	20.3	31.13	32.94	27.66	32.43	25.09	28.97	40.27	30.47	31.6	30.55	34.17	27.77	33.29	35.7	24.13	32.85	28.3
56351	56351	Ptges3	80.71	73.48	62.47	66.48	59.45	64.88	85.07	69.57	71.63	66.75	80.67	57.69	75.02	77.42	67.8	71.11	62.16	67.94	70.56	94.47	71.96	77.74	83.21	67.03	60.27	78.54	63.92	71.86	70.56	78.02	125.6	123.7	98.05	111.84	90.6	103.78	146.99	109.53	114.48	111.07	135.86	88.24	117.72	121.4	102.22	121.19	93.7
70024	70024	Mcm10	2.47	1.35	1.8	1.69	1.22	1.64	1.64	2.31	1.74	2.19	3.78	1.06	2.71	2.49	3.34	1.18	1.52	1.62	1.76	3.95	2.4	2.51	3.83	2.13	1.74	2.27	2.25	1.69	1.25	2.48	3.85	2.28	2.82	2.84	1.86	2.63	2.83	3.63	2.78	3.64	6.36	1.62	4.25	3.91	5.04	2.01	2.29
67863	67863	Slc25a11	87.1	68.04	96.92	74.72	105.61	93.61	53.83	83.94	79.56	79.16	68.05	111.64	86	82.72	77.41	90.08	105.23	87.39	92.61	43.99	80.77	72.91	76.27	57.1	91.95	47.2	76.79	93.18	75.37	67.14	135.55	114.55	152.14	125.69	160.97	149.73	93.01	132.17	127.17	131.71	114.6	170.76	134.95	129.7	116.69	153.51	158.64
432999	432999	A930007A09Rik	0.4	1.27	0.7	0.97	0.3	0.42	1.01	0.43	0.7	1.12	0.9	0.64	0.66	0.69	0.56	0.6	0.67	0.67	0.66	0.96	1.07	0.77	0.73	1.26	0.87	1.1	0.69	1.03	1.09	1.1	0.63	2.14	1.1	1.64	0.45	0.67	1.74	0.67	1.12	1.87	1.52	0.99	1.04	1.09	0.84	1.02	1
229363	229363	Gmps	9.29	8.74	7.03	7.64	7.47	8.25	9.17	8.99	8.66	8.54	9.22	7.06	9.24	9.44	7.34	9.96	8.24	8.37	8.64	12.62	9.39	10.81	10.88	8.89	8.21	9.61	9.38	9.22	7.55	9.42	14.46	14.71	11.04	12.85	11.39	13.2	15.84	14.15	13.84	14.21	15.53	10.79	14.5	14.8	11.07	16.98	12.43
103841	103841	Cuedc1	48.67	33.78	42.55	31.84	46.58	45.23	56.53	45.73	65.36	27.53	24.43	43.86	48.24	53.99	37.11	36.98	42.27	44.82	59.61	24.16	38.34	40.99	36.61	26.89	34.94	21.65	34.71	41.21	40.39	35.62	75.75	56.88	66.79	53.56	70.99	72.34	97.67	72.01	104.47	45.81	41.14	67.09	75.71	84.67	55.95	63.02	63.72
67936	67936	Wdr55	15.92	16.57	14.57	14.56	14.48	14.5	13.89	14.65	13.12	15	15.45	13.99	16.39	14.42	15.13	17.06	12.54	13.32	14.49	16.11	15.05	16.74	14.65	13.11	14.14	13.13	13.38	14.36	13.82	14.97	24.78	27.89	22.88	24.5	22.07	23.19	23.99	23.06	20.97	24.95	26.01	21.4	25.72	22.6	22.81	29.07	18.91
76041	76041	Ccdc125	2.46	1.69	1.06	1.52	1.65	1.65	2.71	2.34	2.04	1.41	1.23	1.99	2.64	2.42	2.55	1.14	1.02	1.86	2.47	3.89	2.51	2.69	2.16	2.81	2.42	3.15	2.77	2.02	1.48	2.16	3.82	2.84	1.66	2.57	2.51	2.64	4.69	3.68	3.25	2.34	2.06	3.05	4.14	3.79	3.85	1.95	1.54
110213	110213	Tmbim6	253.93	218.15	204.36	207.53	234.65	225.29	181.24	223.18	204.43	233.6	241.59	197.19	220.54	214.17	441.02	165.05	202.77	234.51	221.07	323	246.34	203.46	210.51	212.52	204.34	316.71	201.12	242.03	212.5	233.9	395.18	367.25	320.78	349.11	357.63	360.35	313.14	351.41	326.75	388.7	406.87	301.61	346.07	335.83	664.87	281.27	305.69
70152	70152	Mettl7a1	69.19	32.04	22.24	21.97	39.84	33.73	102.45	44.21	57.17	21.83	17.26	29.48	58.06	89.31	110.39	30.37	31.12	30.61	34.98	36.92	39.78	45.62	108.3	35.27	86.36	47.12	40.28	63.31	44.31	45.9	107.68	53.94	34.91	36.96	60.72	53.95	177.01	69.62	91.38	36.32	29.06	45.09	91.1	140.05	166.42	51.75	46.92
80749	80749	Lrfn1	2.09	0.8	0.35	0.66	1.12	1.86	2.46	1.74	1.88	1.08	1	0.72	1.63	1.65	0.96	0.8	0.89	1.27	1.18	2.64	0.74	1.2	1.53	1.5	1.62	1.9	1.23	1.08	1.11	1.63	3.25	1.35	0.55	1.11	1.71	2.98	4.25	2.75	3.01	1.8	1.68	1.11	2.56	2.58	1.44	1.36	1.34
381438	381438	Gm5148	10.45	9.03	6.98	3.99	6.66	1.71	3.89	6.21	1.32	7.52	9.39	7.85	11.01	13.28	7.65	8.64	7.89	10.49	10.27	15.86	11.53	15.61	7.98	8.62	5.51	6.39	4.63	8.55	9.14	0.67	16.26	15.2	10.95	6.71	10.15	2.74	6.72	9.78	2.11	12.52	15.81	12.01	17.28	20.82	11.53	14.73	11.9
19045	19045	Ppp1ca	183.37	186.25	178.36	188.97	182.88	167.9	154.91	176.03	141.18	201.61	206.39	158.46	172.4	170.83	150.21	217.27	161.3	172.13	151.28	196.7	166.99	201.72	190.2	184	176.08	181.38	182.74	209.05	169.71	185.94	285.37	313.55	279.96	317.89	278.73	268.55	267.66	277.17	225.65	335.47	347.57	242.37	270.54	267.87	226.46	370.26	243.17
277010	277010	Marveld1	22.66	31.05	24.75	33.02	17.17	35.89	96.14	23.68	86.02	35.77	33.14	16.05	27.5	23.92	26.3	24.6	18.41	34.65	18.07	33.03	26.9	26.29	27.99	44.04	27.76	41.95	30.54	30.6	47.61	30.34	35.26	52.27	38.85	55.55	26.17	57.41	166.11	37.29	137.49	59.53	55.81	24.55	43.15	37.51	39.65	41.93	27.75
234069	234069	Pcid2	9.96	8.14	7.32	8.85	7.22	8.94	11.81	10.07	10.48	8.12	9.19	7.19	9.34	9.86	7.99	8.73	6.79	8.17	8.8	13.02	8.69	9.66	10.4	10.1	9.04	11.27	9.47	8.67	8.76	10.57	15.5	13.71	11.49	14.89	11	14.29	20.4	15.85	16.75	13.51	15.47	11	14.65	15.47	12.04	14.87	10.24
22376	22376	Was	4.65	4.3	5.96	7.05	2.94	3.7	4.19	4.23	3.15	9.24	14	4.31	5.94	3.59	3.66	5.28	5.39	6.56	5.38	5.24	6.72	3.61	4.79	10.76	7.09	5.63	6.52	7.36	4.85	7.12	7.23	7.25	9.36	11.86	4.49	5.92	7.23	6.66	5.04	15.37	23.58	6.6	9.32	5.64	5.52	9	8.12
56727	56727	Miox	0	0	0	0	0	0	0	0	0	0	0.05	0	0.05	0	0.1	0	0	0	0	0	0	0	0	0	0	0	0	0	0	0	0	0	0	0	0	0	0	0	0	0	0.08	0	0.08	0	0.15	0	0
68737	68737	Angel1	3.05	2.94	3.33	3.22	3.61	2.85	1.92	2.27	2.05	2.79	2.46	3.16	2.71	2.42	1.83	5.51	2.79	2.39	2.48	2.61	2.55	4.14	2.51	2.44	2.89	2.83	3	2.56	2.34	2.87	4.75	4.94	5.22	5.41	5.51	4.56	3.32	3.58	3.28	4.64	4.14	4.83	4.25	3.8	2.76	9.38	4.2
277744	277744	Srarp	0.41	0.06	0.12	0.28	0.24	0.11	0.34	0.06	0.2	0.23	0.06	0	0.06	0.18	0.12	0	0	0	0	0	0	0	0.06	0.7	0.11	0.29	0.29	0.28	0.17	0.33	0.63	0.1	0.18	0.47	0.37	0.18	0.59	0.09	0.31	0.38	0.1	0	0.09	0.29	0.18	0	0
56190	56190	Rbm38	42.58	31.75	52.82	37.69	48.03	44.59	40.52	42.5	49.54	37.17	24.75	52.98	37.73	36.65	28.02	37.99	49.39	42.95	41.39	7.48	30.12	36.6	25.37	26.03	41.87	10.12	37.06	45.32	40.7	32.03	66.27	53.45	82.91	63.41	73.2	71.32	70.01	66.93	79.18	61.84	41.68	81.03	59.21	57.47	42.25	64.74	74.46
26432	26432	Plod2	20.02	79.76	45.98	62.78	22.5	31.63	46.5	25.58	32.78	56.26	64.06	20.14	38.6	29.92	26.41	33.96	27.79	40.4	27.32	34.43	48.76	34.55	53.3	54.46	33.71	42.81	46.71	82.55	61.5	62.58	31.16	134.27	72.17	105.61	34.29	50.59	80.34	40.28	52.39	93.62	107.88	30.81	60.57	46.92	39.81	57.87	41.9
673094	673094	Cd99	92.27	90.74	97.41	141.53	84.71	98.66	76.61	67.23	106.4	118.21	146.62	82.38	127.96	89.75	122.29	29.23	83.58	108.23	86.09	105.63	110.77	57.81	54.63	78.03	70.78	81.1	81.41	71	94.45	103.35	143.59	152.77	152.9	238.09	129.11	157.81	132.37	105.86	170.07	196.7	246.92	126.01	200.79	140.73	184.36	49.81	126
21771	21771	Utp4	13.82	13.01	10.53	12	11.98	10.97	12.17	11.79	12.61	11.51	12.89	9.89	12.22	12.65	9.38	15.28	11.37	9.74	11.59	15.9	9.98	14.22	14.7	11.81	13.23	12.27	13.74	14.23	10.84	14.13	21.5	21.9	16.54	20.19	18.26	17.55	21.02	18.56	20.16	19.15	21.71	15.12	19.18	19.83	14.14	26.05	17.14
74776	74776	Ppa2	28.75	26.74	32.17	24.39	34.94	33.42	34.04	29	37.55	26.2	22.81	37.45	30.89	29.55	34.78	31.17	39.86	32.49	35.66	25.64	30.77	29.4	31.74	21.29	25.12	25.69	21.84	28.29	22.74	21.88	44.74	45.02	50.49	41.04	53.25	53.46	58.81	45.67	60.02	43.6	38.41	57.28	48.47	46.33	52.43	53.12	60.09
71030	71030	4933403O08Rik	0	0.04	0.01	0.01	0.03	0.03	0.01	0.02	0.02	0.01	0.01	0.03	0.01	0	0.03	0.09	0.02	0.02	0	0.01	0.02	0.05	0	0.02	0.03	0	0.03	0.01	0	0.02	0.01	0.07	0.02	0.02	0.05	0.04	0.01	0.04	0.03	0.02	0.02	0.05	0.02	0	0.05	0.16	0.04
56516	56516	Rbms2	22.31	25.55	17.64	21.42	19.11	21.55	26.6	22.73	24.41	20.83	20.33	17.58	20.76	21.05	15.76	19.15	17.12	20	19.35	26.11	22.94	22.7	20.39	20.06	21.5	22.63	20.14	21.64	22.8	22.12	34.72	43.02	27.69	36.04	29.12	34.47	45.96	35.79	39.02	34.66	34.24	26.89	32.58	33.01	23.77	32.64	25.8
71481	71481	Alpk1	2.96	3.01	2.93	3.31	2.29	2.55	4.5	3.42	3.32	2.66	3.92	2.6	3.32	3.27	2.4	2.81	2.02	2.58	3.56	4.95	4.18	3.55	3.38	4.85	3.51	4.67	3.65	2.88	2.68	3.38	4.6	5.06	4.61	5.57	3.49	4.08	7.77	5.38	5.31	4.42	6.61	3.98	5.21	5.12	3.61	4.78	3.05
226251	226251	Ablim1	15.63	15.35	16.99	17.9	18.65	14.74	15.07	20.31	16.09	20.24	12.63	17.87	14.82	16.1	11.71	25.96	17.41	12.67	14.81	15.17	14.53	20.48	19.28	18.5	20.48	13.96	22.15	15.95	13.68	16.52	24.32	25.83	26.67	30.11	28.42	23.58	26.04	31.99	25.72	33.67	21.27	27.33	23.26	25.24	17.66	44.23	26.25
14613	14613	Gja5	19.05	13.43	10.23	9.29	12.62	16.16	17.77	47.62	34.32	9.81	19.3	18.78	27.82	40.38	15.66	18.21	14.58	15.38	17.24	33.31	30.7	38.1	24.9	20.47	15.06	18.05	14.47	13.76	18.95	16.15	29.65	22.61	16.06	15.62	19.23	25.85	30.71	74.98	54.85	16.32	32.51	28.73	43.66	63.32	23.61	31.03	21.98
77371	77371	Sec24a	3.23	4.9	4.02	4.1	3.37	3.21	4.14	4.16	3.19	3.6	4.53	3.73	4.03	4.39	5.93	3.96	3.79	2.92	3.4	3.85	3.91	3.91	3.83	4.63	4.21	3.47	4.62	3.42	3.96	4.39	5.02	8.25	6.31	6.89	5.13	5.14	7.15	6.55	5.09	5.99	7.63	5.71	6.32	6.88	8.93	6.75	5.71
59014	59014	Rrs1	23.88	18.19	17.18	16.27	18.44	19.41	23.26	18.69	19.18	18.28	23.58	19.19	24.03	25.45	16.73	16.59	19.34	21.99	24.16	27.46	21.39	23.09	28.44	20.7	18.89	21.52	23.54	21.51	21.19	25.96	37.17	30.62	26.96	27.37	28.1	31.05	40.19	29.42	30.65	30.41	39.72	29.35	37.71	39.91	25.22	28.27	29.15
50926	50926	Hnrnpdl	76.62	70.65	61.2	63.95	63.07	67	84.21	79.08	77.91	55.14	68.33	67.42	81.89	78.34	57.87	68.91	63.4	61.19	81.54	88.71	78.38	78.23	93.74	69.09	71.19	72.72	71.05	75.15	58.71	69.13	119.24	118.94	96.07	107.59	96.12	107.17	145.49	124.51	124.53	91.75	115.07	103.12	128.5	122.84	87.24	117.42	95.58
12371	12371	Casp9	6.02	6	5.34	5.87	5.41	5.27	5.94	5.34	5.57	7.14	7.7	5.84	6.52	5.9	6.67	5.18	5.42	6.62	5.95	9.23	7.21	6.94	6.9	8.24	7.24	7.65	6.64	6.58	5.89	7.05	9.37	10.11	8.38	9.87	8.25	8.44	10.26	8.41	8.91	11.88	12.97	8.93	10.23	9.25	10.06	8.82	8.17
666389	666389	Gm12447	0	0	0.07	0.1	0.07	0.03	0	0.03	0.04	0.03	0.03	0.18	0.07	0.15	0.04	0.07	0.04	0.03	0.22	0.04	0.04	0.07	0	0.07	0.03	0.03	0.14	0.03	0	0.07	0	0	0.12	0.17	0.11	0.05	0	0.05	0.06	0.06	0.06	0.28	0.11	0.23	0.05	0.12	0.06
66821	66821	Bcs1l	8.91	8.06	8.92	7.8	9.22	9	7.97	9.62	8.17	7.96	7.64	8.26	9.23	8.85	8.56	10.19	8.4	7.33	6.77	7.25	7.21	8.92	9.5	6.51	9.11	6.24	8.6	9.95	8.59	7.32	13.87	13.57	14.01	13.12	14.06	14.4	13.77	15.14	13.06	13.24	12.87	12.64	14.48	13.88	12.9	17.36	12.66
77505	77505	Dnhd1	0.54	0.55	0.5	0.53	0.49	0.45	0.69	0.46	0.55	0.45	0.48	0.41	0.64	0.58	0.43	0.55	0.32	0.29	0.56	0.78	0.77	0.66	0.6	0.69	0.74	0.83	0.73	0.39	0.43	0.54	0.85	0.92	0.78	0.89	0.74	0.71	1.19	0.73	0.88	0.75	0.81	0.62	1	0.91	0.64	0.93	0.49
668310	668310	Cc2d2b	0.01	0	0	0.01	0	0	0.01	0.01	0.01	0	0	0	0.01	0	0	0	0	0	0	0	0	0.01	0	0.01	0.02	0.01	0.02	0	0	0.03	0.02	0	0	0.02	0	0	0.01	0.01	0.02	0	0	0	0.01	0	0	0	0
68126	68126	Fahd2a	8.51	6.62	7.85	5.93	10.15	8.67	9.11	8.14	9.34	6.85	4.46	9.38	8.23	8.96	10.32	10.25	8.67	6.65	8.79	5.69	7.87	8.69	8.29	4.68	8.78	5.28	7.32	8.1	7.28	6.25	13.24	11.15	12.32	9.97	15.47	13.87	15.74	12.81	14.92	11.39	7.51	14.34	12.91	14.04	15.57	17.46	13.08
666528	666528	Zfp541	0.01	0.04	0.01	0.01	0.02	0.02	0.03	0.04	0.01	0.03	0.01	0	0.06	0.03	0.04	0.02	0.02	0.02	0.09	0.06	0.04	0.05	0.01	0.02	0.03	0.03	0	0.02	0.02	0.03	0.01	0.06	0.01	0.01	0.03	0.03	0.05	0.06	0.02	0.04	0.01	0	0.09	0.04	0.05	0.03	0.03
239743	239743	Klhl6	4.94	4.96	4.7	6.17	2.9	3.64	4.52	4.7	4.12	6.85	9.72	4.6	6.02	5.43	3.81	4.24	4.01	4.67	4.02	6.47	5.92	6.08	4.82	6.73	4.7	4.71	4.12	5.8	4.58	5.85	7.69	8.36	7.37	10.38	4.42	5.82	7.81	7.4	6.59	11.39	16.38	7.04	9.44	8.52	5.74	7.23	6.04
18008	18008	Nes	15.84	51.93	35.62	39.93	46.87	23.56	14.81	28.05	14.42	34.07	19.23	21.42	22.17	16.97	12.26	77.78	46.45	19.91	19.89	18.02	20.91	73.02	21.26	20.88	21.98	18.91	30.86	19.03	18.95	25.12	24.66	87.42	55.91	67.18	71.44	37.68	25.59	44.17	23.05	56.68	32.38	32.77	34.8	26.6	18.48	132.54	70.03
56464	56464	Ctsf	28.62	23.68	18.85	20.9	21.88	24.69	22.27	20.65	23.29	23.23	17.78	19.36	18.46	19.26	19.71	25.74	18.2	18.93	18.32	21.77	19.71	27.87	15.33	17.72	22.88	17.27	19.47	28.9	21.7	19.68	44.55	39.86	29.59	35.15	33.34	39.49	38.48	32.51	37.23	38.66	29.94	29.62	28.96	30.2	29.72	43.86	27.44
107895	107895	Mgat5	4.35	4.91	3.09	4.59	2.74	3.98	7.11	4.66	6.49	5.39	6.31	3.3	4.95	4.86	3.96	3.8	3.46	5.29	4.19	8.7	5.55	4.43	5.59	7.31	5.46	7.17	5.51	4.55	5.67	6.35	6.77	8.27	4.85	7.72	4.17	6.37	12.29	7.34	10.38	8.97	10.63	5.06	7.77	7.61	5.96	6.48	5.22
230234	230234	Abitram	3.94	4.81	3.16	3.72	3.02	3.34	5.29	3.87	3.3	4.31	4.55	2.59	4.18	4.42	2.48	3.53	2.91	2.94	3.39	6.28	4.17	3.86	5.61	5.42	4.47	6.17	4.36	3.47	3.67	4.88	6.13	8.1	4.96	6.27	4.6	5.34	9.14	6.09	5.27	7.16	7.66	3.96	6.56	6.93	3.73	6.02	4.39
13858	13858	Eps15	19.14	16.4	17.29	15.9	17.6	18.29	18.2	20.27	20.24	18.31	17.62	21.37	19.32	19.45	15.43	19.37	19.88	18.88	22.03	20.42	19.64	18.81	17.17	18.07	17.55	15.94	17.62	17.26	16.46	16.63	29.79	27.6	27.14	26.75	26.82	29.26	31.45	31.92	32.36	30.47	29.67	32.68	30.32	30.5	23.26	33	29.97
109359	109359	Abraxas2	13.32	12.66	13.28	13.43	14.26	13.47	13.23	13.4	12.35	14.56	13.73	16.09	14.05	12.3	11.25	16.97	14.49	13.05	15.42	14.16	13.73	16.89	13.77	12.86	14.76	12.93	13.52	12.69	13.1	12.68	20.73	21.32	20.85	22.58	21.73	21.54	22.87	21.09	19.74	24.24	23.11	24.6	22.05	19.28	16.97	28.92	21.85
76758	76758	Gsdma2	0.04	0	0	0	0	0	0	0	0	0	0	0	0	0	0	0	0	0	0	0	0	0.04	0	0	0	0	0	0	0	0	0.05	0	0	0	0	0	0	0	0	0	0	0	0	0	0	0	0
114141	114141	Cldn16	0	0	0	0	0	0	0	0	0	0	0	0	0	0	0	0	0	0	0.04	0	0	0	0	0	0	0	0	0	0	0	0	0	0	0	0	0	0	0	0	0	0	0	0	0	0	0	0
101533	101533	Klk9	0	0.37	0.09	1.25	0.06	0.12	0.07	0.15	0	0.21	0.15	0.25	0.35	0.26	0	0.16	0.09	0.32	0.23	0	0.52	0.2	0.04	0.09	0.12	0.04	0.09	0.51	0.61	0.85	0	0.62	0.15	2.11	0.1	0.19	0.13	0.24	0	0.35	0.25	0.39	0.55	0.4	0	0.27	0.14
235040	235040	Atg4d	19.11	14.49	18.25	14.14	18.9	17.24	13.6	17.71	17.67	13.64	13.1	20.65	16.2	15.96	16.13	14.77	16.62	16.56	18.15	13.01	12.83	12.78	15.06	12.53	14.53	11.98	13.94	17.52	15.73	14.93	29.74	24.39	28.64	23.79	28.8	27.58	23.49	27.88	28.24	22.7	22.06	31.59	25.42	25.03	24.32	25.17	25.06
319800	319800	Slc22a30	0.02	0	0	0	0	0	0	0	0	0	0	0	0	0.02	27.79	0	0	0	0	0	0	0	0	0	0	0	0	0	0	0	0.04	0	0	0	0	0	0	0	0	0	0	0	0	0.03	41.89	0	0
24102	24102	Trex2	0.05	0	0	0	0.21	0.05	0	0	0	0	0	0	0	0	0	0	0	0.05	0	0	0.05	0	0.3	0	0	0.05	0.05	0	0	0	0.08	0	0	0	0.31	0.08	0	0	0	0	0	0	0	0	0	0	0
16523	16523	Kcnj8	11.58	5.75	3.21	4.34	5.99	13.76	78.75	13.92	47.81	8.02	4.89	5.2	7.07	11.61	9.4	4.96	4.42	19.01	4.54	13.9	7.96	8.02	6.54	16.75	11.59	21	9.53	8.88	18.14	7.25	18.02	9.68	5.03	7.3	9.13	22	136.06	21.92	76.42	13.34	8.23	7.95	11.1	18.21	14.17	8.45	6.66
67763	67763	Prpsap1	36.11	21.47	19.16	20.29	24.38	26.92	45.36	32.4	43.5	21.19	24.77	20.56	35.54	36.26	31.23	22.3	20.55	23.68	27.59	43.45	29.59	33.72	32.77	28.91	26.7	36.84	24.64	24.66	24.22	27.51	56.2	36.15	30.07	34.13	37.15	43.07	78.38	51.02	69.53	35.25	41.71	31.44	55.77	56.86	47.09	38.01	30.98
12862	12862	Cox6a2	737.03	519.41	847.11	595.54	1097.41	916.59	249.15	872.63	693.45	540.81	350.19	1129.77	655.66	827.26	508.73	701.54	1053.02	797.78	910.87	0.85	610.05	442.27	490.42	299.11	710.43	71.03	565.85	611.73	614.21	482.47	1147.01	874.44	1329.68	1001.84	1672.57	1466.1	430.48	1374	1108.37	899.89	589.75	1728.02	1028.87	1297.19	766.95	1195.52	1587.48
66180	66180	P3h4	19.16	30.05	30.03	36.54	18.49	26.17	34.57	18.99	26.22	46.54	39.85	13.97	23.69	18.48	16.33	26.08	19.87	27.4	16.06	30.67	28.32	30.66	26.27	34.68	21.12	30.78	26.51	32.43	33.45	28.35	29.83	50.59	47.14	61.48	28.18	41.85	59.72	29.91	41.91	77.45	67.11	21.37	37.18	28.98	24.62	44.45	29.96
56790	56790	Supt20	12.91	13.8	11.9	15.42	11.07	11.41	19.21	12.3	12.63	13.53	14.68	9.75	13.38	14.38	10.42	14.95	8.72	8.95	11.75	19.71	14.24	14.55	18.66	17.34	15.56	21.24	15.82	12.1	13.29	15.81	20.09	23.23	18.68	25.94	16.87	18.25	33.18	19.36	20.18	22.52	24.73	14.91	21	22.55	15.7	25.48	13.15
12387	12387	Ctnnb1	210.22	203.92	131.08	153.05	155.47	167.38	217.67	189.18	186.5	165.83	180	136.9	179.66	204.1	143.83	150.28	135.41	165.99	164.73	297.84	199.75	197.28	197.33	206.81	187.1	288.35	165.31	189.65	174.07	201.95	327.17	343.3	205.75	257.48	236.95	267.73	376.09	297.88	298.08	275.94	303.13	209.39	281.92	320.03	216.83	256.1	204.13
69579	69579	2310034P14Rik	1.01	1.1	0.8	0.48	0.8	0.81	0.72	0.83	0.76	0.77	1.08	0.98	1.38	1.31	0.82	0.93	0.67	0.81	1.08	1.36	1.12	1.1	1.45	1.36	1.02	0.88	1.14	1.16	0.98	1.27	1.57	1.85	1.25	0.81	1.22	1.3	1.24	1.31	1.22	1.27	1.81	1.5	2.17	2.05	1.23	1.58	1.01
68475	68475	Ssna1	46.82	44.19	43	46.48	40.17	41.9	43.45	42.21	42.82	49.94	48.72	35.47	44.1	41.27	34.7	39.64	36.55	36.21	36.72	44.73	43.04	46.77	47.99	39.83	32.92	43.2	39.66	51.46	42.57	43.47	72.86	74.4	67.5	78.2	61.22	67.02	75.08	66.47	68.44	83.1	82.05	54.26	69.21	64.72	52.32	67.54	55.1
110794	110794	Cebpe	0.27	0.27	0.35	0.04	0.04	0.04	0.18	0.04	0.22	0.11	0.63	0.48	0.56	0.24	1.25	0.12	0.15	0.57	0.33	0.24	0.41	0.16	0.19	0.31	0.53	0.19	0.23	0.52	0.34	0.58	0.42	0.46	0.55	0.06	0.06	0.06	0.31	0.06	0.35	0.19	1.07	0.73	0.87	0.38	1.88	0.2	0.23
60599	60599	Trp53inp1	14.26	13.76	7.01	8.14	14.22	11.14	11.46	12.78	10.43	7.22	8.65	10.8	10.13	13.74	10.99	7.41	11.08	9.26	11.45	20.68	16.55	11.1	11.14	10.94	16.28	21.78	9.38	8.26	10.43	10.16	22.2	23.17	11.01	13.7	21.68	17.81	19.8	20.12	16.67	12.02	14.57	16.52	15.9	21.54	16.57	12.63	16.71
268515	268515	Bahcc1	1.42	1.54	1.8	1.79	1.26	1.58	2.55	1.28	2.5	2.48	2.78	1.24	1.54	1.45	1.38	2.16	1.24	1.44	0.98	1.23	1.51	1.54	2	2.64	2.28	1.95	1.87	1.46	1.49	1.88	2.21	2.58	2.82	3.01	1.91	2.52	4.41	2.02	4	4.13	4.69	1.9	2.42	2.27	2.08	3.68	1.87
12799	12799	Cnp	19.8	9.99	11.66	12.97	21.25	15.98	15.33	15.13	15.85	14.48	15.28	9.24	12.48	14.33	13.82	11.74	11.92	14.43	11.64	26.75	14.34	15.32	15.73	14.71	13.93	30.13	13.38	13.62	11.91	15	30.81	16.82	18.3	21.82	32.38	25.57	26.48	23.82	25.34	24.1	25.73	14.14	19.59	22.48	20.83	20.01	17.97
18193	18193	Nsd1	9.95	11.04	9.14	10.37	9.05	9.95	11.37	10.8	10.34	10.32	11.04	8.95	10.94	10.81	8.37	13.67	9.5	8.89	10.85	14.29	11.29	12.98	12.92	13.4	12.21	13.3	13.11	8.4	10.07	12.35	15.48	18.59	14.35	17.44	13.8	15.91	19.65	17	16.53	17.18	18.58	13.69	17.17	16.94	12.63	23.3	14.32
100125586	100125586	Vmn2r2	0	0	0	0	0	0	0	0	0	0	0.01	0	0	0	0	0	0	0	0	0	0	0	0	0	0	0	0	0	0	0	0	0	0	0	0	0	0	0	0	0	0.02	0	0	0	0	0	0
14583	14583	Gfpt1	12.94	13.37	12.74	14.73	13.63	12.34	10.99	12.75	9.52	13.58	16.53	10.7	12.5	12.77	9.52	13.65	11.41	10.93	12.16	19.11	13.14	13.47	16.43	14.51	12.82	22.56	15.27	12	14.06	16.96	20.14	22.5	19.99	24.77	20.78	19.75	18.99	20.07	15.22	22.59	27.83	16.37	19.62	20.02	14.34	23.27	17.2
20317	20317	Serpinf1	227.96	261.97	311.79	352.04	207.15	256.75	201.26	213.2	169.13	449.53	483.77	165.46	231.12	164.83	331.81	314.42	219.3	194.04	177.14	334.03	276.11	361.21	222.42	256.7	194.06	251.99	253.93	324.25	246.02	266.67	354.77	441.04	489.4	592.23	315.72	410.67	347.74	335.7	270.33	748	814.72	253.08	362.68	258.46	500.23	535.82	330.61
15505	15505	Hsph1	33.02	42.23	32.45	34.4	30.61	27.22	41.5	36.4	46.05	29.62	27.57	35.81	32.39	33.92	25.27	44.84	30.63	32.65	33.32	27.77	27.31	34.04	34.64	27.21	29.8	25.77	32.23	42.13	46.08	39.22	51.38	71.1	50.93	57.86	46.66	43.53	71.7	57.31	73.6	49.28	46.43	54.78	50.83	53.18	38.1	76.42	46.17
67978	67978	Tctn2	4.58	3.8	2.28	3.66	2.66	4.22	5.32	3.75	4.97	3.83	3.27	1.74	3.56	2.88	2.19	2.66	2.18	3.78	2.26	5.97	4.07	3.9	3.95	4.03	3.83	6.97	3.74	3.79	4.6	3.86	7.13	6.4	3.58	6.16	4.05	6.76	9.19	5.9	7.95	6.38	5.51	2.67	5.58	4.51	3.31	4.53	3.29
20856	20856	Stc2	11.66	3.45	1.11	3.17	10.46	9.56	2.6	6.67	3.41	2.42	1.24	2.4	3.86	7.23	2.29	3.63	3.1	2.96	3.93	20.61	3.16	4.71	9.23	5.62	5.46	31.13	4.47	4.13	2.91	6.22	18.15	5.81	1.74	5.33	15.94	15.3	4.5	10.5	5.45	4.03	2.08	3.67	6.05	11.34	3.45	6.18	4.67
234673	234673	Ces2e	0.19	0.17	0.06	0.1	0.25	0.12	0.15	0.22	0.05	0.17	0.16	0.2	0.45	0.21	19.99	0.02	0.11	0.52	0.26	0.45	0.23	0.36	0.69	0.38	0.26	0.31	0.38	0.19	0.27	0.44	0.29	0.29	0.1	0.17	0.38	0.2	0.26	0.34	0.08	0.28	0.27	0.31	0.7	0.33	30.14	0.04	0.16
282619	282619	Sbsn	7.55	175.58	35.38	58.24	8.24	9.79	19.63	8.11	18.17	40.72	37.99	9.85	12.12	11.77	9.41	6.69	12.79	14.6	8.91	13.32	23.89	15.14	11.71	19.41	12.64	12.97	14.07	71.54	59.74	71.96	11.75	295.6	55.53	97.98	12.56	15.67	33.92	12.77	29.04	67.76	63.98	15.07	19.02	18.45	14.19	11.39	19.28
15407	15407	Hoxb1	0	0	0.02	0.02	0	0	0	0.02	0	0	0	0.02	0.02	0.02	0	0	0	0	0	0	0	0	0	0.02	0.02	0.04	0.02	0.04	0	0.02	0	0	0.03	0.03	0	0	0	0.03	0	0	0	0.03	0.03	0.03	0	0	0
23948	23948	Mmp17	7.78	4.14	0.9	1.74	2.84	6.12	26.6	8.05	15.41	2.25	2.15	2.01	12.78	12.58	8.36	1.26	2.54	5.99	3.23	7.84	5.97	4.93	18.17	8.49	8.1	11.11	5.4	5.34	16.64	5.09	12.11	6.97	1.41	2.93	4.33	9.79	45.97	12.67	24.63	3.75	3.62	3.07	20.06	19.72	12.6	2.15	3.82
66627	66627	Ogfod2	16.99	15.51	14.97	11.92	16.89	14.88	16.17	14.89	20.01	12.42	13.53	15.45	15.44	16.13	16.39	12.91	15.17	14.61	17.67	17.79	17.2	18.38	12.96	12.18	12.54	16.32	11.49	14.25	14.86	13.09	26.45	26.1	23.49	20.05	25.75	23.81	27.93	23.44	31.98	20.67	22.78	23.63	24.23	25.29	24.71	22	22.87
12380	12380	Cast	24.6	39.58	35.81	37.29	28.39	27.5	30.43	27.52	27.02	36.02	32.87	32.3	28.29	28.91	23.02	31.28	32.68	27.97	30.12	27.26	30.03	27.74	38.89	34.38	30.15	30.47	31.87	33.65	33.3	36.89	38.29	66.64	56.21	62.73	43.27	43.98	52.58	43.33	43.18	59.94	55.36	49.41	44.4	45.33	34.71	53.31	49.26
15161	15161	Hcfc1	13.29	13.61	11.06	12.83	11.02	13.08	16.78	13.12	14.48	13.19	15.79	9.55	13.4	13.61	10.49	16.17	10.71	11.34	11.34	16.79	12.14	14.95	18.21	17.46	16.34	17.15	17.22	10.62	13.34	16.6	20.68	22.92	17.35	21.58	16.8	20.93	29	20.66	23.14	21.95	26.58	14.61	21.03	21.34	15.81	27.55	16.15
16796	16796	Lasp1	67.11	76.34	61.43	70.83	58.26	64.63	70.68	72.81	59.67	85.97	118.92	56.86	81.44	69.4	67.38	52.43	58.51	76.05	73.76	136.57	92.96	75.81	79.1	101.74	69.33	107.41	76.35	70.49	74.06	93.23	104.44	128.52	96.42	119.16	88.79	103.38	122.12	114.65	95.37	143.05	200.27	86.96	127.8	108.83	101.57	89.35	88.2
268807	268807	Klhl38	8.87	8.88	7.79	4.75	8.84	8.05	3.09	5.56	7.25	3.11	3.59	6.58	4.4	5.74	5.43	3.54	6.97	8.05	6.59	0.67	3.56	3.47	5.57	4.96	8.94	1.68	5.35	5.08	3.64	4.51	13.8	14.95	12.23	7.99	13.47	12.88	5.34	8.76	11.59	5.17	6.04	10.07	6.91	9.01	8.19	6.04	10.51
232164	232164	Paip2b	21.98	14.99	17.23	14.82	17.93	19.48	13.44	18.3	18.03	12.46	11.85	18.84	15.94	17.03	14.12	16.74	18.63	17.06	18.07	8.89	12.82	12.82	18.26	12.27	19.38	9.77	16.19	15.39	16.95	14.31	34.21	25.23	27.05	24.94	27.32	31.15	23.22	28.81	28.82	20.73	19.95	28.81	25.01	26.7	21.29	28.53	28.09
382231	382231	8030474K03Rik	0	0	0	0	0.08	0.08	0	0	0	0.02	0	0.08	0.07	0.07	0	0.02	0	0.04	0	0	0.23	0.2	0	0	0	0	0	0	0	0	0	0	0	0	0.12	0.12	0	0	0	0.03	0	0.13	0.11	0.11	0	0.04	0
574418	574418	Serinc4	0.35	0.48	0.44	0.23	0.46	0.11	0.24	0.27	0.1	0.25	0.5	0.66	0.21	0.35	0.41	0.19	0.28	0.43	0.37	0.47	0.58	0.63	0.5	0.18	0.4	0.36	0.16	0.29	0.34	0.03	0.54	0.81	0.69	0.39	0.7	0.18	0.41	0.43	0.17	0.41	0.84	1	0.33	0.54	0.61	0.32	0.43
75811	75811	Saxo1	0.05	0	0	0.02	0	0	0.06	0.02	0	0.02	0	0.03	0.03	0.05	0.02	0	0.07	0.07	0	0.03	0	0	0.05	0.02	0.05	0.02	0.02	0	0	0.02	0.08	0	0	0.04	0	0	0.1	0.04	0	0.04	0	0.04	0.04	0.08	0.04	0	0.11
215900	215900	Calhm6	2.73	0.41	2.63	2.69	1.43	1.27	0.81	1.48	0.77	2.53	2.22	1.95	1.42	1.29	1.99	2.85	2.3	2.33	1.94	1.96	1.74	3.51	1.07	2.11	1.52	1.05	1.75	2.35	1.04	1.08	4.26	0.7	4.13	4.53	2.17	2.04	1.4	2.33	1.24	4.21	3.74	2.98	2.23	2.02	3	4.85	3.47
81845	81845	Gpank1	14.86	11.72	11.33	10.74	12.05	10.97	13.94	13.67	14.34	11.45	11.96	12.64	13.44	12.68	10.9	11.97	13.19	12.76	13.94	15.05	13.79	12.64	9.78	9.92	11.33	12.66	9.54	12.44	12.2	10.68	23.12	19.74	17.78	18.08	18.36	17.55	24.09	21.52	22.93	19.05	20.14	19.33	21.09	19.89	16.43	20.41	19.88
75619	75619	Fastkd2	6.29	5.64	5.23	4.64	5.96	5.85	6.42	6.14	6.76	4.56	5.81	5.28	6.19	6.43	6.1	5.79	5.68	4.67	6.28	6.38	5.28	5.89	6.48	5.41	6.02	5.9	5.96	6.63	5.06	6.26	9.79	9.49	8.21	7.8	9.08	9.35	11.09	9.67	10.81	7.59	9.79	8.08	9.71	10.09	9.2	9.87	8.57
20766	20766	Sprr3	0	0	0	0	0	0	0.11	0.04	0	0	0	0	0	0.05	0	0	0	0	0.05	0	0	0	0.05	0	0	0.05	0.04	0	0	0	0	0	0	0	0	0	0.19	0.07	0	0	0	0	0	0.07	0	0	0
64424	64424	Polr1e	2.76	2.49	2.25	2.2	2.21	2.57	2.76	2.42	2.6	2.22	2.95	1.75	3.1	3.12	2.02	2.53	2.06	2.09	2.65	3.56	2.64	3.42	4.14	2.51	2.42	2.96	2.49	2.81	2.34	2.71	4.3	4.19	3.53	3.7	3.38	4.11	4.76	3.8	4.16	3.69	4.96	2.68	4.86	4.89	3.05	4.3	3.11
50887	50887	Hmgn5	20.5	20.12	21.36	20.51	15.58	18.44	20.07	18.45	17.54	25.19	21.71	13.72	19.95	18.23	25.22	14.73	16.65	21.21	16.48	23.63	23.59	19.9	22.49	22.72	18.28	34.31	21.77	17.35	22.92	20.68	31.91	33.87	33.53	34.5	23.74	29.5	34.68	29.05	28.03	41.92	36.56	20.98	31.31	28.59	38.02	25.11	25.1
213439	213439	Gpr174	0.18	0.04	0.07	0.03	0.04	0.1	0.06	0.01	0.05	0.05	0.07	0.03	0.02	0.03	0.05	0.03	0.11	0.03	0.01	0.03	0.04	0.04	0.05	0.09	0.09	0.06	0.07	0.12	0.05	0.17	0.27	0.07	0.11	0.05	0.06	0.16	0.1	0.01	0.09	0.08	0.12	0.04	0.04	0.04	0.07	0.06	0.16
17920	17920	Myo6	6.3	5.58	3.38	4.34	5.8	5.56	6.29	6.33	6.62	4.32	4.25	3.45	5.5	7.39	6.61	4.78	3.98	3.61	5.4	9.63	5.26	6.15	7.58	5.25	5.43	12.15	5.33	4.45	5.16	6.25	9.81	9.4	5.3	7.29	8.84	8.9	10.86	9.96	10.57	7.18	7.16	5.28	8.63	11.58	9.96	8.14	6
105244831	105244831	Gm40367	4.56	3.12	2.8	3.63	3.47	3.01	4.68	2.8	3.05	3.75	3.67	3.04	3.41	3.33	2.28	4.04	2.8	2.95	2.63	5.78	5.13	4.78	3.06	4.4	4.17	3.23	3.74	4.36	2.95	3.2	7.09	5.25	4.39	6.1	5.29	4.82	8.09	4.41	4.88	6.23	6.18	4.65	5.35	5.23	3.43	6.89	4.22
100039446	100039446	Gm2240	0.03	0	0.03	0.05	0.03	0.03	0.1	0	0.06	0.03	0	0.03	0	0.09	0	0.03	0	0.03	0.06	0.34	0.03	0.03	0.14	0	0.05	0.08	0	0	0	0.08	0.04	0	0.04	0.09	0.04	0.04	0.17	0	0.1	0.04	0	0.04	0	0.14	0	0.05	0
381668	381668	Fbrsl1	15.69	11.5	10.9	12.05	14.23	14.9	17.08	13.91	16.12	10.92	13.09	11.74	13.6	14.71	10.49	12.83	11.49	11.39	13.58	22.07	12.36	14.84	11.21	13.11	14.46	19.25	12.77	10.63	10.9	12.31	24.41	19.35	17.1	20.27	21.69	23.83	29.51	21.9	25.77	18.18	22.04	17.96	21.34	23.07	15.82	21.86	17.32
17069	17069	Ly6e	420.55	193.39	353.02	359.47	294.94	336.05	302.98	322.54	297.39	412.34	451.67	210.05	279.3	300.25	342.39	172.03	220.85	308.53	231.39	647.72	325.21	325.58	253.59	298.23	251.7	548.46	280.11	339.21	295.72	283.58	654.48	325.57	554.12	604.72	449.52	537.52	523.48	507.86	475.32	686.12	760.66	321.28	438.29	470.8	516.18	293.16	332.95
108167391	108167391	LOC108167391	0	0	0	0.02	0	0.02	0.03	0	0	0	0	0	0.65	0.52	0.62	0.02	0.43	0.6	0.82	0.64	0.21	0.55	0	0	0	0.07	0	0	0.03	0.03	0	0	0	0.04	0	0.03	0.05	0	0	0	0	0	1.03	0.81	0.93	0.04	0.65
231532	231532	Arhgap24	8.34	11.6	12.5	14.82	12.51	10.19	16.35	10.01	10.98	13.7	9.23	11.91	7.59	6.75	7.72	18.47	12.32	11.46	8.68	9.24	10.04	13.65	10.04	11.08	11.06	9.72	12.08	9.7	10.74	10.49	12.98	19.52	19.62	24.93	19.06	16.3	28.26	15.76	17.56	22.8	15.55	18.22	11.91	10.58	11.64	31.48	18.58
104418	104418	Dgkz	37.89	33.15	39.94	35.23	41.77	32.62	51.01	33.86	46.1	33.84	39.3	34.62	38.11	38.57	28.1	55.49	32.23	28.63	33.59	38.92	34.94	45.71	37.31	40.96	39.47	46.76	37.14	30.68	29.23	36.43	58.96	55.82	62.69	59.27	63.66	52.18	88.14	53.31	73.69	56.32	66.19	52.95	59.8	60.48	42.37	94.56	48.59
11848	11848	Rhoa	158.89	211.81	164.56	187.49	146.12	157.27	183.4	163.62	166.97	216.49	229.11	148.9	188.27	161.25	142.76	167.56	154.28	198.46	164.27	229.96	198.2	186.32	205.59	219.11	173.86	212.71	185.32	225.91	189.29	207.49	247.28	356.59	258.3	315.4	222.71	251.56	316.88	257.63	266.88	360.23	385.84	227.75	295.43	252.85	215.22	285.54	232.59
59092	59092	Pcbp4	32.64	37.71	39.44	37.86	43.96	34.79	36.75	37.44	36.54	35.11	30.4	38.7	35.57	33.08	27.85	61.37	37.87	32.42	37.41	33.53	32.47	55.02	27.42	28.67	33.38	23.15	30.7	36.55	32.93	29.65	50.79	63.49	61.9	63.69	66.99	55.64	63.49	58.95	58.4	58.42	51.2	59.19	55.82	51.86	41.99	104.59	57.09
76872	76872	Ccdc116	0.39	0.68	0.38	0.68	0.28	0.39	0.46	0.41	0.4	0.66	0.65	0.24	0.31	0.42	0.26	0.32	0.24	0.3	0.42	0.82	1.19	0.84	0.54	0.45	0.42	0.65	0.62	0.56	0.45	0.6	0.61	1.14	0.59	1.15	0.42	0.63	0.8	0.65	0.64	1.1	1.09	0.37	0.49	0.66	0.4	0.55	0.37
15199	15199	Hebp1	18.11	18.3	18.86	17.3	16.56	14.37	15.87	15.86	15.55	22.82	30.64	19.87	20.1	21.44	131.58	21.99	20.39	22.96	22.42	23.55	23.86	26.63	20.21	20.11	18.65	16	17.49	23.24	18.49	21.43	28.18	30.81	29.6	29.1	25.23	22.98	27.42	24.97	24.86	37.97	51.61	30.39	31.54	33.62	198.36	37.47	30.74
654470	654470	Tctn1	5.58	5.42	3.93	4.34	4.74	4.74	7.5	5.26	7.11	4.23	4.96	3.51	5.26	5.33	3.8	5.14	3.55	3.46	4.37	8.9	6.27	6.22	5.25	5.19	5.81	8.03	4.7	4.45	4.53	4.56	8.68	9.12	6.16	7.3	7.22	7.59	12.96	8.29	11.37	7.04	8.36	5.37	8.25	8.35	5.73	8.75	5.35
78560	78560	Adgra2	31.21	35.36	22.42	31.86	17.83	35.86	43.19	34.7	34.32	36.29	38.68	15.96	33.46	30.89	21.51	20.26	18.28	27.74	23.34	45.33	34.6	27.63	33.53	49.3	41.93	44.53	44.02	33.81	36.17	41.99	48.57	59.54	35.19	53.6	27.17	57.35	74.63	54.64	54.86	60.38	65.14	24.41	52.5	48.44	32.42	34.53	27.56
67383	67383	Carnmt1	45.98	32.95	42.99	31.02	47.68	40.8	18.38	44.11	29.77	27.68	27.14	54.04	38.31	44.34	28.52	28.25	52.83	42.04	51.5	12.1	32.18	21.35	31.06	25.41	42.03	12.46	37.98	29.78	37.89	26.22	71.55	55.47	67.48	52.18	72.67	65.25	31.75	69.46	47.59	46.06	45.7	82.66	60.12	69.52	42.99	48.14	79.64
19663	19663	Rbpms	57.93	49.26	17.46	26.04	31.51	46.56	187.15	57.08	148.88	28.31	25.12	29.01	56.14	70.14	58.82	15.59	22.26	52.59	35.39	71.69	52.43	48.11	70.54	57.57	50.17	79.33	32.22	45.7	64.14	46.44	90.15	82.94	27.41	43.81	48.03	74.47	323.35	89.87	237.96	47.1	42.3	44.38	88.09	109.98	88.68	26.57	33.55
100043125	100043125	Cd300ld5	1.47	5.33	5.44	11.56	1.72	5.36	3.17	0.62	2.35	12.46	6.99	1.89	3.51	2.86	2.36	8.76	1.92	6.78	5.75	2.2	1.37	6.44	4.03	9.53	6.63	4.26	6.62	9.34	2.77	4.88	2.29	8.97	8.54	19.45	2.63	8.57	5.48	0.98	3.76	20.74	11.77	2.89	5.51	4.49	3.56	14.93	2.89
74470	74470	Cep72	0.85	0.55	0.46	0.64	0.55	0.48	1.09	0.57	1.1	0.67	0.88	0.37	0.65	0.93	0.56	0.51	0.54	0.45	0.69	1.2	0.75	0.79	1.11	0.77	0.99	0.71	0.81	0.51	0.69	0.59	1.32	0.93	0.73	1.07	0.84	0.77	1.89	0.9	1.76	1.12	1.49	0.56	1.03	1.46	0.85	0.87	0.82
114873	114873	Dscaml1	0.03	0	0.01	0.02	0.03	0.05	0.2	0	0.22	0.01	0.02	0.04	0.01	0.01	0.01	0.02	0.01	0.08	0.01	0.01	0.01	0.02	0.1	0.08	0.02	0.02	0.02	0.02	0.04	0.04	0.05	0	0.02	0.03	0.05	0.08	0.35	0	0.34	0.02	0.03	0.06	0.01	0.02	0.01	0.04	0.02
22390	22390	Wee1	3.03	11.53	3.89	8.8	1.98	3.11	3.8	3.4	2.93	4.77	6	1.49	4.52	4.18	2.42	3.4	2.46	2.65	3.33	4.99	3.68	3.56	5.34	4.61	4.07	3.85	5.07	8.93	8.59	8.18	4.71	19.41	6.1	14.8	3.02	4.98	6.57	5.35	4.69	7.93	10.1	2.28	7.09	6.55	3.65	5.79	3.7
20290	20290	Ccl1	0.15	0	0	0	0	0	0	0	0	0.15	0	0	0	0.16	0	0	0	0	0	0	0	0.32	0	0.15	0	0.16	0.15	0	0	0	0.24	0	0	0	0	0	0	0	0	0.25	0	0	0	0.25	0	0	0
22759	22759	Zfp97	2.36	1.52	1.9	2.07	1.93	1.88	2.59	1.79	2.31	2.5	2.43	2.5	2.16	2.89	3.22	2.88	2.75	2.71	2.3	3	2.83	2.78	2.8	2.7	2.47	2.31	2.35	2.29	2.06	2.18	3.68	2.56	2.98	3.48	2.94	3.01	4.47	2.82	3.69	4.15	4.09	3.83	3.39	4.54	4.86	4.9	4.14
30937	30937	Lmcd1	49.69	147.86	104.45	125.06	100.94	69.28	38.2	97.37	49.06	105	68.93	158.72	60.21	64.65	41.85	93.83	104.89	67.57	77.54	8.85	52.76	60.16	102.57	48.76	74.28	22.38	101.09	230.81	97.37	113.58	77.33	248.92	163.94	210.38	153.85	110.81	66	153.32	78.42	174.71	116.09	242.76	94.49	101.37	63.1	159.9	158.13
104318	104318	Csnk1d	60.75	54.27	43.87	48.98	49.99	52.47	66.27	58.65	59.39	53.17	57.06	44.35	57.43	54.35	44.47	50.88	44.05	53.75	54.92	85.61	57.64	61.92	59.68	57.85	53.26	73.51	53.4	51.43	52.6	57.87	94.55	91.36	68.87	82.4	76.2	83.93	114.5	92.35	94.92	88.48	96.09	67.83	90.11	85.23	67.04	86.71	66.41
22003	22003	Tpm1	6921.03	4744.82	8070.13	6247.7	7863.05	7656.56	4952.24	8339.2	7275.97	4430.12	3464.86	8905.97	6168.21	7545.46	4764.84	5001.3	10285.7	7636.89	9854.09	837.3	5462.73	3798.25	4470.57	3273.96	4464.92	1404.03	4720.26	4326.41	5908.37	3604.19	10771	7987.96	12667.4	10510.2	11984.1	12246.7	8556.38	13130.5	11629.5	7371.55	5835.12	13621.9	9679.28	11831.7	7183.34	8522.93	15506.2
17868	17868	Mybpc3	0.05	0.11	0.11	0.11	0.09	0.06	0.15	0.03	0.05	0.07	0.16	0.13	0.13	0.11	0.09	0.09	0.11	0.11	0.09	0.19	0.13	0.1	0.08	0.21	0.08	0.14	0.09	0.07	0.03	0.13	0.07	0.18	0.17	0.19	0.14	0.09	0.26	0.04	0.09	0.12	0.27	0.2	0.2	0.17	0.13	0.15	0.16
100502698	100502698	Rubcn	7.86	10.99	11.16	11.07	9.78	8.72	10.08	9.18	8.44	9.91	9.11	9.56	8.22	8.41	7.29	17.2	8.97	7.63	8.12	7.14	8.45	15.07	9.16	9.57	10.02	8.31	10.02	8.7	9.04	11.03	12.23	18.51	17.52	18.63	14.91	13.94	17.42	14.46	13.5	16.49	15.33	14.63	12.89	13.18	10.98	29.31	13.53
58172	58172	Sertad2	4.76	5.83	4.38	5.17	4.64	4.4	6.13	5.03	4.47	4.91	5.33	4.53	5.29	5.07	4.2	6.92	4.52	4.93	4.85	6.37	5.29	5.84	5.91	5.81	5.69	5.88	5.63	4.98	5.19	5.76	7.41	9.82	6.88	8.69	7.07	7.03	10.58	7.91	7.15	8.16	8.98	6.92	8.31	7.95	6.33	11.8	6.81
94217	94217	Lrp1b	0	0	0	0	0	0.02	0.04	0	0.02	0	0	0	0	0.01	0	0	0	0	0	0.01	0	0	0	0	0.01	0	0	0	0	0	0.01	0	0	0	0	0.03	0.07	0	0.03	0	0.01	0	0	0.02	0	0	0.01
18038	18038	Nfkbil1	18.2	13.18	11.74	11.99	15.65	13.04	12.74	14	14.38	12.78	13.18	12.58	15.66	15.37	13.06	12.7	13.56	13.11	14.43	19.29	16.36	18.85	11.86	12.01	11.49	16.19	11.05	13.13	11.95	11.19	28.32	22.19	18.43	20.17	23.86	20.85	22.01	22.05	22.98	21.27	22.2	19.25	24.58	24.1	19.7	21.64	20.44
66308	66308	Mplkip	4.83	4.38	3.92	4.16	4.41	4.17	5.26	4.73	4.87	4.31	4.85	3.66	4.52	4.61	4.2	4.43	4.18	4.3	3.72	6.99	5.29	5.54	4.37	4.68	4.14	5.46	3.94	4.57	4.21	4.67	7.52	7.38	6.16	7	6.73	6.67	9.08	7.45	7.78	7.17	8.17	5.6	7.09	7.24	6.33	7.55	6.3
66912	66912	Bzw2	83.8	54.34	60.43	52.36	80.6	74.69	70.61	66.78	81.21	51.15	48.9	63.11	79.6	86.63	51.93	82.24	66.85	58.18	71.63	71.39	60.42	82	88.79	51.27	58.23	79.47	54.88	60.14	59.96	55.11	130.41	91.49	94.86	88.09	122.85	119.46	121.99	105.15	129.81	85.11	82.35	96.53	124.91	135.85	78.28	140.15	100.78
73010	73010	Gpr22	0	0	0	0.03	0.01	0.13	0.77	0	0.77	0	0	0	0	0	0.14	0	0.01	0.26	0.01	0	0	0	0	0.07	0	0.09	0	0.01	0.11	0.01	0	0	0	0.04	0.01	0.22	1.33	0	1.23	0	0	0	0	0	0.21	0	0.01
104303	104303	Arl1	108.74	125.79	116.94	127.41	102.82	109.22	115.82	99.11	95.42	132.48	136.29	83.52	105.51	102.94	97.43	125.34	98.93	107.96	103.07	122.43	114.37	117.48	135.41	135.78	110.99	133.03	119.28	121.04	128.1	136.53	169.23	211.76	183.55	214.34	156.71	174.7	200.11	156.05	152.51	220.44	229.52	127.74	165.56	161.42	146.88	213.6	149.14
98685	98685	Trmt1l	11.85	11.94	12.32	10.75	13.1	12.44	14.61	13.24	14.1	11.01	12.43	12.22	12.44	12.72	10.1	14.44	11.32	9.65	13.54	16.46	13.43	14.72	12.63	11.65	11.94	13.99	11.56	12.97	11.03	11.31	18.44	20.11	19.33	18.08	19.96	19.9	25.24	20.84	22.54	18.31	20.93	18.69	19.53	19.95	15.22	24.61	17.07
67784	67784	Plxnd1	25.72	39.93	24.27	30.58	21.63	26.73	26.76	39.49	28.5	32.66	57.12	30.64	40.14	39.09	22.45	32.13	23.91	31.19	31.97	39.41	39.27	36.95	38.12	48.77	34.9	29.1	37.47	30.85	31.69	42.41	40.03	67.23	38.09	51.45	32.97	42.75	46.24	62.17	45.56	54.34	96.19	46.86	62.99	61.29	33.84	54.75	36.04
384534	384534	Vmn2r52	0	0	0	0	0	0.02	0	0.02	0	0	0	0	0	0	0	0	0	0	0.02	0	0	0	0	0	0	0	0	0	0	0	0	0	0	0	0	0.03	0	0.03	0	0	0	0	0	0	0	0	0
66887	66887	Lonp2	28.97	22.77	22.67	20.33	27.44	24.97	33.73	24.76	34.1	21.24	21.5	24.28	27.03	29.37	62.46	23.98	25.8	23.59	24.55	26.58	26.67	27.22	25.52	22.7	27.14	26.26	21.2	25.42	24.52	21.62	45.08	38.33	35.58	34.19	41.82	39.94	58.29	38.99	54.5	35.34	36.2	37.14	42.41	46.05	94.17	40.86	38.9
22184	22184	Zrsr2	10.13	10.69	10.42	10.19	9.19	9.68	10.8	10.59	10.44	10.3	11.04	9.57	9.62	10.44	7.86	9.8	9.55	9.35	10.55	14.03	11.29	12.14	11.01	11.07	9.6	12.03	11.06	9.98	9.19	10.78	15.77	18	16.35	17.14	14.01	15.49	18.66	16.68	16.69	17.13	18.6	14.64	15.1	16.37	11.84	16.71	14.39
243616	243616	Slc6a11	0	0.02	0.01	0.01	0	0.01	0	0	0.01	0.02	0	0.01	0.01	0.01	0	0.04	0	0.01	0	0	0	0.01	0.02	0.01	0	0	0.01	0.01	0.05	0.01	0	0.03	0.02	0.02	0	0.02	0	0	0.02	0.03	0	0.02	0.02	0.02	0	0.07	0
74918	74918	Iqca	0.01	0	0	0	0	0.01	0	0	0.07	0	0.01	0	0	0	0	0	0	0	0.01	0	0	0	0	0.01	0	0	0	0	0	0.02	0.02	0	0	0	0	0.02	0	0	0.12	0	0.02	0	0	0	0	0	0
66442	66442	Spc25	6.85	6.91	6.58	7.62	6.43	6.75	6.93	8.39	7.37	10.44	12.99	4.91	11.54	10.04	7.31	5.26	5.49	8.54	7.3	12.08	11.78	9.71	15.52	7.22	5.11	9.42	7.51	8.76	8.51	9.42	10.66	11.64	10.32	12.81	9.81	10.8	11.97	13.2	11.79	17.37	21.87	7.5	18.11	15.74	11.01	8.96	8.27
73412	73412	Nme8	0	0	0	0	0	0	0	0	0	0	0	0	0	0	0	0	0	0	0	0	0	0	0	0	0	0	0.04	0	0.04	0	0	0	0	0	0	0	0	0	0	0	0	0	0	0	0	0	0
238673	238673	Zfp367	6.3	5.51	6.07	6.11	5.26	5.77	8.93	6.9	8.71	5.05	5.59	6.37	8.57	7.24	7.26	5.44	6.27	7.1	7.87	4.16	6.91	5.65	9.37	5.63	6.28	3.99	6.33	5.97	7.22	6.02	9.81	9.28	9.52	10.29	8.02	9.23	15.43	10.86	13.92	8.4	9.41	9.74	13.45	11.35	10.95	9.28	9.45
18552	18552	Pcsk5	4.73	21.97	3.97	7.12	5.59	4.79	8.82	6.28	4.49	7.02	7.71	4.15	6.87	5.61	5.64	3.91	3.43	5.05	5.41	7.11	7.4	5.99	8.76	10.03	6.38	5.25	14.54	12.13	11.22	11.3	7.36	36.99	6.23	11.97	8.52	7.66	15.23	9.89	7.18	11.68	12.98	6.35	10.78	8.8	8.5	6.67	5.17
100039815	100039815	Gm2436	0.56	0.63	0.74	0.55	0.51	0.71	0.78	0.69	0.83	0.49	0.54	0.47	0.71	0.75	0.59	0.63	0.64	0.79	0.56	0.68	0.51	0.6	0.71	0.51	0.58	0.49	0.4	0.49	0.34	0.36	0.87	1.07	1.16	0.93	0.77	1.14	1.36	1.09	1.33	0.82	0.91	0.72	1.12	1.17	0.89	1.08	0.96
56294	56294	Ptpn9	11.92	16.59	8.89	13.52	8.41	12.32	17.29	13.24	11.87	13.03	16.17	7.53	10.8	11.01	9.5	8.95	8.17	10.87	10.76	23.17	12.15	11.66	12.88	16	12	19.58	11.57	12.67	12.93	15.29	18.55	27.92	13.96	22.74	12.82	19.7	29.87	20.84	18.97	21.69	27.24	11.52	16.95	17.26	14.32	15.25	12.32
106344	106344	Rfc4	7.21	5.07	5.08	5.66	5.19	4.79	5.14	7.03	5.59	6.06	8.33	5.23	7.4	8.15	4.98	5.62	5.86	5.4	5.29	7.28	6.36	6.37	10.25	5.56	5.63	4.31	6.46	8.06	5.45	7.39	11.21	8.53	7.97	9.52	7.91	7.67	8.89	11.06	8.93	10.09	14.03	8	11.62	12.78	7.51	9.58	8.84
434179	434179	Zfp975	2.19	1.6	1.79	1.99	1.99	1.95	2.82	2.46	2.46	1.85	1.79	2.33	2.28	2.69	2.08	2.1	2	1.71	2.43	2.41	2.46	2.64	2.46	2.25	2.15	2.28	1.95	1.79	1.55	1.81	3.41	2.69	2.81	3.35	3.03	3.11	4.86	3.87	3.94	3.08	3.01	3.56	3.58	4.22	3.13	3.58	3.02
338370	338370	Nalcn	0.03	0.09	0.02	0.05	0.02	0.12	0.86	0.02	0.7	0.05	0.06	0.05	0.02	0.02	0.06	0.08	0.04	0.22	0.01	0.02	0.1	0.11	0.03	0.08	0.04	0.09	0.05	0.03	0.1	0.05	0.04	0.16	0.03	0.08	0.03	0.2	1.48	0.03	1.11	0.09	0.1	0.07	0.04	0.02	0.09	0.14	0.07
21899	21899	Tlr6	1.4	1.51	1.47	1.78	1.36	1.46	1.39	1.41	1.03	2	2.51	2.1	2.41	1.34	1.33	2.52	1.58	1.4	1.83	2.2	2.56	1.87	1.66	3.68	2.52	2.02	2.15	2.29	1.33	2.34	2.18	2.54	2.3	3	2.07	2.33	2.4	2.22	1.64	3.33	4.22	3.21	3.78	2.09	2.01	4.3	2.39
102633888	102633888	Gm31606	0.03	0.03	0.04	0.04	0.05	0.04	0.03	0.04	0.03	0.02	0.03	0.04	0.03	0.05	0.03	0.03	0.04	0.03	0.05	0.04	0.02	0.04	0.03	0.04	0.03	0.04	0.04	0.04	0.03	0.03	0.05	0.05	0.07	0.06	0.08	0.07	0.05	0.06	0.05	0.04	0.05	0.05	0.05	0.07	0.04	0.04	0.07
17237	17237	Mgrn1	31.31	30.08	25.45	26.75	28.72	32.42	41.92	32.23	37.92	30.52	31.63	27.64	32.62	32	27.44	40.29	26.2	30.83	30.1	37.77	29.37	34.82	31.96	36.03	33.87	34.86	33.45	28.54	29.27	33.27	48.73	50.64	39.95	45.01	43.78	51.86	72.43	50.74	60.61	50.79	53.28	42.27	51.19	50.18	41.37	68.67	39.49
74666	74666	4930432K21Rik	0.6	0.26	0.36	0.26	0.27	0.38	0.34	0.28	0.46	0.19	0.24	0.46	0.34	0.37	0.26	0.44	0.34	0.25	0.28	0.3	0.25	0.33	0.4	0.26	0.58	0.31	0.38	0.3	0.31	0.32	0.94	0.44	0.56	0.44	0.4	0.61	0.59	0.43	0.73	0.31	0.41	0.7	0.53	0.57	0.39	0.75	0.52
30955	30955	Pik3cg	1.82	1.84	1.76	2.39	1.59	1.43	1.5	1.48	1.13	2.94	3.8	1.75	2.07	1.77	1.23	1.85	1.38	2.27	1.92	2.78	2.63	1.82	2.01	3.47	2.24	4.12	2.57	2.04	1.84	2.41	2.83	3.1	2.77	4.01	2.43	2.29	2.59	2.33	1.8	4.9	6.4	2.68	3.24	2.77	1.86	3.15	2.08
67712	67712	Slc25a37	11.95	13.77	12.4	14	10.44	10.68	15.71	11.99	12.81	9.94	14.37	12.63	15.04	12.2	11.39	13.05	12.48	11.08	15.47	18.36	15.93	15.4	11.93	15.4	13.29	14.09	12.18	11.95	10.96	14.92	18.59	23.19	19.46	23.55	15.91	17.08	27.15	18.88	20.47	16.53	24.19	19.31	23.6	19.13	17.17	22.24	18.82
381801	381801	Tatdn2	12.5	19.11	12.65	14.2	9.18	12.13	12.23	11.91	10.41	14.77	20.43	11	13.95	11.79	10.53	11.58	11.61	13.1	13	17.38	13.36	11.86	14	17.9	14.25	15.58	14.23	15.35	15.19	17.7	19.45	32.17	19.85	23.89	13.99	19.41	21.13	18.76	16.64	24.58	34.4	16.82	21.89	18.49	15.87	19.74	17.51
100737	100737	Dcun1d4	4.85	3.65	2.68	2.87	3.39	4.18	6.85	4.21	6.05	2.8	2.85	2.91	3.84	4.25	5.3	4.82	3.26	3.48	3.65	5.54	3.72	4.12	4.15	4.34	4.73	5.57	3.97	3.88	4	4.05	7.55	6.15	4.21	4.82	5.17	6.69	11.84	6.63	9.67	4.66	4.8	4.46	6.03	6.66	7.98	8.22	4.92
57875	57875	Angptl4	37.65	60.87	59.6	77.66	49.2	42.63	51	39.34	26.5	91.73	104.21	40.46	37.51	32.69	35.61	28.95	25.98	33.21	30.64	52.7	59.63	50.14	42.62	50.48	29.3	48.95	35.23	67.71	33.19	42.51	58.59	102.47	93.55	130.64	74.98	68.18	88.11	61.95	42.36	152.64	175.5	61.89	58.87	51.26	53.69	49.33	39.17
12557	12557	Cdh17	0.13	0.22	0.03	0.28	0.04	0.13	0.09	0.03	0	0.05	0.02	0.01	0.01	0.03	0.03	0.06	0.07	0.05	0.04	0.11	0.04	0.03	0.05	0.09	0.01	0.15	0.04	0.03	0.06	0.09	0.2	0.38	0.04	0.48	0.06	0.2	0.16	0.04	0	0.08	0.04	0.02	0.02	0.04	0.04	0.1	0.11
16005	16005	Igfals	1.29	0.53	0.42	0.54	0.69	1.14	0.14	0.86	0.75	0.5	0.56	1.6	1.04	0.88	29.97	0.08	0.71	0.61	1.33	0.12	0.59	0.13	0.77	0.6	0.75	0.26	0.91	1.34	0.48	0.67	2.01	0.9	0.66	0.91	1.05	1.82	0.25	1.36	1.19	0.84	0.94	2.45	1.62	1.38	45.18	0.14	1.07
12560	12560	Cdh3	7.83	22.97	15.33	19.55	4.49	11.44	17.92	6.55	11.85	19.57	30.09	4.77	9.29	5.97	6.88	4.44	6.32	14.75	4.86	9.84	11	8.73	12.63	17.57	10.11	16.01	11.36	22.33	22.26	18.28	12.19	38.67	24.07	32.89	6.84	18.29	30.97	10.31	18.95	32.56	50.67	7.29	14.58	9.36	10.38	7.57	9.53
56529	56529	Sec11a	84.44	86.09	69.12	74.66	66.34	73.77	93.27	73.69	78.72	85.43	82.3	55.65	79.51	75.5	73.27	60.23	60.57	73.51	63.08	118.4	86.45	90.11	84.17	77.04	68.37	94.28	69.36	86.74	82.21	81.68	131.41	144.93	108.49	125.59	101.1	118	161.16	116.02	125.81	142.16	138.61	85.12	124.77	118.39	110.47	102.63	91.31
22127	22127	Tsx	0.41	0.07	0	0.21	0.37	0.34	0.84	0.56	0.29	0.2	0.16	0.14	0.22	0.22	0.42	0.3	0.22	0	0.3	0.58	0.45	0.15	0	0.18	0.49	0.29	0.14	0.21	0.07	0.07	0.64	0.12	0	0.35	0.57	0.55	1.45	0.89	0.46	0.33	0.27	0.22	0.35	0.35	0.64	0.51	0.32
53897	53897	Gal3st1	1	0.38	0.24	0.08	0.52	0.97	0.65	0.56	0.55	0.29	0.16	0.24	0.18	0.64	0.71	0.12	0.26	0.51	0.8	2.05	0.38	0.49	0.74	0.45	0.48	1.49	0.79	0.22	0.2	0.53	1.56	0.64	0.37	0.14	0.8	1.55	1.12	0.89	0.88	0.49	0.26	0.37	0.29	1	1.08	0.2	0.39
109075	109075	Exosc4	17.25	14.14	15.74	13.23	17.49	14.88	16.98	15.43	16.78	14.08	15.51	14.54	15.64	16.64	14.29	19.49	14.33	14.64	15.3	17.14	16.43	18.78	15.33	13.42	13.77	13.3	13.77	16.48	12.63	14.56	26.84	23.8	24.71	22.25	26.66	23.8	29.33	24.29	26.82	23.43	26.12	22.24	24.54	26.1	21.55	33.21	21.6
241915	241915	Phc3	3.67	4.4	3.48	3.74	2.98	3.79	7.53	4.2	5.95	3.49	3.87	3.17	4.23	4.87	3.82	4.5	3.2	3.38	3.77	5.51	4.44	4.58	5.25	6.09	5.36	5.52	5.12	3.11	4.71	4.66	5.71	7.4	5.47	6.28	4.55	6.06	13.01	6.62	9.51	5.81	6.52	4.84	6.63	7.64	5.77	7.67	4.82
216197	216197	Ckap4	67.12	116.05	97.07	127.21	61.63	87	87.69	76.43	65.74	122.7	151.46	55.48	88.61	62.49	55.86	77.09	73.79	92.78	63.07	116.82	108.73	98.36	87.63	116.17	68.38	105.72	91.7	108.16	107.86	111.87	104.46	195.37	152.36	214.01	93.94	139.16	151.51	120.34	105.08	204.16	255.07	84.86	139.05	97.98	84.22	131.37	111.24
15559	15559	Htr2b	2.07	8.42	1.98	3.04	1.21	3.43	16.46	1.89	22.78	2.29	4.03	1.59	2.14	2.59	2.76	2.07	1.14	6.41	2.81	4.25	2.83	2.34	2.23	4.89	2.14	4.29	2.3	5.16	6.75	5.57	3.22	14.17	3.11	5.11	1.84	5.48	28.43	2.98	36.41	3.81	6.79	2.44	3.37	4.06	4.16	3.53	1.73
67582	67582	Slc25a26	8.34	6.92	8.48	6.92	9.17	7	6.87	8.7	8.37	6.34	6.1	9.51	7.35	8.85	7.24	8.13	9.88	8.79	8.93	5.71	6.8	7.81	8.13	5.17	8.88	4.68	7.1	7.13	6.44	6.5	12.97	11.66	13.31	11.64	13.98	11.2	11.86	13.7	13.39	10.54	10.27	14.54	11.53	13.87	10.92	13.86	14.9
171185	171185	Vmn1r35	0	0	0	0	0	0	0	0	0	0	0	0	0	0	0	0	0	0	0	0	0	0	0	0	0	0.06	0	0	0	0.06	0	0	0	0	0	0	0	0	0	0	0	0	0	0	0	0	0
106957	106957	Slc39a6	11.35	18.14	10.93	17.7	8.82	11.18	14.61	11.66	11.4	13.76	14.66	7.78	11.58	10.54	7.38	8.84	9.09	11.96	10.81	22.28	12.92	12.44	12.56	13.53	10.22	16.88	11.41	13.14	15.6	15.76	17.66	30.54	17.16	29.77	13.44	17.87	25.25	18.36	18.21	22.9	24.69	11.9	18.18	16.52	11.12	15.06	13.7
13488	13488	Drd1	0.05	0.1	0.06	0.08	0.05	0.09	0.01	0.1	0.05	0.06	0.05	0.05	0.04	0.01	0.04	0.1	0.04	0.03	0.02	0.01	0.06	0.09	0.11	0.11	0.12	0.09	0.05	0.07	0.07	0.03	0.07	0.17	0.09	0.13	0.07	0.14	0.02	0.16	0.08	0.09	0.08	0.07	0.06	0.02	0.05	0.16	0.05
22697	22697	Zscan21	14.14	12.4	12.12	11.68	13.37	12.61	14.67	13.7	14.3	11.68	11.06	12.99	13.43	14.49	11.97	14.81	12.97	12.04	14.37	15.56	13.15	15.53	11.55	11.48	12.57	13.28	12.31	11.4	10.35	12.38	22.01	20.88	19.02	19.65	20.38	20.16	25.34	21.57	22.86	19.44	18.63	19.87	21.08	22.71	18.04	25.24	19.55
12468	12468	Cct7	70.18	62.17	56.52	58.21	65.8	64.31	72.28	65.98	72.69	61.07	73.98	59.77	65.85	70.73	56.49	70.99	60.58	60.88	61.45	76.05	60.59	74.03	78.71	58.39	58.47	65.35	59.09	69.11	60.07	64.49	109.22	104.66	88.72	97.92	100.29	102.87	124.89	103.88	116.19	101.62	124.59	91.42	103.34	110.91	85.16	120.98	91.33
73162	73162	Otud3	9.16	9.11	8.63	8	10.1	8.68	7.12	8.66	8.28	7.71	7.82	8.41	7.6	8.8	6.7	10.12	7.86	6.77	7.67	9.27	6.68	7.44	9.15	8.79	9.44	13.84	8.29	7.29	8.58	9.55	14.25	15.33	13.55	13.46	15.4	13.89	12.3	13.63	13.23	12.82	13.18	12.87	11.93	13.8	10.1	17.25	11.85
68346	68346	Sirt5	6.6	4.96	6.37	5.08	7.29	5.84	5.8	5.4	7.14	5.57	4.41	6.19	5.94	5.41	7.74	7.56	6.96	5.22	4.5	4.54	6.02	6.9	6.35	4.26	5.54	3.55	6.91	4.39	4.87	3.49	10.28	8.35	10	8.55	11.1	9.34	10.03	8.51	11.42	9.27	7.43	9.47	9.31	8.48	11.66	12.88	10.5
328699	328699	Gabrr3	0	0	0	0	0	0.06	0	0	0	0	0	0	0	0	0	0	0	0	0	0	0	0	0	0	0	0	0	0	0.03	0	0	0	0	0	0	0.1	0	0	0	0	0	0	0	0	0	0	0
13505	13505	Dsc1	0	0	0	0	0	0	0.01	0	0	0	0	0	0	0	0	0	0	0	0	0	0	0	0.01	0.01	0	0.01	0	0	0	0	0	0	0	0	0	0	0.02	0	0	0	0	0	0	0	0	0	0
224111	224111	Ubxn7	4.72	5.76	3.62	4.48	4.37	4.49	6.36	5.44	5.52	4.94	4.98	4.04	5.1	5.93	4.3	5.54	4.41	4.43	5.55	7.31	5.55	5.76	5.83	5.47	5.28	6.28	5.38	4.09	4.85	5.83	7.35	9.7	5.68	7.54	6.66	7.19	10.98	8.57	8.83	8.23	8.39	6.17	8	9.3	6.48	9.45	6.64
103213	103213	Traf3ip2	8.26	4.78	2.83	3.87	4.84	6.28	10	6.31	7.74	5.68	4.91	2.72	7.62	7.94	5.84	2.15	3.79	5.68	5.39	9.53	6.8	6.11	9.51	6.52	6.63	10.12	6.59	5.78	5.9	7.37	12.86	8.05	4.44	6.51	7.38	10.04	17.28	9.94	12.37	9.45	8.26	4.17	11.96	12.45	8.81	3.66	5.71
69717	69717	Gm10499	0.06	0	0.19	0.12	0	0.16	0.28	0.13	0.08	0.17	0.21	0.2	0.21	0.1	0.28	0.06	0.08	0.08	0.18	0.21	0.12	0.1	0.11	0.36	0.12	0.22	0.15	0.14	0.18	0.24	0.09	0	0.3	0.2	0	0.25	0.48	0.2	0.13	0.28	0.35	0.3	0.34	0.16	0.42	0.1	0.12
26380	26380	Esrrb	0.69	0.97	0.88	0.63	1.65	0.95	0.92	0.73	1.76	0.59	0.53	1.87	0.98	0.7	0.72	1.3	1.42	0.99	1.05	0	0.55	0.87	0.92	0.57	0.96	0.11	0.89	0.89	0.93	0.69	1.07	1.63	1.38	1.06	2.52	1.52	1.6	1.16	2.81	0.98	0.89	2.86	1.54	1.1	1.09	2.21	2.14
14073	14073	Faah	3.35	0.24	0.24	0.41	1.62	1.8	1.27	0.93	1.55	0.77	0.39	0.31	0.91	1.7	18.17	0.11	0.57	0.39	1.2	4	0.83	0.96	1.46	1.01	0.96	3.7	0.91	0.29	0.53	1.11	5.22	0.41	0.38	0.68	2.48	2.89	2.2	1.47	2.48	1.29	0.65	0.47	1.42	2.66	27.39	0.19	0.85
67621	67621	Bend5	3.23	0.56	0.58	0.77	2.13	2.9	11.52	2.26	12.91	1.34	0.8	1.42	2.3	3.08	3.65	1.09	1.98	3.22	1.74	4.15	2.45	2.37	1.68	3.47	2.45	3.83	2.24	1.04	3.76	1.69	5.03	0.94	0.91	1.3	3.25	4.64	19.91	3.55	20.64	2.24	1.35	2.17	3.61	4.84	5.5	1.87	2.98
211961	211961	Asxl3	0.24	0.04	0.03	0.04	0.09	0.12	0.26	0.22	0.17	0.05	0.02	0.07	0.12	0.25	0.11	0.03	0.07	0.12	0.21	0.27	0.14	0.12	0.2	0.15	0.24	0.17	0.21	0.07	0.06	0.12	0.38	0.07	0.04	0.07	0.14	0.2	0.46	0.35	0.27	0.08	0.03	0.11	0.19	0.4	0.17	0.05	0.11
12572	12572	Cdk7	5.52	5.5	4.25	4.66	4.11	5.18	5.89	5.29	4.93	4.94	5.63	3.86	5.21	5.17	4	4.71	4.19	4.48	4.82	7.47	4.86	5.32	6.03	6.35	5.85	6.55	6.21	5.26	5.09	6.09	8.59	9.27	6.68	7.85	6.27	8.28	10.17	8.34	7.88	8.21	9.48	5.91	8.17	8.1	6.02	8.02	6.32
108169183	108169183	LOC108169183	0.11	0	0	0	0	0.1	0	0	0	0	0	0	0.11	0	0	0	0	0	0	0	0.22	0	0	0	0	0.11	0	0	0	0	0.16	0	0	0	0	0.16	0	0	0	0	0	0	0.17	0	0	0	0
71889	71889	Epn3	2.99	0.06	0.24	0.18	2.5	1.49	1.05	1.23	1.05	0.25	0.18	0.09	0.65	2.18	0.69	0.05	0.62	0.54	1.01	5.29	0.7	1.13	3.71	0.87	0.83	5.24	0.89	0.43	0.43	1.17	4.65	0.11	0.38	0.3	3.81	2.39	1.82	1.93	1.68	0.41	0.3	0.14	1.03	3.41	1.04	0.08	0.94
19660	19660	Rbp2	0	0.55	0.28	0.8	0.28	0.17	0.43	0.36	0.2	0.54	0.09	0.19	0.38	0	0.09	0	0.64	0.63	0.19	0.27	0.96	0.68	1.6	0.37	0.35	0.64	0.36	0.53	0.27	0.52	0	0.93	0.44	1.34	0.43	0.28	0.74	0.56	0.33	0.89	0.15	0.29	0.59	0	0.14	0	0.96
67665	67665	Dctn4	16.92	17.22	14.89	16.83	14.6	15.91	23.25	16.65	20.61	16.56	17.75	13.7	16.41	16.43	14.08	17.98	14.12	16.62	15.03	22.67	17.55	18.72	19.27	19.4	18.49	23.01	16.54	16.89	18.16	16.97	26.33	29	23.37	28.32	22.25	25.45	40.18	26.22	32.94	27.56	29.9	20.96	25.76	25.77	21.23	30.64	21.28
76282	76282	Gpt	10.75	6.55	12.46	8.82	14.3	12.62	4.15	9.66	8.48	7.66	6.02	12.55	8.07	8.98	57.28	8.73	12.85	8.55	9.85	3.26	7.68	7.93	6.85	5.15	10.37	3.13	9.23	8.81	7.45	4.75	16.72	11.03	19.55	14.84	21.8	20.19	7.17	15.22	13.55	12.75	10.13	19.2	12.66	14.09	86.36	14.88	19.37
15356	15356	Hmgcl	23.71	25.49	27.71	25.43	26.78	26.37	25.13	24.03	26.53	27.56	28.54	27.9	31.69	27.74	80.57	30.71	28.81	33.34	28.83	25.66	33.15	28.55	27.38	27.99	30.07	24.27	28.49	32.68	27.28	27.44	36.9	42.91	43.49	42.78	40.81	42.17	43.42	37.84	42.41	45.87	48.06	42.68	49.73	43.5	121.47	52.33	43.43
76897	76897	Ralyl	0	0	0.01	0.02	0	0.14	0.63	0	0.91	0.01	0	0	0.01	0	0.07	0	0	0.11	0	0.02	0	0	0.02	0.07	0	0.2	0	0	0.13	0	0	0	0.02	0.03	0	0.23	1.09	0	1.45	0.02	0	0	0.02	0	0.1	0	0
79456	79456	Recql4	1.09	0.68	0.96	0.9	0.64	0.54	0.87	0.92	0.94	0.74	1.52	0.76	1.26	0.99	0.78	1.2	0.71	0.63	0.84	1.64	1.05	1.23	1.52	0.97	0.99	0.89	1.05	0.82	0.75	0.93	1.69	1.15	1.51	1.51	0.98	0.87	1.5	1.45	1.5	1.24	2.55	1.16	1.98	1.56	1.17	2.04	1.07
11692	11692	Gfer	15.53	11.63	14.85	10.76	15.37	13.73	9.94	13.75	10.26	11.98	11.8	15.97	12.72	14.73	15.06	14.26	12.65	12.67	14.58	13.04	12.19	12.32	13.3	10.94	12.94	11.39	12.67	13.57	13.41	12.44	24.17	19.58	23.31	18.11	23.43	21.97	17.17	21.65	16.39	19.94	19.88	24.42	19.97	23.1	22.71	24.3	19.07
67344	67344	Tctex1d1	0	0	0	0	0	0.02	0.07	0.06	0	0	0	0	0	0	0	0	0	0	0.07	0	0.12	0	0.06	0	0	0	0	0.05	0	0	0	0	0	0	0	0.04	0.12	0.09	0	0	0	0	0	0	0	0	0
76947	76947	Ndufaf6	9.15	6.65	9.52	8.16	9.23	9.47	7.17	8.26	8.68	6.15	6.97	9.02	8.46	9.01	9.81	8.2	10.7	9.21	10.23	5.16	5.9	6.65	7.74	5.29	6.8	4.04	8.02	8.06	6.98	6.78	14.25	11.19	14.95	13.72	14.07	15.15	12.39	13.01	13.87	10.24	11.73	13.79	13.27	14.13	14.79	13.97	16.13
68188	68188	Sympk	31.38	28.25	24.8	25.42	26.16	26.41	25.86	25.92	25.55	26.32	28.39	23.64	25.17	26.54	21.98	33.33	20.54	23.11	22.06	29.01	23.23	26.39	27.42	27.26	28.17	30.26	27.44	25.08	25.76	29.54	48.84	47.56	38.93	42.77	39.88	42.24	44.68	40.81	40.84	43.8	47.81	36.17	39.5	41.61	33.14	56.79	30.96
245671	245671	Klf8	0.46	0.47	0.3	0.35	0.3	0.48	0.74	0.66	0.71	0.3	0.43	0.51	0.75	0.7	0.39	0.48	0.32	0.57	0.7	0.88	0.76	0.62	0.72	0.71	0.73	0.54	0.77	0.28	0.48	0.64	0.72	0.8	0.48	0.58	0.45	0.76	1.28	1.03	1.14	0.5	0.72	0.78	1.18	1.1	0.59	0.82	0.48
52120	52120	Hgsnat	16.77	23.6	15.91	20.46	12.47	16.55	18.71	14.42	16.44	19.92	27.28	13.79	16.7	15.88	16.9	15.08	13.83	17.39	16.29	21.21	17.29	14.27	16.26	20.01	17.31	17.52	17.83	25.04	19.32	21.36	26.09	39.73	24.97	34.43	19.01	26.47	32.33	22.71	26.27	33.15	45.95	21.09	26.21	24.89	25.47	25.7	20.85
328795	328795	Ubash3a	0.11	0	0.11	0.13	0.03	0.12	0.15	0.01	0.03	0.09	0.22	0.1	0.07	0.07	0.01	0.01	0.06	0.08	0.03	0.04	0.07	0.07	0.06	0.14	0.19	0.16	0.21	0.14	0.04	0.27	0.17	0	0.18	0.23	0.04	0.19	0.26	0.02	0.04	0.16	0.36	0.16	0.11	0.12	0.02	0.02	0.09
75668	75668	Rasl10a	1.11	1.69	2.34	1.89	1.64	1.93	2.31	0.64	1.56	4.15	1.01	0.98	1.67	0.83	0.79	2.59	1.54	2	1.67	1.04	0.98	1.46	1.16	1.47	1.28	2.78	1.03	1.49	2.51	1.49	1.73	2.85	3.67	3.18	2.5	3.09	4	1.01	2.49	6.91	1.71	1.5	2.62	1.31	1.19	4.41	2.33
72401	72401	Slc43a1	5.44	5.04	5.87	4.96	5.73	6.17	4.14	6.21	5.22	4.46	7.18	5.48	6.35	5.85	5.9	5.26	4.89	4.97	5.22	5.51	5.83	5.95	4.77	6.01	5.02	4.47	4.65	5.06	4.53	5.08	8.46	8.49	9.22	8.35	8.73	9.88	7.15	9.78	8.35	7.43	12.09	8.39	9.96	9.17	8.89	8.96	7.37
242553	242553	Kank4	0.91	0.68	0.2	0.22	0.48	0.83	1.29	2.14	1.05	0.38	0.87	0.54	1.1	1	0.6	0.35	0.61	0.65	1.16	1.21	0.81	0.8	0.89	0.93	0.87	0.52	0.95	0.26	0.66	0.93	1.42	1.15	0.32	0.38	0.74	1.32	2.23	3.37	1.68	0.63	1.47	0.83	1.73	1.56	0.9	0.59	0.92
71957	71957	Ints11	12.4	13.36	11.78	11.83	11.97	11.29	11.84	12.37	11	13.26	13.42	11.26	12.99	13.16	10.38	14.41	10.87	10.55	10.58	16.75	12.2	15.28	13.43	12.37	12.02	13.13	11.07	13.96	11.83	13.05	19.3	22.5	18.5	19.9	18.25	18.06	20.45	19.47	17.59	22.06	22.61	17.23	20.39	20.64	15.64	24.56	16.39
115486128	115486128	LOC115486128	2.81	1.58	0.68	0.78	1.27	1.67	2.61	3.14	1.51	1.16	1.77	1.29	2.28	2.73	1.52	1.55	1.21	1.34	2.16	4.47	2.44	2.24	2.32	2.3	2	2.69	2.04	1.67	1.49	2.39	4.38	2.65	1.06	1.32	1.93	2.67	4.51	4.94	2.42	1.94	2.98	1.97	3.58	4.29	2.29	2.65	1.83
217116	217116	Spata20	0	0	0	0.02	0	0.05	0.04	0.02	0.02	0.03	0.06	0	0	0.08	0.02	0	0	0	0	0.02	0	0	0.06	0	0	0	0	0.03	0	0.02	0	0	0	0.03	0	0.07	0.07	0.02	0.03	0.05	0.11	0	0	0.13	0.02	0	0
11836	11836	Araf	47.69	44.54	46.41	41.84	53.61	45.77	52.94	42.95	55.18	38.09	37.74	53.19	46.6	49.83	43.05	54.57	50.09	43.57	51.52	42.75	44.27	55.41	45.98	37.68	42.82	38.28	41.66	45.38	41.53	39.02	74.23	74.98	72.85	70.39	81.71	73.2	91.47	67.63	88.2	63.39	63.56	81.36	73.13	78.14	64.9	93	75.51
109676	109676	Ank2	4	4.49	5.09	5.82	4.32	5.43	10.22	3.92	8.65	4.69	3.26	4.41	3.88	3.91	2.94	4.45	4.31	4.03	4.28	3.74	4.81	4.24	4.66	4.72	6.7	5.67	5.98	4.39	4.86	4.39	6.23	7.56	7.98	9.8	6.58	8.69	17.66	6.17	13.82	7.8	5.49	6.75	6.08	6.12	4.43	7.59	6.5
72640	72640	Mex3a	8.15	6.02	3.48	4.12	4.91	6.62	6.34	8.85	3.64	3.87	6.69	3.13	5.5	7.95	3.65	3.76	4.1	4.78	6.42	15.6	7.25	6.93	4.98	7	7.54	13.27	6.5	3.73	4.17	6.5	12.69	10.14	5.46	6.93	7.48	10.58	10.96	13.94	5.82	6.44	11.26	4.79	8.63	12.47	5.5	6.41	6.18
67118	67118	Bfar	18.78	19.68	19.65	20.39	19.64	19.73	18.9	18.52	20.9	20.49	18.77	18.03	19.46	17.59	18.97	20.91	19.55	19.8	19.5	20.96	20.01	22.07	17.12	18.85	18.53	19.12	18.46	19.86	18.12	19.18	29.23	33.13	30.85	34.3	29.93	31.55	32.65	29.17	33.41	34.09	31.6	27.57	30.54	27.59	28.61	35.63	29.47
115487110	115487110	LOC115487110	9.75	6.68	3.17	2.67	5.24	8.02	8.96	8.48	10.87	5.74	4.08	5.53	6.18	9.3	5.08	2.83	5.79	7.39	7.01	11.23	11.02	5.62	8.52	6.43	10.28	10.07	9.62	6.12	5.08	7.14	15.18	11.25	4.98	4.49	7.99	12.82	15.48	13.35	17.37	9.55	6.87	8.46	9.69	14.58	7.66	4.82	8.73
244579	244579	Tox3	0.68	0.69	0.06	0.18	0.18	0.41	0.59	0.54	0.5	0.05	0.06	0.23	0.37	0.45	0.17	0.04	0.07	0.22	0.28	0.96	0.41	0.32	0.24	0.35	0.52	0.6	0.26	0.14	0.28	0.17	1.06	1.16	0.09	0.31	0.27	0.66	1.02	0.84	0.8	0.08	0.09	0.35	0.58	0.71	0.26	0.07	0.1
105663	105663	Thtpa	10.54	7.22	6.71	5.92	7.74	8.1	9.37	8.33	8.82	7.04	5.81	7.16	7.99	9.09	9.23	9.94	8.11	7.38	6.88	9	7.72	9.99	9.27	6.92	9.18	9.48	8.64	7.97	7.64	7.63	16.4	12.15	10.54	9.97	11.79	12.95	16.19	13.12	14.1	11.71	9.78	10.95	12.54	14.25	13.92	16.94	12.23
22153	22153	Tubb4a	17.58	15.4	1.37	3.16	4.02	10.02	21.76	14.12	18.81	2.96	1.93	4.33	9.71	11.79	7.31	0.67	3.39	9.25	10.1	21.34	8.75	6.43	7.93	10.03	11.77	14.24	8.37	5.54	7.1	10.4	27.36	25.92	2.15	5.31	6.12	16.03	37.6	22.23	30.07	4.93	3.26	6.62	15.23	18.49	11.01	1.15	5.12
11699	11699	Ambp	0.15	0.08	0.08	0	0	0	0.09	0	0	0.04	0.15	0.04	0.08	1.29	1291.83	0.15	0.04	0.04	0.04	0.04	0.16	0.08	0.04	0.22	0.04	0.04	0.07	0.11	0.07	0.07	0.23	0.13	0.12	0	0	0	0.15	0	0	0.06	0.24	0.06	0.12	2.02	1947.52	0.26	0.06
66397	66397	Sar1b	224.7	135.17	196.99	118.43	197.11	169.78	67.91	175.08	140.38	102.68	105.39	222.07	149.36	196.56	168.54	81.08	173.95	175.74	201.44	39.74	136.52	73.53	119.23	89.23	127.64	48.67	104.43	129.25	149.87	88.86	349.7	227.56	309.2	199.24	300.41	271.56	117.33	275.67	224.38	170.86	177.48	339.66	234.38	308.22	254.08	138.17	262.23
230761	230761	Zfp362	20.17	11.52	8.27	9.69	11.82	14.08	15.91	17.14	13.5	12.02	13.82	9.62	15.01	16.69	10.98	10.54	10	11.47	14.23	23.93	14.63	14.79	14.97	14.36	15.66	18.97	15.29	12.05	10.94	15.2	31.39	19.39	12.99	16.31	18.01	22.53	27.49	26.99	21.57	20	23.28	14.71	23.55	26.17	16.55	17.95	15.07
260302	260302	Gga3	10.16	8.75	8.4	9.23	9.45	9.12	12.04	9.81	9.85	8.82	10.71	9.09	10.79	10.43	7.48	10.73	7.4	8.07	10.71	15.42	10.61	11.08	9.88	11.97	11.2	11.26	11.04	8.78	8.64	9.59	15.81	14.73	13.19	15.53	14.4	14.59	20.81	15.44	15.74	14.67	18.04	13.9	16.93	16.35	11.27	18.28	11.16
208634	208634	Tspan10	0.37	0.19	0.1	0	0.2	0.14	0.15	0.16	0.09	0.04	0	0.22	0.04	0.48	0.06	0.04	0.23	0.29	0.4	0.43	0.15	0.11	0.11	0.21	0.18	0.1	0.14	0.14	0.04	0.14	0.58	0.32	0.16	0	0.3	0.22	0.26	0.26	0.15	0.07	0	0.33	0.07	0.75	0.1	0.07	0.35
17841	17841	Mup2	0.17	0.72	1.09	0.17	0	0.69	0	0.96	0	0.84	0.43	0.09	0	0.78	341.9	0.12	0	0.34	0.19	0	0.12	0	0	0.45	0.17	0.28	1.05	2.81	0.73	0.59	0.27	1.22	1.72	0.28	0	1.1	0	1.51	0	1.39	0.73	0.13	0	1.22	515.44	0.21	0
73419	73419	Armt1	10.46	9.15	9.55	7.71	10.62	9.33	6.94	9.99	8.98	7.66	9.48	11.03	10.71	9.54	7.32	10.74	9.58	7.87	9.21	8.57	9.8	8.83	9.48	7.94	9.17	7.4	8.66	10.25	8.33	8.32	16.27	15.4	14.99	12.98	16.19	14.92	11.99	15.74	14.36	12.75	15.96	16.87	16.8	14.96	11.04	18.3	14.44
71766	71766	Raver1	19.86	17.32	13.82	16.73	14.19	17.61	20.95	17.07	17.2	17.8	22.69	11.41	16.75	18.18	12.77	18.04	12.08	15.23	14	25.85	16.15	17.88	23.09	22.26	18.29	25.01	20.29	18.95	16.68	21.63	30.9	29.16	21.7	28.14	21.63	28.17	36.19	26.88	27.49	29.62	38.22	17.45	26.29	28.51	19.26	30.75	18.21
272322	272322	Arntl2	4.29	3.46	2.32	2.49	3.22	3.6	4.95	4.39	5.22	2.95	3.34	2.57	3.91	4.4	2.73	2.59	2.46	2.45	3.53	8.41	4.88	3.71	3.19	4	3.55	6.37	3.24	3.61	2.93	3.26	6.67	5.82	3.64	4.18	4.91	5.76	8.55	6.92	8.35	4.9	5.62	3.93	6.13	6.91	4.12	4.42	3.71
22756	22756	Zfp94	1.17	1.13	1.04	1.12	1.23	1.13	1.72	1.44	1.35	1.14	1.02	1.18	1.31	1.28	0.78	1.73	1.1	0.91	1.13	1.35	1.2	1.41	1.51	1.27	1.52	1.48	1.14	1.27	0.97	1.02	1.82	1.9	1.64	1.89	1.88	1.8	2.97	2.27	2.15	1.9	1.72	1.8	2.06	2	1.18	2.94	1.66
78825	78825	Desi2	12.15	13.26	11.81	13.06	11.73	12.5	12.93	13.02	10.97	13.12	12.23	12.07	11.8	11.9	10.04	15.76	11.85	11.88	11.66	11.93	13.25	14.23	14.99	13.14	13.22	13.03	13.13	11.92	12.71	13.63	18.9	22.32	18.53	21.97	17.88	19.99	22.34	20.5	17.53	21.84	20.6	18.46	18.52	18.67	15.14	26.86	17.87
108657	108657	Rnpepl1	25.05	25.45	25	24.9	24.77	24.66	23.48	23.13	25.05	27.71	24.34	23.57	23.27	24.93	25.23	27.43	20.89	22.37	21.06	25.35	21.97	25.02	22.9	26.46	24.63	28.11	25.11	26.03	26.67	24.89	38.98	42.85	39.24	41.88	37.75	39.44	40.58	36.42	40.04	46.11	40.99	36.04	36.52	39.09	38.04	46.75	31.49
56299	56299	Fkbpl	5.23	4.11	4.06	3.77	4.68	3.8	5.74	4.67	5.44	4.31	4.45	4.98	4.9	4.8	4.09	4.95	4.78	4.62	4.37	6.68	5.09	6.43	5.33	4.56	3.95	4.57	4.28	4.78	4.69	4.21	8.13	6.92	6.38	6.34	7.14	6.08	9.92	7.36	8.69	7.17	7.49	7.62	7.69	7.53	6.17	8.44	7.21
67122	67122	Nrarp	5.3	10.59	6.32	7.66	5.22	8.01	10.18	12.13	11.99	7.96	7.52	7.75	9.6	11.23	5.72	7.3	6.26	7.09	7.07	9.31	10.53	11.54	9.89	8.17	6.28	6.38	7.4	8.67	8	8.54	8.24	17.82	9.92	12.88	7.96	12.82	17.58	19.1	19.17	13.25	12.67	11.85	15.06	17.61	8.62	12.43	9.43
14158	14158	Fer	4.94	11.03	7.69	8.7	5.45	6.45	10.79	6.15	8.8	7.46	6.71	5.72	5.99	6.52	5.52	7.36	6.06	6.64	5.95	7.89	7.01	7.57	7.67	7.48	5.97	6.77	7.15	8.51	8.24	8.23	7.69	18.56	12.07	14.63	8.3	10.32	18.65	9.69	14.07	12.41	11.3	8.75	9.4	10.22	8.33	12.53	9.13
233186	233186	Siglecf	0.73	0.1	0.12	0.14	0.21	0.19	0.25	0.39	0.15	0.21	0.36	0.96	0.69	0.3	0.45	0.24	0.42	0.72	0.65	0.77	0.84	0.11	0.55	0.88	0.75	0.86	0.41	0.37	0.2	0.53	1.13	0.17	0.18	0.24	0.31	0.31	0.44	0.62	0.24	0.35	0.6	1.46	1.08	0.47	0.69	0.41	0.63
545938	545938	Zfp607a	0.67	1.17	0.71	0.77	0.67	0.92	1.11	0.95	0.92	1.02	1.15	0.78	1.05	1.36	0.87	1.13	0.89	0.86	0.96	0.98	0.96	0.93	1.69	1.59	1.07	1.23	1.28	0.98	1.06	1.33	1.04	1.96	1.11	1.29	1.02	1.46	1.93	1.49	1.46	1.7	1.94	1.2	1.64	2.13	1.31	1.92	1.34
16399	16399	Itga2b	1.25	1.63	1.69	1.99	1.54	1.44	3.1	0.99	2.57	2.54	1.48	1.07	1.36	0.85	1.3	1.93	1.46	1.25	1.47	1	1.54	2.02	1.65	1.82	1.64	1.7	1.38	2.49	1.84	1.13	1.94	2.74	2.65	3.35	2.35	2.31	5.36	1.56	4.11	4.22	2.49	1.64	2.13	1.33	1.96	3.29	2.2
12294	12294	Cacna2d3	0.66	0.16	0.13	0.2	1.17	1.31	2.73	0.48	2.89	0.17	0.03	0.29	0.45	0.66	0.79	0.28	0.21	0.63	0.53	1.22	0.57	0.39	2.49	0.42	0.56	3.17	0.73	0.49	0.68	0.75	1.02	0.28	0.21	0.34	1.78	2.1	4.72	0.75	4.63	0.28	0.05	0.44	0.7	1.04	1.2	0.48	0.32
71746	71746	Rgl3	10.87	2.94	2.25	2.4	9.06	5.9	4.91	6.52	4.74	3.26	4.4	3.45	5	7.92	8.58	4.13	2.96	3.4	5.41	21.51	7.12	6.43	5.66	5.43	5.65	20.88	4.54	3.28	3.48	6.31	16.91	4.94	3.53	4.04	13.81	9.44	8.48	10.27	7.58	5.43	7.42	5.28	7.84	12.43	12.94	7.04	4.47
235379	235379	Gldn	0.09	0.25	0.15	0.1	0.13	0.14	0.11	0.19	0.09	0.17	0.13	0.13	0.18	0.16	0.19	0.5	0.2	0.18	0.16	0.03	0.09	0.38	0.16	0.15	0.11	0.04	0.24	0.15	0.15	0.17	0.15	0.42	0.23	0.17	0.2	0.22	0.19	0.29	0.14	0.28	0.22	0.19	0.28	0.25	0.29	0.86	0.3
20607	20607	Sstr3	0.08	0.04	0.03	0.02	0.03	0.06	0.12	0.03	0.02	0.01	0.01	0.03	0.01	0.01	0.02	0.03	0.04	0.08	0.04	0	0.02	0	0	0.01	0.03	0.03	0.02	0.01	0.08	0.01	0.13	0.07	0.05	0.03	0.05	0.09	0.21	0.05	0.04	0.02	0.02	0.05	0.02	0.02	0.03	0.05	0.06
214444	214444	Cdk5rap2	1.91	1.51	1.52	1.92	1.35	1.66	2.03	1.76	1.82	1.83	2.48	1.29	1.88	1.73	1.3	1.96	1.36	1.46	1.49	2.25	1.87	1.86	2.77	2.2	2.1	2.13	2.13	1.54	1.71	2.13	2.98	2.54	2.38	3.23	2.06	2.66	3.51	2.77	2.9	3.05	4.17	1.98	2.94	2.72	1.96	3.35	2.05
16872	16872	Lhx4	0.02	0.01	0.05	0.02	0	0.02	0.06	0	0.02	0.04	0.02	0.01	0.01	0.01	0	0.05	0	0	0.03	0.02	0.03	0.02	0	0.04	0.08	0.08	0	0.02	0.05	0.01	0.04	0.02	0.07	0.04	0	0.03	0.1	0	0.03	0.07	0.04	0.01	0.01	0.01	0	0.08	0
18441	18441	P2ry1	3.9	1.84	1.49	1.22	2.32	3.13	4.45	3.42	4	1.2	1.16	2.93	3.36	3.96	3.49	1.99	2.92	3.14	3.54	3.45	2.91	2.27	5.06	3.34	3.64	3.48	3.89	1.56	2.42	3.52	6.06	3.1	2.34	2.05	3.54	5.01	7.69	5.39	6.39	2	1.96	4.49	5.27	6.21	5.27	3.39	4.41
67886	67886	Camsap2	5.18	7.74	5.02	6.79	3.71	5.01	9.37	5.88	6.8	5.83	7.05	3.8	5.62	5.53	4.39	5.97	4.57	5.17	5.62	7.79	5.69	6.16	6.75	8.47	6.7	8.85	7.04	4.82	6.99	7.24	8.06	13.04	7.88	11.42	5.66	8.01	16.19	9.25	10.87	9.7	11.87	5.81	8.82	8.67	6.61	10.18	6.89
13590	13590	Lefty1	1.95	1.19	1.45	1.41	1.18	1.78	1.89	1.76	2.25	2.59	1.47	1.03	2	1.25	1.32	1.2	1.06	1.82	1.41	2.07	1.52	1.77	2.09	1.74	1.9	1.37	1.63	2.18	1.67	1.68	3.04	2.01	2.27	2.37	1.79	2.84	3.27	2.78	3.59	4.32	2.48	1.58	3.14	1.95	1.99	2.05	1.6
76219	76219	Arxes1	1.65	1.01	0.33	0.7	1.09	1.29	3.71	2.17	2.17	0.66	0.98	0.82	1.69	1.78	0.89	0.93	1.14	1.15	1.81	2.52	1.92	1.2	1.53	1.6	1.02	1.23	1.16	0.84	1.18	1.06	2.57	1.71	0.51	1.18	1.66	2.07	6.41	3.42	3.47	1.1	1.65	1.25	2.66	2.79	1.35	1.58	1.71
16637	16637	Klra6	0.07	0.05	0.07	0.04	0.05	0.05	0	0	0	0.07	0.14	0.07	0	0.07	0	0	0	0.07	0	0.05	0	0.08	0	0.09	0	0.04	0	0.05	0	0	0.11	0.08	0.11	0.07	0.07	0.08	0	0	0	0.11	0.23	0.11	0	0.12	0	0	0
67025	67025	Rpl11	470.31	371.28	359.66	346.28	413.37	370.53	387.48	423.15	350.07	406.39	453.85	357.14	425.71	434.36	357.98	420.25	358.44	370.69	398.92	548.79	482.53	509.82	437.02	347.94	355.18	428.26	337.66	431.2	356.8	381.51	731.93	625.05	564.55	582.54	630.01	592.66	669.48	666.27	559.53	676.22	764.32	546.25	668.03	681.1	539.68	716.17	540.37
259300	259300	Ehd2	46.23	68.68	54.05	62.63	34.36	55.47	107.06	68.3	80.34	92.4	67.39	36.1	64.5	63.77	47.52	54.16	31.06	55.85	39.35	64.11	68.4	70.77	79.83	86.2	53.14	73.95	67.79	60.03	82.99	67.89	71.94	115.62	84.84	105.37	52.37	88.72	184.97	107.54	128.41	153.74	113.49	55.22	101.22	99.99	71.64	92.3	46.83
16939	16939	Lor	0.42	0.12	0.07	0.14	0.26	0.29	0.32	0.41	0.45	0.19	0.24	0.05	0.1	0.21	0.43	0.03	0.12	0.1	0.16	0.94	0.26	0.21	0.25	0.12	0.12	0.49	0.32	0.12	0.05	0.19	0.65	0.21	0.12	0.24	0.39	0.46	0.56	0.65	0.72	0.32	0.4	0.08	0.16	0.33	0.64	0.04	0.19
14375	14375	Xrcc6	16.54	14.1	15.33	13.33	15.81	15.47	12.22	14.55	14.59	14.34	13.58	14.85	14.96	15.64	13.35	17.48	16.58	14.82	13.12	14.34	13.93	15.36	19.13	12.25	15.77	13.3	15.77	14.24	13.7	14.7	25.74	23.73	24.06	22.42	24.1	24.74	21.11	22.91	23.31	23.87	22.87	22.72	23.47	24.52	20.12	29.79	25
68073	68073	Atpsckmt	11.68	11.67	11.25	11.43	11.34	9.37	12.98	11.74	15.54	11.16	11.34	10.81	11.09	11.82	12.54	15.15	12	10.2	11.48	14.77	13.01	16.95	9.56	9.1	8.61	10.47	8.73	10.33	10.61	10.56	18.18	19.65	17.67	19.22	17.29	14.99	22.42	18.48	24.83	18.58	19.1	16.53	17.41	18.54	18.9	25.82	18.1
67442	67442	Retsat	11.57	8.65	11.44	9.15	10.91	11.79	8.11	10.69	10.53	10.74	12.47	13.38	8.01	9.83	35.73	6.23	9.9	9.25	7.67	4.84	8.4	7	10.93	8.36	12.53	7.47	11.24	12.37	10.18	8.4	18.01	14.56	17.96	15.39	16.63	18.86	14	16.83	16.83	17.87	21	20.47	12.58	15.41	53.86	10.62	14.93
18081	18081	Ninj1	52.6	54.86	53.1	59.18	45.29	50.97	48.36	49.52	44.18	87.43	95.17	68.09	86.34	53.3	90.35	54.51	61.94	87.24	65.26	71.67	90.9	60.23	63.95	102.71	76.58	64.67	77.57	104.27	63.42	82.19	81.86	92.35	83.35	99.56	69.02	81.52	83.56	77.97	70.62	145.48	160.27	104.14	135.49	83.57	136.22	92.9	93.37
21414	21414	Tcf7	9.58	1.72	1.48	1.61	3.39	5.73	4.29	5.3	3.91	2.21	2.1	2.75	4.43	5.76	3.74	3.09	3.45	2.98	5.21	10.71	4.15	4.13	4.38	4.45	5.86	7.09	4.48	2.14	2.22	3.85	14.91	2.89	2.33	2.7	5.17	9.17	7.41	8.35	6.25	3.68	3.53	4.21	6.95	9.04	5.64	5.26	5.2
93714	93714	Pcdhga6	2.05	2.02	1.38	2.25	1.89	2.03	2.83	1.28	1.93	1.39	2.51	1.41	1.73	1.35	1	1.58	1.73	1.23	1.29	2.8	2.01	1.6	1.84	2.55	1.79	2.06	2.02	2.07	1.78	1.54	3.19	3.4	2.17	3.79	2.88	3.24	4.9	2.02	3.09	2.31	4.22	2.15	2.72	2.12	1.51	2.7	2.6
77254	77254	Yif1b	32.81	31.97	32.73	37.5	30.22	32.81	33.73	31.52	29.12	41.63	40.14	28.46	32.69	32.04	31.21	36.04	32.32	34.2	25.23	28.83	30.73	33.05	33.06	32.6	33.86	28.37	33.67	44.8	31.97	32.26	51.06	53.82	51.37	63.08	46.05	52.49	58.28	49.63	46.54	69.27	67.6	43.54	51.29	50.23	47.06	61.42	48.72
16534	16534	Kcnn4	12.22	14.39	14.46	13.99	13.25	10.62	7.65	9.44	5.55	17.62	41.06	19.11	24.54	15.28	9.68	7.68	15.64	22.19	21.82	28.34	25.53	14.5	21.02	22.57	17.09	26.13	17.95	17.23	15.35	23.4	19.01	24.22	22.7	23.53	20.2	16.99	13.21	14.86	8.87	29.32	69.15	29.22	38.52	23.97	14.59	13.09	23.58
667055	667055	Unc93a2	0.62	10.99	0.49	3.27	0.22	0.41	0.06	0.26	0.12	1.01	0.82	0.09	0.14	0.08	0.93	0.12	0.03	0.07	0.26	0.45	0.22	0.03	0.15	0.6	0.34	1.37	0.17	3.03	3.5	2.44	0.96	18.5	0.77	5.49	0.33	0.66	0.1	0.41	0.19	1.67	1.39	0.13	0.22	0.13	1.41	0.2	0.04
110935	110935	Atp6v1b1	0	0.02	0	0	0	0	0.03	0	0	0	0	0	0	0	0	0	0.02	0	0	0	0	0	0	0.02	0	0	0	0	0.02	0	0	0.04	0	0	0	0	0.04	0	0	0	0	0	0	0	0	0	0.03
260299	260299	Cadm4	25.06	27.64	7.78	4.97	11.97	19.82	20.69	23.75	20.41	25.18	11.93	7.03	8.72	13.9	12.62	2.95	11.57	15.57	13.11	50.84	16.49	8.19	10.29	15.75	12.79	24.86	7.25	11.32	7.79	14.83	39	46.54	12.22	8.36	18.25	31.71	35.74	37.39	32.62	41.9	20.1	10.75	13.69	21.79	19.03	5.03	17.44
319186	319186	H2bc14	0	0	0	0	0.35	0	0.2	0.16	0	0.17	0	0.34	0	0	0	0	0.17	0.16	0	0	0	0.18	0	0	0	0.17	0	0	0	0	0	0	0	0	0.53	0	0.34	0.26	0	0.28	0	0.52	0	0	0	0	0.25
100034363	100034363	Tmsb15b2	0.47	0.41	0	0	0.38	0.11	0.59	0.27	0.48	0.12	0.14	0	0.23	0	0.51	0	0.39	0.64	0	0.24	0	0.13	0	0.11	0.32	0.6	0.21	0	0	0.15	0.73	0.69	0	0	0.58	0.17	1.02	0.42	0.76	0.19	0.24	0	0.36	0	0.77	0	0.58
56457	56457	Clptm1	40.73	38.78	35.46	35.22	36.02	37.89	35.82	37.22	34.78	39.03	43.26	33.41	36.31	34.99	38.27	40.29	32.62	35.79	33.06	52.46	35.93	38	38.33	40.4	37.81	47.44	37.96	42.16	35.36	42.96	63.38	65.28	55.66	59.24	54.9	60.61	61.89	58.6	55.58	64.94	72.85	51.1	56.97	54.87	57.69	68.66	49.17
69540	69540	Klk10	0.89	0.07	0.14	0.27	0.18	0.07	0.08	0.1	0.04	0	0.03	0.07	0	0.18	0	0.11	0.07	0.1	0.07	0.07	0.04	0.22	0.28	0.21	0.1	0.24	0.2	0.9	0.2	0.13	1.38	0.12	0.22	0.45	0.27	0.11	0.14	0.16	0.06	0	0.06	0.11	0	0.28	0	0.18	0.1
16782	16782	Lamc2	17.77	5.87	2.49	4.56	18.76	11.84	7.91	12.94	4.86	3.11	3.16	1.33	4.43	9.06	6.38	1.66	3.65	5.98	5.12	67.7	10.85	5.2	13.68	9.06	8.2	59.32	5.06	5.97	8.53	10.06	27.65	9.87	3.91	7.67	28.6	18.94	13.67	20.38	7.76	5.18	5.33	2.04	6.95	14.21	9.62	2.83	5.51
73463	73463	C2cd6	0	0	0	0	0	0	0.03	0	0.01	0.06	0	0	0.03	0	0	0	0	0	0	0	0	0	0.03	0	0	0	0	0.01	0	0	0	0	0	0	0	0	0.06	0	0.01	0.1	0	0	0.05	0	0	0	0
14563	14563	Gdf5	1.58	0.13	0.31	0.16	1.06	0.3	0.97	0.77	0.72	0.3	0.19	0.51	1.3	1.38	0.76	1.45	0.57	2.87	0.37	0.32	0.87	0.97	1.8	0.24	1.31	0.52	0.59	0.78	0.65	0.28	2.46	0.22	0.49	0.27	1.62	0.48	1.68	1.21	1.15	0.5	0.33	0.79	2.04	2.16	1.14	2.48	0.86
100017	100017	Ldlrap1	10.75	13.3	11.14	13.67	9.99	9.78	12.66	13.4	9.68	15.52	19.51	11.6	14.15	13.13	12.34	13.93	11.51	15.37	13.53	22.31	16.24	15.75	15.12	18.52	13.43	16.27	15.27	14.64	12.33	16.74	16.73	22.39	17.48	23	15.23	15.64	21.87	21.09	15.47	25.82	32.85	17.75	22.2	20.59	18.61	23.73	17.36
240888	240888	Gpr161	3.12	4.27	1.67	2.37	1.89	2.4	3.57	3.55	2.77	2	1.94	1.7	2.8	3.19	1.56	1.68	1.75	1.93	2.55	5.47	3.11	2.86	2.39	3.17	3.15	3.76	2.86	2.11	2.96	2.36	4.86	7.18	2.62	3.99	2.88	3.84	6.16	5.59	4.42	3.32	3.27	2.61	4.4	5.01	2.35	2.86	2.64
237823	237823	Pfas	5.58	4.71	4.9	4.71	5.48	4.76	6.23	4.81	5.12	3.8	5.74	5.05	5.75	6.15	4.05	6.79	4.88	3.71	5.89	6.48	5.68	6.5	7.03	5.12	5.8	4.93	6.21	3.46	4.02	5.39	8.68	7.92	7.69	7.92	8.35	7.62	10.76	7.57	8.18	6.33	9.67	7.72	9.03	9.65	6.1	11.58	7.35
98752	98752	Fcrla	1.1	0.05	0.31	0.3	0.36	0.64	0.23	0.16	0.19	0.57	0.42	0.58	0.49	0.21	0.4	0.23	0.85	0.53	0.68	0.41	0.24	0.31	0.37	0.37	0.66	0.25	0.61	0.98	0.26	0.94	1.71	0.09	0.49	0.5	0.55	1.03	0.4	0.25	0.3	0.95	0.7	0.89	0.78	0.32	0.6	0.39	1.28
233065	233065	Alkbh6	18.88	13.11	16.42	13.85	19.6	16.58	18.79	16.22	19.82	14.78	14.95	14.21	15.04	17.88	12.61	19.77	16.6	15.4	15.56	18.24	16.6	18.64	18.23	13.92	16.63	19.86	16.5	17.13	14.97	15.44	29.38	22.07	25.77	23.3	29.87	26.53	32.46	25.53	31.68	24.6	25.18	21.73	23.61	28.03	19.01	33.69	25.03
14133	14133	Fcna	3.82	4.26	6.99	8.17	2.07	6.26	4.82	2.13	6.17	19.07	5.69	3.36	2.83	1.3	13.35	1.33	2.86	3.14	1.62	2.73	8.27	1.73	2.54	5.86	5.45	3.68	6.89	16.72	3.94	3.88	5.95	7.16	10.98	13.74	3.16	10.01	8.33	3.35	9.87	31.73	9.59	5.14	4.44	2.04	20.12	2.26	4.32
320237	320237	Smim10l2a	0.22	0.35	0.04	0.15	0.18	0.14	0.39	0.05	0.34	0.2	0.13	0.04	0.11	0.15	0.12	0.15	0.16	0.24	0.13	0.16	0.14	0.14	0.21	0.18	0.13	0.1	0.15	0.19	0.14	0.1	0.34	0.6	0.06	0.25	0.27	0.22	0.67	0.08	0.54	0.34	0.21	0.06	0.17	0.24	0.18	0.25	0.24
70495	70495	Atp6ap2	30.96	32.28	27.5	30.64	26.8	26.36	37.39	28.48	32.95	33.62	53.49	39.93	47.17	42.04	33.27	30.29	40.21	52.31	45.55	54.86	52.13	36.55	40.49	48.75	37.79	39.13	40.67	38.64	36.35	44.51	48.19	54.34	43.16	51.54	40.84	42.16	64.6	44.84	52.67	55.95	90.08	61.07	74.02	65.93	50.16	51.62	60.62
74400	74400	Zfp819	0.46	0.04	0.02	0.02	0	0.09	0	0	0	0.02	0	0.02	0	0.04	0.02	0	0	0	0.02	0.04	0	0	0.04	0.04	0.1	0.1	0.04	0.06	0.02	0	0.71	0.06	0.03	0.03	0	0.15	0	0	0	0.03	0	0.03	0	0.06	0.03	0	0
66977	66977	Nuf2	4.16	4.72	5.07	6.88	3.33	3.87	5.7	5.74	4.54	6.79	10.55	3.54	8.1	6.81	3.96	4.14	3.46	5.61	4.55	7.62	7.81	6.14	10.93	5.97	4.01	6.1	5.94	5.78	5.95	6.27	6.47	7.94	7.96	11.58	5.07	6.2	9.85	9.04	7.26	11.3	17.77	5.42	12.71	10.68	5.97	7.06	5.22
192662	192662	Arhgdia	217.41	268.1	211.19	239.54	172.39	192.9	236.84	199.48	198.05	286.83	330.98	172.23	231.88	198.86	162.46	199.08	172.65	240.6	188.54	297.51	236.9	234.62	239.02	291.22	217.15	256.22	236.61	278.56	249.82	273.54	338.35	451.36	331.5	402.97	262.75	308.54	409.21	314.09	316.55	477.28	557.4	263.43	363.87	311.82	244.92	339.26	260.28
625360	625360	BC147527	1.05	0.33	2.29	2.01	0.84	1.02	0.74	0.45	0.59	1.7	2.08	0.87	0.86	0.55	0.89	0.5	1.19	1.07	1.16	1.07	1.07	1.41	0.37	0.68	0.73	1.1	1.12	1.56	0.93	0.95	1.63	0.55	3.59	3.38	1.28	1.63	1.27	0.7	0.94	2.83	3.5	1.33	1.35	0.85	1.35	0.85	1.8
19771	19771	Rlbp1	0	0	0.02	0.06	0	0	0.13	0.04	0.39	0	0	0	0.02	0	0.02	0.02	0	0.04	0	0	0.02	0.01	0	0	0.02	0	0	0	0.02	0	0	0	0.03	0.1	0	0	0.22	0.07	0.62	0	0	0	0.03	0	0.03	0.04	0
353282	353282	Sfmbt2	0.19	0.08	0.16	0.11	0.07	0.23	0.35	0.27	0.2	0.15	0.19	0.19	0.33	0.17	0.16	0.17	0.09	0.22	0.29	0.36	0.24	0.14	0.27	0.21	0.31	0.23	0.32	0.12	0.19	0.21	0.29	0.13	0.25	0.18	0.11	0.37	0.61	0.43	0.31	0.25	0.32	0.29	0.51	0.27	0.24	0.3	0.13
319636	319636	Fsd1l	2.45	2.33	3.9	3.43	3.57	2.34	2.41	2.21	2.29	3	1.52	3.13	2.24	2.68	1.58	5.72	4.72	2.4	2.72	0.84	2.41	5.18	2.3	2.09	3.13	1.04	3.4	2.33	2.45	2.42	3.81	3.92	6.12	5.77	5.44	3.74	4.17	3.48	3.66	4.98	2.57	4.79	3.51	4.2	2.38	9.75	7.11
73382	73382	Prss52	0.05	0	0	0.1	0.05	0	0	0	0.11	0	0	0	0	0	0.05	0	0	0	0	0	0	0.1	0.05	0	0	0	0	0	0	0	0.08	0	0	0.16	0.08	0	0	0	0.18	0	0	0	0	0	0.08	0	0
83456	83456	Mov10l1	0	0	0.03	0.01	0.01	0.01	0.01	0	0.01	0.02	0.01	0	0	0	0.01	0.06	0.01	0	0	0	0.01	0.05	0	0	0.01	0.01	0.01	0.01	0.01	0.02	0	0	0.05	0.02	0.02	0.02	0.02	0	0.02	0.03	0.02	0	0	0	0.02	0.1	0.02
27052	27052	Aoah	2.04	1.04	2.38	3.68	1.64	2.16	2.3	1.31	1.71	4.09	3.23	1.55	1.83	0.95	1.67	3.04	1.99	3.12	1.87	2.41	2.3	2.55	1.74	4.46	3.43	2.09	3.14	3.05	1.82	2.52	3.17	1.75	3.73	6.19	2.51	3.45	3.97	2.07	2.73	6.8	5.44	2.37	2.87	1.49	2.52	5.19	3
17427	17427	Mns1	1.67	1.76	2.18	1.92	1.64	1.61	1.58	1.81	1.43	1.86	2.95	0.83	2.49	1.99	1.4	1.69	1.25	1.79	1.81	1.95	2.16	2.05	4.04	2.07	1.42	1.81	2.06	1.85	1.83	2.17	2.59	2.96	3.41	3.23	2.51	2.57	2.73	2.86	2.28	3.09	4.97	1.28	3.91	3.11	2.11	2.87	1.89
240174	240174	Thada	1.78	1.61	1.9	1.59	1.51	1.65	1.88	1.33	1.68	1.65	1.8	1.04	1.31	1.67	1.18	1.83	1.26	1.19	1.11	1.8	1.19	2.04	2.25	2.08	1.94	2.12	2.22	1.53	1.54	2.13	2.78	2.7	2.98	2.68	2.3	2.64	3.25	2.09	2.68	2.74	3.03	1.59	2.06	2.61	1.78	3.12	1.9
378702	378702	Serf2	107.29	121.6	127.11	122.6	125.69	118.49	104.89	109.67	118.66	126.3	117.5	115.93	105.03	104.11	87.66	117.5	127.17	117.32	115.96	109.87	113.37	121.31	101.99	99.75	108.25	106.01	105.86	139.99	115.34	110.91	166.97	204.72	199.52	206.25	191.56	189.52	181.22	172.68	189.66	210.16	197.88	177.32	164.82	163.26	132.15	200.24	191.72
56698	56698	Phax	24.86	20.79	18.4	18.52	21.27	19.27	23.89	19.67	23.47	20.35	20.31	18.6	21.1	22.3	17.89	20.79	20.52	21.84	21.52	26.37	23.83	23.6	20.78	20.21	18.9	22.45	17.78	20.12	18.04	18.82	38.69	35.01	28.88	31.15	32.41	30.82	41.27	30.97	37.51	33.86	34.2	28.46	33.11	34.96	26.98	35.43	30.94
81910	81910	Rrbp1	118.4	129.7	126.66	165.06	92.58	116.43	136.28	103.77	95.92	175.38	193.64	70.36	116.04	99.65	135.85	105.87	86.95	108.43	89.98	173.16	139.16	122.02	133.03	159.95	112.65	177.59	131.82	147.57	132.07	156.8	184.26	218.36	198.81	277.67	141.1	186.22	235.46	163.39	153.32	291.82	326.1	107.62	182.09	156.25	204.81	180.42	131.08
227545	227545	Proser2	3.46	0.34	0.46	0.58	2.9	2.84	5.31	1.94	3.89	0.44	0.19	0.65	1.71	2.81	3.38	0.31	1.41	1.62	2.18	6.12	1.35	1.9	2.72	1.57	1.94	7.72	1.16	0.52	1.16	1.64	5.38	0.57	0.72	0.97	4.41	4.55	9.18	3.05	6.21	0.73	0.32	0.99	2.69	4.41	5.09	0.53	2.12
97884	97884	B3galnt2	30.96	22.53	23.37	20.6	27.17	26.23	21.95	24.97	26.31	15.67	15.46	29.24	23.14	27.22	19.3	23.91	24.03	21.25	26.51	13.9	19.79	18.88	25.25	17.75	24.21	14.86	21.5	15.38	25.3	18.14	48.19	37.93	36.69	34.65	41.41	41.96	37.92	39.32	42.05	26.08	26.03	44.72	36.31	42.69	29.09	40.74	36.23
672498	672498	Gm9564	0	0	0	0	0	0	0	0	0	0	0.11	0	0	0	0	0	0	0	0	0.06	0	0	0	0	0	0	0	0	0	0	0	0	0	0	0	0	0	0	0	0	0.19	0	0	0	0	0	0
637578	637578	Gm20765	0	0	0	0	0	0	0	0	0	0	0	0	0	0	0	0.01	0	0	0	0.01	0	0	0	0	0	0	0	0	0	0	0	0	0	0	0	0	0	0	0	0	0	0	0	0	0	0.02	0
18633	18633	Pex16	18.49	14.78	16.01	13.49	15.97	14.57	13.8	15.17	16.03	14.66	16.64	17.66	16.37	18.78	31.46	17.49	15.56	16.11	16.72	13.25	16.24	17.21	15.5	14.44	13.96	12.87	13.78	18.21	12.76	13.43	28.78	24.89	25.13	22.69	24.33	23.3	23.84	23.89	25.62	24.4	28.03	27.01	25.69	29.46	47.43	29.8	23.45
18188	18188	Nrtn	17.75	5.51	3.44	2.37	14.16	15.02	34.7	11.31	34.99	3.64	2.71	8.26	11.32	14	9.82	2.89	5.02	13	6.81	14.44	11.02	8.59	11.86	8.47	7.9	23.48	4.1	5.22	14.19	9.56	27.63	9.28	5.4	3.98	21.58	24.02	59.96	17.81	55.92	6.05	4.56	12.64	17.77	21.95	14.81	4.92	7.57
15205	15205	Hes1	21.99	15.64	14.47	12.1	23.43	23.53	19.13	21.66	22.28	17.09	14.74	14.3	16.07	19.71	17.47	17.29	17.14	17.21	20.12	33.94	21.26	27.57	19.99	15.01	14.97	29.22	13.48	18.95	18.45	17.11	34.22	26.32	22.72	20.35	35.72	37.63	33.06	34.1	35.61	28.43	24.82	21.88	25.21	30.9	26.33	29.47	25.84
665700	665700	Hmcn2	9.63	3.2	5.75	7.24	6.9	11.05	42.65	6.81	48.86	5	3.74	4.03	11.12	11.64	6.74	6.76	4.47	8.74	3.82	2.65	3.63	4.28	20.31	12.07	18.42	8.22	11.79	9.77	11.33	6.86	14.98	5.39	9.03	12.18	10.51	17.67	73.68	10.72	78.09	8.32	6.3	6.16	17.45	18.25	10.17	11.53	6.73
69572	69572	Mfsd3	4.31	3.48	3.92	3.85	4.12	3.9	3.6	3.83	4.52	4.36	4.22	4.76	4.73	4.22	4.76	3.79	5.04	3.86	4.29	3.47	4.56	3.32	3.25	3.02	4.56	3.1	3.28	5.44	4.21	3	6.71	5.86	6.16	6.48	6.28	6.24	6.23	6.03	7.22	7.25	7.11	7.28	7.42	6.62	7.17	6.45	7.59
14130	14130	Fcgr2b	34.14	28.97	50.1	57.83	25.39	35.09	41.94	26.72	27.21	67.74	76.26	46.53	48.16	26.84	36.07	46.69	44.15	75.16	46.36	54.64	63.72	41.32	39.23	93.26	61.67	52.2	57.01	71.48	43.71	63.28	53.13	48.76	78.63	97.28	38.7	56.13	72.47	42.06	43.49	112.72	128.43	71.17	75.58	42.08	54.39	79.56	66.56
380732	380732	Milr1	2.97	3.43	6.06	6.35	2.39	2.72	2.94	2.61	2.44	6.8	7.84	4	5.06	4.19	3.56	3.11	4.55	5.58	4.72	5.13	5.38	3.4	3.62	6.36	4.48	3.77	5.28	6.27	3.95	5.62	4.63	5.78	9.51	10.68	3.64	4.35	5.07	4.12	3.91	11.32	13.2	6.13	7.94	6.56	5.37	5.3	6.85
22608	22608	Ybx1	458.44	537.73	423.22	368.47	443.69	418.08	402.28	455.96	416.06	359.29	445.87	472.68	470.23	480.12	366.23	360.24	452.32	470.9	517.45	517.9	499.63	423.07	429.07	372.34	375.41	411.93	365.94	395.19	402.85	443.85	713.46	905.28	664.31	619.87	676.24	668.72	695.06	717.94	665.01	597.85	750.88	722.97	737.89	752.85	552.11	613.9	681.89
108167466	108167466	Gm45618	0	0	0	0	0	0	0	0	0	0.04	0	0	0	0	0	0	0	0	0	0	0	0	0	0	0	0	0	0	0	0	0	0	0	0	0	0	0	0	0	0.06	0	0	0	0	0	0	0
66086	66086	Fopnl	35.56	26.31	31.34	29.07	37.28	34.54	28.52	36.93	35.22	26.11	25.95	38.62	36	36.16	26.23	32.01	44.12	34.88	38.09	30.21	33.56	35.53	32.45	22.92	30.69	24.4	27.05	34.87	29.65	26.97	55.34	44.29	49.2	48.9	56.81	55.24	49.27	58.14	56.3	43.44	43.7	59.08	56.5	56.7	39.55	54.55	66.52
52670	52670	Cpsf4l	0.51	0.09	0	0	0.16	0.26	0.2	0.17	0.1	0.04	0.03	0.08	0	0.08	1.26	0	0	0.17	0.04	0.54	0.26	0.21	0.08	0.04	0.09	0.37	0.08	0	0	0.08	0.79	0.15	0	0	0.25	0.42	0.35	0.27	0.16	0.07	0.06	0.12	0	0.13	1.89	0	0
14772	14772	Grk4	3.05	3.54	3.32	3.21	3.43	3.27	4.91	3.08	3.62	2.59	2.74	3.4	2.9	3.05	3.46	3.16	2.74	2.43	2.94	3.42	3.17	2.94	3.2	3.94	4.79	3.84	4.8	2.18	2.77	3.58	4.75	5.95	5.22	5.41	5.22	5.23	8.48	4.85	5.79	4.31	4.61	5.21	4.56	4.78	5.21	5.38	4.13
239852	239852	Zpld1	0.02	0.02	0	0	0	0	0	0.03	0.05	0.02	0	0.03	0	0.03	0.03	0.05	0	0.02	0.02	0	0.02	0.05	0	0.03	0.02	0.05	0	0.02	0.01	0.02	0.03	0.04	0	0	0	0	0	0.05	0.08	0.03	0	0.05	0	0.05	0.05	0.09	0
11517	11517	Adcyap1r1	1.23	2.54	2.97	3.72	0.74	2.11	11.05	1.68	9.53	7.88	2.1	0.61	0.82	0.58	1.57	1.16	0.86	2.37	0.66	0.49	1.64	1.08	1.23	2.87	1.66	1.74	1.61	1.48	3.63	1.12	1.92	4.27	4.67	6.25	1.12	3.37	19.1	2.64	15.24	13.11	3.53	0.94	1.29	0.91	2.37	1.98	1.3
14735	14735	Gpc4	16.85	19.63	20.95	21.96	26.35	22.26	29.99	24.52	24.82	20.77	20	20.55	17.75	18.66	23.35	27.35	22.11	19.32	17.47	19.61	20.42	22.05	19.52	17.42	18.25	20.49	19.85	16.88	22.08	16.69	26.23	33.04	32.88	36.94	40.17	35.6	51.82	38.61	39.67	34.56	33.68	31.44	27.86	29.25	35.21	46.61	33.33
53885	53885	Nphp1	13.52	12.89	11.8	12.14	12.69	13.63	13.15	12.86	15.16	11.44	9.01	12.74	11.92	13.41	9.94	17.4	13.54	10.89	13.41	11.63	12.57	16.12	13.45	9.72	12.73	11.12	11.45	11.22	11.48	12.32	21.04	21.7	18.53	20.43	19.33	21.79	22.72	20.25	24.23	19.04	15.18	19.48	18.71	21.03	14.99	29.66	20.42
67332	67332	Snrpd3	110.79	82.35	89.41	67.84	84.31	89.6	95.57	85.54	96.56	86.02	98.88	90.49	103.43	103.99	88.17	76.9	95.14	93.97	89.41	111.4	88	110.49	116.57	73.35	75.11	84.22	85.55	94.22	88.65	84.62	172.42	138.64	140.34	114.12	128.49	143.32	165.12	134.68	154.34	143.13	166.53	138.4	162.31	163.06	132.92	131.05	143.43
213068	213068	Tmem71	0.9	0.95	1.17	1.07	0.85	0.92	1.13	0.98	0.92	1.35	1.31	1.41	1.44	0.84	1.16	1.57	1.24	1.41	1.47	0.92	1.61	1.37	1.29	1.9	1.44	1.03	1.73	1.55	1.28	1.3	1.39	1.59	1.84	1.8	1.3	1.47	1.95	1.55	1.48	2.24	2.21	2.16	2.26	1.32	1.75	2.68	1.87
434264	434264	Sult2a5	0	0	0	0	0	0	0	0	0	0	0	0	0	0	1.37	0	0	0	0	0	0	0	0	0	0	0	0	0	0	0	0	0	0	0	0	0	0	0	0	0	0	0	0	0	2.06	0	0
329015	329015	Atg2a	11.32	9.91	9.38	9.37	9.93	9.95	12.2	9.61	11.88	9.93	9.55	9.65	11.68	10.29	11.68	12.11	8.02	8.85	10.26	13.46	11.13	12.72	10.17	12.27	12.03	13.23	10.34	9.82	9.65	11.01	17.61	16.69	14.72	15.76	15.14	15.92	21.08	15.13	18.99	16.52	16.08	14.76	18.32	16.14	17.6	20.63	12.09
18198	18198	Musk	1.18	2.27	2.93	2.23	2.48	1.41	1.32	1.23	1.08	2.1	1.22	2.3	1.5	1.35	0.78	8.57	2.52	1.53	1.67	0.09	1.22	3.68	1.62	1.34	1.87	0.44	2.05	1.69	1.33	2.34	1.84	3.83	4.59	3.75	3.79	2.25	2.29	1.93	1.73	3.5	2.05	3.52	2.35	2.11	1.18	14.61	3.8
75425	75425	Tti1	6.12	5.76	5.61	5.82	6.55	6.53	6.46	5.97	6.44	6.13	6.09	5.58	5.74	6.05	5.18	7.79	5.78	5.04	5.4	5.89	5.72	6.31	7.64	6.42	7.13	6.09	7.64	5.85	6.27	6.54	9.53	9.7	8.8	9.79	9.98	10.45	11.16	9.39	10.29	10.21	10.26	8.54	9.01	9.48	7.81	13.28	8.71
74316	74316	Isca2	32.61	34.56	36.53	34.28	38.03	35.16	34.83	34.45	40.5	32.89	32.32	44.82	36.43	38.62	36.27	37.89	41.29	34.5	40.95	27.17	37.79	38.47	34.29	25.56	33.12	26.28	32.71	42.53	35.81	28.21	50.75	58.19	57.34	57.67	57.96	56.24	60.18	54.24	64.74	54.73	54.44	68.55	57.16	60.56	54.68	64.58	62.25
66469	66469	Prxl2b	137.17	89.05	147.29	103.79	145.74	127.94	47.42	119.05	100.82	92.32	73.95	151.08	102.74	122.62	94.5	133.66	140.89	121.94	150.27	23.94	104.01	83.55	78.92	61.51	109.41	27.24	88.66	97.56	113.83	67.22	213.48	149.92	231.2	174.6	222.13	204.65	81.93	187.45	161.14	153.62	124.54	231.08	161.22	192.28	142.46	227.78	212.39
100503609	100503609	Lnp1	0.14	0.07	0	0	0.07	0	0	0	0	0.07	0	0.07	0	0	0	0.22	0.14	0	0	0	0	0	0	0	0	0	0.07	0	0.07	0	0.22	0.12	0	0	0.11	0	0	0	0	0.11	0	0.11	0	0	0	0.37	0.21
22190	22190	Ubc	791.93	579.49	530.16	509.85	573.4	613.69	534.06	548.5	637.4	601.78	551.02	586.95	526.49	490.06	539.26	528.15	495.61	594	471.35	588.51	503.32	500.27	628.62	506.52	548.53	576.16	462.74	610.7	538.5	568.99	1232.46	975.57	832.18	857.7	873.93	981.6	922.73	863.64	1018.78	1001.33	927.96	897.76	826.18	768.44	812.98	900.04	747.17
241520	241520	Fam171b	2.03	1.98	2.45	4.68	2.42	3.05	6.07	3.19	4.3	3.51	2.91	2.19	2.77	2.73	2.23	3.85	2.61	2.86	2.22	3.44	3.04	3.05	2.98	3.01	3.63	2.93	3.41	2.3	2.82	2.18	3.16	3.34	3.84	7.88	3.69	4.87	10.49	5.03	6.87	5.84	4.91	3.35	4.34	4.28	3.36	6.56	3.94
12461	12461	Cct2	134.35	121.16	104.6	102.84	114.56	106.83	119.85	126.2	112.17	109.99	133.83	104.76	121.81	133.99	97.36	138.5	107.86	109.7	108.47	167.24	127.71	147.36	147.27	109.63	108.23	137.19	108.43	119.08	103.78	120.59	209.09	203.97	164.18	173.01	174.61	170.88	207.07	198.71	179.29	183.02	225.39	160.23	191.14	210.11	146.78	236.02	162.61
14680	14680	Gnal	1.18	0.46	0.24	0.3	0.48	0.34	1.31	0.39	0.65	0.41	0.38	0.38	0.74	0.65	0.42	0.4	0.3	0.47	0.51	0.73	0.57	0.35	0.49	0.61	1.89	0.75	0.48	0.47	0.57	0.37	1.84	0.77	0.38	0.5	0.73	0.55	2.26	0.61	1.04	0.68	0.64	0.58	1.17	1.01	0.63	0.67	0.45
224671	224671	Btbd9	4.88	4	3.45	4.17	4.28	4.56	4.55	4.33	4.52	4.62	4.95	3.27	3.59	3.55	3.39	5.16	3.59	4.06	3.45	5.99	3.98	4.77	4.49	5.21	4.58	6.25	4.61	3.87	3.64	4.61	7.6	6.74	5.41	7.02	6.52	7.3	7.86	6.82	7.22	7.69	8.34	5.01	5.63	5.57	5.11	8.8	5.41
16889	16889	Lipa	26.65	36.55	27.74	32.36	24.28	25.58	29.4	26.48	17.31	38.8	55.63	53.58	69.8	43.77	58.93	31.3	43.89	71.54	59.12	54.22	73.79	33.36	57.4	85.44	62.36	49.33	78.83	55.67	49.35	74.68	41.48	61.54	43.55	54.45	37.01	40.91	50.8	41.69	27.67	64.56	93.69	81.96	109.54	68.64	88.84	53.34	66.17
72137	72137	Wdsub1	11.86	8.75	9.72	9.41	11.48	11.18	15.35	11.71	13.58	10.42	7.84	9.5	11.63	12.61	9.12	12.69	10.43	10.24	11.05	12.11	12.13	13.7	10.89	10.75	11.16	11.66	9.51	9.99	10.84	10.29	18.46	14.74	15.25	15.84	17.5	17.88	26.52	18.44	21.71	17.35	13.2	14.53	18.25	19.78	13.75	21.62	15.72
67268	67268	Myl12a	193.17	316.49	249.36	306.18	241.49	225.34	184.22	255.71	165.32	284.05	237.57	242.57	196.93	218.31	148.16	522.11	246.56	221.14	188.12	219.15	196.6	272.8	218.83	234.99	234.73	222.69	234.86	315.01	231.89	279.84	300.63	532.81	391.41	515.08	368.06	360.44	318.29	402.63	264.23	472.65	400.08	371.01	309.03	342.32	223.37	889.76	371.71
17183	17183	Matn4	1.51	2.34	0.82	1.05	1.03	1.89	4.92	1.69	2.37	3.34	1.45	0.89	0.53	1.51	0.88	5.03	1.13	0.8	0.9	1.92	1.41	6.89	1.27	2.14	1.29	1.16	0.84	1.74	0.89	1.05	2.35	3.93	1.29	1.77	1.56	3.03	8.5	2.67	3.78	5.56	2.45	1.36	0.83	2.37	1.32	8.57	1.71
14344	14344	Fut2	13.04	0.01	0.06	0.01	17.08	7.06	1.41	6.08	1.64	0.07	0.04	0.16	2.32	5.65	2.45	0.09	1.64	0.99	1.84	35.65	3.97	3.97	7.84	4.01	3.27	39.48	1.97	0.3	0.68	5.71	20.29	0.02	0.09	0.02	26.04	11.29	2.44	9.57	2.62	0.11	0.07	0.24	3.64	8.86	3.69	0.15	2.47
12364	12364	Casp12	19.59	19.53	10.03	10.75	11.9	14.14	28.04	15.38	20.12	12.66	13.79	13.12	15.9	17.74	11.75	7.85	10.45	14.37	14.96	22.92	16.42	13.48	14.16	16.31	16	18.86	11.77	17.46	17.6	13.51	30.48	32.89	15.74	18.09	18.13	22.61	48.44	24.21	32.16	21.06	23.22	20.06	24.96	27.82	17.71	13.38	15.76
13244	13244	Degs1	34.2	52.49	34.09	41.53	32.54	37.64	65.5	42.22	54.9	45.02	55.15	43.52	54.98	49.39	48.74	34.9	41.13	56.93	46.67	60.68	54.89	48.27	59.64	58.67	46.22	53.49	49.97	56.34	54.64	54.65	53.22	88.36	53.51	69.87	49.6	60.21	113.16	66.48	87.75	74.91	92.88	66.57	86.27	77.45	73.48	59.47	62.01
326618	326618	Tpm4	202.39	363.02	209.11	287.17	132.5	206.56	292.32	256.23	183.75	291.62	331.99	161.82	260.81	231.11	162.25	156.8	154.42	222.35	200.71	421.64	300.79	241.84	262.13	317.4	207.86	355.18	219.46	263.39	257.94	296.06	314.97	611.15	328.24	483.1	201.95	330.39	505.07	403.44	293.7	485.25	559.11	247.51	409.27	362.4	244.6	267.21	232.8
74081	74081	Cep350	3.08	4.02	3.49	3.89	2.96	3.11	3.63	3.53	3.03	3.75	4.19	3.45	3.29	3.61	2.7	5.41	3.52	3.09	3.22	3.49	3.53	4.22	3.98	4.62	4.32	3.77	4.35	2.75	3.8	4.47	4.79	6.76	5.49	6.54	4.51	4.98	6.28	5.56	4.84	6.25	7.06	5.28	5.16	5.66	4.06	9.22	5.3
22036	22036	Traip	2.24	1.66	1.77	2.35	1.35	1.96	2.07	1.93	1.44	2.16	3.24	1.24	2.48	1.95	1.43	1.73	1.45	2.19	2.28	2.87	2.64	2.04	3.22	1.73	1.38	1.81	2.14	2.61	1.92	2.38	3.48	2.79	2.77	3.96	2.06	3.14	3.57	3.03	2.3	3.59	5.46	1.9	3.89	3.06	2.15	2.95	2.18
105243312	105243312	Gm39270	0.1	0.05	0.11	0.05	0.05	0	0.12	0	0	0	0.05	0	0	0	0.05	0.05	0.05	0.05	0.06	0.11	0.06	0.06	0	0.11	0	0.11	0	0	0	0.05	0.16	0.09	0.17	0.09	0.08	0	0.21	0	0	0	0.09	0	0	0	0.08	0.09	0.08
70591	70591	5730455P16Rik	8.93	8.31	9.01	8.37	9.51	8.67	6.89	7.96	7.4	6.53	6.19	9.99	7.91	9.15	6.53	11.5	9.97	7.66	9.22	4.44	7.84	8.86	8.8	7.25	10.66	4.88	10.34	7.16	8.3	7.15	13.9	13.99	14.15	14.09	14.5	13.87	11.9	12.54	11.82	10.87	10.42	15.28	12.42	14.35	9.85	19.59	15.04
115488282	115488282	LOC115488282	0.42	0.37	0.2	0.32	0.22	0.25	0.36	0.48	0.29	0.12	0.15	0.26	0.37	0.61	0.21	0.3	0.23	0.18	0.27	0.58	0.45	0.44	0.56	0.45	0.44	0.35	0.36	0.14	0.17	0.26	0.65	0.63	0.31	0.54	0.34	0.4	0.63	0.76	0.46	0.2	0.26	0.39	0.59	0.95	0.32	0.51	0.35
268465	268465	Eme1	1.76	1.55	1.03	1.67	1.03	1.11	1.34	1.38	0.92	1.62	3.15	0.9	2.24	2.32	1.01	0.96	0.81	0.84	1.71	3.15	2.11	1.87	2.47	1.58	1.1	1.62	1.32	1.02	1.19	1.64	2.73	2.62	1.61	2.81	1.57	1.78	2.32	2.18	1.47	2.69	5.3	1.37	3.52	3.63	1.53	1.63	1.22
211499	211499	Tmem87a	20.61	18.7	20.42	19.21	24.41	20.54	18.22	21.96	19.8	15.45	18.59	22.75	19.88	20.54	13.85	23	22.52	17.85	22.52	22.34	21.95	23.41	21.39	18.02	19.2	21.44	19.96	15.6	17.49	17.9	32.07	31.48	32.06	32.32	37.2	32.85	31.49	34.57	31.65	25.71	31.3	34.79	31.19	32.2	20.87	39.2	33.95
320961	320961	A630026N12Rik	1.34	1.24	0.92	0.97	1.01	0.88	1.24	1.05	1.28	0.9	0.99	1.02	1.03	1.33	1.01	1.49	0.96	0.72	1.1	1.48	1.18	1.28	1.21	1.39	1.48	1.46	1.2	0.85	0.91	1.47	2.09	2.09	1.44	1.64	1.54	1.41	2.14	1.65	2.04	1.49	1.66	1.57	1.62	2.08	1.52	2.54	1.45
214764	214764	Edrf1	4.97	4.3	3.95	4.16	4.54	4.65	5.29	4.41	4.89	3.66	4.31	4.15	4.16	4.9	4.2	6.13	3.98	3.52	4.54	5.73	4.08	5.28	5.21	4.62	4.39	5.17	4.41	3.61	3.93	4.26	7.74	7.24	6.21	6.99	6.92	7.44	9.14	6.94	7.81	6.1	7.27	6.34	6.53	7.68	6.34	10.45	6
77794	77794	Adamtsl2	0.55	1.4	1.09	0.53	1.18	0.68	1.06	0.57	1.26	0.87	0.84	0.55	0.49	0.6	2.5	1.54	0.56	0.64	0.37	0.84	0.56	1.2	1.26	0.77	0.49	0.91	1.69	2.37	1.05	1.43	0.85	2.35	1.71	0.89	1.8	1.09	1.83	0.9	2.01	1.44	1.41	0.84	0.76	0.94	3.76	2.62	0.84
69156	69156	Comtd1	6.1	5.22	4.81	4.75	5.27	4.6	4.19	5.37	4.85	4.33	6.89	6.98	6.99	6.62	4.85	4.59	5.37	6.74	7.58	7.28	7.02	5.91	6.15	5.26	4.83	5.68	5.23	6.47	5.22	6.16	9.49	8.79	7.55	8	8.04	7.35	7.24	8.45	7.75	7.2	11.6	10.68	10.97	10.38	7.32	7.82	8.1
320405	320405	Cadps2	1.23	0.15	0.17	0.18	0.79	0.55	1.89	0.86	0.81	0.2	0.15	0.34	0.62	1.05	1.7	0.28	0.23	0.43	0.48	0.82	0.44	0.6	0.93	0.69	0.74	2.28	0.55	0.31	0.54	0.55	1.92	0.26	0.27	0.31	1.2	0.88	3.26	1.36	1.29	0.33	0.25	0.52	0.97	1.64	2.57	0.48	0.34
113868	113868	Acaa1a	69.98	55.74	64.22	56.99	70.47	63.36	67.25	65.11	73.12	63.46	70.59	68.35	78.49	66.64	83.54	65.63	67.19	72.66	76.14	76.84	74.25	73.6	64.18	62.57	62.39	65.54	62	68.65	59.92	58.8	108.9	93.85	100.8	95.87	107.41	101.35	116.2	102.51	116.87	105.6	118.87	104.54	123.16	104.49	125.95	111.85	101.3
117590	117590	Asb10	11.9	7.43	12.23	8.23	13.02	12.97	3	11	10.94	7.74	5.37	14.26	9.12	11.15	6.95	6.26	13.16	12.15	12.85	0.35	8.64	4.54	7.78	4.55	12.05	1.1	8.57	9.12	9.58	5.82	18.52	12.51	19.2	13.84	19.84	20.74	5.18	17.33	17.49	12.88	9.04	21.81	14.3	17.49	10.47	10.67	19.85
227157	227157	Mpp4	0.18	0.08	0.11	0.13	0.3	0.14	0.17	0.14	0.27	0.07	0.07	0.14	0.11	0.13	0.15	0.37	0.16	0.11	0.17	0.14	0.19	0.34	0.13	0.08	0.2	0.16	0.09	0.04	0.08	0.12	0.28	0.13	0.17	0.23	0.46	0.22	0.29	0.22	0.43	0.12	0.12	0.22	0.17	0.21	0.23	0.64	0.23
14528	14528	Gch1	4.12	4.65	3.79	5.57	4.54	4.44	6.66	3.04	6.26	4.16	5.42	4.16	5.63	4.65	22.46	2.56	3.22	5.25	4.42	7.68	5.5	3.83	3.79	5.42	4.04	10.27	4.52	5.56	4.95	5.52	6.41	7.83	5.94	9.37	6.92	7.1	11.5	4.78	10	6.92	9.13	6.37	8.83	7.29	33.86	4.37	4.86
100041734	100041734	4930522L14Rik	1.31	0.56	0.64	0.77	0.9	0.86	1.43	0.88	0.83	0.95	1.04	0.99	1.13	1.25	1.06	0.76	1.22	0.89	1.03	1.61	1.3	1.39	1.3	1.27	1.15	1.23	1.05	1.03	0.83	0.91	2.03	0.94	1.01	1.3	1.37	1.38	2.47	1.39	1.32	1.58	1.74	1.51	1.77	1.96	1.59	1.29	1.84
239096	239096	Cdh24	6.14	3.05	2.21	2.4	4.6	4.16	4.77	4.92	4	2.15	3.73	2.58	4	4.82	2.93	2.47	2.28	2.26	4.09	11.04	4.41	3.28	4.24	4.1	4.17	8.07	3.56	2.9	2.5	3.75	9.56	5.14	3.47	4.05	7.01	6.66	8.24	7.75	6.39	3.58	6.28	3.95	6.28	7.56	4.42	4.21	3.44
15078	15078	H3f3a	455.75	373.36	328.25	349.14	384.28	362.47	448.97	402.14	363.96	348.23	361.2	349.39	413.97	464.96	329.79	378.52	333.78	357.13	401.43	548.23	441.7	433.5	433.86	398.15	398.53	447.64	346.31	436.22	353.15	359.17	709.27	628.56	515.23	587.33	585.69	579.78	775.72	633.19	581.73	579.44	608.3	534.41	649.62	729.08	497.18	645.05	503.2
269275	269275	Acvr1c	0.03	0.06	0.04	0.01	0.03	0.03	0	0.04	0.08	0.03	0.04	0.02	0.01	0.01	0.03	0.03	0.01	0.03	0.01	0.03	0.05	0	0.02	0.07	0.04	0.04	0.07	0.05	0.01	0.03	0.04	0.11	0.06	0.01	0.05	0.05	0	0.06	0.12	0.06	0.07	0.04	0.01	0.02	0.05	0.06	0.02
244059	244059	Chd2	8.46	6.88	6.26	6.33	7.23	7.4	7.68	7.03	7.66	6.5	6.78	7.53	6.66	7.35	6.15	7.74	6.27	6.52	6.55	8.05	7.33	7.81	8.55	7.97	9.15	9.23	8.55	5.73	6.41	7.45	13.16	11.59	9.82	10.64	11.03	11.83	13.27	11.07	12.24	10.82	11.42	11.52	10.46	11.53	9.27	13.19	9.46
107932	107932	Chd4	54.63	55.11	45.24	47.9	49.76	49.61	52.16	52.37	47.52	54.58	54.28	44.66	56.48	51.99	38.29	72.51	48.37	47.87	49.31	70.17	54.68	65.89	63.14	63.34	62.67	65.61	61.91	44.13	48.91	57.27	85.03	92.78	71.02	80.57	75.83	79.36	90.12	82.47	75.95	90.82	91.41	68.3	88.63	81.52	57.73	123.57	72.92
14686	14686	Gnat2	0.17	0.12	0.29	0.08	0.07	0.19	0.15	0.12	0.25	0.18	0.23	0.18	0.14	0.29	0.39	0.23	0.08	0.14	0.18	0.18	0.12	0.23	0.38	0.25	0.11	0.14	0.22	0.13	0.2	0.16	0.26	0.21	0.45	0.13	0.11	0.3	0.25	0.19	0.4	0.29	0.39	0.28	0.22	0.45	0.59	0.39	0.13
69226	69226	Snx24	11.64	18.38	9.95	13.22	9.93	10.69	13.09	11.58	12.06	11.17	10.88	9.36	11.86	11.19	10.72	11.78	11.47	12.47	12.81	17.7	12.75	13.06	11.94	11.68	10.42	12.14	10.99	13.08	13.46	12.41	18.11	30.94	15.61	22.24	15.14	17.1	22.62	18.23	19.28	18.59	18.33	14.31	18.61	17.54	16.16	20.08	17.29
56279	56279	Dipk1b	8.79	3.89	2.42	2.66	3.96	6.76	10.32	7.29	8.23	2.78	4.37	4.14	6.71	6.63	4.31	3.29	3.68	4.98	5.45	9.7	6.66	5.06	5.27	4.78	6.35	5.32	5.02	4.29	4.32	4.17	13.68	6.54	3.8	4.48	6.04	10.81	17.84	11.48	13.15	4.62	7.36	6.33	10.53	10.4	6.5	5.6	5.54
545667	545667	Shisal2a	0.06	0.09	0	0.04	0.06	0	0.21	0.01	0.13	0.08	0.03	0.02	0.14	0.06	0	0.09	0.01	0.07	0.06	0.02	0.13	0.13	0.01	0.12	0.06	0.09	0.14	0	0.03	0.01	0.09	0.15	0	0.07	0.09	0	0.36	0.02	0.21	0.14	0.05	0.02	0.21	0.1	0	0.16	0.02
60365	60365	Rbm8a	30.69	28.7	28.61	26.41	27.78	26.23	31.43	28.23	32.53	27.49	29.3	27.05	31.91	32.03	24.13	27.1	30.94	31.37	32.19	40.04	32.85	36.85	34.5	26.15	24.62	27.18	24.53	31.71	25.83	26.56	47.76	48.32	44.91	44.43	42.34	41.95	54.3	44.45	51.99	45.74	49.35	41.38	50.07	50.23	36.38	46.18	46.65
117606	117606	Boc	3.94	9.81	3.72	8.48	4.17	6.81	14.39	3.65	11.1	7.22	6.23	2.42	2.58	2.94	2.86	7.9	3.37	3.87	2.76	3.78	2.73	7.01	3.86	6.41	5.95	7.56	6.5	5.22	7.59	5.21	6.12	16.52	5.85	14.27	6.36	10.89	24.86	5.75	17.74	12.02	10.5	3.7	4.06	4.61	4.31	13.46	5.08
279029	279029	Stkld1	0.02	0.04	0.07	0.11	0.14	0.08	0.07	0.02	0.15	0.08	0.13	0.18	0.16	0.02	0.02	0.08	0.08	0.09	0.14	0.21	0.14	0.07	0.14	0.21	0.13	0.09	0.06	0.18	0.02	0.06	0.03	0.07	0.11	0.18	0.22	0.12	0.12	0.03	0.25	0.13	0.23	0.28	0.26	0.04	0.03	0.14	0.12
22070	22070	Tpt1	4562.87	3542.32	3747.25	3336.91	4693.94	3911.13	3486.48	4153.78	3756.34	3554.73	3271.53	4464.37	4375.19	4554.92	3419.37	4221.76	4327.2	4020.97	4746.42	4125.06	4471.34	4337.94	3662.54	3038.25	3797.17	3636.99	3112.04	3584.14	3508.15	3234.55	7101.07	5963.52	5881.92	5613.53	7154.05	6255.87	6023.87	6540.36	6003.91	5914.94	5509.53	6828.38	6865.65	7142.37	5154.96	7194.48	6523.52
70428	70428	Polr3b	6.98	5.5	5.73	5.41	6.12	6.06	5.01	5.94	5.16	5.69	6.05	5.31	5.71	5.98	5.1	7.45	5.47	5.16	5.83	7.78	5.62	7.02	6.96	6.19	6.67	7.88	6.46	5.36	5.06	6.4	10.86	9.27	8.99	9.1	9.32	9.7	8.66	9.35	8.25	9.47	10.19	8.12	8.95	9.38	7.69	12.69	8.25
100861814	100861814	LOC100861814	0	0	0	0	0	0	0	0	0	0	0	0	0	0	0	0	0	0	0	0	0	0	0	0	0.03	0	0	0	0	0	0	0	0	0	0	0	0	0	0	0	0	0	0	0	0	0	0
242425	242425	Gabbr2	0.04	0.05	0.06	0.07	0.09	0.07	0.33	0.05	0.24	0.08	0.13	0.07	0.06	0.11	2.17	0.04	0.06	0.15	0.08	0.16	0.09	0.04	0.2	0.23	0.11	0.13	0.11	0.11	0.15	0.15	0.07	0.08	0.09	0.13	0.13	0.12	0.58	0.08	0.38	0.12	0.22	0.1	0.09	0.18	3.27	0.07	0.1
385377	385377	Pnma5	0	0	0	0	0	0	0	0.02	0.02	0	0	0	0	0	0	0	0	0.02	0	0	0	0	0	0	0	0	0	0	0	0	0	0	0	0	0	0	0	0.02	0.03	0	0	0	0	0	0	0	0
20168	20168	Rtn3	51.78	56.15	46.47	52.73	54.42	52.78	80.78	52.34	74.98	57.12	62.22	52.76	64.79	55.51	53.94	41.79	52.63	71.14	60.8	89.06	70.15	59.19	61.58	62.08	52.31	77.99	54.02	56.37	59.11	59.25	80.58	94.53	72.95	88.7	82.95	84.42	139.58	82.42	119.84	95.05	104.79	80.7	101.67	87.04	81.31	71.22	79.34
79202	79202	Tnfrsf22	3.23	6.84	4.08	6.58	3.02	2.83	4.02	4.16	3.38	3.92	3.79	3.15	4.46	4.39	2.7	6.22	2.97	2.56	3.14	4.82	4.43	7.12	4.77	4.79	3.87	4.97	4.21	5.05	4.79	5.49	5.02	11.52	6.41	11.07	4.61	4.53	6.95	6.55	5.41	6.52	6.39	4.82	7	6.88	4.08	10.59	4.48
102637099	102637099	Gm38495	8.02	8.91	7.42	9.06	7.2	7.74	11.63	8.6	8.68	8.33	9.42	6.68	8.66	8.72	5.87	9.31	6.83	6.91	7.96	10.93	9.74	9.74	10.31	11.07	9.47	10.67	9.66	7.82	8.83	9.61	12.48	15	11.65	15.24	10.97	12.38	20.09	13.54	13.87	13.86	15.87	10.22	13.6	13.67	8.84	15.86	10.29
268379	268379	Abca13	0.02	0.19	0.02	0.03	0.01	0.01	0.01	0.01	0.01	0.02	0.03	0	0.01	0.01	0	0	0	0.01	0	0.02	0.01	0	0.01	0.03	0	0.01	0.01	0.07	0.11	0.08	0.03	0.33	0.03	0.05	0.01	0.01	0.02	0.02	0.01	0.03	0.06	0	0.01	0.01	0	0	0
99709	99709	Clca4b	0	0	0	0	0	0	0	0	0	0	0	0	0	0	0	0	0	0	0.01	0	0	0	0	0	0	0.01	0	0	0	0	0	0	0	0	0	0	0	0	0	0	0	0	0	0	0	0	0
216829	216829	Mmgt2	16.07	15.13	10.55	14.03	13.52	13.64	18.43	10.99	15.85	13.2	16.01	10.07	10.88	14.2	9.07	10	11.91	12.52	10.34	21.87	15.29	13.5	11.69	13.89	12.66	20.01	10.79	13.33	13.85	12.56	25.01	25.48	16.56	23.59	20.6	21.81	31.84	17.31	25.33	21.96	26.97	15.4	17.07	22.27	13.67	17.04	17.95
70701	70701	Nipal1	0.56	7.03	0.49	3.23	0.18	0.32	0.32	0.47	0.18	0.46	0.82	0.05	0.25	0.34	2.32	0.04	0.1	0.33	0.23	1.06	0.51	0.33	0.35	0.35	0.35	0.87	0.19	1.89	2.52	2.48	0.87	11.84	0.77	5.43	0.27	0.51	0.55	0.74	0.29	0.77	1.38	0.08	0.39	0.53	3.5	0.07	0.15
68145	68145	Etaa1	2.15	2.07	1.66	1.97	1.61	1.97	2.51	2.51	1.86	1.8	2.54	1.51	2.56	2.46	1.82	1.75	1.9	2.14	1.94	2.83	2.04	2.01	2.68	2.55	2.17	2.75	2.32	1.74	1.97	2.21	3.35	3.49	2.61	3.32	2.46	3.15	4.34	3.95	2.98	3	4.28	2.31	4.02	3.85	2.74	2.98	2.86
18799	18799	Plcd1	12.86	14.26	11.61	13.46	10.07	11.47	21.19	11.31	16.62	12.95	12.66	10.53	12.29	11.71	7.96	12.54	10.51	11.52	11.42	13.32	13.26	15.24	13.38	12.51	12.75	11.35	12.51	14.71	13.72	11.19	20.01	24	18.22	22.64	15.35	18.35	36.6	17.81	26.57	21.54	21.31	16.11	19.29	18.36	12	21.38	15.85
66797	66797	Cntnap2	2.29	1.06	1.34	0.61	1.88	2.24	2.61	1.56	3.44	0.2	0.63	1.5	1.82	2.7	0.98	0.13	1.83	2.28	3.1	0.98	1.52	0.44	1	0.87	1.55	0.99	0.82	0.65	1.28	0.85	3.56	1.79	2.11	1.02	2.87	3.59	4.5	2.46	5.5	0.33	1.06	2.3	2.85	4.23	1.48	0.22	2.76
65100	65100	Zic5	0	0	0.02	0	0	0	0	0	0	0	0	0	0	0	0	0	0	0.03	0	0	0.02	0	0	0	0	0.02	0	0	0	0	0	0	0.03	0	0	0	0	0	0	0	0	0	0	0	0	0	0
14938	14938	Gzma	3.68	0.79	1.22	0.88	4.4	1.51	1.28	0.89	0.34	1.41	1.3	0.69	0.88	1.01	1.35	1.01	2.43	1.48	0.96	3.68	1.98	1.35	1.85	1.88	2.36	1.33	2.56	2.05	3.49	4.53	5.73	1.34	1.92	1.48	6.7	2.41	2.21	1.4	0.54	2.35	2.18	1.05	1.38	1.58	2.03	1.71	3.67
21855	21855	Timm17b	19.91	17.94	20.69	20.1	21	20.57	17.87	19.93	19.69	20.6	20.89	20.69	19.16	19.13	21.25	26.02	19.76	19.74	20.55	17.49	19.81	21.29	18.56	16.36	17.49	15.5	19.02	22.63	18.59	18.45	30.98	30.2	32.48	33.81	32	32.91	30.87	31.38	31.47	34.27	35.18	31.65	30.07	30	32.03	44.33	29.78
100503583	100503583	Fsbp	0.5	0.34	0.24	0.45	0.41	0.55	0.47	0.34	0.62	0.32	0.54	0.6	0.41	0.54	0.16	0.55	0.44	0.44	0.56	0.18	0.46	0.2	0.55	0.21	0.42	0.31	0.27	0.38	0.4	0.3	0.78	0.57	0.38	0.75	0.62	0.88	0.81	0.53	0.99	0.53	0.9	0.92	0.64	0.85	0.25	0.93	0.67
244721	244721	Zfp846	1.93	1.84	1.45	1.4	1.69	1.65	2.42	1.79	1.97	1.78	1.83	1.52	1.76	2.36	1.58	1.75	1.39	1.16	1.6	2.46	2.03	1.81	2.38	2.17	2	2.57	2.04	1.87	1.57	1.78	3	3.1	2.28	2.36	2.57	2.64	4.19	2.82	3.15	2.95	3.08	2.33	2.76	3.7	2.38	2.99	2.1
11687	11687	Alox15	16.59	1.53	3.27	14.31	10.26	14.63	2.87	5.5	7.4	6.16	4.23	4.06	5.4	10.84	2.82	0.27	4.45	3.39	4.15	39.37	24.18	6.13	9.26	8.3	13.34	58.34	8.68	5.06	3.31	6.31	25.82	2.57	5.13	24.07	15.64	23.39	4.95	8.66	11.83	10.24	7.13	6.21	8.47	16.99	4.25	0.46	6.7
223669	223669	Zfp7	5.26	2.9	2.01	2.03	3.55	3.49	4.36	3.34	3.46	1.93	2.47	2.09	3.84	4.19	3.06	2.02	1.95	2.38	3.39	9.84	3.68	3.58	4.61	3.28	3.52	7.89	2.87	2.09	2.03	3.21	8.19	4.88	3.16	3.41	5.41	5.58	7.53	5.26	5.53	3.21	4.16	3.2	6.03	6.57	4.61	3.44	2.94
22065	22065	Trpc3	3.21	1.51	0.91	0.91	2.2	2.57	7.8	2.43	4.08	1.17	0.74	1.68	3.04	3.39	2.58	1.09	1.05	2.17	2.25	3.65	2.61	2.24	4.47	2.84	2.15	3.71	1.67	1.5	2.56	2.03	5	2.53	1.43	1.53	3.35	4.11	13.48	3.83	6.52	1.95	1.25	2.56	4.77	5.31	3.89	1.85	1.59
17155	17155	Man1a	11.9	15.99	12.62	18.82	9.37	13.52	20.78	13.67	15.08	22.04	19.27	10.32	15.58	15.67	28.37	11.59	11.01	14.12	12.04	18.24	17.08	14.79	22.68	23.06	16.7	18.39	19.35	23.37	18.07	22.29	18.53	26.92	19.81	31.66	14.28	21.62	35.91	21.52	24.1	36.68	32.46	15.78	24.45	24.58	42.77	19.75	16.6
66313	66313	Smurf2	8.42	10.56	7.91	9.25	7.08	8.68	12.36	9.7	9.99	9.48	10.13	6.76	8.09	8.95	7.38	8.34	6.15	7.67	7.27	11.39	8.91	8.56	9.81	11.18	9.88	13.13	8.97	8.57	10.19	10.11	13.1	17.78	12.42	15.56	10.79	13.89	21.36	15.28	15.97	15.78	17.06	10.34	12.69	14.04	11.12	14.22	9.26
66653	66653	Brf2	7.73	7.65	8.34	8.11	8.38	7.85	8.78	8.43	8.78	8.14	8.01	8.02	8.06	7.64	6.64	10.4	7.72	7.72	8.18	6.66	8.11	10.49	6.83	6.51	7.13	6.83	8.92	8.34	7.26	7.17	12.03	12.88	13.1	13.65	12.77	12.56	15.17	13.28	14.03	13.55	13.48	12.27	12.64	11.97	10.01	17.72	11.64
21753	21753	Tes	68.22	38.88	16.88	18.69	25.46	39.29	37.69	60.83	26.65	18.41	25.37	23.37	41.99	66.82	29.54	9.17	25.84	40.73	35.55	122.96	50.51	38.08	35.82	42.59	44.76	79.42	33.34	23.56	29.37	37.95	106.17	65.46	26.49	31.44	38.8	62.84	65.12	95.78	42.6	30.64	42.72	35.74	65.89	104.77	44.53	15.63	38.95
226757	226757	Wdr26	30.24	38.66	32.07	34.84	29.98	30.13	35.59	33.51	30.36	32.94	32.5	32.18	32.51	32.63	27.62	47	32.81	29.87	33.76	38.55	36.06	40	35.86	38.15	37.87	36.4	37.05	32.56	32.56	37.3	47.07	65.09	50.33	58.6	45.7	48.2	61.49	52.77	48.52	54.81	54.72	49.23	51.02	51.16	41.63	80.09	49.46
225339	225339	Ammecr1l	14.16	14.81	10.55	12.41	10.65	11.88	17.82	13.87	11.71	12.03	13.25	9.05	13.63	14.74	13.16	11.36	9.53	11.53	14.5	24.95	15.37	15.21	15.33	16.5	14.75	22.39	15.27	10.97	13.32	14.59	22.03	24.93	16.56	20.88	16.23	19.01	30.79	21.83	18.71	20.02	22.32	13.84	21.39	23.12	19.83	19.36	14.37
64451	64451	Dip2a	6.48	6.9	4.93	6.37	4.99	5.49	9.13	6.49	7.22	6.55	7.48	4.44	6.88	7.37	4.84	5.98	4.51	5.16	5.78	11.72	7.26	7.46	7.91	9.18	7.46	10.59	6.94	5.37	6.53	7.75	10.09	11.62	7.74	10.72	7.61	8.78	15.77	10.23	11.55	10.89	12.6	6.79	10.79	11.56	7.3	10.19	6.8
207175	207175	Cetn4	2.02	2.84	2.8	2.95	2.35	1.81	4.49	2.08	4.82	3.52	3.11	2.2	2.73	2.8	1.76	2.34	2.41	3.05	2.44	2.01	2.74	3.26	2.63	2.88	2.07	2.82	2.13	2.97	2.61	1.78	3.14	4.79	4.4	4.97	3.57	2.89	7.75	3.27	7.71	5.85	5.24	3.36	4.28	4.4	2.66	3.99	3.64
22381	22381	Tceal9	237.47	295.58	162.33	210.77	179.94	213.06	421.58	238.67	315.53	191.07	214.36	178.04	230.05	221.34	173.19	153.89	184.63	252.39	208.99	396	287.07	287.58	220.29	233.55	180.24	281.7	183.77	251.59	249.55	223.8	369.56	497.62	254.81	354.56	274.24	340.79	728.39	375.8	504.33	317.93	360.99	272.32	361	347.07	261.1	262.25	278.35
209760	209760	Tmc7	1.82	2.49	3.1	2.34	4.24	2.6	0.88	2.21	2.32	2.32	1.52	4.32	1.93	1.96	1.52	3.77	4.15	2.46	2.16	0.65	1.78	2.64	1.63	1.16	3	1.38	2.76	1.63	2.04	1.95	2.83	4.19	4.87	3.94	6.45	4.15	1.52	3.48	3.71	3.86	2.55	6.61	3.03	3.08	2.28	6.42	6.25
26951	26951	Zw10	7.15	6.7	6.36	7.07	5.62	6.8	8.68	7.08	6.75	6.69	7.29	5.11	7.75	6.77	5.89	8.07	5.69	4.94	6.37	9.48	6.81	8.46	9.1	8.84	7.29	7.3	7.78	7.38	6.44	8.07	11.13	11.28	9.98	11.89	8.57	10.87	14.99	11.15	10.78	11.12	12.28	7.82	12.16	10.62	8.88	13.75	8.58
19132	19132	Prph	0.42	0.27	0.4	2.24	0.49	6.2	54.95	0.12	55.09	0.66	0.48	0.39	0.25	0.41	4.82	0.56	0.45	10.82	0.19	0.43	0.71	0.72	0.44	4.35	1.29	5.21	0.83	1.19	7.23	0.26	0.66	0.46	0.62	3.77	0.75	9.91	94.95	0.19	88.05	1.1	0.81	0.59	0.39	0.65	7.27	0.95	0.68
68338	68338	Golt1a	0.5	0	0.02	0	0.35	0.64	0.11	0.21	0.16	0	0	0	0.1	0.25	3.38	0	0.05	0.02	0.13	1.03	0.18	0.1	0.34	0.07	0.12	1.11	0.14	0	0.02	0.09	0.77	0	0.04	0	0.53	1.02	0.19	0.33	0.26	0	0	0	0.15	0.39	5.09	0	0.07
233005	233005	Cyp2a22	0	0	0	0	0	0	0	0	0	0	0	0	0	0.02	10.5	0	0	0	0	0	0	0	0	0	0	0	0	0	0.02	0	0	0	0	0	0	0	0	0	0	0	0	0	0	0.03	15.84	0	0
22640	22640	Zfp1	7.74	5.57	5.58	4.85	6.27	5.79	6.71	6.83	5.57	4.37	5.4	5.48	6.81	7.19	5.36	6.98	5.83	5.09	6.48	8.74	6.37	6.93	5.98	5.39	5.75	6.71	5.22	6.85	4.49	5.38	12.04	9.37	8.75	8.16	9.55	9.26	11.59	10.76	8.91	7.28	9.1	8.38	10.68	11.27	8.08	11.9	8.79
72080	72080	Sapcd2	1.22	0.8	0.68	0.85	0.67	0.88	0.72	1.05	0.71	0.99	1.53	0.61	1.82	1.37	0.7	0.93	0.71	0.77	1.06	1.55	1.22	1.62	2.45	0.97	0.82	0.78	0.86	0.79	0.89	1.3	1.91	1.34	1.06	1.43	1.02	1.41	1.25	1.66	1.14	1.65	2.58	0.94	2.85	2.15	1.06	1.59	1.07
22704	22704	Zfp46	10.51	11.61	11.76	12	12.32	11.23	13.56	11.12	14.19	11.06	10.19	6.8	6.21	6.73	3.97	8.9	6.85	5.25	6.3	7.06	6.69	8.42	10.15	12.07	13.16	11.59	13.36	8.63	10.13	10.81	16.36	19.55	18.47	20.19	18.77	17.96	23.43	17.5	22.69	18.41	17.15	10.4	9.74	10.55	5.98	15.17	10.32
329731	329731	Tafa3	1.6	1.42	1.89	1.27	2.05	1.66	0.73	1.24	1.32	1.05	1.02	2.2	1.22	1.49	0.97	1.33	1.94	1.28	1.3	0.48	1.21	1.09	1.08	0.77	1.58	0.6	1.34	0.72	1.18	0.9	2.49	2.39	2.97	2.14	3.12	2.66	1.26	1.96	2.11	1.75	1.72	3.36	1.91	2.33	1.46	2.26	2.92
80284	80284	Smim12	35.45	32.7	33.38	26.93	36.01	30.53	35.25	31.68	39.22	28.81	31.43	40.2	35.47	37.99	28.08	32.65	36.68	35.29	35.05	33.12	35.84	36	32.01	24.48	29.8	24.48	27.68	35.21	31.26	27.92	55.17	55.06	52.4	45.31	54.89	48.84	60.9	49.87	62.69	47.94	52.93	61.49	55.66	59.58	42.33	55.65	55.29
70419	70419	2810408A11Rik	3.58	2.22	1.22	1.74	2.16	1.82	2.91	2.21	1.9	1.49	1.27	1.55	1.76	2.96	1.36	1.27	1.49	1.19	2.1	4.45	3.24	2.76	1.51	1.77	2.64	3.08	1.23	1.61	1.08	1.42	5.56	3.73	1.91	2.94	3.3	2.91	5.02	3.49	3.04	2.47	2.14	2.36	2.76	4.64	2.06	2.17	2.25
67755	67755	Ddx47	36.04	31.81	30.02	29.59	33.15	33.23	38.68	34.61	41.99	32.6	35.47	33.98	35.76	35.43	30.94	38.17	33.52	33.48	35.91	44.36	35.56	42.03	37.26	31.49	32.38	36.35	33.85	33.24	34.21	34.26	56.08	53.55	47.12	49.78	50.52	53.16	66.82	54.5	67.11	54.25	59.74	51.98	56.11	55.56	46.64	65.05	50.54
209590	209590	Il23r	0.07	0	0	0	0	0.03	0	0	0.02	0.03	0.02	0.02	0.02	0	0.02	0.03	0.03	0	0	0.03	0.04	0.02	0.03	0.1	0.05	0.07	0.1	0.12	0.02	0.11	0.1	0	0	0	0	0.05	0	0	0.03	0.05	0.03	0.03	0.03	0	0.03	0.06	0.05
20924	20924	Supt5	38.83	39.88	32.46	34.3	31.05	30.83	41.57	33.72	35.1	35.33	38.15	25.27	30.2	32.54	25.52	43.32	27.06	26.2	28.35	42.86	32.53	42.72	38.13	39.28	36.77	43.19	36.75	33.79	35.04	38.75	60.44	67.14	50.94	57.7	47.33	49.32	71.83	53.09	56.1	58.79	64.24	38.66	47.39	51.02	38.48	73.82	40.8
59025	59025	Usp14	21.64	23.43	21.02	21.13	21.21	20.42	24.6	22.4	21.73	21.15	24.57	21.36	21.65	24.15	19.91	28.53	21.09	19.55	21.17	26.51	21.84	27.24	27.27	23.18	21.68	25.79	23.01	24.07	20.76	23.35	33.67	39.44	32.99	35.55	32.33	32.66	42.51	35.26	34.73	35.19	41.38	32.67	33.98	37.86	30.01	48.62	31.8
319171	319171	Hist1h2ap	0.9	0.44	0	0	0	0	0	0	0	0.39	0	0	0	0	0	0.23	0	0	0.31	0	0.48	0	0	0.29	0	0.35	0	0.31	0.4	0.45	1.41	0.74	0	0	0	0	0	0	0	0.64	0	0	0	0	0	0.39	0
380928	380928	Lmo7	12.52	17.14	24.63	21.74	25.12	15.36	8.15	14.64	11.98	16.96	10.72	21.01	13.08	14.37	10.8	43.17	22.9	13.27	14.87	5.21	12.26	32.54	15.35	10.43	14.95	7.18	19.52	11.83	12.68	13.08	19.49	28.85	38.67	36.57	38.28	24.57	14.08	23.05	19.15	28.22	18.06	32.13	20.53	22.54	16.29	73.57	34.52
68977	68977	Haghl	20.87	15.33	13.13	13.96	21.92	18.47	23.12	19.29	27.19	16.08	14.71	18.42	18.16	19.62	13.63	21.97	20.27	17.47	19.01	28.25	22.24	26.69	19.68	17.24	20.5	20.17	16.21	16.84	14.63	16.48	32.48	25.81	20.61	23.48	33.41	29.54	39.95	30.38	43.46	26.76	24.76	28.17	28.5	30.77	20.55	37.44	30.56
232367	232367	Vmn2r27	0.02	0	0	0	0	0	0	0	0	0	0	0	0	0	0	0	0	0	0	0	0	0	0	0	0	0	0	0	0	0	0.03	0	0	0	0	0	0	0	0	0	0	0	0	0	0	0	0
13105	13105	Cyp2d9	0	0	0	0	0	0	0	0.03	0	0.03	0	0	0.03	0	19.22	0.06	0	0	0	0.03	0	0	0.03	0	0.03	0.03	0.03	0	0.03	0.03	0	0	0	0	0	0	0	0.04	0	0.04	0	0	0.04	0	28.98	0.1	0
330096	330096	Shisa3	0.96	1.78	0.46	1.99	0.73	1.71	0.28	0.59	0.56	1.06	3.59	0.92	0.56	0.31	0.36	0.54	1.55	1.74	0.37	0.22	0.53	0.53	1.03	4.55	2.81	3.89	2.36	5.44	2.85	5.56	1.5	3	0.73	3.35	1.11	2.73	0.48	0.93	0.9	1.76	6.04	1.41	0.87	0.48	0.54	0.93	2.33
17227	17227	Mcpt4	3.18	1.56	0.26	1.19	1.28	3.56	2.06	1.31	2.55	5.31	1.2	1.28	1.28	0.38	0.94	0.91	6.37	4.55	0.82	0.47	1.14	1.92	2.36	7.69	2.72	2.42	6.63	5.54	3.68	1.27	4.95	2.62	0.41	2.01	1.96	5.69	3.56	2.07	4.08	8.83	2.02	1.96	2.01	0.59	1.42	1.55	9.6
381605	381605	Tbc1d2	2.14	1.78	1.07	1.28	1.41	2.04	1.48	1.73	1.25	1.25	2	0.83	1.92	2.15	1.17	1.25	0.93	1.23	1.78	4.84	2.33	1.71	2.22	1.9	1.91	4.32	1.53	1.59	1.69	2.42	3.32	3	1.68	2.15	2.15	3.26	2.56	2.72	2	2.08	3.37	1.27	3.02	3.37	1.76	2.13	1.41
23850	23850	Pappa2	0.03	0.09	0.05	0.1	0.03	0.03	0.02	0.07	0.01	0.17	0.08	0.04	0.02	0.02	0	0.38	0.03	0.02	0.02	0.01	0.03	0.11	0.05	0.05	0.06	0.05	0.09	0.09	0.06	0.07	0.04	0.15	0.08	0.17	0.04	0.05	0.04	0.11	0.02	0.28	0.14	0.06	0.03	0.04	0.01	0.65	0.05
100039177	100039177	Mup16	0	0	0	0	0	0	0	0	0	0	0	0	0	0	15.64	0	0	0	0	0	0	0	0	0.1	0	0	0	0	0	0	0	0	0	0	0	0	0	0	0	0	0	0	0	0	23.58	0	0
407823	407823	Baz2b	5.26	5.54	4.23	5.01	4.34	4.65	7.86	5.28	6.39	4.46	5.91	4.55	5.65	6.52	4.38	5.76	4.39	4.31	5.27	7.06	6.48	6.25	5.93	8.02	6.86	7.6	6.36	3.81	4.57	5.92	8.19	9.32	6.63	8.43	6.61	7.43	13.57	8.32	10.22	7.42	9.95	6.95	8.87	10.22	6.6	9.82	6.62
109778	109778	Blvra	19.4	22.01	21.41	22.38	17.5	18.15	23.87	17.61	22.2	25.99	30.22	22.18	28.3	20.59	22.61	19.43	23.41	28.76	25.41	27.76	29.56	24.55	26.69	29.01	24.58	20.65	24.41	28.24	22.75	25.74	30.19	37.05	33.61	37.65	26.68	29.04	41.24	27.73	35.49	43.24	50.9	33.92	44.41	32.29	34.09	33.12	35.29
56434	56434	Tspan3	98.13	99.91	103.14	110.66	112.24	109.03	117.61	110.95	118.96	117.98	100.13	108.93	99.67	94.59	68.64	164.95	128.98	111.5	99.46	99.5	96.7	125.61	92.96	98.33	113.38	78.54	114.75	106.33	99.15	94.36	152.72	168.2	161.89	186.16	171.07	174.39	203.2	174.7	190.13	196.31	168.63	166.61	156.4	148.33	103.48	281.09	194.45
268729	268729	Frmpd2	0.14	0.11	0.2	0.1	0.31	0.08	0.04	0.12	0.11	0.16	0.12	0.18	0.03	0.03	0.06	0.45	0.18	0.02	0.09	0.03	0.13	0.48	0.07	0.07	0.15	0.11	0.15	0.1	0.04	0.1	0.22	0.18	0.32	0.16	0.47	0.13	0.08	0.19	0.17	0.26	0.2	0.28	0.05	0.04	0.09	0.77	0.27
54387	54387	Mcm3ap	10.41	8.72	9.2	8.51	9.56	8.67	11.31	9.05	9.78	9.6	8.61	8.57	9.06	10.02	7.04	11.39	8.41	7.33	8.8	10.09	9.2	11.07	9.8	9.4	10.33	9.17	9.5	8.89	8.48	8.72	16.2	14.69	14.44	14.32	14.56	13.87	19.54	14.24	15.63	15.98	14.49	13.11	14.22	15.71	10.62	19.41	12.68
74068	74068	Asz1	0	0	0	0	0	0	0	0	0.08	0	0.03	0.04	0	0	0	0	0	0	0	0	0	0	0.04	0	0	0	0	0	0	0	0	0	0	0	0	0	0	0	0.13	0	0.06	0.06	0	0	0	0	0
109181	109181	Trip11	5.32	6.04	4.95	5.48	4.89	5.52	7.15	5.26	6.09	5.31	5.99	5.04	5.71	5.59	4.67	5.63	4.91	5.05	5.29	6.41	5.46	5.24	7.53	6.85	6.37	7.11	7.36	4.85	5.78	6.52	8.27	10.18	7.77	9.22	7.46	8.82	12.35	8.28	9.74	8.83	10.08	7.7	8.97	8.77	7.04	9.59	7.41
233826	233826	Palb2	1.11	0.94	1.19	0.98	0.74	0.93	0.95	1.28	0.93	1.32	1.54	0.58	1.11	1.01	0.65	0.62	1.2	1.05	1.12	1.3	1.17	1.12	1.81	1.38	1.3	1.42	1.07	1.21	1.03	0.99	1.72	1.59	1.87	1.65	1.12	1.48	1.64	2.02	1.49	2.2	2.59	0.89	1.74	1.59	0.97	1.05	1.81
70359	70359	Gtpbp3	11.6	9.93	8.54	9.79	9.06	9.17	12.95	10.57	13.92	10.56	11.94	9.73	11.16	11.97	9.42	11	8.5	9.66	10.7	13.27	11.63	12.68	11.55	11.37	11.28	10.68	10.15	11.56	9.54	10.98	18.05	16.73	13.41	16.47	13.82	14.66	22.38	16.65	22.25	17.57	20.11	14.88	17.51	18.77	14.19	18.75	12.81
74558	74558	Gvin1	4.59	3.68	7.36	7.43	4.65	4.36	2.86	4.51	1.8	6.01	9.24	3.31	4.66	6.85	4.86	3.42	3.72	3.95	4.23	11.59	5.97	5.09	4.27	7.09	4.53	16.89	6.34	4.24	4.45	6.18	7.14	6.19	11.55	12.5	7.09	6.98	4.94	7.11	2.88	10	15.56	5.06	7.31	10.74	7.33	5.82	5.61
17384	17384	Mmp10	17.79	2.67	1.03	0.89	4.01	4.43	4.3	20.04	2.36	1.11	3.02	5.07	6.65	7.04	5.54	0.08	1.49	9.36	3.47	29.62	7.28	4.24	0.77	13.95	4.67	17.62	1.66	4.94	3.26	8.19	27.68	4.49	1.61	1.49	6.1	7.09	7.44	31.56	3.78	1.85	5.09	7.76	10.43	11.04	8.35	0.13	2.25
100040018	100040018	Gmfg-ps	0.19	0	0.06	0.24	0.06	0.06	0	0	0.22	0	0.12	0.07	0	0	0	0.07	0.18	0.06	0	0.06	0.13	0	0	0.18	0.06	0	0.06	0.06	0.2	0	0.29	0	0.1	0.4	0.1	0.09	0	0	0.36	0	0.21	0.1	0	0	0	0.11	0.28
234371	234371	Tmem161a	22.82	20.77	23.45	19.96	24.07	21.17	19.31	22.96	22.3	18.89	16.64	23.56	20.47	20.88	17.73	27.58	24.3	19.87	23.36	16.21	19.44	25.03	18.3	14.93	20.29	13.16	19.48	19.06	19.58	16.53	35.52	34.97	36.82	33.57	36.68	33.86	33.36	36.15	35.64	31.43	28.02	36.04	32.12	32.74	26.73	46.99	36.64
229512	229512	Smg5	21.25	18.55	16.45	17.17	17.14	17.28	24.32	18.14	22.29	15.15	18.12	14.97	18.17	18.79	14.46	19.94	14.93	15.47	18.13	23.52	16.48	19.6	20.66	19.19	18.36	19.52	19.43	16.31	17.25	18.64	33.06	31.22	25.81	28.88	26.13	27.64	42.02	28.56	35.63	25.21	30.52	22.9	28.52	29.46	21.8	33.98	22.51
433597	433597	Aadacl2fm2	0	0	0	0	0	0	0	0	0	0	0	0	0	0	0	0	0	0	0	0	0	0	0	0	0	0	0	0	0.04	0	0	0	0	0	0	0	0	0	0	0	0	0	0	0	0	0	0
231798	231798	Lrch4	21.49	19.36	19.87	20.6	18.48	17.72	18.32	19.36	18.8	22.14	26.48	18.34	21.93	20.2	14.95	26.16	17.03	18.12	22.08	29	23.55	23.28	21.35	29.99	23.83	25.68	23.94	21.06	19.52	24.99	33.44	32.6	31.19	34.66	28.17	28.34	31.65	30.49	30.04	36.85	44.59	28.05	34.42	31.68	22.54	44.58	25.67
17110	17110	Lyz1	117.64	114.96	122.62	142.69	89.1	102.11	89.94	112.91	50.54	174.14	223.87	247.26	304.27	133.92	114.39	98.56	188.08	302.23	254.26	206.7	290.64	110.91	189.91	257.61	220.31	157.97	216.25	299.4	165.25	185.22	183.09	193.54	192.48	240.04	135.8	163.32	155.4	177.78	80.78	289.77	377.01	378.19	477.47	209.99	172.46	167.96	283.55
664883	664883	Nova1	2.59	2.63	3.45	3.04	3.13	3.11	3.7	3.63	2.27	2.54	2.02	2.74	3.79	2.73	2.2	1.74	2.99	1.83	2.9	4.28	2.83	3.12	5.18	3.5	2.83	2.18	3.45	4.84	2.35	3.44	4.03	4.42	5.41	5.11	4.77	4.98	6.39	5.72	3.64	4.23	3.4	4.2	5.95	4.29	3.32	2.96	4.51
70859	70859	Lrrc63	0.02	0.03	0	0.02	0.03	0	0	0	0	0	0.07	0.03	0.08	0	0.04	0	0.05	0.02	0.02	0	0.03	0	0	0.09	0.02	0.05	0.02	0	0.07	0.02	0.04	0.04	0	0.04	0.05	0	0	0	0	0	0.12	0.04	0.12	0	0.07	0	0.08
108672	108672	Zdhhc15	1.36	0.66	0.59	1.07	1.12	1.26	1.21	1.22	0.9	0.84	0.93	0.44	0.98	1.52	0.59	1.08	0.66	0.77	0.92	2.48	0.86	1.36	1.49	1.34	1.14	3.39	1.21	0.8	0.78	1.06	2.11	1.11	0.93	1.8	1.71	2.02	2.09	1.92	1.43	1.39	1.57	0.67	1.53	2.39	0.89	1.84	0.99
224014	224014	Fgd4	2.16	1.61	1.79	1.84	2.03	2.06	2.91	2.66	2.65	1.57	2.06	2.24	2.75	3.05	2.64	1.83	2.33	2.58	3.03	2.92	3.35	2.37	2.13	3.27	3.19	2.41	2.95	2	2.07	2.4	3.37	2.71	2.8	3.09	3.1	3.3	5.03	4.19	4.24	2.61	3.47	3.42	4.32	4.79	3.98	3.12	3.51
11704	11704	Amelx	0	0	0	0	0	0	0	0	0	0	0	0	0	0	0	0	0	0	0	0	0	0	0.07	0	0	0	0	0	0	0	0	0	0	0	0	0	0	0	0	0	0	0	0	0	0	0	0
620807	620807	Mup6	0	0	0.09	0	0	0	0	0	0	0	0	0	0	0	1.03	0	0	0	0	0	0	0	0	0	0	0	0	0	0	0	0	0	0.13	0	0	0	0	0	0	0	0	0	0	0	1.55	0	0
244562	244562	Abcc12	0.04	0.02	0	0.02	0.02	0.03	0.03	0.12	0	0.03	0	0	0.02	0.04	0.01	0	0.01	0.03	0.01	0.04	0.02	0.04	0.04	0	0	0.03	0.01	0	0.01	0.02	0.05	0.04	0	0.03	0.04	0.05	0.05	0.18	0	0.06	0	0	0.04	0.06	0.02	0	0.02
104082	104082	Wdr7	4.06	4.25	3.88	4.39	3.91	4.18	4.34	3.56	4.3	3.86	4.59	4.5	3.94	4.13	3.71	5.44	4.2	4.21	4.08	3.4	4.24	4.42	4.65	5.34	5.41	3.97	5.59	3.74	4.89	4.77	6.32	7.15	6.09	7.39	5.96	6.68	7.5	5.6	6.87	6.42	7.73	6.88	6.19	6.48	5.6	9.27	6.33
100043467	100043467	Gm4454	0	0	0	0	0	0	0	0	0	0	0.01	0	0	0	0	0	0	0	0	0	0	0	0	0	0	0	0	0	0	0	0	0	0	0	0	0	0	0	0	0	0.02	0	0	0	0	0	0
94185	94185	Tnfrsf21	25.46	67.14	22.99	39.44	16.02	13.85	12.03	19.12	14.49	22.36	27.56	18.32	12.68	15.02	9.24	16.81	13.7	17.46	19.58	32.31	24.73	14.47	10.51	16.77	22.88	26.1	13.08	38.03	30.28	26.76	39.61	113.02	36.08	66.34	24.42	22.15	20.78	30.11	23.15	37.21	46.41	28.02	19.91	23.56	13.93	28.65	20.66
75906	75906	Fam184a	0.93	0.52	0.36	0.4	0.31	0.58	1.77	0.93	1.54	0.6	0.4	0.49	0.5	0.58	0.7	0.23	0.3	0.65	0.65	1.44	0.83	0.71	0.41	0.89	0.77	0.78	0.57	0.42	0.68	0.49	1.45	0.88	0.57	0.67	0.47	0.92	3.06	1.46	2.46	1	0.67	0.76	0.79	0.92	1.05	0.38	0.46
12522	12522	Cd83	7.93	3.74	6.07	6.67	6.62	5.98	4.11	3.63	3.75	6.32	5.47	5.88	5.55	4.48	4.32	4.73	7.76	7.87	6.29	6.45	5.39	5.02	6.12	8.63	9.36	6.31	7.75	7.83	4.51	7.27	12.35	6.29	9.53	11.22	10.08	9.56	7.1	5.72	5.99	10.52	9.21	8.99	8.7	7.02	6.52	8.07	11.7
72429	72429	Dnajc25	6.31	10.21	9.68	11.35	6.74	8.56	7.59	7.59	6.34	10.91	11.54	6.64	8.81	7.15	10.08	8.18	6.65	8	6.99	9.52	8.05	7.66	9.27	9.71	6.81	9.52	9.1	10.61	10.4	9.73	9.81	17.19	15.19	19.09	10.27	13.7	13.11	11.95	10.14	18.15	19.43	10.16	13.82	11.22	15.19	13.93	10.02
66707	66707	Nkapl	0.34	0.47	0.19	0.36	0.39	0.15	0.52	0.09	0.32	0.3	0.46	0.26	0.52	0.33	0.26	0.29	0.29	0.37	0.3	0.48	0.33	0.4	0.51	0.32	0.37	0.31	0.22	0.52	0.16	0.12	0.54	0.8	0.3	0.61	0.6	0.24	0.9	0.15	0.51	0.51	0.77	0.4	0.82	0.52	0.38	0.5	0.43
102640003	102640003	Gm36182	0.01	0.01	0.01	0	0	0	0	0	0	0	0.03	0	0	0.01	0	0	0	0	0.01	0.02	0.01	0	0.01	0.01	0.01	0.01	0.01	0	0	0.06	0.01	0.01	0.01	0	0	0	0	0	0	0	0.05	0	0	0.02	0	0	0
14950	14950	H13	66.56	77.87	59.04	70.14	57.46	63.43	66.34	62.29	60.49	69.7	79.93	55.06	63.85	55.65	69.27	55.02	55.7	65.81	57.18	97.91	75.5	73.12	59.56	71.63	56.7	83.61	58.53	66.23	62.19	72.52	103.58	131.09	92.67	117.99	87.57	101.46	114.62	98.07	96.68	115.98	134.61	84.21	100.19	87.26	104.43	93.76	83.97
329628	329628	Fat4	1.63	1.82	2.08	2.49	1.45	2.39	3.78	2.42	3.58	2.1	2.14	1.55	2.09	2.24	1.54	2.75	1.86	2.18	1.6	2.47	2.58	2.98	1.78	2.92	3.09	2.49	2.95	1.35	2.52	2.01	2.53	3.07	3.27	4.19	2.21	3.83	6.54	3.81	5.72	3.5	3.61	2.37	3.28	3.52	2.33	4.69	2.8
328780	328780	Prss34	0.51	0.22	0	0.15	0	0.05	0	0.11	0.19	0.05	0.11	0.11	0.06	0	0	0.08	0.61	0.33	0.13	0	0.12	0.12	0.12	0.27	0.38	0.05	0.39	0.46	0.23	0	0.79	0.37	0	0.26	0	0.08	0	0.17	0.3	0.09	0.19	0.17	0.09	0	0	0.14	0.92
242362	242362	Manea	3.33	4.44	2.89	3.37	2.34	4.06	5.42	3.96	4.2	3.88	4.46	3.17	4.1	4.11	3.7	3.43	3.48	3.98	3.68	5.5	5.26	4.15	3.55	4.68	4.69	4.73	4.41	3.81	4.37	4.59	5.18	7.48	4.53	5.68	3.56	6.49	9.37	6.23	6.71	6.46	7.52	4.85	6.44	6.45	5.58	5.85	5.24
70312	70312	Cactin	17.58	17.39	14.42	14.95	12.21	13.92	17.61	14.39	15.83	15.92	20.42	12.06	16.81	16.21	11.24	14.18	11.54	14.27	14.79	21.64	15.9	16.76	16.13	16.56	15.08	18.23	14.92	15.38	16.61	17.43	27.36	29.28	22.63	25.14	18.61	22.26	30.43	22.65	25.29	26.49	34.39	18.45	26.38	25.42	16.95	24.16	17.4
117148	117148	Necab2	0.53	0.11	0.03	0.08	0.13	0.57	2.91	0.13	2.87	0.09	0.11	0.17	0.44	0.63	0.46	0.03	0.19	0.45	0.78	0.73	0.11	0.22	0.56	0.48	0.3	0.29	0.44	0.39	0.37	0.25	0.83	0.18	0.04	0.14	0.19	0.91	5.03	0.21	4.59	0.14	0.19	0.25	0.69	0.99	0.69	0.05	0.28
66177	66177	Ubl5	230.02	210.94	225.18	194.22	235	218.94	178.33	200.82	220.52	219.04	204.35	242.45	223.53	230.1	204.24	188.77	239.59	256.08	232	210.55	229.68	227.48	207.96	186.48	206.16	208.28	184	272.7	217.14	217.94	357.97	355.13	353.45	326.73	358.16	350.19	308.12	316.2	352.46	364.48	344.14	370.83	350.77	360.8	307.91	321.7	361.2
69035	69035	Zdhhc3	27.06	24.38	23.69	24.79	24.4	25.18	23.51	26.37	23.15	25.23	26.2	23.9	24.47	25.56	19.28	23.82	22.77	22.19	25.28	27.46	23.17	23.64	28.87	24.76	25.94	25.64	25.43	23.02	23.25	27.46	42.11	41.05	37.19	41.7	37.19	40.28	40.62	41.52	37	41.99	44.12	36.55	38.41	40.08	29.06	40.6	34.33
73649	73649	Cybrd1	1.9	0.45	0.99	1.81	1.72	2.94	6.16	1.78	5.47	1.48	0.97	0.64	1.25	1.35	2.42	0.92	1.36	1.61	1.16	3.23	1.88	2.9	1.82	1.37	2.05	2.8	1.79	1.38	2.2	1.81	2.95	0.76	1.55	3.05	2.62	4.7	10.64	2.8	8.75	2.46	1.64	0.98	1.96	2.12	3.65	1.57	2.05
102032	102032	Smim19	21.69	17.16	22.03	19.44	23.34	26.91	19.08	20.61	25.41	18.68	18.74	28.24	23.13	25.05	20.01	22.13	27.39	23.97	28.85	14.15	22.01	19.75	18.08	15.74	21.74	12.78	16.54	20.53	18.78	17.15	33.76	28.89	34.57	32.7	35.57	43.04	32.97	32.45	40.61	31.09	31.56	43.2	36.29	39.28	30.16	37.71	41.29
93746	93746	Gprc5d	0	0	0	0.03	0	0	0.08	0	0	0	0	0	0	0.04	0.04	0	0	0	0	0.04	0.04	0.04	0.04	0.04	0	0	0	0	0	0	0	0	0	0.06	0	0	0.14	0	0	0	0	0	0	0.06	0.05	0	0
71805	71805	Nup93	13.9	16.17	13.61	15.75	11.86	12.93	16.3	13.91	14.29	14.1	19.59	10.92	13.32	13.34	10.79	16.48	13.4	13.52	13.03	20.28	14.61	17.18	18.2	16.56	14.45	15.34	15.49	13.4	13.24	15.95	21.64	27.22	21.36	26.49	18.07	20.68	28.16	21.91	22.84	23.47	32.99	16.7	20.9	20.92	16.27	28.09	20.19
75687	75687	Ripor1	15.98	20.48	16.47	18.54	14.5	18.28	25.61	17.75	22.88	23.2	21.65	15.29	18.53	19.97	14.82	25.64	13.87	17.36	16.08	21.76	19.59	23.37	19.02	24.68	19.2	19.61	19.15	18.86	21.78	19.2	24.86	34.48	25.85	31.19	22.1	29.23	44.25	27.96	36.57	38.61	36.46	23.38	29.08	31.32	22.34	43.7	20.91
14559	14559	Gdf1	1.76	0.86	2.82	1.48	3.45	2.96	0.95	2.92	4.15	2.05	0.87	4.11	6.76	3.65	2.22	1.61	5.83	1.39	8.16	1.25	2.78	2.29	2.99	0.13	1.02	0.28	5.49	2.04	0.6	0.29	2.73	1.45	4.43	2.49	5.26	4.73	1.63	4.59	6.63	3.42	1.46	6.29	10.61	5.72	3.35	2.74	8.78
230376	230376	Haus6	2.74	2.53	1.94	2.45	1.54	1.77	2.67	2.42	2.03	1.95	3.25	1.8	2.57	2.74	2.01	2.09	1.8	1.72	2.2	3.26	2.39	2.26	3.45	2.92	2.54	2.82	2.6	2.03	2.18	2.76	4.26	4.26	3.05	4.12	2.35	2.82	4.61	3.81	3.24	3.24	5.47	2.76	4.03	4.29	3.03	3.57	2.71
70357	70357	Kcnip1	0.92	0.02	0	0	0.16	0.59	1.45	1.04	3.39	0.07	0	0.12	1.62	2.42	0.34	0	0.36	1.73	0.76	1.26	0.53	0.84	0.85	0.54	0.55	0.41	0.96	0.21	0.43	0.66	1.44	0.04	0	0	0.24	0.94	2.5	1.63	5.42	0.11	0	0.19	2.53	3.79	0.51	0	0.55
115486944	115486944	LOC115486944	0	0	0	0	0	0	0	0	0	0	0	0	0	0	0	0	0	0	0	0	0	0	0	0	0	0	0	0	0	0.03	0	0	0	0	0	0	0	0	0	0	0	0	0	0	0	0	0
15366	15366	Hmmr	1.65	2.44	2.62	2.98	1.1	1.61	2.27	2.64	1.85	3.54	5.54	1.08	3.37	2.82	1.47	1.85	1.19	2.03	1.66	3.51	3.5	2.47	5.25	2.99	2.05	3.33	2.83	2.3	3.2	3.19	2.57	4.11	4.11	5.02	1.68	2.57	3.92	4.15	2.96	5.89	9.33	1.66	5.3	4.43	2.22	3.16	1.8
68927	68927	Ptcd2	14.22	12.45	15.44	13.68	17.38	13.37	11.29	14.24	14.28	14.66	13.36	16.31	15.06	14.16	14.04	20.84	16.09	14.47	14.3	12.61	13.23	17.15	14.75	11.68	14.22	12.56	15.61	16.41	13.67	13.16	22.13	20.95	24.23	23.01	26.49	21.39	19.5	22.43	22.83	24.39	22.5	24.95	23.63	22.2	21.17	35.51	24.26
279561	279561	Wnk3	0.11	0.17	0.14	0.15	0.14	0.11	0.23	0.18	0.14	0.22	0.17	0.14	0.13	0.14	0.11	0.21	0.17	0.14	0.19	0.25	0.17	0.16	0.18	0.21	0.2	0.13	0.17	0.1	0.13	0.2	0.17	0.29	0.23	0.26	0.21	0.17	0.39	0.28	0.23	0.37	0.29	0.21	0.21	0.22	0.17	0.36	0.26
20630	20630	Snrpc	92.39	80.81	88.59	79.23	94.21	95.75	86.66	92.04	95.49	85.74	92.33	88.61	91.65	93.3	70.91	86.91	95.89	92.69	97.2	95.48	100.51	100.6	88.61	74.16	76.72	74.21	78.02	90.19	78.91	92.2	143.79	136.05	139.06	133.28	143.58	153.15	149.73	144.92	152.62	142.66	155.49	135.53	143.82	146.3	106.9	148.11	144.55
14176	14176	Fgf5	0	0.12	0.23	0.15	0.05	0.14	0.28	0.03	0.34	0.12	0.28	0.05	0.02	0.07	0.07	0.15	0.08	0.38	0	0.02	0.15	0.11	0.05	0.3	0.05	0.29	0.03	0.09	0.69	0.12	0	0.2	0.35	0.24	0.08	0.23	0.48	0.05	0.55	0.2	0.47	0.08	0.03	0.12	0.1	0.25	0.13
72144	72144	Slc37a3	13.99	8.47	7.77	9.03	9.52	11.9	15.07	11.66	10.88	9.79	8.59	7.34	12.26	13.8	10.93	9.05	7.38	9.46	10.33	18.13	12.17	11.77	15.34	12.21	13.79	16.35	11.18	9.93	10.64	10.84	21.77	14.27	12.19	15.2	14.5	19.04	26.04	18.36	17.38	16.29	14.47	11.23	19.24	21.64	16.48	15.42	11.12
20675	20675	Sox3	0.02	0	0	0	0	0	0	0	0	0	0.02	0	0	0	0.04	0	0.04	0	0	0	0	0	0.02	0.04	0	0.02	0.02	0	0	0	0.03	0	0	0	0	0	0	0	0	0	0.03	0	0	0	0.06	0	0.06
102640586	102640586	LOC102640586	0.02	0.06	0.06	0.06	0.11	0.04	0.07	0	0.02	0.06	0.02	0.02	0.08	0.04	0.02	0.17	0.02	0.04	0.07	0.04	0.07	0.28	0.06	0.06	0.08	0.06	0.06	0.12	0.04	0.06	0.03	0.1	0.1	0.1	0.16	0.06	0.13	0	0.04	0.1	0.03	0.03	0.13	0.07	0.03	0.29	0.03
67011	67011	Mettl6	12.55	14.42	10.78	13.86	11.98	12.17	18.56	13.62	14.44	11.61	12.68	11.11	14.68	13.21	10.91	12.15	10.41	11.43	14.16	19.06	14.17	15.32	13.66	13.68	12.17	15	11.94	11.85	12.65	13.26	19.53	24.28	16.91	23.31	18.26	19.47	32.07	21.45	23.08	19.31	21.36	16.99	23.03	20.71	16.45	20.7	15.69
107477	107477	Guca1b	1.23	0.85	0.98	0.68	1.35	0.98	2.32	0.93	2.04	0.6	0.71	1.12	0.83	1.14	0.95	0.95	0.62	0.87	0.83	0.72	0.8	0.83	1.09	0.38	0.98	1.01	0.83	0.78	0.73	0.64	1.91	1.42	1.54	1.15	2.05	1.57	4	1.46	3.26	1	1.19	1.72	1.3	1.78	1.44	1.62	0.94
225215	225215	Rsl24d1	48.74	39.93	41.05	38.27	44.63	42.97	40.34	47.74	47.22	39.49	42.58	45.7	45.88	47.85	37.88	41.88	47.8	45.13	52.09	53.84	49.3	48.92	43.81	35.09	37.17	44.35	36.11	44.28	38.69	36.17	75.86	67.22	64.43	64.38	68.02	68.74	69.7	75.17	75.47	65.71	71.7	69.91	72	75.03	57.11	71.37	72.06
13618	13618	Ednrb	5.38	9.49	3.88	5.79	3.67	6.38	9.83	7.38	10.55	7.68	5.65	4.31	6.05	7.02	4.9	3.24	3.88	9.58	3.27	7.94	5.89	4.73	6.41	12.09	8.15	9.36	10.19	11.43	10.04	8.83	8.38	15.97	6.09	9.73	5.59	10.21	16.98	11.62	16.86	12.79	9.51	6.59	9.49	11	7.39	5.52	5.85
233908	233908	Fus	163.13	159.13	122.22	152.59	110.38	148.07	165.41	147.73	155.8	146.51	187.71	114.23	164.56	157.89	123.71	151.56	135.17	148.85	144.92	204.5	173.17	196.01	211.15	169.61	160.4	172.81	164.05	153.17	126.77	174.45	253.88	267.9	191.84	256.7	168.24	236.84	285.8	232.61	249.03	243.78	316.13	174.72	258.23	247.58	186.51	258.28	203.78
235345	235345	4833427G06Rik	0.22	0.22	0.1	0.07	0.08	0	0.34	0.22	0	0.14	0.43	0.04	0.15	0.19	0.05	0.11	0	0.14	0.08	0.16	0.23	0.08	0.37	0.16	0.15	0.16	0.29	0.14	0.31	0.28	0.34	0.37	0.16	0.12	0.12	0	0.59	0.34	0	0.24	0.72	0.06	0.23	0.3	0.08	0.18	0
22688	22688	Zfp26	3.42	3.33	2.76	2.57	2.61	3.03	3.44	3.12	3.03	2.73	3.26	2.84	3.48	3.49	3.09	4	2.74	2.84	3.36	4.43	3.99	3.78	4.54	4.15	3.91	3.8	4.11	2.35	3.37	3.43	5.33	5.61	4.33	4.32	3.98	4.85	5.94	4.91	4.84	4.55	5.5	4.34	5.47	5.47	4.66	6.81	4.13
26896	26896	Med14	5.6	5	4.71	4.31	4.86	5.65	6.46	5.85	5.39	5.09	5.18	4.26	5.14	5.95	4.59	5.73	4.67	4.48	4.66	6.41	5.29	5.38	7.27	5.99	5.74	7.17	5.66	4.51	5.64	6.38	8.71	8.42	7.39	7.25	7.41	9.03	11.16	9.21	8.61	8.47	8.72	6.52	8.06	9.32	6.93	9.77	7.05
89867	89867	Sec16b	3.68	6.4	6.41	7.3	5.23	4.7	5.95	4.35	4.11	6.79	7.64	3.93	4.91	3.95	10.61	7.08	4.09	3.43	4.74	7.3	7.55	7.11	6.4	6.05	5.36	5.89	6.24	5.39	4.41	6.09	5.72	10.77	10.06	12.28	7.97	7.52	10.28	6.85	6.57	11.29	12.87	6.01	7.71	6.19	16	12.07	6.17
75087	75087	4930505A04Rik	0	0	0.23	0	0.12	0.11	0	0	0	0.16	0.06	0	0.12	0.06	0	0.18	0.17	0.11	0.18	0.11	0.06	0	0	0.06	0	0	0.11	0.11	0.11	0.05	0	0	0.36	0	0.18	0.17	0	0	0	0.27	0.09	0	0.18	0.09	0	0.3	0.26
218699	218699	Pxk	16.69	25.3	16.2	22.28	15.73	16.05	26.55	17.52	20.05	20.56	26.29	11.81	17.89	16.67	16.12	14.18	11.64	14.87	13.12	29.5	19.63	20.46	17.47	23.44	16.39	33.21	17.89	23.11	22.58	23.73	25.97	42.59	25.43	37.47	23.98	25.67	45.87	27.58	32.04	34.21	44.28	18.06	28.08	26.14	24.31	24.17	17.55
115489413	115489413	LOC115489413	0.01	0	0	0.02	0	0	0.01	0	0.01	0.01	0.01	0.01	0.01	0	0	0	0	0	0	0.01	0	0.01	0.01	0.01	0	0	0	0	0	0.01	0.02	0	0	0.04	0	0	0.02	0	0.02	0.02	0.02	0.02	0.02	0	0	0	0
103161	103161	Apof	0.14	0.04	0.18	0	0.08	0.11	0.06	0.05	0.04	0.07	0.14	0.17	0.11	0.21	131.08	0.02	0.18	0.12	0.17	0.09	0.02	0.08	0.11	0.09	0	0.09	0.05	0.05	0.09	0.02	0.23	0.06	0.29	0	0.12	0.17	0.11	0.08	0.07	0.12	0.24	0.26	0.18	0.33	197.61	0.03	0.28
245877	245877	Map7d1	110.63	112.26	135.11	126.59	117.02	110.49	131.46	117.05	141.98	123.96	107.95	123.52	113.64	103.31	77.67	186.28	135.22	123.09	121.42	83.81	111.79	154.31	92.58	106.32	106.6	83.6	105.56	105.89	119.73	112.56	172.17	188.99	212.08	212.96	178.35	176.73	227.13	184.3	226.93	206.26	181.8	188.93	178.32	162	117.1	317.45	203.86
11977	11977	Atp7a	3.97	4.23	3.48	3.83	3.03	3.52	4.35	4.27	3.26	4.43	4.98	3.43	4.18	4.58	2.84	3.83	3.28	3.94	4.47	6.25	5.55	4.27	3.99	6.06	4.86	5.57	4.99	3.22	4.03	4.78	6.18	7.13	5.47	6.44	4.62	5.63	7.51	6.72	5.2	7.37	8.39	5.25	6.56	7.18	4.28	6.53	4.95
67988	67988	Tmx3	9.85	13.18	10.12	10.61	10	10.05	14.69	11.89	12.65	10.5	11.9	11.31	12.58	13.54	9.77	11.15	12.06	11.71	12.42	16.88	13.85	13.67	13.9	12.83	11.35	14.2	11.73	11.48	11.48	11.6	15.33	22.19	15.89	17.84	15.25	16.08	25.38	18.72	20.22	17.47	20.04	17.3	19.75	21.23	14.72	18.99	18.18
66395	66395	Ahnak	34.56	66.59	66.97	72.89	44.18	48.76	66.34	41.01	59.82	71.67	62.93	52.33	61.01	50.96	35.8	52.95	51.78	64.43	57.45	51.63	60.33	58.37	63.86	75.04	50.07	59.87	63.65	57.56	71.18	60.17	53.79	112.1	105.13	122.62	67.34	77.99	114.62	64.58	95.62	119.26	105.98	80.04	95.74	79.92	53.97	90.23	78.06
53381	53381	Prdx4	45.04	58.37	50.69	65.48	37.63	43.4	61.49	56.56	44.54	70.81	77.94	34.07	57.18	54.69	78.08	48.35	42.66	50.6	42.27	78.79	63.78	69.55	57.38	56.51	41.05	59.07	49.32	63.11	51.42	57.5	70.1	98.26	79.57	110.16	57.35	69.42	106.24	89.05	71.19	117.82	131.26	52.11	89.72	85.76	117.72	82.39	64.32
244329	244329	Mcph1	1.7	1.7	1.67	2.15	1.69	1.75	1.86	1.75	1.51	2.04	2.28	1.42	1.95	2.27	1.5	1.85	1.66	1.86	1.7	2.33	1.82	2.35	2.65	2.17	1.96	2.88	2.05	1.98	1.62	2.32	2.65	2.87	2.63	3.61	2.58	2.8	3.21	2.75	2.41	3.39	3.84	2.17	3.06	3.56	2.26	3.16	2.51
100862019	100862019	Gm21404	0	0	0	0	0	0	0	0	0	0	0	0	0	0.19	0	0	0	0	0	0.35	0	0.2	0.21	0	0	0.2	0	0	0	0.17	0	0	0	0	0	0	0	0	0	0	0	0	0	0.3	0	0	0
13417	13417	Dnah8	0.11	0.09	0.14	0.11	0.08	0.14	0.1	0.13	0.11	0.18	0.14	0.11	0.08	0.04	0.06	0.13	0.07	0.1	0.06	0.12	0.14	0.09	0.16	0.21	0.13	0.11	0.16	0.13	0.14	0.14	0.17	0.15	0.22	0.18	0.12	0.22	0.17	0.21	0.18	0.31	0.24	0.17	0.12	0.06	0.08	0.23	0.1
69583	69583	Tnfsf13	11.17	4.93	5.6	6.25	9.34	5.41	6.25	5.19	4.47	9.31	9.56	9.92	10.71	7.93	6.43	5.4	7.18	10.74	11.59	13.4	12.97	8.03	10.3	13.87	12.36	19	11.58	9.54	8.42	10.94	17.38	8.3	8.79	10.52	14.24	8.66	10.8	8.17	7.15	15.5	16.09	15.17	16.81	12.44	9.69	9.21	10.83
67246	67246	Resf1	14.74	10.58	8.41	10.7	12.02	11.19	11.89	12.18	7.97	8.28	11.58	8.56	18.15	18.23	11.18	12.39	11.54	11.57	14.32	27.73	16.33	18.29	24.97	17.95	14.38	24.63	13.7	11.19	9.49	19.96	22.95	17.81	13.21	18	18.32	17.9	20.54	19.17	12.74	13.78	19.49	13.1	28.48	28.58	16.85	21.12	17.39
20354	20354	Sema4d	18.31	15.01	16.43	14.87	18.96	16.49	8.83	13.73	8.82	15.79	35.36	23.13	26.77	16.94	11.29	21.33	20.28	24.46	18.58	20.84	21.82	15.24	23.8	27.43	22.61	21.92	24.88	14.55	15.65	24.02	28.5	25.27	25.8	25.02	28.9	26.38	15.26	21.63	14.09	26.27	59.54	35.39	42.01	26.56	17.02	36.35	30.57
70285	70285	Rpf1	23.09	17.33	14.86	17.6	18.68	19.12	19.52	20.35	20.67	16.07	18.95	15.28	18.26	21.65	17.93	17.22	16.53	17.08	16.69	27.28	17.71	21.63	24.99	17.97	18.95	27.86	16.96	19.46	17.34	22.41	35.94	29.17	23.32	29.62	28.46	30.58	33.73	32.05	33.04	26.73	31.92	23.37	28.65	33.95	27.03	29.35	24.92
218454	218454	Lhfpl2	14.81	27.41	24.1	29.41	19.25	16.8	17.88	15.52	11.59	27.21	36.62	25.33	35.81	23.98	19.28	24.9	26.93	34.4	32.62	26.1	39.39	25.97	29.65	44.65	29.15	26.11	37.37	28.51	28.47	37.71	23.06	46.15	37.83	49.48	29.34	26.87	30.89	24.43	18.52	45.27	61.66	38.74	56.2	37.61	29.07	42.44	40.6
241547	241547	Harbi1	4.35	4.41	2.95	3.81	3.8	4.34	3.75	3.77	3.47	4.21	3.32	3.99	3.74	4.36	4.27	5.48	4.14	3.38	3.84	4.12	4.24	4.96	4	3.74	4.69	4.62	3.73	4.09	4.02	4.01	6.77	7.42	4.64	6.42	5.79	6.95	6.48	5.94	5.55	7.01	5.6	6.1	5.87	6.84	6.44	9.34	6.24
210105	210105	Zfp719	2.26	2.27	1.28	1.79	1.41	1.98	2.85	1.84	2.01	1.98	1.78	1.52	1.73	2.21	1.53	1.68	1.51	1.36	1.59	2.39	1.89	2.05	2.06	2.28	2.18	2.47	2.29	1.85	1.97	2.23	3.51	3.82	2	3.01	2.16	3.17	4.92	2.9	3.22	3.29	2.99	2.32	2.72	3.47	2.31	2.86	2.27
105247180	105247180	Gm42323	0.04	0	0	0	0.09	0.06	0	0.02	0	0.07	0	0	0	0.02	0.07	0	0	0	0	0.07	0.05	0	0	0	0	0.14	0.06	0.08	0.06	0.08	0.07	0	0	0	0.14	0.1	0	0.03	0	0.12	0	0	0	0.04	0.1	0	0
330788	330788	Zfp866	5.36	4.76	4.52	4.26	4.83	5.3	7.34	4.84	5.66	4.39	4.96	4.17	4.73	5.49	4	5.69	4.44	4.24	5.06	6.15	4.78	5.55	5.72	5.61	6.05	6.11	6.1	3.86	4.25	5.21	8.34	8.01	7.1	7.17	7.36	8.48	12.69	7.62	9.05	7.3	8.36	6.37	7.43	8.61	6.04	9.7	6.7
102371	102371	Myzap	5.54	10.73	9.05	8.02	13.71	6.3	7.29	7.85	5.93	8.06	6.08	8.11	8.15	8.8	5.68	28.23	7.7	7.5	6.83	7.01	9.18	18.21	7.84	9.38	8.13	6.98	7.1	6.59	6.75	7.53	8.63	18.07	14.2	13.49	20.89	10.08	12.59	12.36	9.47	13.42	10.23	12.41	12.79	13.8	8.56	48.1	11.61
208846	208846	Daam1	6.05	8.75	5.06	6.58	5.32	7.16	13.77	7.39	13.92	6.56	5.34	4.62	6.36	6.99	7.82	5.53	4.79	7.48	4.73	9.17	6.89	6.86	7.6	9.61	6.48	13.34	6.43	6.11	9.55	8.55	9.41	14.73	7.94	11.08	8.1	11.45	23.79	11.63	22.25	10.92	9	7.07	9.97	10.96	11.79	9.43	7.22
114584	114584	Clic1	186.66	192.38	152.94	174.23	142.11	150.89	170	157.04	143.39	231.37	250.08	122.02	179.91	155.19	114.33	110.62	124.67	185.29	142.91	305.89	215.04	170.76	194.19	213.45	155.2	292.43	153.71	202.36	176.25	197.05	290.49	323.88	240.06	293.1	216.59	241.35	293.72	247.27	229.18	384.99	421.16	186.63	282.31	243.35	172.35	188.51	187.94
30938	30938	Fgd3	6.76	7.73	4.14	5.77	6.15	5.3	4.36	4.21	2.4	5.65	7.96	3.87	6.02	4.09	2.96	4.75	3.91	4.51	4.07	12.26	5.78	4.71	4.76	8.77	5.54	18.38	5.36	4.88	3.8	7.86	10.52	13.02	6.5	9.71	9.37	8.48	7.54	6.63	3.84	9.4	13.4	5.91	9.45	6.41	4.47	8.09	5.9
69286	69286	Glipr1l1	0	0	0	0	0	0	0	0	0.07	0	0	0	0	0	0	0	0	0	0	0	0	0	0	0	0	0	0	0	0	0	0	0	0	0	0	0	0	0	0.11	0	0	0	0	0	0	0	0
57782	57782	Rbak	5.34	4.43	3.65	4.16	4.22	4.51	6.88	4.65	5.13	3.4	4.7	3.6	5.26	5.55	3.92	5.06	3.98	3.15	5.07	8.93	5.62	6.84	6.04	5.46	6.17	5.93	4.85	3.62	3.79	5.07	8.3	7.45	5.72	7	6.43	7.22	11.89	7.32	8.2	5.66	7.92	5.5	8.26	8.71	5.91	8.62	6
27057	27057	Ncoa4	30.81	51.98	27.28	34.85	26.65	32.84	55.27	28.5	46.16	52.51	39.41	30.17	37.1	32.88	39.06	30.5	31.77	40.45	33.49	36.15	39.94	29.45	41.41	46.54	41.15	39.64	41.46	39.69	49.07	43.82	47.96	87.5	42.81	58.63	40.62	52.52	95.5	44.88	73.77	87.38	66.36	46.15	58.21	51.56	58.89	51.98	47.9
237558	237558	Myrfl	0.13	0.12	0.16	0.19	0.08	0.13	0.02	0.12	0.1	0.1	0.11	0.11	0.08	0.11	0.04	0.31	0.19	0.05	0.11	0	0.01	0.25	0.08	0.13	0.14	0.04	0.1	0.12	0.09	0.1	0.2	0.2	0.25	0.32	0.13	0.2	0.03	0.18	0.17	0.17	0.19	0.17	0.13	0.17	0.06	0.53	0.28
12842	12842	Col1a1	1264	1940.75	2136.01	2985.88	1258.86	2074.8	1591.77	1301.45	926.66	3572.01	3822.75	963.13	1506.89	1007.95	1056.58	2437.54	1537	1755.56	1187.83	1901.04	2106.97	2129.31	1625.45	2975.69	1607.11	2189.43	2348.49	1787.57	2279.65	2534.15	1967.12	3267.27	3352.82	5023	1918.63	3318.65	2750.23	2049.2	1481.12	5943.69	6437.84	1473.14	2364.64	1580.52	1592.87	4153.92	2317.12
665858	665858	Gm7827	0.04	0.03	0.04	0	0	0.07	0	0.01	0.08	0.03	0.03	0.06	0	0.07	0	0.02	0.14	0	0.11	0.03	0	0	0.03	0.01	0.07	0.07	0.07	0.1	0.07	0.03	0.05	0.06	0.06	0	0	0.12	0	0.02	0.12	0.05	0.06	0.08	0	0.11	0	0.03	0.21
71984	71984	Sars2	10.42	7.02	8.84	7.67	10.31	8.4	10.23	10.13	12.38	6.83	8.55	9.71	9.78	9.87	9.55	8.75	9.96	8.37	9.84	9.98	9.52	8.69	9.05	6.94	8.03	7.35	8.67	8.58	7.28	7.26	16.22	11.82	13.88	12.9	15.71	13.44	17.67	15.95	19.78	11.37	14.4	14.85	15.34	15.47	14.39	14.92	15.01
16673	16673	Krt36	0.05	0	0.05	0.03	0.14	0.03	0	0.03	0.03	0	0.06	0	0	0	0.03	0.06	0.03	0.03	0.03	0.05	0	0	0.05	0	0.02	0.03	0	0.08	0.11	0.04	0.08	0	0.08	0.04	0.21	0.04	0	0.04	0.05	0	0.1	0	0	0	0.04	0.09	0.04
68375	68375	Ndufa8	206.98	179.3	233.6	188.91	274.77	227.88	173.94	234.48	260.95	198.97	180.79	267.41	214.73	236.4	210.07	206.62	277.76	226.22	258.9	138.6	211.35	204.95	203.89	148.77	205.41	126.92	190.57	222.1	193.15	165.82	322.11	301.85	366.67	317.8	418.78	364.5	300.53	369.2	417.09	331.07	304.46	409	336.95	370.69	316.69	352.1	418.74
11772	11772	Ap2a2	30.92	29.76	33.7	35.85	30.77	32.17	31.69	30.3	33.56	43.85	37.11	27.51	28.92	25.89	29.37	35.89	30.31	32.8	28.77	39.07	32.2	34.93	27.35	35.74	31.3	34.79	30.23	36.09	30.83	29.81	48.13	50.1	52.9	60.31	46.89	51.45	54.75	47.71	53.65	72.96	62.5	42.07	45.38	40.6	44.28	61.16	45.69
30960	30960	Vapa	79.55	98.39	83.42	87.07	79.23	77.97	78.75	80.76	85.15	77.14	80.42	89.58	85.41	81.69	71.74	92.09	84	84.82	90.6	79.45	86.77	89.48	80.74	66.24	68.04	67.09	69.61	93.92	83.63	87.2	123.8	165.64	130.94	146.47	120.75	124.71	136.06	127.17	136.1	128.36	135.43	137.02	134.02	128.09	108.15	156.94	126.63
245109	245109	Zscan4c	0	0	0	0	0	0	0	0	0	0	0	0	0	0	0	0	0	0	0	0.04	0	0	0	0.02	0	0	0	0	0.02	0	0	0	0	0	0	0	0	0	0	0	0	0	0	0	0	0	0
320007	320007	Sidt1	0.19	0.02	0.05	0.08	0.28	0.24	0.69	0.06	0.45	0.06	0.11	0.09	0.13	0.25	0.11	0.13	0.15	0.06	0.08	0.13	0.02	0.28	0.44	0.23	0.15	0.6	0.22	0.11	0.08	0.18	0.3	0.03	0.07	0.14	0.43	0.38	1.18	0.1	0.72	0.11	0.18	0.14	0.2	0.39	0.16	0.22	0.22
224997	224997	Dlgap1	1.56	0.08	0.09	0.06	0.42	0.81	0.85	0.5	0.99	0.08	0.02	0.33	1.05	1.24	0.51	0.07	0.29	0.69	0.97	1.69	0.73	0.59	0.88	0.5	0.99	0.96	1	0.24	0.22	0.91	2.43	0.13	0.14	0.11	0.64	1.3	1.46	0.79	1.59	0.13	0.04	0.51	1.64	1.94	0.77	0.12	0.44
193736	193736	Zbtb12	9.94	5.76	5.64	5.56	9.42	9.3	6.71	9.69	6.58	6.18	7.65	6.53	7.29	9.8	6.39	8.08	6.41	6.39	8.52	11.86	7.12	8.83	8.64	7.52	8.71	12.4	8.27	5.23	4.79	7.98	15.46	9.7	8.85	9.35	14.35	14.87	11.6	15.26	10.51	10.29	12.89	9.99	11.44	15.36	9.63	13.77	9.66
11482	11482	Acvrl1	16.08	13.69	13.89	14.03	12.56	15.38	20.8	22.1	18.72	21.13	22.16	13.65	20.46	19.72	12.41	14.15	11.37	17.29	15.13	26.73	21.64	20.88	18.95	23.78	16.55	19.69	20.26	18.67	18.75	17.47	25.02	23.04	21.8	23.61	19.14	24.6	35.93	34.8	29.92	35.15	37.32	20.87	32.11	30.91	18.71	24.11	17.14
226245	226245	Plekhs1	16.66	0.05	0.18	0.3	9.74	10.01	1.39	5.4	3.53	0.06	0.24	0.46	6.3	10.63	2.02	0.16	2.45	1.84	6.56	21.79	3.35	6.23	7.7	4.07	6.91	26.59	5.17	0.35	1.03	4.65	25.92	0.09	0.28	0.5	14.84	16.02	2.4	8.51	5.65	0.11	0.4	0.71	9.89	16.67	3.05	0.27	3.69
20899	20899	Stra8	0.06	0	0.03	0	0.07	0.03	0	0	0.04	0	0	0	0	0	0	0	0	0.03	0	0	0	0	0	0	0.03	0	0	0.03	0	0	0.1	0	0.05	0	0.1	0.05	0	0	0.06	0	0	0	0	0	0	0	0
12154	12154	Bmp10	0	0	0	0	0	0.03	0	0	0	0	0	0	0	0	0.07	0	0	0	0	0	0	0	0	0	0	0	0	0	0	0	0	0	0	0	0	0.05	0	0	0	0	0	0	0	0	0.11	0	0
67981	67981	Hormad1	0	0	0.03	0	0	0	0	0	0.07	0	0	0.03	0	0	0	0.03	0	0	0	0	0	0	0.03	0	0	0.03	0	0	0	0.03	0	0	0.04	0	0	0	0	0	0.12	0	0	0.04	0	0	0	0.06	0
105594	105594	Cphx1	0	0.08	0	0	0	0	0.06	0	0	0	0	0	0	0.06	0.63	0	0	0	0	0.03	0	0	0	0	0	0	0	0	0.03	0	0	0.14	0	0	0	0	0.11	0	0	0	0	0	0	0.09	0.95	0	0
382062	382062	AB124611	14.55	10.43	14.52	18.06	13.78	11.23	12.91	14.84	11.89	20.2	26.2	16.19	17.97	10.99	11.12	10.34	16.47	23.31	17	20.44	24.51	15.09	11.93	25.19	18.36	14.76	17.44	21.46	12.41	17.33	22.64	17.56	22.79	30.38	21	17.97	22.3	23.36	19	33.61	44.13	24.77	28.2	17.23	16.76	17.62	24.83
13138	13138	Dag1	50.9	81.37	61.82	74.37	66.34	59.53	42.58	55.73	48.37	63.14	46.88	65.31	47.28	46.85	40.13	85.79	60.4	53.49	47.11	37.92	41.5	62.59	60.39	54.82	62.07	51.25	71.66	57.7	67.16	66.34	79.22	136.99	97.03	125.12	101.12	95.22	73.57	87.75	77.31	105.07	78.95	99.89	74.19	73.46	60.49	146.2	91.06
269033	269033	4930503L19Rik	3.26	7.78	5.9	7.61	3.52	3.27	7.53	5.25	5.27	6.21	7.94	4.54	6.28	5.35	4.38	5.25	4	4.61	5.69	5.12	8.04	6.33	6.77	8.37	5.78	5.01	5.98	6.31	6.98	6.33	5.07	13.09	9.26	12.79	5.37	5.23	13.01	8.26	8.42	10.34	13.37	6.95	9.85	8.38	6.61	8.95	6.04
20203	20203	S100b	0.51	0.86	1.54	0.6	0.39	1.29	3.17	1.37	4.49	0.62	0.65	1.2	0.53	0.7	1.01	0.5	0.89	1.53	0.88	0.19	0.45	0.54	0.57	0.73	0.32	0.48	0.58	0.86	1.2	0.51	0.79	1.45	2.42	1	0.6	2.06	5.47	2.16	7.17	1.04	1.1	1.84	0.83	1.1	1.52	0.85	1.35
229937	229937	Znhit6	11.8	12.05	10.64	11.27	10.91	10.63	10.7	13.24	11.11	12.35	10.49	10.32	14.46	14.75	11.57	15.05	10.06	11.1	12.72	13.39	11.09	15.93	17.92	9.73	10.27	12.87	14.5	14.24	11.57	15.97	18.36	20.28	16.71	18.96	16.62	17	18.49	20.84	17.76	20.55	17.67	15.79	22.69	23.13	17.44	25.66	15.16
329828	329828	Myorg	15.18	12.95	30.99	19.6	26.47	19.01	6.8	14.62	12.8	17.98	9.39	22.61	14.22	12.96	14.43	39.86	25.36	16.65	16.08	0.88	11.53	25.53	11.1	7.94	16.28	3.55	16.02	10.29	14.08	9.09	23.62	21.81	48.65	32.97	40.34	30.4	11.75	23.02	20.46	29.92	15.81	34.58	22.32	20.32	21.76	67.93	38.23
12509	12509	Cd59a	25.78	27.12	19.58	17.97	20.58	42.95	189.71	24.04	126.62	16.3	18.29	19.36	17.23	24.01	51.3	13.29	20.47	43.07	26.3	27.99	22.04	21.63	23.45	55.34	34.67	59.33	29.06	34.15	72.5	29.63	40.11	45.65	30.73	30.23	31.37	68.69	327.77	37.85	202.38	27.11	30.81	29.61	27.03	37.65	77.33	22.65	30.86
319765	319765	Igf2bp2	8.88	7.36	5.47	6.62	6.75	6.04	7.17	8.73	3.88	6.17	10	5.97	7.27	7.3	4.8	3.54	5.15	7.49	8.65	17.73	8.79	5.21	8.26	9.79	7.22	13.02	7	8.6	8.33	9.22	13.82	12.39	8.59	11.14	10.29	9.66	12.39	13.74	6.2	10.27	16.83	9.14	11.4	11.45	7.24	6.04	7.76
19703	19703	Renbp	33.44	31.06	19.77	21.94	22.64	23.51	31.4	31.65	29.23	27.68	30.86	32.75	40.68	32.6	22.4	20.72	28.07	38.21	39.41	51.36	46.13	36.06	31.72	37.54	34.76	30.63	28.9	36.18	28.5	33.83	52.04	52.29	31.04	36.9	34.51	37.6	54.26	49.83	46.72	46.05	51.98	50.09	63.83	51.12	33.78	35.31	42.32
382105	382105	Fbxw15	0	0	0	0	0	0.24	1.41	0	1.05	0	0	0	0	0	0.17	0	0	0.11	0	0.06	0	0	0	0.09	0	0.03	0	0	0.09	0	0	0	0	0	0	0.39	2.43	0	1.67	0	0	0	0	0	0.25	0	0
77519	77519	Zfp266	8.03	7.61	4.89	6.03	5.79	7.02	9.19	8.36	6.33	5.3	6.78	5.6	6.79	8.46	5.85	6.64	5.96	5.62	7.34	11.98	8.66	7.96	8.79	8.14	7.98	10.43	8.54	5.98	6.11	7.45	12.49	12.81	7.67	10.14	8.82	11.23	15.88	13.17	10.12	8.81	11.42	8.57	10.66	13.27	8.82	11.31	8.98
76408	76408	Abcc3	6.71	5.2	4.48	5.42	3.48	3.63	6.25	5.05	3.66	7.83	11.27	3.22	5.15	4.72	21.62	4.44	3.31	4.93	4.49	4.95	4.94	4.93	5.2	8.07	6.14	4.79	4.66	6.52	5.64	6.03	10.44	8.76	7.04	9.12	5.3	5.81	10.8	7.96	5.85	13.03	18.97	4.92	8.08	7.41	32.59	7.57	4.99
19285	19285	Cavin1	125.92	147.25	143.05	148.86	126.33	159.32	268.58	152.88	249.63	201.25	122.44	114.26	151.85	143.96	118.3	114.33	123.62	162.32	129.52	137.77	150.18	161.98	152.32	138.02	121.11	144.48	125.79	130.33	186.67	116.38	195.97	247.9	224.55	250.41	192.54	254.83	464.05	240.72	399	334.87	206.2	174.76	238.29	225.73	178.35	194.83	186.36
76002	76002	Ms4a18	0	0	0	0.04	0.03	0	0	0	0	0	0	0	0	0.04	0	0	0	0	0	0	0	0	0.35	0	0	0	0	0.13	0	0.07	0	0	0	0.06	0.05	0	0	0	0	0	0	0	0	0.05	0	0	0
21930	21930	Tnfaip6	2.65	10.18	20.53	32.12	3.29	5.3	10.09	5.26	3.93	23.04	11.95	4.73	7.42	3.32	2.64	6.33	7.22	7.18	5.42	5.79	9.19	7.89	4.81	11.34	4.88	8.72	13.57	15.4	15.4	11.03	4.12	17.13	32.22	54.03	5.02	8.48	17.43	8.28	6.27	38.34	20.12	7.23	11.65	5.21	3.99	10.78	10.88
654801	654801	Zfp784	2.7	2.08	2.31	2	3.01	2.66	2.07	2.84	4.03	2.45	2.01	2.62	2.49	2.78	1.78	3.98	2.88	2.11	2.54	2.81	2.91	3.04	2.89	2.36	2.97	2.23	2.36	1.98	1.77	2.24	4.2	3.51	3.62	3.36	4.58	4.26	3.58	4.47	6.45	4.07	3.39	4	3.91	4.37	2.68	6.78	4.34
192236	192236	Hps1	8.57	9.37	6.37	7.73	6.72	7.75	8.44	6.11	6.38	8.46	11.06	6.01	6.74	6.18	5.68	7.2	5.17	7.39	6.65	11.59	9.11	8.46	7.75	8.93	7.74	11.02	7.3	9.41	7.21	8.04	13.34	15.77	9.99	13.01	10.25	12.4	14.58	9.62	10.19	14.08	18.63	9.2	10.58	9.69	8.57	12.27	7.79
12419	12419	Cbx5	14.3	18.49	19.68	17.46	16.28	14.95	17.7	16.56	12.85	20.7	17.49	12.34	15.81	14.67	12.81	25.69	16.54	16.62	12.97	15.81	14.17	25.79	28.36	17.93	19.46	24.28	21.91	12.07	16.52	24.65	22.26	31.13	30.89	29.38	24.81	23.92	30.57	26.08	20.53	34.44	29.45	18.87	24.81	23	19.31	43.78	24.93
66060	66060	Cystm1	115.78	121.98	147.95	121.79	167.72	137.47	71.26	134.8	124.5	86.07	67.66	173.83	104.58	125.85	85.41	97.14	158.61	124.68	138.58	43.41	99.26	75.58	82.05	56.16	96.36	62.55	80.72	139.2	107.37	94.91	180.18	205.35	232.23	204.88	255.62	219.89	123.13	212.26	198.99	143.22	113.94	265.89	164.11	197.33	128.76	165.53	239.11
268709	268709	Fam107a	0.47	0.64	0.49	0.79	0.23	0.7	2.54	0.73	2.43	0.27	0.34	0.39	0.65	0.33	0.52	0.43	0.2	0.61	0.41	0.38	0.51	0.68	0.55	1.06	0.38	0.64	0.64	0.54	0.69	0.58	0.74	1.07	0.77	1.32	0.35	1.11	4.39	1.16	3.89	0.45	0.57	0.6	1.01	0.52	0.79	0.73	0.31
67157	67157	2610301B20Rik	6.51	7.89	4.44	5.39	5.43	6.03	10.48	6.15	9.31	5.61	6.19	4.86	6.24	6.61	4.92	6.69	5.63	5.57	6.08	7.43	6.33	7.12	6.78	5.93	6.55	6.33	5.9	5.48	6.01	6.36	10.12	13.28	6.97	9.06	8.27	9.65	18.1	9.68	14.87	9.34	10.42	7.44	9.78	10.37	7.41	11.41	8.49
434756	434756	Akap14	0	0	0	0	0	0	0	0	0	0	0	0	0	0	0	0	0	0	0	0	0	0	0	0.02	0.02	0	0	0	0	0	0	0	0	0	0	0	0	0	0	0	0	0	0	0	0	0	0
13706	13706	Cela2a	0	0	0	0	0	0	0	0	0	0	0	0	0	0	0.8	0	0	0	0	0	0	0	0	0	0	0	0	0	0	0	0	0	0	0	0	0	0	0	0	0	0	0	0	0	1.21	0	0
268345	268345	Kcnc2	0.45	0.16	0.18	0.13	0.63	0.41	0.87	0.44	1.11	0.09	0.12	0.12	0.14	0.35	0.25	0.19	0.14	0.18	0.15	0.97	0.34	0.24	0.38	0.28	0.16	1.14	0.2	0.12	0.24	0.22	0.7	0.27	0.29	0.23	0.96	0.65	1.51	0.7	1.77	0.16	0.21	0.19	0.22	0.54	0.37	0.32	0.2
110599566	110599566	Eef1akmt4	8.8	10.57	9.39	9.38	9.11	8.27	7.76	8.82	7.13	12.06	14.19	8.72	8	8.46	6.73	14.28	8.2	8.15	7.91	12.1	9.11	10.89	8.83	9.79	8.58	9.65	10.74	10.17	7.16	9.45	13.69	17.79	14.74	15.79	13.89	13.23	13.41	13.89	11.4	20.07	23.9	13.33	12.55	13.27	10.15	24.33	12.36
14800	14800	Gria2	0.07	0	0.02	0.01	0.02	0.13	0.59	0.01	0.55	0.01	0.01	0	0.02	0.02	0.07	0	0.03	0.15	0.19	0.05	0	0	0.07	0.08	0.08	0.05	0.09	0.03	0.08	0.05	0.11	0.01	0.04	0.02	0.04	0.2	1.02	0.01	0.88	0.02	0.01	0.01	0.03	0.03	0.11	0	0.04
12412	12412	Cbx1	49.18	41.05	38.81	37.11	39.56	39.12	47.76	44.26	37.99	40.46	46.62	36.08	44.43	45.28	36.03	39.56	33.54	37.77	40.91	58.15	46.76	46.77	49.42	45.13	41.57	56.69	41.47	39.84	43.74	44.72	76.53	69.11	60.91	62.43	60.29	62.57	82.51	69.7	60.72	67.32	78.52	55.19	69.72	71	54.31	67.41	50.57
78913	78913	Ltn1	6.72	7.5	6.51	7.2	6.89	7.03	7.88	7.32	7.44	6.48	7.48	7.24	7.47	7.46	6.43	8.69	6.91	6.44	6.8	7.25	7.05	7.21	8.36	7.64	7.88	7.72	8.45	6.99	6.98	7.37	10.46	12.62	10.22	12.11	10.5	11.25	13.62	11.53	11.89	10.78	12.6	11.08	11.73	11.7	9.69	14.8	10.41
69632	69632	Arhgef12	13.4	15.5	11.84	14.95	11.18	13.53	22.19	14.55	23.7	17.97	12.67	11.05	13.05	13.95	13.68	15.15	10.03	11.29	11.28	16.47	13.13	13.8	15.6	17.55	15.86	21.08	15.79	11.52	14.93	15.27	20.85	26.09	18.59	25.15	17.04	21.64	38.34	22.92	37.88	29.9	21.34	16.9	20.48	21.88	20.63	25.82	15.12
19417	19417	Rasgrf1	0.06	0.01	0.01	0.04	0.04	0.03	0.1	0.01	0.12	0.05	0.02	0.04	0.31	0.17	0.04	0.02	0.05	0.13	0.09	0.12	0.25	0.04	0.47	0.05	0.12	0.05	0.22	0.06	0.03	0.18	0.09	0.02	0.01	0.06	0.06	0.04	0.17	0.01	0.19	0.08	0.03	0.06	0.48	0.27	0.06	0.03	0.07
103967	103967	Dnm3	0.87	1.07	0.81	0.79	0.68	0.95	2.08	0.97	2.49	0.85	0.93	0.89	1.21	0.89	0.88	1.15	0.76	1.07	0.77	0.82	0.92	1.33	1.59	1.72	1.03	1.02	1.07	1.06	1.09	1.29	1.35	1.8	1.27	1.32	1.04	1.52	3.6	1.52	3.99	1.42	1.57	1.35	1.9	1.39	1.33	1.96	1.15
70615	70615	Ankrd24	4.61	3.47	3	3.25	3.89	3.79	7.09	4.08	6.72	3.03	2.87	3.55	5.07	4.99	3.84	3.19	3.5	3.15	4.62	4.16	4.99	4.63	4.53	3.46	4.65	3.51	4.54	3.36	3.43	3.24	7.18	5.84	4.71	5.46	5.93	6.07	12.25	6.43	10.74	5.05	4.84	5.43	7.96	7.82	5.79	5.44	5.27
73389	73389	Hbp1	42.19	47.01	35.14	36.36	38.27	38.47	35.55	39.53	36.07	38.86	37.46	37.7	37.89	40.15	37.36	48.36	34.76	36.56	35.41	46.36	40.86	44.69	34.18	41.78	44.7	48	36.1	42.53	34.56	40.16	65.66	79.14	55.15	61.16	58.33	61.53	61.42	62.24	57.65	64.67	63.09	57.67	59.46	62.96	56.32	82.41	52.4
670593	670593	Gm9495	0.03	0.03	0.03	0.05	0.06	0.07	0.03	0.01	0.15	0	0.03	0.06	0.01	0.04	0.02	0.14	0.13	0.08	0.05	0.03	0.06	0.09	0.03	0.01	0.04	0.04	0.03	0.07	0.01	0.03	0.04	0.05	0.05	0.09	0.09	0.11	0.06	0.02	0.24	0	0.05	0.09	0.02	0.07	0.04	0.25	0.2
243374	243374	Gimap8	3.94	4.11	3.54	3.48	3.09	4.02	4.49	5.39	4.95	3.32	3.83	4.68	5.84	6.26	4.29	4.15	3.94	3.4	5.04	6.09	5.73	6.66	6.05	6.62	4.91	4.38	5.46	4.38	3.79	5.06	6.13	6.92	5.56	5.86	4.71	6.44	7.76	8.48	7.91	5.53	6.45	7.17	9.16	9.82	6.46	7.07	5.94
19208	19208	Ptcra	0	0.04	0	0.07	0.05	0	0	0.04	0	0.15	0	0.07	0.04	0	0.04	0.04	0.04	0.11	0	0.03	0.09	0.08	0.04	0	0	0.04	0	0.04	0.07	0	0	0.06	0	0.12	0.08	0	0	0.06	0	0.24	0	0.1	0.06	0	0.06	0.06	0.06
77976	77976	Nuak1	10.48	9.33	8.76	7.58	6.62	8.61	5.5	11.64	7.36	9.54	10.85	7.04	8.86	8.1	5.51	10.47	7.87	7.58	8.17	13.96	8.08	10.88	9.97	9.29	8.75	9.12	7.27	7.23	7.16	8.7	16.3	15.71	13.74	12.75	10.08	13.77	9.5	18.33	11.76	15.88	18.27	10.76	13.9	12.7	8.31	17.85	11.86
71240	71240	Osbpl7	5.26	3.43	3.08	3.62	5.1	4.19	5.39	4.47	5.63	3.43	4.04	3.38	4.36	4.46	3.4	3.74	3.17	3.3	4.36	7.37	4.95	4.84	4.07	4.46	4.04	6.52	4.3	3.52	3.36	4.58	8.19	5.78	4.83	6.1	7.77	6.71	9.32	7.03	9	5.7	6.81	5.16	6.85	7	5.12	6.37	4.77
665622	665622	Hist1h2br	0.59	0.58	0.26	0.77	0.18	0.65	0.58	0.34	0.79	0.65	0.42	0.31	0.5	0.36	0.39	0.26	0.27	0.26	0.23	1.41	0.77	0.81	0.45	0.97	0.43	0.92	0.36	0.94	0.75	0.79	0.93	0.98	0.41	1.29	0.28	1.04	1.01	0.53	1.27	1.08	0.71	0.47	0.79	0.56	0.59	0.44	0.41
237868	237868	Sarm1	0.26	0.16	0.09	0.13	0.14	0.3	0.65	0.2	0.62	0.13	0.17	0.21	0.27	0.32	0.22	0.26	0.14	0.17	0.21	0.2	0.17	0.14	0.32	0.28	0.39	0.26	0.36	0.23	0.2	0.15	0.4	0.27	0.14	0.23	0.21	0.48	1.12	0.32	0.99	0.21	0.28	0.31	0.42	0.51	0.32	0.44	0.2
73747	73747	Shld1	8.96	4.95	5.92	6.31	6.48	6.29	8.4	6	9.82	6.38	5.71	7.67	7.03	6.47	6	4.81	6.53	6.8	8.13	7.65	7.53	5.82	5.94	4.78	5.85	5.84	6.31	6.89	6.13	6.11	13.95	8.33	9.3	10.62	9.88	10.06	14.52	9.45	15.69	10.61	9.62	11.73	11.04	10.15	9.05	8.19	9.85
331524	331524	Xkrx	0.52	0.34	0.36	0.23	0.64	0.45	0.34	0.3	0.54	0.24	0.49	0.35	0.19	0.27	0.38	0.45	0.51	0.23	0.38	0.48	0.48	0.33	0.4	0.38	0.34	0.41	0.3	0.3	0.25	0.29	0.81	0.57	0.57	0.38	0.97	0.72	0.59	0.47	0.86	0.41	0.83	0.54	0.29	0.42	0.57	0.76	0.77
20230	20230	Satb1	11.43	9.12	9.36	7.76	11.65	10.98	9.84	14.33	11.19	6.16	6.23	16.32	11.45	14.55	8.1	8.11	13.95	12.9	14.16	6.71	10.63	8.6	9.1	8.95	12.68	5.17	9.83	7	8.96	8.06	17.78	15.35	14.69	13.06	17.76	17.57	17	22.56	17.88	10.25	10.49	24.96	17.96	22.82	12.21	13.82	21.02
171530	171530	Ucn2	3.89	1.63	0.97	1.03	1.79	2.72	3.46	2.74	2.57	0.79	0.74	1.94	4.87	2.49	1.95	1.47	1.58	1.64	4.56	8.2	4.77	4.75	3.71	2.18	1.98	3.59	3.43	1.18	1.21	2.54	6.05	2.75	1.53	1.73	2.73	4.35	5.98	4.31	4.1	1.31	1.24	2.97	7.65	3.9	2.94	2.51	2.38
213696	213696	Duoxa1	0.03	0.51	1.22	1.62	0.31	0.47	0.36	0.23	0.22	1.32	1.18	0.22	0.1	0.09	0.13	1	0.65	0.2	0.17	0.1	0.29	1.19	1.93	0.59	0.52	0.16	0.61	0.6	0.41	0.39	0.05	0.87	1.91	2.73	0.47	0.75	0.62	0.36	0.36	2.2	1.99	0.33	0.16	0.15	0.19	1.71	0.98
18036	18036	Nfkbib	22.76	19.66	21.13	22.66	21.34	21.77	17.71	19.68	18.13	22.16	20.2	21.37	21.79	20.11	19.5	25.69	22.85	21.83	20.68	21.32	20.17	22.52	17.23	19.85	20.99	21.71	19.48	25.15	19.82	23.47	35.42	33.1	33.16	38.12	32.53	34.82	30.6	30.99	28.98	36.87	34.01	32.69	34.19	31.54	29.4	43.79	34.45
19127	19127	Prop1	0	0	0	0	0	0	0.05	0	0	0.04	0	0	0	0	0	0	0	0	0.05	0	0	0	0	0	0.04	0	0.04	0	0.04	0	0	0	0	0	0	0	0.09	0	0	0.07	0	0	0	0	0	0	0
57342	57342	Parva	43.88	40.91	23.69	32.32	24.08	39.1	86.37	45.7	62.04	36.34	41.35	20.23	45.62	50.35	37.77	23.16	23.78	37.51	28.9	62.47	40.9	39.69	58.38	54.75	44.84	61.97	37.3	34.84	52.05	38.65	68.29	68.87	37.18	54.37	36.69	62.55	149.22	71.95	99.16	60.46	69.63	30.95	71.59	78.95	56.94	39.47	35.85
27886	27886	Ess2	9.52	7.37	6.19	6.95	7.82	8.24	10.03	8.25	9.52	8.13	7.92	6.4	8.08	7.28	6.4	8.56	5.38	5.63	7.36	11.66	10	9.21	9.66	8.42	8.36	9.63	7.8	7.89	6.83	7.38	14.82	12.4	9.72	11.69	11.92	13.18	17.32	13	15.21	13.52	13.33	9.79	12.68	11.42	9.65	14.58	8.12
16328	16328	Cep250	9.36	8.36	6.49	8.14	5.87	6.74	9.98	8.4	7.99	8.52	11.25	5.51	8.71	8.72	6	7.49	5.55	5.83	8.02	13.96	9.89	10.13	8.76	10.73	9.2	10.02	9.08	7.04	6.84	8.51	14.56	14.08	10.19	13.7	8.95	10.79	17.24	13.22	12.78	14.18	18.95	8.43	13.66	13.68	9.05	12.76	8.37
677296	677296	Fcrl6	0.05	0.32	0	0	0	0	0	0	0	0.02	0	0	0	0	0	0	0.05	0	0.03	0	0.02	0	0	0.02	0	0	0.02	0	0.07	0.32	0.07	0.54	0	0	0	0	0	0	0	0.04	0	0	0	0	0	0	0.07
399591	399591	Tmsb15l	7.95	1.38	1.42	1.07	2.95	4.57	4.56	2.2	2.18	1.42	1.35	1.18	2.68	2.75	2.1	1.39	1.58	1.78	1.66	5.17	2.13	2.13	1.86	2.61	2.96	11.81	2.02	1.22	2.15	1.69	12.37	2.33	2.24	1.79	4.49	7.31	7.88	3.46	3.48	2.36	2.28	1.8	4.21	4.31	3.16	2.37	2.38
170483	170483	Grin3b	0.09	0.03	0.05	0.05	0.04	0.1	0.07	0.02	0.09	0.04	0.08	0.04	0.12	0.04	0.03	0.09	0.05	0.03	0.05	0.06	0.05	0.09	0.05	0.03	0.02	0.02	0.04	0.02	0.12	0.05	0.14	0.04	0.08	0.08	0.06	0.15	0.12	0.04	0.15	0.06	0.13	0.06	0.18	0.06	0.05	0.15	0.07
13855	13855	Epn2	13.56	21.57	9.88	11.76	9.57	12.12	20.92	14.6	18.07	10.69	9.81	9.03	11.43	12.64	9.52	10.43	8.47	11.79	10.91	18.34	12.14	14.15	11.42	12.92	12.43	16.08	10.48	12.8	14.78	13.39	21.1	36.32	15.52	19.78	14.58	19.38	36.14	22.99	28.87	17.78	16.53	13.81	17.94	19.82	14.35	17.77	12.76
20397	20397	Sgpl1	44.65	45.22	28.87	37.31	28.75	32.05	34.87	38.9	26.77	38.97	58.94	40.35	48.4	41.08	34.41	32.84	36.34	47.36	47.75	74.54	57.98	42.24	40.54	60.55	51.15	53.13	44.42	43.99	39.87	48.6	69.48	76.12	45.31	62.77	43.82	51.26	60.25	61.26	42.8	64.84	99.26	61.71	75.95	64.42	51.88	55.97	54.78
68205	68205	Urm1	18.51	15.2	14.76	14.31	16.08	15.44	17.56	16.49	17.65	15.21	17.1	11.98	14.5	15.26	12.22	13.71	14.39	15.71	14.36	21.17	15.18	17.02	13.86	14.15	15.33	17.01	13.19	18.27	13.74	15.69	28.8	25.6	23.17	24.08	24.5	24.7	30.35	25.96	28.21	25.31	28.8	18.33	22.75	23.93	18.42	23.36	21.69
50931	50931	Il27ra	1.49	1.31	1.81	2.06	1.07	1.96	1.6	1.57	1.28	2.7	2.05	2.91	2.67	1.45	1.53	1.63	1.77	2.46	1.97	2.31	2.71	1.55	1.96	3.91	2.79	1.95	3.1	3.39	1.85	2.8	2.31	2.2	2.84	3.46	1.63	3.13	2.77	2.47	2.05	4.49	3.45	4.44	4.18	2.27	2.3	2.77	2.66
243725	243725	Ppp1r9a	2.31	0.78	0.73	0.88	1.53	1.61	3.26	1.45	3.37	0.82	0.62	0.96	1.4	2.04	1.62	1.76	1.25	0.99	1.49	2.89	1.44	1.86	1.76	1.5	2.06	2.89	1.48	0.79	1.06	1.29	3.6	1.31	1.14	1.47	2.34	2.57	5.64	2.28	5.38	1.36	1.04	1.47	2.19	3.19	2.44	3.01	1.89
69709	69709	Ptrhd1	2.25	1.98	1.78	1.76	2.16	2.08	2.37	2.21	2.43	2.19	1.96	2.07	2.11	2.03	1.69	2.13	2.09	1.9	2.04	2.37	2.41	2.16	2.26	1.97	2.23	1.93	1.77	2.15	2.04	1.99	3.5	3.34	2.79	2.96	3.29	3.33	4.1	3.47	3.89	3.64	3.31	3.17	3.32	3.18	2.55	3.64	3.15
75599	75599	Pcdh1	7.22	11.28	7.17	6.84	5.54	7.6	10.48	12.49	10.25	10.59	9.99	6.61	8.61	9.49	15.33	10.5	4.88	7.37	6.01	13.66	10.51	11.59	9.81	12.39	7.44	12.21	8.99	8.01	9.37	9.99	11.23	18.99	11.26	11.51	8.45	12.15	18.1	19.67	16.38	17.62	16.82	10.11	13.51	14.88	23.11	17.89	7.35
15564	15564	Htr5b	0	0.11	0	0.1	0	0.06	0	0.02	0	0.14	0.02	0.02	0	0	0	0.04	0.04	0.04	0	0	0	0.05	0	0.06	0.02	0.02	0	0	0.11	0	0	0.18	0	0.17	0	0.1	0	0.03	0	0.24	0.03	0.03	0	0	0	0.08	0.07
58803	58803	Pga5	0.06	0	0.03	0.06	0.07	0.03	0	0	0	0	0	0	0	0.03	0.03	0	0.03	0	0	0	0.03	0	0	0	0.03	0	0.1	0.06	0.03	0	0.1	0	0.05	0.11	0.1	0.05	0	0	0	0	0	0	0	0.05	0.05	0	0.05
208890	208890	Slc26a7	3.34	0.24	0.07	0.09	4.98	4.14	1.8	3.97	1.01	0.02	0.05	4.37	12.45	7.99	5.17	0.32	3.38	4.4	8.31	9.42	10.03	3.6	7.97	2.83	8.61	2.86	6.45	2.19	0.47	11.03	5.2	0.4	0.1	0.15	7.59	6.62	3.11	6.25	1.62	0.04	0.08	6.68	19.54	12.53	7.79	0.54	5.09
242915	242915	Garem2	0.32	0.6	0.47	0.79	0.19	0.55	0.88	0.32	0.3	0.71	1.28	0.15	0.37	0.35	0.29	0.54	0.49	0.82	0.21	0.74	0.47	0.49	0.2	1.34	0.4	0.58	0.48	0.53	0.47	0.64	0.5	1.01	0.73	1.33	0.28	0.87	1.53	0.5	0.48	1.18	2.15	0.24	0.58	0.56	0.44	0.93	0.74
12299	12299	Cacng1	73.38	94.01	150.51	123.08	185.45	113.09	37.53	98.79	92.41	104.14	53.85	166.33	83.59	108.61	54.38	247.68	197.21	109.99	138.47	0.2	91.65	133.33	57.56	41.31	88.9	10.56	83.61	72.81	63.16	64.35	114.19	158.27	236.25	207.06	282.65	180.89	64.85	155.55	147.71	173.29	90.69	254.41	131.17	170.31	81.98	422.08	297.3
56075	56075	Pdss1	3.05	2.86	3.53	3.65	3.64	2.6	2.72	3.16	2.9	3.35	4.13	3.79	3.66	3.46	2.29	4.26	4.28	2.7	2.96	3.19	2.71	3.38	4.63	2.58	4.29	2.09	3.45	4.43	2.74	3.06	4.75	4.82	5.54	6.14	5.54	4.17	4.7	4.97	4.64	5.58	6.96	5.8	5.74	5.42	3.45	7.25	6.45
67451	67451	Pkp2	5.44	3.96	2.8	3.14	5.13	4.48	10.54	3.56	8.02	1.96	2.12	2.7	4.06	5.29	8.14	4.18	2.86	4.92	3.4	11.05	4.11	4.96	5.09	4.51	3.69	11.93	3.57	2.51	4.48	3.89	8.47	6.67	4.4	5.28	7.82	7.16	18.2	5.61	12.82	3.26	3.57	4.13	6.38	8.29	12.27	7.12	4.32
252903	252903	Ap1s3	1.95	0.48	0.45	0.49	1.23	1.56	0.93	0.9	0.89	0.67	0.9	0.4	2.09	3.11	0.95	0.26	1.26	1.1	2.32	4.46	1.03	1.03	1.63	1.7	1.62	3.12	1.88	0.75	0.76	1.56	3.04	0.82	0.71	0.83	1.87	2.49	1.61	1.42	1.42	1.12	1.52	0.61	3.29	4.88	1.43	0.45	1.9
433181	433181	Spink11	0	0	0	0	0	0	0.09	0	0	0	0	0	0	0	0	0	0.08	0	0	0	0	0	0.08	0	0	0	0	0	0	0	0	0	0	0	0	0	0.16	0	0	0	0	0	0	0	0	0	0.12
68427	68427	Slc39a13	28.81	44.14	40.08	45.28	31.33	36.54	45.41	30.76	39.03	40.8	47.38	31.41	34.15	27.39	23.84	41.64	31.07	30.69	32.93	44.08	39.01	43.52	27.15	39.29	31.21	36.29	32.43	38.95	38.71	38.75	44.84	74.3	62.91	76.18	47.75	58.45	78.46	48.44	62.39	67.88	79.79	48.05	53.6	42.94	35.95	70.96	46.84
66257	66257	Nicn1	9.53	8.63	7.98	8.19	8.52	10.57	15.19	8.94	14.56	9.93	7.63	8.03	9.91	9.49	9.63	11.36	8.16	9.31	8.61	8.58	9.18	11.63	11.25	9.15	10.68	8.68	9.12	8.48	10.3	8.43	14.84	14.54	12.52	13.77	12.99	16.91	26.24	14.07	23.27	16.53	12.85	12.28	15.56	14.89	14.51	19.35	12.29
19017	19017	Ppargc1a	1.52	1.07	1.67	1.34	1.7	1.51	2.14	1.69	2.67	1.4	0.87	2.32	1.22	1.48	1.92	2.38	1.75	1.63	1.73	0.18	1.03	1.57	1.16	1.17	1.83	0.67	1.59	1.1	1.29	1.02	2.37	1.8	2.62	2.25	2.59	2.41	3.7	2.66	4.27	2.34	1.46	3.55	1.91	2.32	2.9	4.06	2.64
631797	631797	Fer1l6	1.58	0.8	1.59	1.12	1.52	1.57	0.26	1.3	0.96	0.88	0.51	1.88	1.09	1.36	0.98	0.79	1.79	1.43	1.82	0.03	0.65	1.44	0.82	0.65	1.47	0.07	1.05	0.55	1.11	0.65	2.47	1.35	2.49	1.88	2.32	2.51	0.45	2.05	1.54	1.47	0.86	2.87	1.71	2.13	1.48	1.34	2.7
94253	94253	Hecw1	0	0	0	0	0	0.02	0.09	0	0.07	0	0.01	0	0	0	0	0	0	0	0	0	0.01	0.01	0	0.02	0	0	0	0	0.01	0	0	0	0	0.01	0	0.03	0.16	0	0.11	0	0.01	0.01	0	0	0	0	0
72371	72371	2210408I21Rik	0.62	0.98	0.48	0.84	0.32	0.77	0.81	0.58	1.01	0.83	0.69	0.4	0.65	0.77	0.65	0.77	0.68	0.71	0.5	0.85	0.65	0.89	0.97	0.92	0.82	0.78	0.86	0.78	1.08	1	0.96	1.65	0.76	1.4	0.48	1.24	1.39	0.91	1.62	1.39	1.16	0.61	1.01	1.21	0.98	1.32	1.03
18419	18419	Otog	0	0.1	0.15	0.26	0.18	0.04	0	0.01	0	0.16	0.03	0.02	0	0	0.01	1.35	0.08	0.02	0.05	0	0.01	0.73	0.02	0.02	0.03	0	0.08	0.04	0.03	0.04	0	0.16	0.24	0.44	0.28	0.07	0	0.02	0	0.27	0.05	0.02	0.01	0.01	0.01	2.3	0.12
399568	399568	BC052040	2.53	1.26	1.18	1.27	2.24	1.66	1.63	1.94	1.69	1.5	1.89	1.43	1.97	1.89	2.09	1.48	1.38	1.49	1.88	2.98	2.13	1.9	2.18	1.6	1.93	2.33	1.59	1.43	1.41	1.45	3.94	2.12	1.85	2.13	3.41	2.65	2.81	3.06	2.7	2.5	3.19	2.19	3.08	2.96	3.15	2.52	2.08
23871	23871	Ets1	13.79	21.68	13.14	16.66	9.46	12.52	16.62	20.16	14.93	17.47	19.64	13.72	17.62	17.4	11.85	16.21	10.6	13.64	14.12	23.79	19.54	20.12	16.76	23.61	14.59	18.53	16.58	15.56	15.04	20.84	21.47	36.51	20.63	28.03	14.41	20.03	28.72	31.74	23.87	29.07	33.07	20.99	27.65	27.29	17.86	27.63	15.98
72181	72181	Nsun4	11.32	9.4	11	10.97	12.28	11.01	10.62	12.49	11.4	9.85	8.95	11.38	9.9	9.71	10.71	15.98	11.66	8.54	11.35	11.04	9.91	11.64	10.36	9.68	11.91	8.2	10.51	10.61	8.76	9.97	17.62	15.82	17.27	18.45	18.72	17.61	18.34	19.66	18.21	16.39	15.07	17.4	15.54	15.22	16.14	27.24	17.58
115487746	115487746	LOC115487746	0.26	0.08	0.35	0.23	0.11	0.18	0.28	0.16	0.12	0.23	0.15	0.22	0.27	0.31	0.19	0.25	0.32	0.18	0.2	0.44	0.22	0.4	0.19	0.27	0.31	0.37	0.24	0.31	0.08	0.33	0.41	0.13	0.55	0.39	0.17	0.29	0.49	0.25	0.19	0.39	0.26	0.34	0.43	0.48	0.28	0.42	0.49
271221	271221	Rubcnl	1.59	1.84	0.95	1.59	0.95	1.33	0.82	1.21	1.01	1.24	1.5	1.12	1.05	0.94	0.91	0.7	1.32	1.4	1.53	1.41	1.32	0.85	1.41	1.4	1.65	1.09	1.47	1.57	1.37	1.48	2.47	3.1	1.49	2.67	1.45	2.13	1.41	1.91	1.62	2.06	2.53	1.72	1.65	1.48	1.37	1.19	1.99
22130	22130	Ttf1	4.41	4.52	3.25	4.3	3.62	4.07	5.4	4.17	3.95	3.81	4.45	3.3	3.78	4.43	3.76	3.68	3.21	3.71	3.93	6.51	4.2	4.68	4.45	5.14	5.22	6.36	4.63	3.63	4.26	4.72	6.87	7.61	5.09	7.23	5.52	6.51	9.33	6.56	6.31	6.34	7.49	5.04	5.93	6.94	5.68	6.27	4.83
75104	75104	Mmd2	0.08	0.17	0.1	0.17	0.08	0.26	1.84	0.13	1.58	0.07	0.09	0.05	0.1	0.13	1.88	0.25	0.07	0.29	0.1	0.11	0.14	0.1	0.16	0.24	0.12	0.22	0.19	0.12	0.26	0.15	0.13	0.28	0.16	0.28	0.12	0.42	3.18	0.2	2.52	0.12	0.15	0.08	0.16	0.2	2.84	0.42	0.11
209497	209497	Tmem164	17.8	13.59	12.65	15.4	15.29	15.31	19.5	16.86	17.01	18.9	20.83	14.16	20.2	16.64	12.33	13.7	15.21	19.3	18.61	32.87	21.48	20.31	20.47	22.06	16.72	29.49	18.24	14.72	15.05	18.84	27.7	22.88	19.86	25.91	23.3	24.49	33.7	26.55	27.18	31.45	35.07	21.66	31.7	26.1	18.59	23.35	22.94
67053	67053	Rpp14	12.27	10.33	10.4	9.48	11.46	12.25	11.92	11.56	11.9	8.8	10.68	11.54	12.26	12.26	10.53	13.06	12.63	11.17	13.14	10.33	9.98	11.74	12.58	9.83	10.94	9.23	10.69	11.4	10.22	9.29	19.1	17.39	16.32	15.95	17.46	19.6	20.6	18.2	19.03	14.65	17.98	17.65	19.24	19.22	15.87	22.26	19.04
74167	74167	Nudt9	47.99	47.38	45.75	37.89	51.22	43.25	39.87	46.96	47.33	40.57	37.73	48.5	47.26	48.02	42.4	48.27	49.44	49.13	54.38	41.72	48.69	48.12	42.51	36.81	41.45	36.41	38.98	46.06	43.6	39.25	74.69	79.77	71.82	63.74	78.06	69.18	68.88	73.94	75.65	67.51	63.54	74.18	74.16	75.3	63.92	82.26	74.54
73942	73942	Fam151b	2.37	3.17	2.87	3.71	3.1	2.89	3.04	2.3	3.82	2.72	3.22	3.72	2.63	2.24	3.39	4.16	3.68	2.92	3.55	2.99	2.97	3.14	3.12	2.18	2.7	2.93	2.86	3.06	2.85	2.83	3.68	5.33	4.5	6.25	4.72	4.63	5.25	3.62	6.1	4.53	5.42	5.7	4.13	3.52	5.12	7.09	5.55
100271704	100271704	Gm17660	0.29	0.14	0	0	0	0	0	0.14	0	0	0	0	0	0.15	0.14	0	0	0	0	0	0.15	0.3	0	0.14	0.14	0	0	0.14	0	0	0.44	0.24	0	0	0	0	0	0.22	0	0	0	0	0	0.23	0.22	0	0
17752	17752	Mt4	0	0.28	0	0	0	0	0	0	0	0	0	0	0	0	0	0	0	0	0	0	0	0	0	0	0	0	0.27	0.79	0	0.77	0	0.48	0	0	0	0	0	0	0	0	0	0	0	0	0	0	0
65111	65111	Dap3	43.05	38.92	42.3	35.69	47.83	42.34	41.53	43.66	47.97	39.6	42.38	43.45	47.68	45.55	39.8	44.19	45.74	40.85	46.38	49	45.02	49.91	46.17	35.23	36.99	39.05	37.91	46.15	36.02	36.48	67	65.52	66.39	60.03	72.9	67.72	71.76	68.75	76.68	65.9	71.37	66.45	74.82	71.42	60.01	75.31	68.95
68497	68497	Arel1	9.66	9.53	8.69	8.99	8.82	8.88	10.08	9.05	9.66	8.85	9.5	7.58	8.04	8.86	8.39	10.75	7.25	7.84	8.24	10.55	8.42	9.07	9.8	10.42	9.99	11.47	9.78	8.33	8.94	9.71	15.03	16.05	13.64	15.13	13.45	14.2	17.42	14.25	15.44	14.73	16.01	11.59	12.61	13.89	12.64	18.32	10.92
229473	229473	Tmem131l	6.77	5.03	5.32	5.17	7.11	6.22	5.27	6.01	4.88	5.44	5.71	6.89	6.43	6.39	6.82	7.73	6.43	5.35	6.15	8.41	6.55	7.43	6.52	6.36	6.77	7.1	6.21	5.4	4.88	5.68	10.53	8.47	8.35	8.69	10.83	9.94	9.1	9.47	7.8	9.04	9.62	10.54	10.08	10.02	10.28	13.18	9.69
245174	245174	Zfp937	1.44	1.09	1	1.15	1.21	1.27	1.41	1.23	1.51	1.06	1.38	1.3	1.25	1.45	1.16	0.92	1.21	1.17	1.25	1.97	1.64	1.43	1.62	1.63	1.65	1.69	1.44	1.16	1.12	1.27	2.25	1.83	1.57	1.94	1.84	2.04	2.44	1.93	2.42	1.76	2.32	1.99	1.96	2.28	1.75	1.57	1.83
75477	75477	Pfn3	0	0	0	0	0	0	0	0	0	0	0.13	0	0	0	0	0	0.13	0	0	0.13	0	0	0	0	0	0.13	0.13	0.13	0	0	0	0	0	0	0	0	0	0	0	0	0.22	0	0	0	0	0	0.2
68177	68177	Ebpl	8.03	9.65	6.52	8.51	7.81	7.69	8.43	8.66	10.13	7.76	9.36	9.27	8.41	7.65	26.88	7.55	10.56	9.58	10.7	11.53	9.67	12.25	6.48	5.82	7.12	5.01	7.74	7.89	8.74	7.54	12.49	16.24	10.23	14.32	11.91	12.31	14.56	13.63	16.19	12.92	15.75	14.18	13.2	11.99	40.52	12.87	15.92
27049	27049	Etv3	8.62	7.58	6.96	8.1	6.91	6.96	8.22	6.68	6.67	8.33	10.25	6.91	7.26	7.78	5.81	8.14	6.99	6.8	7.92	9.43	7.85	8.13	9.33	12.08	10.32	11.69	9.54	8.33	8.12	9.38	13.41	12.76	10.93	13.62	10.54	11.14	14.19	10.52	10.66	13.86	17.27	10.57	11.39	12.2	8.76	13.88	10.53
76640	76640	1700113H08Rik	0.31	0.07	0.1	0.07	0.04	0.27	0.08	0.07	0.08	0.07	0.03	0	0.14	0.33	0.11	0.04	0.14	0.14	0.22	0	0.22	0	0.04	0.03	0.14	0	0.07	0.17	0.17	0.13	0.48	0.12	0.16	0.11	0.05	0.43	0.14	0.11	0.13	0.11	0.06	0	0.23	0.51	0.16	0.06	0.21
384701	384701	Usp17ld	0	0.03	0	0	0	0	0	0	0	0	0	0	0	0	0	0.03	0	0	0	0	0	0	0	0	0	0	0	0	0	0	0	0.05	0	0	0	0	0	0	0	0	0	0	0	0	0	0.05	0
71474	71474	Ppp6r2	12.72	10.61	13.28	10.77	15.33	12.81	11.02	14.42	14.88	11.22	10.53	17.28	11.81	12.39	11.04	14.97	13.64	11.01	14.08	8.1	11.74	12.37	12.33	9.15	12.65	7.38	12.02	12.39	10.75	10.05	19.8	17.86	20.85	18.11	23.36	20.5	19.03	22.71	23.79	18.67	17.73	26.43	18.54	19.42	16.64	25.5	20.56
19059	19059	Ppp3r2	0	0	0	0	0	0.04	0	0	0	0	0	0.01	0	0	0	0	0	0	0.01	0	0	0.01	0	0	0.01	0.01	0	0	0	0	0	0	0	0	0	0.06	0	0	0	0	0	0.02	0	0	0	0	0
621976	621976	Tmem170b	3.51	3.03	3.18	3.23	3.58	3.5	3.05	3.21	2.97	2.93	3.32	3.92	3.86	3.27	3.34	4.12	3.49	3.6	3.77	2.98	3.29	2.9	3.08	4.44	4.04	4.03	3.91	3.06	3.2	3.77	5.46	5.09	4.99	5.43	5.46	5.6	5.26	5.06	4.75	4.87	5.59	6	6.06	5.14	5.04	7.03	5.26
381484	381484	Gm5150	1.64	1.3	2.3	3.16	1.26	1.02	1.88	1.25	0.72	3.47	3.6	1.76	2.23	1.15	2.15	1.57	1.74	3.53	2	2.77	2.45	1.98	1.4	4.56	2.8	2.59	2.63	3.4	1.26	2.51	2.56	2.19	3.61	5.32	1.93	1.63	3.25	1.97	1.15	5.77	6.06	2.7	3.5	1.81	3.25	2.67	2.62
12032	12032	Bcan	0.06	0.12	0.08	0.29	0.04	0.17	0.61	0.01	0.65	0.18	0.21	0.03	0.05	0.09	0.09	0.04	0.03	0.13	0.06	0.13	0.21	0.17	0.2	0.37	0.1	0.21	0.25	0.24	0.21	0.13	0.09	0.2	0.12	0.49	0.06	0.27	1.05	0.01	1.03	0.29	0.35	0.04	0.08	0.14	0.14	0.07	0.04
72972	72972	Ccser2	16.33	15.93	14.57	15.26	16.26	17.58	20.46	17.14	20.29	14.74	14.29	18.53	16.13	18.26	12.87	17.35	16.6	16.14	16.45	16.95	16.7	16.86	19.08	16.5	16.32	19.38	16.55	13.52	15.44	15.95	25.41	26.82	22.87	25.67	24.78	28.11	35.36	26.99	32.42	24.53	24.07	28.34	25.31	28.63	19.41	29.57	25.03
14601	14601	Ghrh	0.02	0.45	0.02	0.14	0	0	1.25	0.15	0.01	0.14	0	0.02	0	0.32	0.03	0	0	0.15	0	0.32	0	0.16	0.65	0.02	0.01	0.33	0	0	0.02	0.16	0.03	0.75	0.03	0.24	0	0	2.16	0.24	0.02	0.24	0	0.03	0	0.5	0.05	0	0
14171	14171	Fgf17	0.08	0.08	0.03	0.13	0.06	0.05	0.06	0.05	0.03	0.05	0.03	0.08	0.11	0.08	0.19	0.11	0.14	0.03	0.14	0.24	0.06	0.2	0.11	0.11	0.16	0.08	0.03	0.08	0.08	0.13	0.12	0.14	0.04	0.22	0.09	0.08	0.11	0.08	0.05	0.09	0.04	0.13	0.17	0.13	0.28	0.19	0.2
13000	13000	Csnk2a2	14.78	18.05	14.25	15.61	14.64	13.07	17.51	14.78	16.97	13.85	16.86	12.14	17.13	16.57	14.66	18.13	13.38	13.15	14.91	22.06	16.54	19.6	16.48	16.3	14.59	17.49	14.36	16.17	14.77	16.55	23	30.4	22.36	26.26	22.32	20.91	30.26	23.27	27.12	23.04	28.39	18.57	26.87	25.97	22.11	30.9	20.18
24045	24045	Scamp3	42.72	50.2	38.71	41.16	39.74	40.85	40.76	40.85	42.66	51.23	49.87	37.87	43.8	40.81	37.15	43.14	37.65	43.78	38.06	47.66	43.1	46.02	38.61	44.44	40.96	41.88	42.13	55.67	42.72	45.18	66.49	84.51	60.77	69.24	60.57	65.33	70.43	64.33	68.19	85.24	83.98	57.92	68.74	63.98	56	73.51	56.77
258777	258777	Olfr922	0	0	0	0	0	0	0	0	0	0.04	0	0	0	0	0	0	0	0	0	0	0	0	0	0	0	0	0	0	0	0	0	0	0	0	0	0	0	0	0	0.07	0	0	0	0	0	0	0
72160	72160	Tmem163	0.12	0.03	0.03	0.02	0	0.11	0.12	0.02	0.06	0.02	0.03	0.02	0	0.02	0.07	0.02	0.02	0.03	0.02	0	0.05	0	0.02	0.07	0.05	0.03	0.02	0.08	0.05	0.16	0.18	0.06	0.05	0.03	0	0.18	0.2	0.03	0.09	0.03	0.05	0.03	0	0.03	0.1	0.03	0.03
76747	76747	Dapl1	0	0	0.12	0	0	0	0.14	0	0	0	0	0	0	0.25	0	0	0.12	0	0.13	0.12	0	0	1.87	0	0.12	0	0.23	0	0.12	0	0	0	0.19	0	0	0	0.24	0	0	0	0	0	0	0.39	0	0	0.18
12785	12785	Cnbp	232.39	197.76	254.69	213.9	266.68	229.7	185.24	251.2	222.11	189.81	191.72	289.08	231.12	251.21	194.7	213.7	293.54	235.78	278.64	156.38	208.44	216.78	244.84	161.4	217.05	136.29	205.95	222.11	202.78	190.62	361.67	332.94	399.78	359.84	406.45	367.4	320.06	395.52	355.01	315.83	322.87	442.15	362.68	393.91	293.52	364.18	442.52
56175	56175	Bace2	10.04	7.38	6.02	9.15	23.18	9.78	13.55	6.64	10.75	8.76	7.35	5.03	6.87	6.07	8.69	7.56	6.28	7.67	4.46	12.49	7.69	10.25	15.16	9.26	6.75	28.66	8.53	14.15	10.96	12.02	15.63	12.42	9.45	15.39	35.33	15.65	23.41	10.46	17.18	14.57	12.38	7.69	10.78	9.52	13.1	12.89	9.47
76633	76633	Lrmda	4.68	4.23	2.96	4.14	4.46	4.78	4.3	4.52	5.74	4.57	4.83	0.2	0.35	0.41	0.27	0.57	0.62	0.8	0.39	0.55	0.76	0.38	0.48	0.74	0.7	0.5	0.59	0.65	0.47	0.86	7.28	7.12	4.64	6.97	6.79	7.65	7.43	7.11	9.17	7.61	8.13	0.31	0.56	0.64	0.41	0.98	0.94
243906	243906	Zfp14	1.73	1.81	2.91	2.36	2.32	1.75	3.17	2.24	2.57	1.72	1.55	2.29	2.36	2.53	1.49	3.64	2.7	2.03	2.33	1.67	1.81	2.94	1.94	1.64	2.44	1.47	2.28	1.81	1.57	1.45	2.69	3.04	4.56	3.98	3.54	2.8	5.48	3.53	4.1	2.86	2.61	3.5	3.7	3.97	2.25	6.21	4.08
17952	17952	Naip6	2.39	0.71	0.98	1.32	2.06	1.08	0.79	1.5	0.58	0.76	1.47	0.76	1.71	2.34	1.2	0.6	1.04	1.31	1.93	6.19	2.25	1.68	2.23	2.41	1.83	6.89	1.42	0.78	0.89	2.31	3.72	1.19	1.54	2.23	3.13	1.73	1.36	2.36	0.93	1.27	2.47	1.16	2.68	3.68	1.81	1.02	1.56
382083	382083	Snx22	2.15	1.53	1.61	1.15	0.89	0.88	0.94	0.97	0.44	1.69	2.21	1.38	1.67	1.38	1.35	1.51	1.21	1.83	1.06	2.47	1.63	1.61	1.31	1.79	1.63	1.2	1.14	2.44	1.26	0.56	3.34	2.58	2.52	1.94	1.35	1.4	1.63	1.52	0.7	2.82	3.72	2.12	2.62	2.16	2.03	2.58	1.82
20362	20362	Sept8	18.74	35.16	23.49	31.46	18.28	22.8	27.92	23.38	21.55	31.32	33.31	17.11	24.17	21.22	15.43	25.66	18.32	22.16	21.26	35.17	23.92	25.95	24.29	34.05	24.43	27.81	28.3	27.71	27.45	29.8	29.17	59.19	36.87	52.92	27.86	36.46	48.24	36.82	34.45	52.12	56.1	26.17	37.92	33.28	23.27	43.73	27.62
21366	21366	Slc6a6	26.52	77.56	26.41	43.36	23.07	24.87	31.75	26.81	25.08	35.47	59.47	28.23	35.11	32.25	26.73	52.83	26.01	32.74	30.56	39.21	37.6	39.68	30.56	52.5	40.44	39.83	41.69	36.09	45.56	47.52	41.27	130.57	41.46	72.94	35.16	39.78	54.86	42.22	40.09	59.03	100.16	43.17	55.1	50.57	40.3	90.02	39.21
20449	20449	St8sia1	0.32	0.21	0.28	0.3	0.2	0.28	0.56	0.26	0.74	0.44	0.32	0.27	0.29	0.29	0.25	0.29	0.23	0.28	0.36	0.41	0.22	0.32	0.28	0.34	0.35	0.34	0.3	0.22	0.26	0.26	0.5	0.36	0.43	0.5	0.31	0.44	0.97	0.4	1.18	0.73	0.54	0.42	0.45	0.45	0.37	0.5	0.34
67459	67459	Nvl	4.69	5.05	4.06	4.18	4.16	3.9	5.03	4.19	4.04	3.84	4.83	3.71	4.34	4.96	3.46	6.28	3.73	3.23	4.26	5.46	4.1	5.36	5.54	5.01	5.26	5.49	5.4	3.86	4.09	4.94	7.3	8.5	6.38	7.04	6.34	6.23	8.7	6.6	6.46	6.39	8.13	5.67	6.82	7.78	5.21	10.7	5.63
20216	20216	Acsm3	0.07	0.03	0.06	0	0.1	0.08	0.07	0.11	0.04	0.1	0.14	0.03	0.15	0.19	9.21	0.06	0.04	0.03	0.05	0.35	0.08	0.15	0.37	0.05	0.03	0.3	0.05	0.19	0.12	0.04	0.11	0.05	0.1	0	0.16	0.12	0.12	0.17	0.06	0.16	0.24	0.05	0.24	0.3	13.88	0.11	0.07
227210	227210	Ccnyl1	8.17	14.37	11.47	14.51	8.37	9.43	12.51	10.4	10.59	11.17	12.46	10.96	11.61	11.23	8.1	9.88	8.77	9.22	11.11	11.27	11.62	11.59	11.15	13.07	10.35	10.54	12.14	12.4	13.04	14.17	12.72	24.2	18.01	24.42	12.75	15.08	21.61	16.37	16.92	18.59	20.98	16.76	18.22	17.6	12.2	16.83	13.22
17308	17308	Mgat1	39.04	43.41	43.34	45.9	36.51	40.84	46.25	37.08	41.47	48.23	55.63	37.55	43.25	36.58	39.33	38.6	39.21	46.71	40.29	52.07	46.96	45.68	35.84	47.76	37.96	42.73	39.03	48.11	45.12	41.99	60.75	73.09	68.02	77.21	55.64	65.32	79.91	58.38	66.28	80.25	93.68	57.43	67.86	57.37	59.3	65.79	59.11
103765	103765	Tmem17	3.3	2.96	2.42	2.42	2.75	3.51	3.31	3.19	4.01	2.99	2.86	2.68	3.5	3.58	3.26	4.38	3.35	2.89	3.45	2.74	3.55	4.37	3.74	2.48	2.86	2.49	2.53	3.19	2.58	2.54	5.14	4.99	3.8	4.07	4.19	5.62	5.73	5.03	6.41	4.97	4.82	4.09	5.5	5.62	4.92	7.47	5.05
664799	664799	Ctcfl	0.1	0.14	0.07	0.09	0.04	0.1	0.15	0.1	0.21	0.08	0.03	0.05	0.12	0.1	0.17	0.12	0.09	0.06	0.09	0.22	0.16	0.22	0.08	0.14	0.13	0.09	0.06	0.11	0.14	0.13	0.16	0.23	0.11	0.16	0.06	0.16	0.25	0.16	0.34	0.13	0.06	0.07	0.19	0.16	0.25	0.21	0.13
14842	14842	Gsx1	0	0	0	0	0	0	0	0	0	0	0	0	0	0	0	0	0	0	0.03	0	0	0	0	0	0	0	0	0	0	0	0	0	0	0	0	0	0	0	0	0	0	0	0	0	0	0	0
333048	333048	Tmem211	0.07	0.02	0	0.02	0	0	0	0.02	0	0	0	0.01	0.05	0	0	0.01	0	0	0.03	0.18	0.03	0.05	0.05	0.03	0.05	0.02	0	0	0	0	0.11	0.04	0	0.04	0	0	0	0.04	0	0	0	0.02	0.08	0	0	0.02	0
55950	55950	Bri3	63.66	53.78	47.71	52.88	53.13	53.25	57.88	53.54	69.87	63.07	56.4	61.38	66.11	56.85	61.02	44.46	63.49	64.32	66.38	81.74	75.03	71.92	43.24	55.71	54.86	56.87	47.17	65.88	51.24	56.84	99.07	90.55	74.89	88.96	80.97	85.18	100.01	84.31	111.68	104.94	94.97	93.89	103.73	89.14	91.99	75.76	95.71
72282	72282	1810062G17Rik	0.81	0.35	0.7	0.56	0.48	0.66	0.75	0.79	0.32	0.67	0.79	0.42	0.78	0.6	0.88	0.72	0.58	0.4	0.43	0.59	1.04	0.92	0.47	0.46	0.9	0.4	0.4	1.23	0.52	0.27	1.25	0.59	1.1	0.94	0.73	1.06	1.29	1.25	0.52	1.12	1.33	0.64	1.22	0.94	1.32	1.23	0.87
71978	71978	Ppp2r2a	18.73	16.72	16.67	15.01	18.23	17.15	18.68	20.38	18.82	16.31	16.21	18.35	18.3	18.42	13.9	15.49	16.79	17.4	19.52	21.96	19.33	18.03	20.69	17.02	17.15	19.51	17.61	16.99	17.21	17.3	29.14	28.15	26.16	25.26	27.78	27.43	32.27	32.09	30.08	27.14	27.3	28.06	28.72	28.88	20.96	26.39	25.31
60530	60530	Fignl1	2.67	2.67	2.6	3.3	1.68	2.41	2.5	2.6	1.71	2.55	5.42	1.34	3.54	3.4	1.63	2.41	2.23	2.88	2.83	4.65	3.4	3.11	5	3.34	2.43	2.84	3.63	2.94	2.9	3.53	4.16	4.49	4.08	5.56	2.57	3.86	4.33	4.09	2.73	4.25	9.13	2.05	5.55	5.33	2.45	4.1	3.36
81489	81489	Dnajb1	9.86	10.64	9.36	11.34	7.93	10.37	14.77	11.84	10.38	11.45	12.09	6.17	10.48	11.17	8.68	10.03	7.6	9.77	9.83	16.2	9.73	11.01	11.43	12.56	9.88	15.27	12.46	10.66	12.31	12.34	15.34	17.91	14.69	19.08	12.08	16.59	25.52	18.65	16.59	19.05	20.35	9.43	16.45	17.51	13.08	17.1	11.45
66447	66447	Mgst3	51.19	46.09	59.34	42.69	67.37	57.03	41.31	61.69	73.38	42.08	36.16	68.31	46.37	53.03	42.45	32.6	60.45	54.73	49.67	39.92	47.87	41.97	41.55	33.59	55.06	34.45	40.92	56.83	49.37	40.81	79.67	77.59	93.14	71.81	102.67	91.22	71.37	97.13	117.28	70.02	60.89	104.49	72.76	83.15	64	55.56	91.13
21374	21374	Tbp	7.52	6.73	5.07	6.6	5.02	6.26	8.16	7.35	7.38	6.34	7.45	5.1	6.76	7.63	5.14	6.07	5.47	6.69	7.12	9.58	7.31	7.63	8.32	8.78	6.72	8.61	6.83	7.12	6.25	8.38	11.7	11.34	7.96	11.1	7.65	10.01	14.1	11.57	11.8	10.56	12.55	7.8	10.61	11.97	7.74	10.35	8.25
224065	224065	Uts2b	0	0	0	0	0	0	0	0.06	0	0	0	0	0	0	0	0	0	0	0	0	0	0	0	0	0	0	0	0	0	0	0	0	0	0	0	0	0	0.1	0	0	0	0	0	0	0	0	0
381853	381853	Gipr	0.28	1.4	0.4	1.59	0.43	0.34	0.5	0.55	0.44	0.49	0.8	0.36	0.27	0.29	0.1	0.31	0.48	0.31	0.41	0.65	0.65	0.38	0.32	0.68	0.34	0.57	0.34	0.8	0.51	0.93	0.44	2.36	0.62	2.67	0.66	0.54	0.86	0.87	0.7	0.81	1.35	0.55	0.42	0.46	0.15	0.52	0.72
19344	19344	Rab5b	39.16	42.65	38.32	37.32	38.64	40.41	48.37	38.69	47.55	37.64	34.11	40.19	37.36	38.48	39.34	46.64	38.47	40.91	37.46	36.39	37.9	38.9	40.63	41.89	44.09	41.45	41.42	42.19	42.89	40.77	60.95	71.8	60.15	62.78	58.89	64.63	83.57	60.92	76.01	62.63	57.45	61.47	58.63	60.33	59.31	79.48	57.99
110012	110012	Tpgs1	37.55	28.69	31.23	29.7	34.19	33.33	34.85	32.91	39.43	30.22	29.67	30.84	35.54	31.91	27.12	32.42	27.97	30.85	30.61	33.77	35.5	37.05	30.16	27.16	28.45	28.14	26.95	32.97	31.45	31.39	58.44	48.29	49.02	49.97	52.12	53.31	60.2	51.82	63.03	50.28	49.97	47.17	55.77	50.03	40.89	55.24	42.17
19273	19273	Ptpru	3.9	3.41	0.8	1.16	3.95	1.81	5.05	1.86	4.09	0.99	1.68	0.89	3.33	2.98	1.65	0.78	0.86	1.25	1.68	3.79	1.65	1.76	8.31	1.92	3.68	8.7	2.25	1.71	2.74	2.7	6.07	5.74	1.25	1.95	6.01	2.89	8.72	2.93	6.53	1.65	2.83	1.37	5.22	4.67	2.48	1.33	1.3
20859	20859	Sult2a1	0	0	0	0	0	0	0	0	0	0	0	0	0	0	30.02	0	0	0	0	0	0	0	0	0	0	0	0	0	0	0	0	0	0	0	0	0	0	0	0	0	0	0	0	0	45.26	0	0
223809	223809	Smgc	0	0	0	0	0	0	0	0	0	0	0	0	0	0	0	0	0	0	0	0	0	0.01	0	0	0	0	0	0	0	0.01	0	0	0	0	0	0	0	0	0	0	0	0	0	0	0	0	0
240066	240066	Zfp870	2.1	1.88	1.62	1.94	1.78	1.9	2.22	1.8	2.5	1.8	1.84	2.4	2	2.05	1.71	1.89	1.91	1.71	1.91	2.07	1.96	2.08	2.14	1.88	2.24	1.78	2.06	1.88	1.73	1.75	3.27	3.16	2.54	3.26	2.72	3.04	3.84	2.83	4	3	3.09	3.66	3.14	3.22	2.57	3.21	2.88
108168373	108168373	Gm46617	0.03	0.26	0.29	0.37	0.17	0.22	0.23	0.22	0.44	0.16	0.19	0.1	0.07	0.27	0.2	0.93	0.23	0.16	0.27	0.43	0.34	0.31	0.2	0.29	0.35	0.16	0.32	0.38	0.16	0.31	0.05	0.44	0.46	0.63	0.26	0.35	0.39	0.35	0.7	0.26	0.32	0.15	0.1	0.42	0.3	1.59	0.34
20224	20224	Sar1a	86.63	100.71	92.51	103.63	83.69	92.26	96.99	88.38	94.96	105.91	111.68	80.57	92.26	80.77	70.63	93.86	84.63	90.84	88.9	105.5	94.28	97.22	96.01	98.66	80.69	93.58	91.92	108.43	96.73	98.95	134.82	169.55	145.2	174.33	127.56	147.58	167.58	139.16	151.78	176.23	188.08	123.23	144.77	126.65	106.48	159.95	127.58
76478	76478	Haus8	9.78	8.11	8.83	8.53	7.7	7.63	7.82	8.43	7.11	8.8	12.38	9.29	11.91	9.05	6.65	8.07	8.08	11.39	10.34	12.65	11.32	10.69	9.49	9.83	8.87	8.81	9.23	9.78	8.22	9.57	15.21	13.66	13.87	14.35	11.74	12.21	13.51	13.28	11.37	14.64	20.84	14.2	18.69	14.2	10.03	13.75	12.18
109135	109135	Plekha5	10.41	7.65	4.6	6.36	7.42	8.38	20.26	9.31	17.01	5.42	6.59	4.69	8.93	10.57	8.47	8.16	5.53	7.46	7.9	14.69	9.51	9.71	10.11	10.01	12.04	12.69	13.85	7.55	10.17	9.3	16.21	12.88	7.22	10.7	11.32	13.41	35.01	14.66	27.18	9.02	11.1	7.18	14.01	16.58	12.78	13.91	8.33
53901	53901	Rcan2	9.43	6.56	9.26	6.77	11.65	11.17	5.2	10.4	7.72	7.21	4.55	13.64	7.26	8.05	7.13	6.33	10.25	9.07	8.25	3.24	6.36	6.05	8.12	5.11	11.28	4.02	8.86	7.54	9.01	5.15	14.67	11.04	14.54	11.38	17.76	17.87	8.98	16.38	12.34	12.01	7.66	20.87	11.39	12.62	10.75	10.79	15.46
66983	66983	Zfp830	7.92	7.64	7.4	7.49	7.46	7.39	9.53	8.15	8.91	7.16	7.74	7.26	8.93	7.7	6.5	7.92	7.98	7.76	8.08	9.81	7.88	8.87	7.9	7.36	7.34	7.83	7.64	6.7	7.54	7.67	12.33	12.86	11.61	12.59	11.36	11.82	16.46	12.83	14.24	11.91	13.04	11.11	14.01	12.08	9.8	13.49	12.03
56318	56318	Acpp	3.2	0.39	0.35	0.59	0.92	0.96	0.66	0.94	0.35	0.36	0.6	0.78	1.47	1.7	0.73	0.35	0.91	1.17	1.99	3.01	1.23	0.38	1.51	1.75	1.86	3.42	1.53	0.69	0.55	1.38	4.99	0.66	0.55	0.99	1.41	1.54	1.14	1.48	0.56	0.6	1.02	1.19	2.31	2.67	1.1	0.59	1.38
74174	74174	Gtsf1	0	0	0	0.08	0.09	0	0.1	0	0.1	0.08	0.35	0	0	0.08	0	0.17	0	0.32	0.09	0.09	0.09	0	0.09	0.26	0	0	0.08	0.08	0.24	0.15	0	0	0	0.14	0.13	0	0.17	0	0.15	0.13	0.58	0	0	0.13	0	0.29	0
53609	53609	Clasrp	17.96	16.6	13.47	14.75	14.92	14.04	24.32	15.78	20.19	12.82	14.82	12.77	17.73	18.93	13.18	16.91	10.66	11.93	19.21	24.04	19.31	20.35	17.56	17	17.33	19.97	16.52	14.22	15.02	16.52	27.96	27.95	21.14	24.81	22.75	22.45	42.01	24.84	32.27	21.34	24.95	19.53	27.82	29.68	19.87	28.81	16.07
224826	224826	Ubr2	14.23	14.15	13.24	12.72	11.91	12.66	14.86	13.45	13.76	12.26	12.59	12.03	12.82	13.29	12.31	15.87	10.26	10.29	12.51	13.75	12.64	14.08	14.51	14.49	15.89	13.38	14.75	11.38	12.3	14.04	22.14	23.82	20.79	21.41	18.15	20.25	25.68	21.18	22	20.4	21.2	18.39	20.11	20.84	18.56	27.04	15.46
12525	12525	Cd8a	0.4	0.08	0.5	0.3	0.29	0.33	0.57	0.07	0.19	0.28	0.49	0.3	0.22	0.19	0.23	0.12	0.2	0.14	0.27	0.16	0.13	0.14	0.16	0.29	0.33	0.29	0.31	0.4	0.12	0.26	0.63	0.13	0.79	0.51	0.44	0.53	0.99	0.1	0.31	0.47	0.82	0.46	0.34	0.3	0.34	0.21	0.3
12492	12492	Scarb2	39.81	46.76	45.15	49.23	36.9	43.56	48.58	37.95	52.23	58.06	59.02	40.79	37.29	34.76	38.98	43.98	41.91	47.96	37.51	44.15	46.49	40.81	39.36	51.89	44.5	46.78	45.87	52.83	47.99	47.62	61.96	78.72	70.87	82.82	56.24	69.67	83.93	59.76	83.48	96.6	99.39	62.39	58.52	54.51	58.76	74.95	63.18
73692	73692	Cplane1	2.79	2.97	1.92	2.39	1.99	2.35	3.37	2.47	2.76	2.57	2.61	1.85	2.43	2.73	1.85	2.35	1.68	1.89	2.54	3.9	2.9	2.68	2.66	3.04	3.04	2.99	2.82	2.02	2.36	2.69	4.33	4.99	3.01	4.02	3.04	3.76	5.82	3.9	4.4	4.27	4.39	2.83	3.81	4.27	2.79	4.01	2.53
108737	108737	Oxsr1	20.32	18.3	18.65	16.45	19.26	19.45	17.65	20.05	20.85	15.44	15.02	20.47	19.97	19.87	15.17	18.05	19.19	19.67	22.12	16.62	18.69	18.59	18	15.6	17.3	15.09	17.58	16.37	18.8	16.98	31.62	30.81	29.28	27.67	29.36	31.12	30.49	31.57	33.33	25.69	25.29	31.31	31.34	31.15	22.88	30.75	28.93
66617	66617	Ntmt1	28.17	21.43	17.83	18.85	22.57	23.49	25.56	22.8	21.18	17.85	22.15	16.8	23.1	24.04	16.54	18.32	18.08	19.8	22.21	35.46	22.41	26.08	26.9	17	20.01	23.05	21.29	25.42	19.48	19.26	43.84	36.08	27.99	31.71	34.4	37.57	44.15	35.9	33.85	29.7	37.31	25.7	36.24	37.69	24.94	31.21	27.26
16512	16512	Kcnh3	1.81	0.43	0.51	0.36	1.2	1.19	2.06	1.27	1.28	1.45	0.96	0.74	1.22	0.81	0.73	0.27	1.01	0.61	0.81	0.82	1.03	0.6	1.01	1	1.65	0.86	1	1.08	0.75	1.08	2.82	0.72	0.79	0.61	1.82	1.9	3.55	2.01	2.04	2.41	1.62	1.13	1.91	1.27	1.09	0.46	1.52
215476	215476	Prr14l	3.19	3.02	2.56	3.12	2.41	2.71	3.67	3.14	2.81	2.92	3.67	1.96	2.79	3.24	2.37	2.82	2.29	2.22	2.8	4.6	3.32	3.16	3.85	3.9	3.63	5.29	3.8	2.4	2.63	3.65	4.97	5.08	4.02	5.25	3.67	4.33	6.35	4.94	4.5	4.85	6.18	2.99	4.38	5.09	3.57	4.8	3.46
194388	194388	Tet3	6.27	7.03	6.08	7.2	6.35	6.8	7.32	7.14	6.62	6.61	7.57	6.48	8.19	7.68	5.6	7.66	6.84	6.55	8.03	10.73	8.27	9.32	7.91	9.41	8.27	9.68	8.5	5.04	6.31	7.5	9.76	11.84	9.54	12.11	9.67	10.88	12.64	11.24	10.59	11	12.76	9.9	12.86	12.04	8.45	13.05	10.32
27261	27261	Dok3	10.74	13.29	17.11	17.62	8.94	11.01	14.14	10.77	12.28	19.28	30.09	11.44	16.69	9.07	8.72	10.69	12.07	14.31	14.71	16.93	20.01	12.03	10.52	18.86	12.36	12.32	12.26	18.42	12.01	14.17	16.72	22.37	26.86	29.65	13.62	17.61	24.43	16.96	19.63	32.08	50.68	17.49	26.2	14.23	13.15	18.21	18.19
100862324	100862324	LOC100862324	0.03	0.09	0.33	0.11	0	0.1	1.02	0.03	0.88	0.22	0.03	0.2	0.13	0.29	0	0	0.15	0.08	0	0	0.12	0.07	0.22	0.17	0.07	0.14	0.14	0.05	0	0	0.05	0.15	0.51	0.18	0	0.17	1.76	0.05	1.4	0.36	0.05	0.3	0.21	0.46	0	0	0.23
330450	330450	Far2	0.23	0.29	0.26	0.34	0.14	0.15	0.51	0.14	0.54	0.26	0.35	0.16	0.16	0.28	0.2	0.29	0.28	0.19	0.18	0.28	0.17	0.3	0.22	0.17	0.18	0.14	0.21	0.11	0.26	0.12	0.35	0.49	0.4	0.58	0.21	0.24	0.87	0.22	0.86	0.43	0.59	0.25	0.25	0.44	0.3	0.49	0.42
100042235	100042235	Gm3739	0.51	0.36	0.21	0.11	0.1	0.27	0.3	0.19	0.23	0.11	0.19	0.25	0.18	0.52	0.15	0.37	0.18	0.19	0.29	0.36	0.27	0.14	0.39	0.49	0.34	0.19	0.52	0.08	0.17	0.41	0.79	0.6	0.33	0.18	0.15	0.43	0.51	0.3	0.37	0.18	0.33	0.38	0.28	0.82	0.23	0.64	0.27
70370	70370	Fbln7	6.52	8.74	12.03	15.04	13.44	7.34	5.1	4.88	7.11	13.77	9.94	8.13	4.36	3.04	3.23	17.11	8.69	6.31	5.34	4.88	8.02	15.26	6.94	7.45	8.1	10.11	13.68	19.74	10.06	10.31	10.15	14.71	18.88	25.3	20.49	11.74	8.82	7.68	11.37	22.91	16.74	12.44	6.85	4.77	4.87	29.16	13.1
26570	26570	Slc7a11	3.9	2.31	1.78	1.8	2.58	2.46	2.15	2.15	1.04	1.53	3.11	5.82	10.29	4.59	2.24	1.17	3.93	5.53	6.12	5.47	6.2	3.18	5.12	8.18	4.32	6.08	4.85	3.25	2.34	7.17	6.07	3.89	2.8	3.03	3.93	3.93	3.71	3.39	1.66	2.55	5.23	8.9	16.14	7.19	3.38	1.99	5.92
236219	236219	Tcstv3	0	0	0	0	0	0	0	0	0	0	0	0	0	0	0	0	0	0	0	0	0.06	0	0	0	0	0	0	0	0	0	0	0	0	0	0	0	0	0	0	0	0	0	0	0	0	0	0
380712	380712	Tlcd2	6.73	5.74	6.8	7.54	5.71	6.77	7.15	6.28	5.49	8.7	8.82	5.3	6.2	6.01	21.69	6.25	8.19	5.74	5.38	6.26	6.15	7.44	5.2	5.73	7.08	7.93	7.35	8.31	6.03	6.41	10.47	9.66	10.68	12.68	8.7	10.83	12.35	9.89	8.77	14.47	14.85	8.1	9.74	9.42	32.7	10.66	12.34
105440	105440	Kctd9	8.81	14.26	11.3	12.56	8.76	9.77	8.37	9.64	8.2	11.36	10.61	9.01	8.33	8.57	7.1	14.11	10.35	8.43	9.35	5.46	8.13	12.54	11.62	9.82	10.03	7.89	10.7	14.16	12.33	11.32	13.71	24.01	17.74	21.13	13.35	15.62	14.47	15.17	13.1	18.9	17.87	13.78	13.07	13.44	10.7	24.05	15.6
195531	195531	Zfp982	1.34	1.13	1.58	1.09	1.12	1.38	2.66	2.21	2.1	1.44	1.36	1.56	0.97	1	0.94	1.72	0.85	0.84	0.95	0.82	1.35	0.93	1.87	2.22	1.71	1.91	1.95	1.75	1.81	2.07	2.09	1.9	2.48	1.83	1.7	2.21	4.59	3.48	3.36	2.39	2.29	2.38	1.53	1.56	1.41	2.94	1.29
58226	58226	Cacna1h	3.01	0.97	0.37	0.76	1.16	3.29	18.05	2.89	16.44	0.52	0.52	1.31	3.2	5.09	3.75	0.9	1.25	4.44	2.27	3.44	2.04	2.42	5.05	4.64	3.61	4.55	3.11	1.24	5.24	1.77	4.68	1.63	0.59	1.28	1.76	5.26	31.19	4.55	26.28	0.87	0.88	2	5.03	7.98	5.66	1.54	1.89
217480	217480	Dgkb	0.15	0.52	0.11	0.5	0.23	1.77	11.7	0.35	7.61	0.29	0.06	0.22	0.22	0.3	1.69	0.33	0.26	0.72	0.1	0.19	0.11	0.28	0.19	1.6	0.38	1.59	0.28	0.13	2.1	0.14	0.24	0.88	0.18	0.85	0.36	2.83	20.22	0.55	12.16	0.48	0.11	0.34	0.35	0.48	2.55	0.56	0.38
22652	22652	Mkrn3	0.83	0.59	0.44	0.58	1	0.63	0.81	0.71	0.94	0.39	0.55	0.78	0.57	0.86	0.8	1.03	0.73	0.48	1.02	1.16	0.73	1.22	0.87	0.74	0.69	0.73	0.74	0.56	0.61	0.34	1.29	0.99	0.7	0.98	1.53	1	1.4	1.11	1.51	0.66	0.93	1.2	0.9	1.35	1.2	1.76	1.1
66536	66536	Nipsnap3b	14.74	14.82	11.93	13.89	14.29	12.82	12.72	12.79	11.95	16.51	21.1	11.57	13.86	14.37	26.39	12.01	12.43	14.59	14.79	28.82	18.17	14.66	17.34	18.01	15.2	25.71	14.4	15.48	14.32	17.01	22.94	24.94	18.72	23.37	21.78	20.5	21.97	20.13	19.1	27.48	35.54	17.69	21.75	22.54	39.79	20.47	18.75
381259	381259	Tmem237	6.12	8.42	6.51	6.28	5.59	5.77	9.69	5.81	9.22	7.27	8.2	6.43	9.07	7.9	6.07	6.35	6.65	8.13	7.37	8.74	8.06	8.69	8.96	7.87	6.48	6.05	7.66	8.54	8.01	7.13	9.52	14.17	10.21	10.56	8.52	9.24	16.73	9.15	14.74	12.1	13.8	9.83	14.24	12.39	9.15	10.82	10.03
50780	50780	Rgs3	29.01	23.33	18.36	22.15	25.93	26.02	35.51	29.06	31.77	29.23	21.79	19.97	31.68	33.54	23.98	18.96	18.82	22.29	24.26	51.85	32.62	36.51	42.77	28	25.25	39.92	24.84	26.49	25.09	36.9	45.14	39.27	28.82	37.26	39.52	41.62	61.35	45.76	50.78	48.64	36.69	30.54	49.72	52.59	36.14	32.31	28.38
93876	93876	Pcdhb5	0.83	0.91	0.43	0.61	0.75	0.91	1.05	1.06	0.53	0.86	0.68	0.49	0.94	0.81	0.56	0.63	0.5	0.54	0.67	1.51	0.77	1.07	0.74	1.16	1.17	1.25	0.93	0.84	0.7	0.87	1.3	1.53	0.67	1.02	1.15	1.45	1.81	1.67	0.85	1.44	1.14	0.75	1.47	1.27	0.84	1.07	0.75
109349	109349	Fam163b	0.09	0.02	0.03	0.03	0.06	0.04	0.05	0	0.13	0	0.01	0	0.03	0.09	0.02	0.03	0	0.08	0.01	0.05	0.02	0.03	0.19	0	0.02	0.11	0.2	0.13	0	0.07	0.14	0.03	0.05	0.05	0.1	0.07	0.09	0	0.2	0	0.03	0	0.05	0.14	0.02	0.05	0
15488	15488	Hsd17b4	41.37	32.79	31.35	27.79	36.75	35.76	44.58	39.49	41.93	32.59	33.14	34.69	39.56	40.8	70.93	34.4	34.53	37.21	35.57	44.51	34.32	37.18	44.58	38.63	40.01	39.66	37.88	38.7	36.73	34.64	64.38	55.2	49.2	46.75	56.02	57.2	77.03	62.19	67.01	54.22	55.81	53.06	62.08	63.97	106.93	58.63	52.05
213603	213603	Slc44a3	0.83	0.11	0.18	0.19	1.22	1.01	0.58	0.32	0.28	0.35	0.3	0.09	0.54	0.98	1.59	0.2	0.28	0.22	0.47	1.35	0.33	0.7	1.12	0.38	0.48	2.59	0.68	0.29	0.47	0.68	1.29	0.19	0.28	0.32	1.87	1.61	1	0.51	0.44	0.58	0.51	0.13	0.85	1.54	2.4	0.35	0.42
69165	69165	Cd209b	0.05	0.11	0	0.09	0.15	0.27	0.11	0.07	0.11	0.14	0.11	0.2	0.02	0.02	0.09	0.05	0.25	0.09	0.2	0.1	0.14	0	0.07	0.48	0.23	0.05	0.49	0.62	0.29	0.11	0.07	0.18	0	0.15	0.22	0.43	0.19	0.1	0.17	0.24	0.18	0.3	0.04	0.03	0.13	0.08	0.37
75125	75125	4930513O06Rik	0	0	0	0	0	0	0	0	0	0	0	0	0	0	0.21	0	0	0	0	0	0	0	0	0	0	0	0	0	0	0	0	0	0	0	0	0	0	0	0	0	0	0	0	0	0.32	0	0
210853	210853	Zfp947	0.99	0.88	0.58	0.52	0.84	0.84	1.12	0.91	0.96	0.5	0.88	0.79	1.41	0.85	0.81	0.83	1.01	0.79	0.7	1.23	1.11	0.96	1.12	0.8	1.23	1.21	0.94	1.15	0.36	0.82	1.54	1.48	0.92	0.88	1.28	1.34	1.93	1.43	1.53	0.83	1.48	1.2	2.21	1.34	1.21	1.41	1.52
20446	20446	St6galnac2	12.57	2.98	2.11	2.02	8.29	6.97	4.66	7.79	4.7	2.67	2.86	3.2	5.46	9.33	3.64	2.74	2.89	3.18	5.52	18.65	6.35	5.7	16.99	5.1	5.83	17.58	5.22	3.57	4.3	4.68	19.56	5.02	3.32	3.4	12.64	11.14	8.05	12.26	7.51	4.44	4.82	4.9	8.57	14.63	5.48	4.67	4.36
100764	100764	Rita1	4.21	3.36	3.2	3.8	3.73	4.27	5.3	3.7	5.7	4	3.99	3.26	3.85	3.78	4.06	3.58	3.56	3.63	3.34	4.54	3.54	3.95	4.17	4.15	4.44	4.63	3.86	4.16	3.71	4.11	6.54	5.66	5.03	6.39	5.69	6.82	9.16	5.82	9.11	6.65	6.72	4.99	6.03	5.92	6.13	6.1	5.36
192113	192113	Atp12a	0.17	0.05	0.04	0.06	0.06	0.11	0.14	0.05	0.12	0.05	0.28	0.03	1.09	0.66	0.13	0	0.08	0.06	0.26	0.6	0.18	0.3	0.21	0.09	1.07	0.13	1.02	0.07	0.7	0.11	0.27	0.09	0.06	0.1	0.09	0.17	0.25	0.08	0.18	0.08	0.47	0.05	1.7	1.04	0.2	0	0.12
229725	229725	Clcc1	15.68	14.68	14.38	15.49	12.92	13.58	16.36	14.13	16.31	14.85	16.45	14.6	12.94	13.89	18.97	16.57	13.53	14.67	13.03	13.94	12.78	15.51	16.01	15.37	14.89	14.32	15.36	16.54	14.48	16.59	24.41	24.72	22.58	26.05	19.69	21.72	28.26	22.24	26.06	24.72	27.71	22.34	20.3	21.78	28.6	28.23	20.4
74091	74091	Npl	5.17	5.89	6.33	5.58	5.06	7.33	5.43	5.39	5.86	16.09	10.57	5.47	5.65	5.24	4.2	5.93	5.47	7.33	4.08	8.36	6.68	5.65	4.92	11.34	7.82	6.64	6.05	12.02	5.05	7.9	8.05	9.91	9.94	9.4	7.71	11.72	9.38	8.49	9.37	26.78	17.81	8.37	8.86	8.21	6.33	10.1	8.25
72318	72318	Cyth4	27.2	25.37	34.53	36.21	23.34	22.31	28.72	23.56	21.18	44.48	71.06	32.54	41.65	25.83	23.11	27.96	30.95	42.24	38.01	47.79	50.22	30.29	32.8	61.38	41.92	40.71	41.67	49.15	31.94	43.33	42.33	42.71	54.19	60.91	35.58	35.69	49.63	37.09	33.86	74.02	119.67	49.77	65.36	40.5	34.85	47.64	46.66
18676	18676	Phf2	14.21	15.64	11.92	13.96	11.62	13.13	17.18	13.8	14.55	13.01	13.27	11.32	13.31	13.52	10.58	16.14	11.47	12.59	13.05	17.54	12.83	15.72	13.93	15.48	14.61	15.73	15.6	11.71	14.67	15.89	22.12	26.33	18.71	23.49	17.71	21	29.68	21.73	23.26	21.65	22.35	17.32	20.88	21.19	15.95	27.51	17.29
22402	22402	Ccn4	7.43	21.58	13.6	19.15	6.13	12.75	14.23	7.74	8.51	19.01	26.71	6.68	9.12	5.38	6.41	12.92	9.87	12.45	6.52	12.25	13.3	12.29	7.74	21.83	10.98	14.77	11.06	12.79	15.6	15.05	11.57	36.32	21.34	32.22	9.34	20.39	24.58	12.18	13.61	31.63	44.99	10.22	14.31	8.43	9.67	22.01	14.88
76854	76854	Gper1	0.98	0.99	1.24	0.92	0.97	1.09	1.6	1.2	1.19	1.16	1.32	0.8	0.66	1.04	0.61	1.42	0.86	0.79	0.62	1.81	0.9	1.12	0.98	1.05	0.85	1.6	0.79	0.76	0.98	0.8	1.53	1.67	1.95	1.54	1.47	1.75	2.76	1.89	1.91	1.93	2.22	1.22	1.03	1.63	0.92	2.42	1.3
238021	238021	Fscn2	0.33	0.16	0.21	0.02	0.38	0.22	0.12	0.33	0.03	0.1	0.03	0.03	0.04	0.16	0.05	0.03	0.1	0.18	0.16	0.16	0.08	0.14	0.13	0.05	0.1	0.2	0.08	0.13	0.1	0.07	0.52	0.26	0.33	0.04	0.57	0.36	0.21	0.52	0.05	0.17	0.04	0.04	0.06	0.25	0.08	0.05	0.16
191578	191578	Helq	2.63	2.23	1.88	2.35	2.61	2.39	3.08	2.86	3.54	2.09	2.38	2.51	2.68	2.59	2.24	2.54	2.46	2.08	2.86	3.32	3.08	3.31	3.16	2.17	2.59	2.11	2.28	2.14	2.36	2.33	4.09	3.75	2.95	3.95	3.98	3.83	5.31	4.5	5.67	3.48	4.01	3.84	4.21	4.06	3.37	4.34	3.71
13848	13848	Ephb6	4.58	2.23	1.69	1.86	2.36	3.24	5.15	3.35	4.25	3.4	3.52	1.58	1.66	2.38	1.91	1.31	1.58	2.19	1.95	5.24	2.7	1.69	2.99	3.63	3.38	5.05	2.32	2.25	2.53	3.13	7.12	3.76	2.65	3.14	3.59	5.18	8.91	5.27	6.79	5.66	5.93	2.42	2.6	3.73	2.88	2.24	2.38
102638882	102638882	Gm35339	0.73	0.71	0.79	0.65	0.79	0.81	1.1	0.93	1.07	0.57	0.58	0.74	0.74	0.94	0.85	0.65	0.58	0.38	0.82	1.16	0.86	0.77	0.69	0.79	0.86	1.19	0.72	0.66	0.68	0.76	1.14	1.19	1.24	1.09	1.21	1.3	1.9	1.47	1.71	0.94	0.98	1.13	1.17	1.48	1.28	1.11	0.88
319159	319159	H4c11	1.66	1.91	0.7	0.69	0.73	0.96	0.85	0.7	1.64	0.95	0.69	0	0.26	1.96	0.24	1.03	0.23	0.23	0	0.45	0.97	1.53	0.49	1.66	1.13	1.97	0.68	1.11	1.19	1.15	2.59	3.21	1.1	1.16	1.11	1.53	1.46	1.1	2.62	1.58	1.17	0	0.4	3.07	0.36	1.76	0.34
11722	11722	Amy1	20.54	12.12	19.95	10.49	18.51	16.94	6.29	10.69	12.11	10.87	8.3	19.75	12.25	16.28	51.54	9.71	14.88	11.89	19.12	0.83	10.46	5.66	7.95	5.7	13.93	1.54	12.36	10.24	10.06	7.51	31.96	20.41	31.31	17.65	28.21	27.1	10.87	16.84	19.35	18.08	13.98	30.2	19.23	25.53	77.7	16.54	22.44
77220	77220	Tmem200a	2.67	0.82	0.32	0.36	0.64	2.44	6.79	2.78	5.02	0.4	1.2	0.63	1.31	4.46	2.98	0.47	0.72	3.51	2.16	3.94	2.07	1.7	6.17	2.85	1.81	3.75	1.82	1.56	1.47	2.11	4.16	1.39	0.5	0.61	0.98	3.9	11.74	4.38	8.02	0.67	2.02	0.97	2.05	7	4.49	0.8	1.08
58994	58994	Smpd3	1.31	0.6	1.35	2.44	2.38	1.92	8.81	0.76	8.34	5.31	0.74	0.31	0.69	0.8	2.18	0.33	0.43	1.71	0.48	2.6	1.3	1.17	1.36	1.79	0.89	7.89	1.1	1.32	4.5	1.54	2.03	1.01	2.12	4.1	3.63	3.07	15.22	1.2	13.33	8.83	1.25	0.47	1.08	1.26	3.29	0.56	0.64
19183	19183	Psmc3ip	4	2.97	4.41	3.82	1.98	3.35	3.73	3.55	3.69	2.7	5.29	1.94	3.89	4.41	3.24	4.62	3.59	3.02	2.93	3.67	2.85	3.81	5.79	2.98	3.77	2.83	2.96	4.12	3.7	3.64	6.22	5	6.91	6.42	3.01	5.37	6.45	5.59	5.9	4.49	8.91	2.97	6.11	6.91	4.89	7.88	5.41
12362	12362	Casp1	8.99	4.98	6.47	7.84	6.21	7.23	4.42	5.98	5.18	12.49	13.75	6.87	10.55	9.03	7.7	5.62	7.36	9.69	9.17	15.83	11.23	7.39	11.31	14.76	10.77	19.95	11.07	13.53	9.09	13.14	13.99	8.38	10.15	13.19	9.46	11.57	7.64	9.42	8.28	20.79	23.16	10.5	16.56	14.16	11.61	9.58	11.09
17301	17301	Foxd2	0.16	0.27	0.34	0.23	0.18	0.32	0.26	0.42	0.27	0.31	0.49	0.23	0.21	0.17	0.11	0.31	0.32	0.33	0.17	0.33	0.25	0.24	0.18	0.34	0.16	0.22	0.33	0.26	0.19	0.36	0.25	0.46	0.53	0.39	0.28	0.51	0.46	0.67	0.43	0.51	0.83	0.36	0.34	0.26	0.17	0.53	0.49
13131	13131	Dab1	1.68	0.01	0.02	0.01	0.54	0.25	1.74	1.13	0.5	0.01	0	0.59	2.21	2.28	0.91	0.04	0.21	0.34	0.73	0.71	1.2	0.37	3.95	0.49	2.21	0.68	0.87	0.54	0.34	0.55	2.61	0.01	0.04	0.01	0.82	0.4	3	1.78	0.81	0.01	0	0.9	3.46	3.57	1.37	0.08	0.32
58988	58988	Rps6kb2	19.14	17.76	22.3	20.26	23.68	17.05	22.44	20.83	21.22	18.68	15.59	20.94	20.19	20.41	17.38	32.38	19.1	15.38	19.36	19.99	20.77	29.93	18.88	16.26	20.32	15.28	21.11	16.54	16.42	17.25	29.79	29.9	35.01	34.08	36.09	27.27	38.77	32.79	33.92	31.08	26.26	32.02	31.69	32	26.2	55.17	28.79
57908	57908	Zfp318	3.52	3.75	3.57	3.77	3.57	3.66	4.33	3.26	3.35	3.74	3.25	3.3	3.95	4.14	3.59	6.75	3.16	2.62	3.55	4.07	3.44	5.61	4.14	4.35	5.11	4.23	5.02	2.76	3.1	3.9	5.48	6.31	5.6	6.34	5.44	5.85	7.49	5.14	5.36	6.23	5.48	5.05	6.2	6.49	5.41	11.51	4.77
216154	216154	Med16	15.17	12.56	12.17	12.4	14.73	14.51	14.74	14	15.28	13.74	12.79	12.15	13.12	13.1	10.71	18.92	12.91	12.78	13.23	14.12	12.67	17.88	14.95	13.35	15.32	13.6	14.93	12.45	11.93	13.85	23.62	21.14	19.11	20.87	22.45	23.2	25.47	22.05	24.42	22.86	21.54	18.58	20.58	20.54	16.15	32.24	19.46
403187	403187	Opa3	16.34	14.14	17.45	16.61	16.27	16.49	13.16	15.88	14.77	14.46	13.04	17.18	14.68	14.41	13.45	16.95	15.54	15.86	13.74	9.49	12.43	13.78	17.83	13.87	16.92	12.02	19.47	15.48	16.86	14.65	25.43	23.81	27.39	27.94	24.8	26.38	22.75	25	23.61	24.06	21.96	26.28	23.04	22.6	20.28	28.88	23.43
272790	272790	Magee2	0.13	0.02	0.02	0.11	0.13	0.14	0.11	0.13	0.17	0.04	0.09	0.04	0.09	0.1	0.07	0.09	0.04	0.04	0.06	0.15	0.1	0.06	0.07	0.09	0.05	0.22	0.11	0.02	0.09	0.05	0.2	0.03	0.03	0.18	0.2	0.22	0.19	0.2	0.26	0.06	0.15	0.06	0.15	0.15	0.11	0.16	0.06
623898	623898	Gm6460	0.19	0	0	0.06	0.07	0	0	0.07	0	0	0	0.07	0	0	0	0	0	0	0	0	0	0	0	0	0	0	0	0	0	0	0.29	0	0	0.11	0.11	0	0	0.1	0	0	0	0.11	0	0	0	0	0
64435	64435	Fcamr	0.21	0	0	0.01	0.06	0.1	0.12	0.03	0.05	0	0.01	0.04	0.09	0.15	0.02	0	0.02	0.02	0.04	0.25	0.01	0.06	0.1	0.05	0.08	0.15	0.07	0	0.05	0.02	0.33	0	0	0.01	0.1	0.16	0.2	0.05	0.09	0	0.01	0.06	0.14	0.23	0.03	0	0.03
67270	67270	Mrpl42	211.57	150.3	210.16	155.39	227.02	201.68	124.76	205.65	182.07	148.64	126.72	245.78	184.91	222	162.77	157.58	212.63	201.93	227.96	69.35	166.52	130.81	164.63	102.28	174.29	74.85	142.98	181.03	167.92	129.73	329.26	253.03	329.88	261.41	346	322.6	215.55	323.8	291.01	247.32	213.41	375.93	290.17	348.11	245.38	268.54	320.56
14652	14652	Glp1r	0.09	0.06	0	0.03	0.03	0.09	0.25	0.15	0.24	0.06	0	0	0.03	0.16	0.12	0	0	0.03	0.07	0.66	0.26	0.1	0.16	0.15	0.3	0.34	0.06	0.06	0.03	0.09	0.14	0.1	0	0.05	0.05	0.14	0.44	0.24	0.39	0.1	0	0	0.05	0.25	0.19	0	0
108167320	108167320	LOC108167320	5.12	1.64	3.91	3.23	4.35	5.35	6.62	4.8	7.86	3.35	5.67	3.12	5.72	4.63	3.8	4.6	4.44	4.79	5.43	6.89	7.42	7.68	2.68	4.15	4.17	6.07	5.14	4.74	2.23	4.78	7.97	2.76	6.14	5.44	6.63	8.55	11.43	7.56	12.56	5.57	9.55	4.77	8.97	7.26	5.74	7.84	6.7
545975	545975	Cers3	0.54	0.01	0.04	0.02	0.41	0.24	0.07	0.17	0.1	0.06	0.02	0.03	0.08	0.34	0.12	0.05	0.08	0.04	0.11	0.69	0.17	0.19	0.39	0.13	0.09	0.66	0.11	0.01	0.04	0.07	0.84	0.02	0.06	0.04	0.62	0.39	0.13	0.27	0.16	0.1	0.04	0.04	0.12	0.54	0.17	0.09	0.12
103694	103694	Tmed4	58.57	51.09	44.68	43.37	56.05	49.39	47.83	53.68	53.62	43.46	41.55	50.47	45.98	50.29	45.76	48.46	50.77	51.08	52.79	63.46	53.62	53.02	44.56	42.62	49.29	54.11	45.86	50.17	44.22	46.93	91.15	86	70.13	72.96	85.42	79	82.65	84.53	85.7	72.31	69.97	77.19	72.15	78.86	68.98	82.58	76.54
21848	21848	Trim24	13.5	12.14	10.07	9.73	10.87	10.52	10.01	12.73	10.7	8.01	9.56	11.07	11.47	13.65	11.09	9.91	9.89	9.62	11.8	14.39	13.45	12	11.29	9.57	12.28	12.17	11.03	9.4	10.15	10.84	21.01	20.43	15.81	16.37	16.56	16.83	17.29	20.05	17.11	13.32	16.1	16.93	18	21.4	16.72	16.88	14.91
20504	20504	Slc17a1	0.19	0	0	0	0	0.02	0	0	0	0	0	0	0	0	2.04	0	0	0	0	0	0	0	0	0.02	0	0.02	0	0	0	0.19	0.29	0	0	0	0	0.03	0	0	0	0	0	0	0	0	3.07	0	0
171166	171166	Mcoln3	0.4	0.16	0.31	0.17	0.35	0.31	0.3	0.49	0.23	0.24	0.28	0.64	0.68	0.94	0.63	0.26	0.5	1.12	0.99	0.86	1.04	0.29	0.91	1.11	1.03	0.82	1.2	0.31	0.64	0.87	0.62	0.27	0.49	0.29	0.54	0.49	0.52	0.78	0.37	0.4	0.47	0.97	1.06	1.47	0.95	0.44	0.76
18130	18130	Ints6	3.55	5.06	3.98	4.32	3.29	3.49	6.29	4.36	4.18	4.3	5.26	2.96	4.12	5.09	4.21	4.62	3.3	3.74	4.28	5.36	4.56	4.52	6.08	5.76	5.22	5.84	5.59	3.57	4.83	5.18	5.53	8.51	6.25	7.27	5.02	5.58	10.86	6.87	6.68	7.15	8.85	4.53	6.47	7.98	6.35	7.86	4.98
109342	109342	Slc5a10	0.02	0	0.04	0	0.12	0	0.03	0.02	0.05	0.02	0	0.04	0.02	0	0	0.07	0.02	0	0.02	0.02	0.09	0.02	0.02	0	0.04	0	0	0	0	0.02	0.03	0	0.06	0	0.18	0	0.04	0.03	0.08	0.03	0	0.06	0.04	0	0	0.11	0.03
105245	105245	Txndc5	88.27	102.41	88.04	111.79	66.2	93.14	111.17	94.76	72.75	127.03	133.28	46.48	95.87	88.54	89.04	78.67	63.74	83.36	69.07	151.11	103.14	99.25	112.27	114.66	87.05	128.82	106.32	98.72	103.04	115.39	137.37	172.41	138.19	188.06	100.89	148.98	192.08	149.2	116.29	211.37	224.46	71.09	150.45	138.83	134.23	134.06	96.09
13164	13164	Dazl	0.1	0.07	0.11	0.08	0.12	0.1	0.02	0.1	0.09	0.04	0.11	0.1	0.12	0.11	0.07	0.09	0.2	0.06	0.05	0	0.12	0.08	0.08	0.04	0.16	0.01	0.07	0.04	0.09	0.03	0.15	0.12	0.18	0.14	0.18	0.15	0.03	0.15	0.15	0.07	0.18	0.16	0.19	0.17	0.11	0.15	0.3
225895	225895	Taf6l	5.5	5.44	4.94	5.33	5.11	4.94	4.5	5.18	4.51	5.74	5.56	5.7	5.63	5.36	4.19	7.93	4.96	5.03	5.73	7.24	5.7	7.45	5.15	5.47	6.61	5.63	5.78	5.59	4.9	5.25	8.56	9.16	7.76	8.97	7.78	7.9	7.78	8.16	7.2	9.56	9.37	8.72	8.83	8.4	6.32	13.52	7.48
13532	13532	Usp17lc	0	0.03	0	0	0	0	0	0	0	0	0	0	0	0	0	0	0	0	0	0	0	0	0	0	0	0	0	0	0	0	0	0.04	0	0	0	0	0	0	0	0	0	0	0	0	0	0	0
71323	71323	Rassf8	6.05	12.88	10.26	12.86	5.87	6.93	12.29	7.88	10.25	10.94	13.14	8.61	11.71	8.59	9.73	8.05	8.17	11.14	10.56	9.55	11.9	9.16	10.07	14.41	10.58	9.11	12.59	15.41	16.07	15.79	9.42	21.69	16.1	21.63	8.94	11.08	21.24	12.41	16.38	18.21	22.13	13.17	18.38	13.48	14.67	13.72	12.32
380698	380698	Obscn	42.86	36.13	55.56	38.79	50.07	40.99	11.1	42.11	26.43	29.58	21.57	61.98	36.26	39.32	24.89	57.63	46.94	33.96	41.58	0.05	26.34	34.93	36.08	25.82	48.63	4.3	52.24	28.09	33.36	32.12	66.7	60.83	87.22	65.25	76.31	65.57	19.18	66.3	42.24	49.21	36.32	94.8	56.91	61.66	37.52	98.22	70.77
76055	76055	Oga	31.26	28.68	24.5	25.04	26.9	27.09	34.45	24.59	33.67	24.04	25.11	26.59	29.42	27.85	22.86	33.36	26.37	26.02	27.7	39.86	31.01	34.1	31.89	28.95	28.97	34.64	26.89	24.56	25.56	26.21	48.65	48.29	38.45	42.12	41	43.33	59.52	38.72	53.81	40	42.28	40.67	46.16	43.67	34.47	56.84	39.75
27426	27426	Nagpa	14.44	13.18	10.15	13.04	10.99	11.87	16.34	12.86	12.54	16.34	20.43	10.82	13.56	12.09	11.87	9.82	8.75	13.55	8.91	17.21	14.52	12.84	13.15	16.38	15.27	18.38	14.53	15.3	14.07	15.2	22.47	22.18	15.93	21.94	16.74	18.99	28.23	20.25	20.05	27.19	34.41	16.55	21.28	18.96	17.9	16.74	13.19
54672	54672	Adgrg3	0.96	1.9	0.8	1.2	0.98	0.5	1.16	1.38	1.94	1.1	1.63	1.07	1.75	1.02	2.29	0.63	0.85	1.86	1.19	1.75	1.6	1.53	1.84	2.56	2.07	1.66	0.86	1.81	1.67	2.65	1.5	3.2	1.26	2.02	1.49	0.8	2.01	2.18	3.1	1.84	2.74	1.64	2.74	1.59	3.46	1.07	1.28
68961	68961	Phkg2	19.78	15.8	14.71	13.99	17.42	16.5	24.65	17.27	22.67	14.24	15.2	15.93	19.53	17.47	15.22	15.99	15.79	14.86	20.51	23.79	20.42	21.85	16.92	16.33	15.98	20.05	16.15	17.44	15.19	15.27	30.78	26.61	23.09	23.54	26.56	26.39	42.59	27.2	36.23	23.69	25.59	24.36	30.65	27.4	22.95	27.25	23.8
101966	101966	D8Ertd738e	214.55	209.08	226.6	205.47	225.95	209.52	196.2	199.5	243.37	202.19	193.89	214.31	215.58	200.67	190.26	200.51	238.93	214.22	224.4	212.75	225.32	230.29	185.78	164.67	173.49	177.86	162.37	247.59	202.03	198.86	333.9	351.99	355.68	345.65	344.37	335.12	338.99	314.12	388.99	336.43	326.53	327.79	338.3	314.67	286.83	341.7	360.2
68870	68870	Ak8	0.11	0.27	0.36	0.21	0.3	0.17	0.13	0.25	0.18	0.47	0.46	0.68	0.89	0.17	0.47	0.22	0.54	0.8	0.9	0.29	0.81	0.45	0.55	0.73	0.66	0.42	0.74	0.5	0.49	0.53	0.18	0.45	0.57	0.35	0.45	0.27	0.23	0.4	0.29	0.78	0.77	1.04	1.4	0.26	0.71	0.38	0.81
75641	75641	1700029I15Rik	0.34	0.35	0	0	1.04	0	0	0	0.74	0.34	0	0.34	0	0.34	0.34	0	0	0	0	1.27	0.36	0.71	0	0.68	0.32	1.07	0	0.32	1.02	0	0.53	0.59	0	0	1.59	0	0	0	1.19	0.57	0	0.52	0	0.53	0.51	0	0
17344	17344	Pias2	12.98	14.96	11.13	12.78	12.06	12.55	11.6	14.55	12.07	10.82	11.78	13.68	13	14.39	11.84	13.75	12.23	12.9	14	14.01	13.38	12.65	13.63	15.12	14.1	11.98	13.98	10.54	12.7	14.15	20.2	25.19	17.47	21.5	18.38	20.07	20.05	22.91	19.29	18	19.83	20.92	20.4	22.56	17.84	23.43	18.43
17164	17164	Mapkapk2	109.57	116.11	111.33	108.88	105.39	106.5	96.23	112.15	100.2	99	105.63	129.56	120	103.12	84.22	81.6	117.74	121.84	114.03	100.34	114.62	91.34	100.4	108.01	111.64	87.67	101.04	135.65	107.14	106.19	170.52	195.48	174.76	183.16	160.63	170.34	166.27	176.59	160.16	164.74	177.88	198.16	188.31	161.69	126.97	139.05	177.5
21985	21985	Tpd52	34.95	18.8	22.38	26.72	32.71	25.82	29.22	28.41	26.72	27.16	31.18	29.07	38.66	33.25	22.3	22.96	27.98	33.96	34.1	52.65	36.39	25.19	37.22	40.39	31.77	56.04	28.99	34.99	25.95	34.84	54.39	31.65	35.12	44.96	49.86	41.3	50.48	44.73	42.7	45.2	52.51	44.46	60.67	52.14	33.63	39.13	42.17
20491	20491	Sla	4.02	3.84	4.34	6.99	2.16	3.02	3.72	2.4	2.3	6.8	8.56	3.31	4.34	2.79	2.8	3.87	4.1	5.04	4.03	4.47	5.13	3.03	3.82	7.73	5.73	4.64	4.95	6.58	3.83	6.07	6.26	6.46	6.81	11.76	3.29	4.83	6.43	3.78	3.68	11.31	14.42	5.06	6.82	4.37	4.22	6.6	6.18
17977	17977	Ncoa1	3.84	3.42	3.27	3.83	3.56	4.17	4.66	3.85	4.36	3.8	2.98	3.3	3.93	3.4	3.22	5.85	3.53	3.38	3.69	3.86	3.4	4.74	4.53	4.41	4.92	3.94	5.11	3.39	3.74	4.66	5.98	5.76	5.13	6.44	5.43	6.66	8.05	6.06	6.97	6.33	5.01	5.05	6.17	5.34	4.86	9.96	5.33
66679	66679	Rae1	22.97	18.51	16.56	17.35	17.01	18.63	22.91	18.46	20.16	18.22	23.21	14.67	20.63	19.4	16.15	23.35	16.06	17.02	17.86	27.03	19.72	24.6	23.98	19.92	18.58	23.06	19.36	20.62	18.75	20.4	35.75	31.17	26	29.18	25.92	29.8	39.59	29.07	32.22	30.32	39.09	22.43	32.37	30.42	24.35	39.8	24.22
217246	217246	Ace3	0	0	0.03	0	0	0	0.03	0	0	0	0	0	0	0	0	0	0	0	0	0	0	0.03	0	0	0	0	0	0	0	0	0	0	0.05	0	0	0	0.05	0	0	0	0	0	0	0	0	0	0
241489	241489	Pde11a	0.06	0.04	0.07	0.15	0.07	0.05	0.07	0.03	0.08	0.09	0.06	0.04	0.04	0.04	0.04	0.22	0.05	0.05	0.04	0.06	0.06	0.14	0.04	0.15	0.09	0.07	0.14	0.08	0.06	0.09	0.09	0.07	0.11	0.25	0.11	0.08	0.12	0.05	0.13	0.14	0.09	0.07	0.06	0.07	0.06	0.38	0.08
100042784	100042784	Prdm11	1.06	0.71	0.32	0.44	0.56	0.88	1.55	0.84	1.12	0.73	0.69	0.4	1.05	1.02	0.6	0.64	0.61	0.76	0.6	1.16	0.86	0.88	1.69	1.34	1.58	1.09	1.26	0.77	0.83	0.93	1.65	1.2	0.51	0.74	0.85	1.41	2.68	1.32	1.78	1.22	1.17	0.62	1.64	1.6	0.9	1.09	0.92
207495	207495	Baiap2l2	1.61	0.75	1.37	0.85	1.82	1.29	1.07	1.71	1.35	1.03	0.49	2.03	0.37	1.06	1.12	0.86	1.83	1.09	1.34	0.7	0.83	1.69	0.67	0.52	1.46	0.91	0.51	0.67	0.93	0.81	2.51	1.26	2.15	1.44	2.77	2.07	1.85	2.69	2.16	1.71	0.82	3.1	0.58	1.66	1.68	1.47	2.76
80901	80901	Cxcr6	0.6	0.3	0.39	0.33	0.29	0.73	0.27	0.2	0.18	0.89	1.03	0.26	0.5	0.19	0.23	0.38	0.63	0.61	0.34	0.47	0.37	0.15	0.74	1.54	1	1.05	0.88	2.71	0.57	0.99	0.93	0.51	0.62	0.56	0.44	1.17	0.47	0.32	0.29	1.48	1.73	0.4	0.78	0.3	0.35	0.65	0.95
101142	101142	Itfg2	10.77	8.05	7.32	6.66	8.04	8.77	10.43	9.67	10	7.06	6.99	6.86	8.78	9.52	7.23	7.87	6.93	6.6	7.48	10.59	7.79	9.16	10.15	8.01	9.45	10.05	8.25	8.11	7.31	7.6	16.76	13.55	11.49	11.21	12.26	14.02	18.02	15.23	15.99	11.74	11.78	10.49	13.78	14.93	10.9	13.42	10.45
73689	73689	Bloc1s2	32.81	28.62	28.59	28.89	30.39	28.06	31.26	29.12	27.82	29.36	29.36	30.78	31.33	29.34	24.77	30.2	30.44	28.17	36.1	42.18	36.55	35.78	30.4	28.89	25.34	33.55	24.32	31.96	25.99	29.8	51.06	48.19	44.87	48.61	46.32	44.88	54.01	45.86	44.46	48.85	49.45	47.08	49.17	46.01	37.34	51.46	45.89
20088	20088	Rps24	768.48	601.69	630.11	576.07	672.1	660.02	694.46	745.54	805.77	643.83	666.52	644.85	751.74	732.18	621.09	555.48	733.71	675.78	857.94	932.28	860.98	960.02	684.84	534.23	592.09	719.53	512.59	598.05	570.49	678.65	1195.96	1012.95	989.06	969.1	1024.36	1055.7	1199.87	1173.89	1287.9	1071.31	1122.48	986.32	1179.65	1148.1	936.33	946.62	1106.11
15114	15114	Hap1	2.2	0.69	1.08	1.63	1.39	2.11	9.69	1.28	9.8	0.82	1.28	0.8	1.26	1.78	1.72	0.45	0.82	2.25	1.59	3.29	1.26	1.77	1.23	1.82	1.19	2.69	1.28	0.73	1.97	0.97	3.43	1.17	1.7	2.74	2.12	3.37	16.75	2.01	15.67	1.37	2.16	1.23	1.98	2.79	2.6	0.77	1.24
227580	227580	C1ql3	0.23	0.62	0.65	0.77	1.04	0.6	1.16	0.36	0.56	0.65	0.3	0.39	0.44	0.33	0.49	2.64	1.1	0.65	0.51	0.27	0.27	3.48	0.65	0.88	0.56	0.64	0.68	0.33	0.64	0.41	0.36	1.05	1.02	1.3	1.58	0.96	2.01	0.56	0.89	1.08	0.51	0.6	0.69	0.51	0.73	4.49	1.66
19376	19376	Rab34	33.99	34.86	21.93	26.38	20.65	30.19	40.96	29.17	33.57	33.01	32.66	17.23	29.3	31.3	21.29	21.98	21.85	24.12	25.49	42.28	30.48	32.92	31.35	32.87	30.59	34.11	30.05	38.57	30.76	33.21	52.91	58.68	34.42	44.37	31.47	48.3	70.76	45.92	53.66	54.93	55	26.36	45.98	49.09	32.09	37.46	32.95
75782	75782	Lca5	1.17	1.49	0.85	1.2	0.97	1.11	1.85	1.05	1.08	1.19	1.32	0.77	1.19	1.28	0.77	1.65	1.11	0.84	0.87	1.35	1.33	1.52	1.63	1.39	1.3	1.7	1.33	1.07	1	1.48	1.82	2.5	1.33	2.02	1.47	1.77	3.2	1.65	1.72	1.97	2.21	1.18	1.86	2.01	1.15	2.82	1.68
66162	66162	Bola2	132.17	132.7	120.33	129.48	134.82	122.54	126.31	135.04	145.82	136.86	162.98	147.52	174.51	152.9	106.92	135.23	162	158.02	185.75	182.65	170.01	198.55	131.24	126.6	129.29	122.61	121.56	149.89	128.83	113.6	205.69	223.4	188.87	217.82	205.49	196	218.24	212.63	233.07	227.72	274.47	225.64	273.85	239.76	161.18	230.46	244.23
66877	66877	Crnkl1	12.75	12.3	10.83	10.43	10.73	10.42	10.3	11.23	10.61	11.46	11.53	10.84	11.74	12.01	8.49	13.48	11.15	11.37	11.34	14.73	11.91	13.71	13.14	10.52	12.01	11.84	12.03	12.26	10.98	11.8	19.85	20.71	17	17.54	16.36	16.66	17.8	17.68	16.95	19.07	19.42	16.58	18.43	18.83	12.8	22.97	16.82
628779	628779	Hs3st4	0.05	0.02	0.01	0	0.02	0.03	0.57	0.09	0.39	0	0.04	0.11	0.09	0.22	0.05	0.03	0.04	0.12	0.19	0.16	0.07	0.04	0	0.14	0.22	0.08	0.1	0.03	0.22	0.02	0.08	0.03	0.02	0	0.03	0.05	0.99	0.14	0.63	0	0.06	0.17	0.14	0.34	0.08	0.05	0.05
98303	98303	D630023F18Rik	0.06	0	0.08	0.06	0.09	0.06	0.12	0.04	0.04	0.06	0.06	0	0.04	0.08	0	0.04	0.04	0.24	0.07	0.02	0.06	0.04	0.06	0.02	0.04	0.08	0.06	0.08	0.08	0.06	0.09	0	0.12	0.1	0.13	0.09	0.21	0.06	0.07	0.1	0.1	0	0.06	0.13	0	0.07	0.06
237082	237082	Nxt2	2.71	2.91	2.45	3.12	1.65	2.65	6.34	2.25	5.48	3.11	4.36	2.37	3.62	3.6	5.38	2.47	2.29	3.22	2.75	3.51	2.86	2.68	4.31	3.45	2.88	4.23	3.44	3.19	3.43	3.96	4.22	4.89	3.85	5.24	2.52	4.23	10.96	3.54	8.76	5.18	7.34	3.62	5.68	5.64	8.12	4.21	3.45
223337	223337	Ugt3a2	0	0.04	0	0.02	0	0	0	0	0	0	0	0	0	0.12	62.33	0	0	0.02	0	0	0	0	0	0	0	0	0	0.02	0	0.02	0	0.07	0	0.03	0	0	0	0	0	0	0	0	0	0.19	93.97	0	0
108169013	108169013	Gm46894	180.07	70.66	62.29	101.23	286.26	208.53	95.32	168.02	110.65	76.5	293.24	29.3	45.81	84.54	37.61	5.86	21.16	15.26	38.38	234.2	44.42	56.61	402.53	279.07	221.74	1424.57	237.04	103.92	104.12	274.68	280.24	118.96	97.77	170.29	436.29	333.55	164.69	264.55	176.85	127.29	493.84	44.82	71.89	132.57	56.7	9.99	31.91
11898	11898	Ass1	23.98	19.93	16.57	20.68	19.13	20.52	65.03	18.53	50.41	18.26	30.64	19.12	25.24	17.08	547.9	21.94	13.01	35.6	17	53.19	30.65	19.63	32.4	31.97	18.75	61.86	18.11	19.15	21.14	31.25	37.33	33.55	26.01	34.79	29.16	32.82	112.36	29.17	80.58	30.39	51.6	29.24	39.61	26.79	826	37.38	19.61
22122	22122	Tsta3	28.23	23.03	19.61	19.27	25.67	24.31	20.5	24.51	19.97	23.16	23.76	21.17	21.03	23.02	20.48	23.76	21.19	19.09	21.55	30.21	22.85	25.67	23.57	21.3	21.66	30.05	21.38	26.79	20.99	24.05	43.93	38.77	30.78	32.42	39.12	38.89	35.42	38.59	31.92	38.53	40.02	32.38	33	36.09	30.88	40.5	31.95
239796	239796	Mb21d2	5.7	8.02	5.63	6.68	5.83	5.16	6.1	5.67	6.44	5.15	5.43	5.21	5.28	5.82	6.13	8.47	5.39	4.81	6.1	5.19	5.1	8.72	5.72	5.09	5.03	4.17	4.94	7.68	6.01	7.01	8.86	13.5	8.84	11.23	8.89	8.26	10.54	8.92	10.3	8.57	9.14	7.98	8.29	9.12	9.24	14.44	8.12
27222	27222	Atp1a4	0.03	0.05	0.12	0.16	0.14	0.11	0	0.1	0.04	0.06	0.05	0.07	0.05	0.1	0.02	0.09	0.08	0.08	0.12	0	0.02	0.04	0.08	0.08	0.02	0.03	0.05	0	0.03	0.08	0.05	0.08	0.18	0.27	0.21	0.18	0	0.15	0.06	0.11	0.08	0.11	0.08	0.16	0.03	0.15	0.13
225997	225997	Trpm6	3.33	0.3	0.38	0.7	1.57	2.28	0.52	1.41	0.6	0.71	0.31	0.13	0.68	1.58	0.43	0.39	0.49	0.35	0.68	5.52	0.8	0.8	1.25	0.92	1.16	6.06	0.59	0.32	0.35	1.08	5.18	0.5	0.6	1.18	2.39	3.64	0.9	2.21	0.96	1.17	0.52	0.19	1.07	2.48	0.64	0.66	0.74
216792	216792	Iba57	3.15	3.46	3.76	3.26	3.64	3.47	2.15	3.1	2.72	3.6	3.45	4.52	3.21	3.2	3.21	4.88	2.92	2.57	3.02	2.21	3.1	3.55	2.98	2.59	3.64	2.92	3.96	3.6	3.02	2.99	4.91	5.82	5.9	5.48	5.54	5.55	3.71	4.88	4.35	5.99	5.82	6.92	5.04	5.02	4.84	8.31	4.4
50505	50505	Ercc4	2.92	2.74	2	2.47	2.61	2.52	3.33	2.47	2.89	2.27	2.8	2.04	2.65	2.59	2.04	3.16	2.26	2.38	2.16	3.19	2.55	3.05	3.14	2.91	2.91	3.29	3	2.52	2.58	2.46	4.54	4.61	3.14	4.15	3.98	4.04	5.76	3.89	4.63	3.77	4.72	3.11	4.16	4.06	3.07	5.38	3.4
229279	229279	Hnrnpa3	116.04	101.24	82.36	95.05	80.93	88.43	108.43	95.56	90.73	110.78	118.01	67.35	109.35	101.84	88.03	95.2	81.32	92.66	93	145.84	99.24	107.22	152.12	118.72	96.1	134.94	109.59	94.19	90.85	121.4	180.58	170.43	129.28	159.9	123.34	141.44	187.35	150.47	145.01	184.33	198.74	103.01	171.59	159.69	132.71	162.23	122.59
22789	22789	Zp3r	0	0	0	0	0	0	0.03	0	0.02	0.03	0	0	0	0	0	0.03	0	0	0	0	0	0	0	0	0	0	0	0	0.02	0	0	0	0	0	0	0	0.04	0	0.04	0.05	0	0	0	0	0	0.05	0
22340	22340	Vegfb	58.88	38.42	45.14	34.92	56.68	54.23	49.31	50.88	58.63	34.65	29.7	63.61	45.02	55.88	46.89	37.79	54.18	51.61	55.36	27.21	44.97	35.32	39.84	30.61	51.43	24.12	40.59	43.51	47.78	33.42	91.63	64.68	70.86	58.74	86.39	86.75	85.2	80.11	93.7	57.65	50.01	97.29	70.65	87.63	70.68	64.4	81.68
271305	271305	Phf21b	2.6	1.47	0.5	0.61	2.27	2.13	2.74	2.38	1.98	0.44	0.68	1.78	3.46	4.24	2.29	0.75	1.11	1.48	3.15	4.63	3.16	3.18	7.18	1.91	2.66	2.84	2.36	1.68	1.17	7.85	4.05	2.47	0.79	1.03	3.46	3.41	4.74	3.75	3.16	0.73	1.15	2.73	5.43	6.65	3.45	1.28	1.67
74125	74125	Armc8	9.06	7.83	8.07	8.14	8.41	8.71	9.91	9.09	11.53	7.65	7.2	9.85	9.05	8.73	6.92	11.51	9.85	7.96	9.1	7.74	7.89	10.12	9.07	7.64	8.68	7.04	8.58	8.28	8.34	8.01	14.1	13.18	12.67	13.69	12.81	13.94	17.12	14.32	18.43	12.72	12.13	15.06	14.21	13.68	10.43	19.62	14.85
215707	215707	Ccdc92	1.66	0.99	0.87	1.27	0.84	1.59	7.25	1.46	6.1	0.91	0.58	0.78	1.66	2.08	1.53	0.77	1.12	1.96	0.89	2.26	1.22	1.93	1.56	1.68	1.75	2.6	1.93	1.33	3.86	1.22	2.58	1.67	1.37	2.14	1.28	2.55	12.53	2.3	9.75	1.51	0.97	1.2	2.6	3.26	2.31	1.31	1.69
17076	17076	Ly75	1.33	2.25	0.58	0.8	0.59	0.8	1.49	1.25	0.87	0.92	1.26	0.99	1.92	1.57	1.06	0.52	0.86	1.81	1.78	2.23	2.21	1.11	1.75	2.17	1.57	1.76	1.94	0.92	1.35	1.95	2.08	3.78	0.91	1.34	0.89	1.28	2.57	1.97	1.39	1.53	2.12	1.51	3.01	2.46	1.6	0.89	1.3
75509	75509	1700020N15Rik	0.13	0	0	0	0.27	0	0	0	0	0	0	0	0	0	0	0	0	0	0	0	0	0	0	0	0.13	0.27	0	0	0	0	0.2	0	0	0	0.41	0	0	0	0	0	0	0	0	0	0	0	0
107976	107976	Babam2	27.51	28.11	28.08	28.85	31.07	27.93	25.75	26.15	24.45	28.9	30.16	30.25	30.71	26.71	24.54	41.4	30.98	29.04	27.84	29.81	29.29	34.85	27.5	27.14	27.66	25.18	27.1	29.28	23	27.18	42.82	47.32	44.08	48.54	47.36	44.68	44.48	41.17	39.08	48.08	50.79	46.27	48.19	41.88	37	70.55	46.71
18669	18669	Abcb1b	9.67	3.09	3.28	4.12	1.95	2.42	4.71	2.24	4.02	5.71	5.34	2.28	2.25	1.89	1.99	3.09	2	2.6	1.64	2.05	2.92	2.54	2.91	5.23	3.38	3.45	3.29	3.42	3.99	11.05	15.06	5.2	5.15	6.93	2.98	3.88	8.14	3.53	6.42	9.5	8.99	3.49	3.53	2.96	3	5.26	3.02
56332	56332	Amotl2	14.17	20.57	13.4	17.9	11.1	19.52	28.56	18.25	21.09	16.48	18.01	7.16	12.73	15.6	11.75	13.91	11.56	14.49	14.56	26.63	11.04	12.41	8.51	22.37	16.69	24.97	19.78	10.69	14.6	16.03	22.05	34.64	21.04	30.12	16.92	31.22	49.34	28.74	33.72	27.43	30.32	10.95	19.98	24.46	17.71	23.71	17.43
72309	72309	Tmem158	21.66	9.08	10.97	14.64	27.84	18.78	18.46	16.19	22.89	11.53	8.05	14.9	16.84	19.17	9.4	24.98	18.51	12.8	14.85	19.94	13.41	26.16	17.52	13.37	15.22	26.33	17.68	12.39	11.06	14.46	33.71	15.29	17.22	24.63	42.44	30.04	31.9	25.49	36.59	19.19	13.56	22.8	26.43	30.06	14.17	42.57	27.9
381306	381306	BC055324	1.25	1.11	1.08	1.31	0.7	0.95	1	1.19	1.15	1.25	2.03	0.52	1.41	1.61	0.73	0.84	0.8	1.03	1.22	2.12	1.65	1.2	1.76	1.46	1.09	1.31	1.32	1.18	0.84	1.34	1.95	1.86	1.7	2.2	1.06	1.52	1.73	1.87	1.84	2.08	3.42	0.8	2.21	2.53	1.11	1.44	1.2
12040	12040	Bckdhb	16.21	11.97	14.19	12.69	15.85	16.25	16.38	14.04	21.66	12.13	11.82	18.36	17.37	16.66	33.3	15.24	17.57	13.15	22.14	12.25	14.05	17.59	14.57	12.91	14.03	8.78	14.83	14.17	12.62	10.73	25.22	20.15	22.28	21.35	24.16	25.99	28.3	22.1	34.63	20.18	19.91	28.08	27.26	26.13	50.2	25.97	26.49
30878	30878	Apln	4.42	16.48	9.48	13.46	2.49	5.5	13.56	9.99	7.52	19.09	10.45	6.3	7.28	5.23	4.21	8.87	4.37	5.73	6.88	4.21	10.64	11.18	7.12	9.47	4.52	7.28	8.33	10.55	9.88	8.14	6.89	27.74	14.89	22.64	3.8	8.8	23.44	15.74	12.03	31.76	17.6	9.63	11.43	8.2	6.35	15.12	6.59
68617	68617	Mtcl1	1.58	0.99	1.41	1.32	1.79	1.72	3.77	1.3	4.58	1.41	0.61	1.22	0.92	1.13	0.91	3.88	1.39	1.46	0.95	1.56	1.4	2.62	1.36	1.25	1.46	1.92	1.24	0.77	1.2	1.34	2.46	1.67	2.21	2.22	2.73	2.75	6.51	2.05	7.32	2.35	1.03	1.87	1.44	1.78	1.37	6.61	2.1
16470	16470	Ush1g	0.08	0.09	0.06	0.07	0.23	0.1	0.03	0.03	0.09	0.09	0.07	0.3	0.09	0.04	0.18	0.16	0.13	0.15	0.1	0.01	0.07	0.08	0.18	0.06	0.14	0	0.05	0.03	0.05	0.05	0.12	0.15	0.1	0.13	0.35	0.16	0.05	0.04	0.14	0.14	0.13	0.45	0.15	0.06	0.28	0.27	0.2
66248	66248	Alg5	23.73	24.1	21.33	25.66	18.27	20.66	21.86	18.78	17.98	25.02	26.92	15.01	21.77	19.62	22.54	19.12	16.79	19.1	16.67	29.68	23.97	22.88	24.7	23.98	20.57	31.45	20.8	27.34	21.36	24.98	36.93	40.58	33.48	43.17	27.84	33.05	37.77	29.57	28.73	41.63	45.34	22.96	34.16	30.77	33.98	32.59	25.31
71673	71673	Rnf215	14.98	14.03	11.29	13.3	11.17	13.13	17.83	12.56	16.51	13.76	15.07	11.74	14.83	14.04	11.24	12.98	9.77	10.89	13.57	20.2	15.15	17.03	13.4	13.67	12.87	16.3	13.14	13.85	12.99	13.95	23.32	23.62	17.73	22.37	17.02	20.99	30.8	19.78	26.38	22.9	25.39	17.95	23.27	22.01	16.95	22.12	14.74
11973	11973	Atp6v1e1	104.69	120.15	117.31	107.13	123.76	108.2	93.78	104.56	113.39	108.63	121.85	150.78	148.6	120.52	111.48	159.09	154.09	154.79	149.23	125.22	148.55	137.83	113.5	117.63	120.56	116.92	121.32	139.61	114.31	142.74	162.93	202.28	184.14	180.22	188.63	173.06	162.03	164.64	181.24	180.75	205.2	230.62	233.19	188.98	168.06	271.1	232.3
12978	12978	Csf1r	31.31	45.22	43.85	72.97	22.71	31.1	34.09	26.45	24.66	78.86	98.04	36.62	41.39	24.35	27.83	45.14	34.51	50.14	34.48	41.58	53.66	30.77	32.21	75.02	52.35	38.73	53.71	72.73	40.57	53.08	48.72	76.13	68.82	122.76	34.62	49.75	58.9	41.65	39.41	131.23	165.1	56.01	64.95	38.18	41.95	76.93	52.03
22709	22709	Zfp51	2.84	3.63	3.13	3.17	3.06	2.63	3.27	2.99	2.24	2.67	3.35	3.43	3.06	3.13	2.37	3.23	3.19	2.73	3.39	3.26	3.63	2.58	3.86	2.97	3.28	3.61	3.29	3.63	3.2	3.38	4.42	6.12	4.92	5.33	4.66	4.21	5.65	4.71	3.59	4.44	5.64	5.25	4.8	4.91	3.58	5.51	4.81
20826	20826	Snu13	71.57	65.33	62.83	58.27	73.59	67.85	69.65	68.9	72.98	57.09	67.3	71.99	80.59	73.92	56.6	61.92	73.84	75.29	78.06	85.12	69.58	78.91	74.02	57.5	59.09	63.01	59.05	69.62	59.35	67.09	111.38	109.99	98.61	98.02	112.17	108.52	120.35	108.48	116.65	95	113.34	110.11	126.46	115.91	85.33	105.53	111.32
333789	333789	N4bp2	2.07	2.14	2.37	2.46	1.94	2.07	2.37	2.13	1.46	2.59	2.64	1.42	2.05	2.33	2.32	3.05	2.08	1.62	1.94	2.51	2.34	2.58	3.01	3.09	2.76	2.57	3	1.98	2.17	2.77	3.22	3.61	3.72	4.13	2.95	3.31	4.1	3.35	2.34	4.31	4.45	2.18	3.22	3.65	3.49	5.2	3.14
64294	64294	Itm2c	182.26	156.02	122.21	135.97	128.31	157.92	183.77	181.58	185.09	174.09	183.57	114.11	164.87	157.31	117.93	109.2	129.73	164.36	147.7	267.14	186.34	184.22	146.68	173.73	144.55	198.03	142.88	169.7	155.59	167.54	283.65	262.66	191.83	228.74	195.55	252.59	317.51	285.91	295.83	289.69	309.15	174.53	258.72	246.66	177.78	186.08	195.58
108014	108014	Srsf9	58.08	56.72	50.97	52.1	44.87	49.59	59.13	58.48	62.54	59.49	75.55	50.05	70.73	57.4	47.76	39.08	54.82	67.03	63.56	98.44	71.15	66.28	59	63.16	50.09	66.67	52.46	61.15	52.67	56.92	90.38	95.5	80	87.65	68.39	79.32	102.16	92.08	99.95	98.99	127.23	76.55	110.99	90.01	72	66.6	82.64
51886	51886	Fubp1	17.29	20.48	15.21	15.9	13.6	15.9	20.91	17.6	16.41	16.66	20.12	13.62	18.53	19.52	13.21	22.3	16.42	13.6	16.63	22.94	16.73	19.84	21.79	21.72	18.22	19.87	20.13	16.04	14.94	21.14	26.91	34.48	23.87	26.75	20.72	25.43	36.12	27.7	26.22	27.73	33.88	20.84	29.08	30.62	19.92	38.01	24.75
319776	319776	Tmem72	0	0	0	0.01	0	0	0.04	0	0	0	0	0.01	0	0	0.04	0.01	0.01	0.02	0	0	0	0	0.01	0	0	0	0	0	0	0	0	0	0	0.02	0	0	0.07	0	0	0	0	0.02	0	0	0.06	0.01	0.02
69752	69752	Zfp511	15.08	15.1	12.35	14.36	13.38	12.6	18.27	12.04	13.75	13.28	13.91	12.66	14.03	13.1	12.3	13.29	9.86	11.91	10.92	19.54	15.69	14.95	13.98	15.28	14.77	17.84	13.44	13.71	13.98	13.81	23.47	25.42	19.39	24.16	20.4	20.15	31.57	18.96	21.98	22.1	23.43	19.37	22.02	20.54	18.55	22.65	14.87
68750	68750	Rreb1	5.08	5.68	5.19	5.96	5.64	5.39	5.5	5.18	4.85	5.48	6.76	5.18	5.67	6.02	4.83	10.82	5.19	4.64	4.97	7.89	5.72	7.89	7.46	7.72	6.94	9.88	7.24	4.61	4.93	6.98	7.9	9.56	8.15	10.03	8.6	8.62	9.5	8.16	7.76	9.12	11.38	7.92	8.9	9.44	7.28	18.44	7.82
227334	227334	Usp40	6.03	5.97	5.91	5.79	5.25	5.96	6.51	5.6	5.36	6.25	6.58	4.79	5.75	5.86	5.66	7.47	4.47	4.86	5.39	7.59	6.43	7.03	7.4	6.77	6.69	8.1	6.93	5.75	5.17	6.58	9.39	10.06	9.28	9.74	8	9.54	11.24	8.81	8.56	10.4	11.09	7.32	9.02	9.18	8.53	12.72	6.75
59290	59290	Gpa33	2.45	0.02	0.02	0.02	0.81	0.93	0.04	0.93	0.04	0.02	0.05	0.02	0.1	0.67	0.5	0.02	0.45	0.19	0.32	7.51	1.35	0.21	0.45	0.61	0.62	4.61	0.15	0.03	0.05	0.37	3.82	0.03	0.03	0.03	1.23	1.48	0.07	1.46	0.06	0.03	0.08	0.03	0.16	1.05	0.76	0.03	0.67
231004	231004	Samd11	0.54	0.58	0.45	0.36	0.18	0.44	0.49	0.38	0.47	0.35	0.48	0.57	0.36	0.52	0.34	0.21	0.24	0.33	0.33	0.67	0.41	0.36	0.29	0.51	0.42	0.64	0.23	0.38	0.44	0.31	0.84	0.98	0.71	0.6	0.27	0.71	0.84	0.59	0.75	0.59	0.81	0.87	0.56	0.81	0.52	0.36	0.36
18796	18796	Plcb2	1.59	1.62	1.98	2.43	1.07	1.23	1.89	1.21	1.41	2.28	4.72	2.35	3.27	1.77	1.79	1.73	1.87	2.51	3.09	2.7	3.63	1.98	2.05	4.13	2.97	2.22	2.87	2.27	2.18	2.43	2.48	2.72	3.11	4.1	1.63	1.97	3.27	1.9	2.25	3.79	7.95	3.59	5.13	2.78	2.7	2.95	2.83
70235	70235	Poc1a	3.2	1.92	2.5	3.04	2.08	2.71	2.94	3.02	2.73	4.1	5.01	2.33	3.72	3.46	2.32	2.43	2.43	2.9	2.78	4.21	3.53	2.54	4.05	2.78	2.18	3.25	2.81	2.83	2.27	2.79	4.99	3.23	3.93	5.12	3.16	4.34	5.07	4.75	4.37	6.82	8.44	3.56	5.83	5.43	3.49	4.14	3.67
235505	235505	Cd109	3.23	28.47	6.72	18.39	3.41	3.96	6.53	5.39	4.91	9.96	9.81	3.47	5.13	5.77	3.12	7.89	4.15	4.5	3.88	5.32	6.42	9.62	5.92	6.08	4.14	5	4.98	15.94	13.32	12.26	5.03	47.93	10.55	30.93	5.2	6.34	11.28	8.48	7.85	16.57	16.52	5.3	8.05	9.05	4.7	13.44	6.26
74764	74764	Klc4	17.78	16.4	18.02	16.35	19.58	17.27	19.4	18.53	20.57	16.95	17.76	18.75	18.42	17.55	20.78	19.28	17.16	17.32	20.58	25.92	21.94	20.24	17.18	18.66	18.19	23.42	18.11	18.28	16.3	17.45	27.67	27.61	28.28	27.51	29.84	27.62	33.52	29.17	32.88	28.2	29.91	28.67	28.91	27.52	31.33	32.85	25.87
331529	331529	Gm5128	0	0	0	0	0	0	0	0	0	0	0	0	0	0	0	0.02	0	0	0	0	0	0	0	0	0	0	0	0	0	0	0	0	0	0	0	0	0	0	0	0	0	0	0	0	0	0.03	0
226778	226778	Mark1	9.7	8.36	2.64	3.62	4.46	7.63	10.66	9.39	8.13	4.08	4.39	5.8	7.13	7.72	5.22	3.16	4.24	5.17	7.22	18.52	9.32	7.99	6.19	6.87	7.59	9.75	6.31	4.47	5.33	6.65	15.09	14.07	4.14	6.09	6.79	12.2	18.42	14.79	12.99	6.79	7.4	8.88	11.19	12.11	7.87	5.39	6.39
74486	74486	Osbpl10	3.59	2.5	2.6	2.67	3.19	3.5	4.04	3.57	3.78	3.44	3.08	2.14	2.84	3.3	2.46	4	3.13	2.72	2.8	4.25	3.08	3.54	4.27	4.02	3.77	5.02	3.39	2.27	2.89	3.32	5.59	4.21	4.09	4.5	4.86	5.61	6.98	5.62	6.05	5.73	5.19	3.28	4.45	5.18	3.71	6.81	4.71
67064	67064	Chmp1b	20.49	21.82	16.5	17.81	19.21	16.72	18.99	17.31	16.83	17.66	19.48	17.45	20.43	20.46	16.47	17.18	18.77	18.49	19.03	28.26	22.69	19.86	20.49	21.8	20.12	26.63	19.06	21.49	19.91	22.18	31.89	36.73	25.89	29.97	29.28	26.74	32.8	27.26	26.89	29.38	32.8	26.68	32.06	32.08	24.82	29.27	28.29
329165	329165	Abi2	3.01	4.19	3.08	4.3	3.03	3.37	6.74	4.18	5.52	4.24	4.57	3.07	4.42	4.04	3.02	4.27	3.14	3.97	4.13	4.4	4.45	4.67	4.75	5.06	4.42	4.43	4.79	4.74	4.81	4.69	4.69	7.06	4.84	7.24	4.61	5.38	11.65	6.58	8.82	7.05	7.69	4.69	6.93	6.33	4.55	7.28	4.73
236792	236792	Mmgt1	10.08	10.51	9.25	9.39	8.87	9.77	10.48	9.71	10.25	8.47	9	9.42	9.49	9.65	7.73	8.4	9.02	9.33	9.38	10.46	8.45	7.61	10.84	8.98	10.06	9.24	9.93	8.37	9.31	9.74	15.68	17.69	14.53	15.8	13.51	15.62	18.12	15.29	16.38	14.1	15.15	14.41	14.89	15.13	11.65	14.32	13.6
104582	104582	Rprml	0	0.05	0.05	0.13	0.1	0.18	1.69	0	1.2	0.09	0.05	0	0	0	0.09	0.1	0	0.14	0	0.05	0.05	0	0.05	0.23	0	0.23	0	0.09	0.18	0	0	0.08	0.07	0.23	0.15	0.28	2.92	0	1.92	0.15	0.08	0	0	0	0.14	0.16	0
67480	67480	Cwc25	6.76	7.27	6.83	6.74	6.61	6.18	8.17	6.64	6.49	7.21	6.66	6.23	6.41	6.82	5.27	8.45	6.17	6.19	7.5	8.13	7.14	8	6.42	7.99	7.2	7.12	7.07	6.58	6.01	7.6	10.52	12.24	10.73	11.33	10.08	9.88	14.11	10.46	10.38	11.99	11.22	9.53	10.05	10.7	7.95	14.4	9.3
14311	14311	Cidec	0.23	1.71	1.43	0.35	0.7	1.32	0.24	0.71	0.26	1.72	3.9	0.48	0.51	0.16	0.78	0.48	0.71	0.77	0.27	1.06	0.19	0.16	0.47	3.96	0.91	0.51	2.54	4.49	0.89	1.25	0.36	2.89	2.24	0.59	1.07	2.11	0.42	1.12	0.42	2.85	6.57	0.74	0.79	0.25	1.17	0.82	1.07
17907	17907	Mylpf	5634.54	4429.03	9716.91	7981.02	8970.03	7243.51	1642.95	7836.83	4044.23	6059.19	2823.82	8807.52	5581.36	6352.11	4369.49	5707.54	11410.8	6501.95	7384.01	3.41	4586.57	5144.18	4097.01	2687.73	5733.34	486.02	5655.7	4929.34	5085.81	3075.23	8768.87	7456.32	15252.3	13426.1	13671.3	11586	2838.66	12339.5	6464.06	10082.3	4755.56	13471.4	8758.38	9960.46	6587.32	9726.46	17202.4
68209	68209	Rnaseh2c	67.2	52.13	50.67	46.41	54.84	55.85	53.7	59.34	55.69	52.09	55.43	50.47	56.32	57.03	60.85	47.22	49.48	51.96	50.56	64.28	57.75	58.53	56.23	47.54	49.96	53.61	48.26	66.74	46.74	55.52	104.58	87.76	79.53	78.07	83.58	89.33	92.79	93.43	89	86.67	93.35	77.19	88.38	89.43	91.74	80.47	74.59
399548	399548	Scn4b	56.26	39.97	42.33	26.5	50.17	52.59	10.18	54.9	40.75	16.89	21.98	58.57	44.14	48.32	32.93	6.84	45.84	42.98	54.21	0.16	32.47	6.56	32.74	21.59	43.95	4.16	36.6	31.45	46.38	28	87.56	67.29	66.44	44.58	76.46	84.12	17.6	86.45	65.12	28.11	37.02	89.58	69.27	75.77	49.64	11.66	69.11
211006	211006	Sepsecs	3.03	3.35	2.84	3.07	2.85	2.68	4.11	3.13	3.88	2.8	3.26	3.13	3.29	3.77	6.59	3.86	3.08	2.56	3.69	4.21	3.68	4.1	4.66	3.97	3.87	3.89	3.86	2.96	3.33	3.48	4.71	5.65	4.46	5.17	4.35	4.29	7.09	4.93	6.2	4.66	5.49	4.79	5.16	5.91	9.94	6.58	4.65
433766	433766	Trim63	50.91	73.03	78.61	54.35	71.83	53.99	11.21	71.33	34.19	50.46	29.28	69.9	34.22	42.06	32.14	124.31	70.26	48.4	44.31	4.68	33.7	64.95	33.55	26.06	52.29	6.32	35.78	49.78	40.15	43.08	79.23	122.94	123.39	91.43	109.48	86.35	19.37	112.32	54.65	83.96	49.3	106.91	53.7	65.95	48.45	211.85	105.92
229320	229320	Clrn1	0	0.01	0.01	0.04	0.03	0.01	0	0.01	0	0	0	0	0.03	0.02	0.01	0.05	0.06	0	0.02	0	0	0.05	0.03	0	0.01	0	0	0.01	0.01	0.01	0	0.02	0.02	0.07	0.04	0.02	0	0.02	0	0	0	0	0.04	0.02	0.02	0.08	0.09
19726	19726	Rfx3	0.69	0.8	0.78	0.64	0.63	0.72	1.02	0.8	0.78	0.61	0.49	0.65	0.72	0.89	0.69	1.03	0.63	0.5	0.73	0.74	0.77	0.79	0.76	0.76	0.96	0.76	0.83	0.5	0.6	0.74	1.08	1.35	1.22	1.08	0.97	1.15	1.76	1.26	1.24	1.01	0.83	0.99	1.13	1.4	1.05	1.75	0.95
12643	12643	Chad	0.21	0.19	0.08	0.61	0.77	0.33	0.03	0.1	0.06	1.1	0.1	0.06	0.05	0.22	0.64	1.34	0.05	0.08	0	0.19	0.03	2.23	0.21	0.11	0.08	0.97	0.1	0.15	0.16	0.18	0.33	0.31	0.13	1.03	1.17	0.53	0.05	0.16	0.1	1.83	0.17	0.08	0.09	0.35	0.97	2.29	0.08
233204	233204	Tbc1d17	23.18	18.64	20.75	18.22	23.15	21.27	19.33	21.54	23.12	19.7	18.5	21.5	19.39	22.43	21.13	25.7	20.11	18.99	20.26	21.39	22.3	25.68	16.92	18.27	20.28	19.7	17.02	21.01	17.47	17.8	36.08	31.39	32.57	30.66	35.28	34.02	33.4	33.92	36.96	32.79	31.16	32.88	30.42	35.17	31.85	43.79	30.31
231386	231386	Ythdc1	23.22	21.88	18.17	21.18	22.24	21.93	23.35	23.33	23.32	18.86	21.5	19.75	23.35	25.68	19.06	21.12	20.29	19.55	23.5	32.4	25.6	23.84	25.94	23.87	23.27	32.65	23.02	19.42	20.37	23.57	36.13	36.84	28.53	35.63	33.9	35.08	40.35	36.74	37.27	31.39	36.21	30.21	36.64	40.27	28.73	35.99	30.59
58804	58804	Cdc42ep5	20.35	12.96	16.53	17.87	23.88	20.68	22.21	19.13	17.51	23.38	21.87	12.64	17.56	17.23	14.45	15.73	14.28	17.31	15.46	37.58	19.73	25.66	22.52	17.66	14.49	31.78	17.44	19.49	16.91	17.05	31.67	21.81	25.94	30.06	36.4	33.07	38.37	30.12	27.98	38.9	36.83	19.33	27.55	27.02	21.78	26.8	21.52
19883	19883	Rora	5	3.8	5.05	4.19	4.51	4.56	2.86	5.19	3.73	4.19	3.36	5.89	4.19	4.13	4.2	6.9	4.22	4.05	4.53	1.54	4.19	4.85	2.97	3.94	4.76	2.31	4.32	2.99	3.36	3.7	7.78	6.39	7.92	7.05	6.87	7.29	4.94	8.18	5.96	6.97	5.65	9	6.57	6.48	6.34	11.77	6.36
20733	20733	Spint2	181.12	10.44	9.27	12.69	149.71	107.43	97.15	72.51	90.6	15.15	9.51	17.27	51.08	88.9	68.83	9.14	35.44	37.95	47.42	247.73	48.9	55.53	81.22	47.09	49.18	269.21	33.37	22.78	31.79	54.07	281.87	17.58	14.55	21.34	228.18	171.83	167.85	114.16	144.81	25.21	16.02	26.42	80.16	139.41	103.76	15.58	53.42
19386	19386	Ranbp2	12.21	14.51	11.32	12.34	10.76	11.92	14.55	11.66	12.23	12.25	13.44	10.96	12.81	13.23	10.26	18.02	12.21	11.87	11.94	14.68	12.68	15.38	15.71	15.8	14.46	14.74	15.04	9.68	13.07	15.28	19	24.42	17.77	20.75	16.39	19.07	25.14	18.36	19.54	20.38	22.64	16.76	20.1	20.74	15.46	30.71	18.41
634731	634731	Susd1	4.8	1.1	0.82	1.39	1.9	2.82	1.79	2.5	1.93	1.42	1.21	0.96	1.58	3.62	1.66	0.59	1.53	1.27	2.36	8.41	1.64	1.98	2.46	2.69	2.17	5.22	1.92	1.16	0.81	2.52	7.46	1.85	1.28	2.33	2.89	4.52	3.09	3.94	3.08	2.36	2.04	1.46	2.48	5.68	2.51	1.01	2.31
102636251	102636251	Gm33370	0.05	0.03	0.08	0.14	0.01	0.01	0.12	0.05	0.04	0.09	0.08	0.08	0.07	0.07	0.07	0.03	0.03	0.07	0	0.09	0.09	0.04	0.05	0.09	0.04	0.05	0.03	0.06	0.05	0.07	0.08	0.04	0.12	0.23	0.02	0.02	0.21	0.08	0.07	0.15	0.13	0.13	0.11	0.11	0.1	0.05	0.04
258571	258571	Olfr1033	16.57	28.75	25.34	36.26	12.1	22.84	48.64	15.11	39.62	48.82	39.65	17.01	25.42	12.03	22.5	15.84	17.06	25.79	14.47	21.48	32.45	17.58	13.18	42.35	25.77	39.69	20.3	32.17	34.03	31.6	25.78	48.39	39.78	61.01	18.44	36.53	84.04	23.79	63.32	81.23	66.77	26.02	39.88	18.86	33.92	26.99	25.72
18194	18194	Nsdhl	5.73	5.27	4.5	5.7	4.63	5.26	6.78	4.7	5.93	5.01	5.2	3.84	4.71	5.24	16.52	4.8	4.64	4.18	3.86	6.99	4.93	4.92	6.71	5.81	5.6	8.22	5.2	5.87	4.75	5.63	8.92	8.86	7.06	9.59	7.06	8.41	11.71	7.39	9.47	8.34	8.75	5.88	7.39	8.22	24.91	8.19	6.99
258289	258289	Olfr1324	0	0	0	0	0	0	0	0	0	0	0	0	0	0	0	0	0	0	0	0	0	0	0	0	0	0	0.05	0	0	0	0	0	0	0	0	0	0	0	0	0	0	0	0	0	0	0	0
70081	70081	Zfp995	2.03	1.47	1.54	1.85	1.85	1.8	2.26	1.74	2.21	1.98	2.25	1.65	2.05	1.86	2.03	1.37	1.78	1.65	1.77	2.98	2.28	2.01	2.1	1.99	2.49	2.3	1.48	1.92	1.64	1.59	3.16	2.47	2.41	3.11	2.82	2.88	3.91	2.74	3.53	3.3	3.79	2.53	3.22	2.92	3.06	2.34	2.68
68889	68889	Ubac2	21.02	15.74	17.73	15.59	18.94	19.26	20.32	18.48	19.72	17.44	18.78	18.03	18.74	18.14	18.89	18.89	17.15	18.24	18.44	22.27	18.99	18.8	17.46	17.71	18.62	17.45	16.61	19.69	17.76	18.46	32.71	26.5	27.84	26.23	28.86	30.81	35.11	29.1	31.53	29.02	31.62	27.57	29.4	28.44	28.48	32.2	25.86
14673	14673	Gna12	18.61	21.57	14.6	19.01	11.3	17.39	22.9	19.37	21.48	26.26	25.13	10.73	16.51	16.12	17.24	22.78	11.14	16.3	12.52	22.4	15.95	16.71	21.7	30.65	22.53	26.16	23.03	21.72	21.28	24.03	28.96	36.32	22.91	31.99	17.22	27.82	39.57	30.5	34.33	43.7	42.33	16.41	25.92	25.28	25.98	38.82	16.79
13839	13839	Epha5	0	0.01	0.01	0.04	0.01	0.07	0.95	0.01	0.67	0	0.01	0	0	0.05	0.03	0.02	0	0.15	0.02	0	0.02	0.02	0	0.08	0	0.05	0.03	0.01	0.1	0.05	0	0.02	0.02	0.07	0.02	0.11	1.64	0.02	1.06	0.01	0.02	0	0	0.07	0.04	0.03	0
52570	52570	Ccdc69	5.49	1.86	6.31	4.32	5.63	5.17	8.42	4.11	10.03	5.12	3.72	5.29	6.88	5.54	3.45	4.6	7.13	4.81	5.99	2.06	4.46	5.15	6.86	4.42	6.38	2.81	5.43	4.67	5.01	2.77	8.54	3.13	9.9	7.26	8.58	8.27	14.54	6.47	16.03	8.52	6.26	8.1	10.79	8.69	5.21	7.84	10.75
16150	16150	Ikbkb	21.92	17.37	15.58	17.91	18.2	17.97	22.78	19.11	20.67	17.34	19.98	15.88	20.43	19.87	16.59	18.07	16.55	15.84	22.04	31.47	22.65	21.44	19.6	23.51	20.69	26.37	19.32	15.88	16.31	20.89	34.12	29.25	24.45	30.13	27.74	28.74	39.36	30.09	33.04	28.85	33.64	24.29	32.06	31.16	25.02	30.79	24.95
66988	66988	Lap3	33.64	25.2	26.15	26.26	34.4	29.18	24.91	28.81	23.95	27.94	27.46	24.95	27.86	29.87	59.85	35.77	26.93	26.75	26.67	38.41	25.02	31.99	39.28	26.8	25.85	51.08	28.16	27.96	26.68	30.29	52.36	42.42	41.05	44.18	52.43	46.67	43.04	45.36	38.28	46.48	46.24	38.16	43.72	46.83	90.22	60.96	40.6
15936	15936	Ier2	34.72	27.56	22.57	26.69	28.9	29.1	23.16	26.21	27.68	27.2	28.93	23.74	33.43	31.23	25.62	23.68	27.45	28.79	26.9	49.62	31.41	37.93	27.13	31.42	29.73	42.04	26.47	29.89	28.49	32.01	54.03	46.4	35.42	44.9	44.04	46.54	40.01	41.27	44.24	45.26	48.71	36.3	52.46	48.97	38.62	40.36	41.38
14705	14705	Bscl2	24.84	32.62	26.26	27.96	23.12	27.19	31.24	26.16	33.07	35.4	41.42	27.79	30.71	25.88	31.03	23.33	27.15	33.66	28.27	33	34.54	27.41	29.83	34.25	28.13	31.04	29.98	42.89	33.53	36.72	38.65	54.92	41.21	47.04	35.24	43.5	53.97	41.19	52.85	58.91	69.76	42.5	48.18	40.59	46.77	39.76	40.93
71971	71971	Zswim1	3.61	2.85	3.1	2.63	3.35	3.18	3.97	3.54	5.07	3.05	2.72	3.05	3.82	3.14	2.5	3.88	3.41	3.34	2.75	3.54	3.19	3.63	3.97	3.36	2.67	3.02	3.52	3.18	3.15	3.59	5.62	4.79	4.86	4.42	5.11	5.09	6.85	5.57	8.1	5.07	4.58	4.67	6	4.92	3.77	6.62	5.14
66196	66196	Myo19	3.07	3.06	2.27	3.2	2.13	2.24	4.19	3.28	2.92	2.78	3.08	1.9	3.07	3.81	2.55	3.41	1.87	1.69	2.46	5.06	3.1	3.25	4.44	4.49	2.97	5.02	3.18	2.71	3.02	3.56	4.78	5.14	3.56	5.38	3.24	3.58	7.25	5.17	4.67	4.63	5.18	2.91	4.82	5.97	3.85	5.81	2.82
115487959	115487959	LOC115487959	0.09	0.02	0.05	0.02	0	0.05	0.04	0	0.08	0.03	0.02	0.02	0.02	0	0.05	0.04	0.04	0.04	0.06	0.02	0.02	0	0.04	0.02	0.02	0.02	0	0	0.02	0.02	0.14	0.03	0.08	0.03	0	0.08	0.07	0	0.13	0.06	0.03	0.03	0.03	0	0.08	0.06	0.05
78004	78004	Prr15	9.02	4.24	5.7	8.2	7.21	6.24	17.11	3.23	21.45	9.04	4.47	5.4	4.32	2.88	7.13	3.99	5.59	6.13	4.23	3.92	5.84	7.39	3.99	4.42	6.01	6.32	3.9	5.31	8.65	5.59	14.03	7.14	8.95	13.79	11	9.98	29.56	5.08	34.28	15.05	7.52	8.26	6.78	4.52	10.76	6.79	8.43
225659	225659	Cep76	2.35	2.76	3	2.62	2.83	2.52	2.75	2.75	2.61	2.57	2.8	3.11	3	3.18	2.13	4.58	3.38	2.98	3.06	3.15	2.63	3.66	3.14	2.79	3.14	2.52	3.27	2.64	2.89	2.7	3.66	4.65	4.7	4.41	4.32	4.03	4.75	4.34	4.18	4.27	4.71	4.76	4.71	4.98	3.22	7.81	5.09
16613	16613	Klk1b11	0	0.06	0.19	0	0	0.06	0	0	0.14	0.06	0.12	0	0	0	0	0	0	0.06	0	0	0	0.07	0.06	0	0.06	0.06	0.18	0	0	0.12	0	0.11	0.3	0	0	0.1	0	0	0.22	0.1	0.2	0	0	0	0	0	0
24132	24132	Zfp53	2.97	4.13	2.37	3.18	2.4	2.12	3.1	2.46	2.54	2.61	3.19	1.99	3.15	3.04	2.59	1.97	1.85	2.16	2.64	5.56	3.62	3.02	3.27	3.35	2.72	5.51	2.4	3.34	3.24	3.23	4.62	6.94	3.72	5.34	3.66	3.39	5.36	3.87	4.05	4.34	5.38	3.04	4.94	4.77	3.91	3.35	2.79
22276	22276	Uros	13.72	12.04	16.42	14.26	17.84	14.4	12.84	13.64	14.09	12.24	11.04	16.8	13.39	14.97	14.37	20.89	18.33	12.83	15.69	11.49	15.36	17.58	12.25	9.64	12.51	11.58	12.16	13.39	12.68	11.03	21.35	20.26	25.78	23.98	27.19	23.03	22.19	21.47	22.52	20.36	18.6	25.7	21.01	23.48	21.66	35.6	27.63
74251	74251	Ankrd9	21.41	17.98	33.14	26.06	33.85	24.1	11.86	29.94	23.79	14.19	12.01	27.93	21.85	21.9	11.57	11.65	29.23	23.39	26.32	3.79	15.31	9.97	11.33	11.04	15.93	3.52	13.65	12.65	18.57	11.58	33.32	30.26	52.01	43.84	51.6	38.55	20.49	47.14	38.02	23.61	20.23	42.73	34.29	34.34	17.44	19.85	44.07
69893	69893	Coa7	4.09	3.71	4.29	3.5	4.76	4.45	2.65	4.06	3.43	3.64	3.5	5.35	3.91	4.24	5.41	4.02	4.22	3.67	3.96	3.69	3.3	3.39	5.3	3.68	4.31	3.76	4.8	4.28	4.01	3.88	6.36	6.24	6.74	5.89	7.25	7.11	4.58	6.4	5.48	6.05	5.89	8.18	6.13	6.66	8.16	6.86	6.36
216134	216134	Pdxk	10.67	6.46	5.3	6.44	7.4	8.45	9.03	7.6	8.26	7.95	12.25	6.3	10.19	10.59	8.72	6.68	7.52	8.89	9.94	15.4	9.95	8.91	10.33	12.66	11.43	13.89	12.47	7.5	8.08	12.13	16.61	10.88	8.31	10.83	11.28	13.51	15.6	11.97	13.2	13.23	20.63	9.64	15.99	16.61	13.15	11.39	11.34
100504116	100504116	Brd3os	3.09	2.49	2.11	2.63	2.18	2.86	4.17	3.18	3.74	2.17	2.31	1.84	3.26	2.84	2.04	3.26	2.74	3.06	2.83	3.46	3.14	4.01	2.73	3.29	3.68	3.15	3.11	3	3.16	2.85	4.82	4.2	3.32	4.42	3.32	4.58	7.2	5.01	5.98	3.62	3.9	2.81	5.12	4.45	3.07	5.55	4.12
71238	71238	Sdhaf3	12.75	12.21	12.41	10.64	13.68	11.03	9.17	13.49	12.27	8.89	7.7	13.66	10.35	13.51	10.61	12.63	14.18	13.09	11.67	7.5	11.82	11.65	9.92	7.23	13.22	8.06	9.84	11.99	10.49	8.98	19.84	20.56	19.49	17.89	20.85	17.65	15.84	21.24	19.6	14.79	12.97	20.89	16.25	21.18	16	21.52	21.38
245533	245533	Awat1	0	0	0	0	0	0	0	0	0	0	0	0	0	0	0	0	0	0	0	0.03	0	0	0	0	0	0	0	0.03	0.03	0	0	0	0	0	0	0	0	0	0	0	0	0	0	0	0	0	0
408068	408068	Zfp738	1.74	1.6	1.08	1.26	1.02	1.39	2.2	1.57	1.26	1.25	1.41	1.14	1.48	1.61	1.32	1.52	1.31	1.37	1.47	2.15	1.87	1.83	1.81	2.19	2.15	1.97	1.88	1.33	1.54	1.75	2.71	2.7	1.69	2.12	1.56	2.23	3.8	2.48	2.01	2.07	2.37	1.74	2.33	2.53	1.99	2.59	1.97
16619	16619	Klk1b27	0.06	0.06	0.24	0.12	0	0	0.07	0.12	0	0.06	0	0.31	0.12	0.19	0.06	0.12	0.24	0.23	0.25	0.24	0.06	0.13	0	0	0.12	0.3	0.12	0.06	0	0.11	0.09	0.1	0.38	0.19	0	0	0.12	0.18	0	0.1	0	0.47	0.19	0.29	0.09	0.21	0.36
16485	16485	Kcna1	0.17	0.49	0.3	0.23	0.19	0.54	2	0.34	2.21	0.24	0.34	0.27	0.11	0.16	0.33	0.25	0.21	0.6	0.1	0.01	0.12	0.09	0.34	0.39	0.19	0.24	0.42	0.27	0.8	0.32	0.27	0.83	0.48	0.38	0.29	0.87	3.46	0.53	3.52	0.39	0.57	0.41	0.18	0.26	0.5	0.43	0.32
217304	217304	Cd300lb	4.69	6.5	6.5	7.98	4.42	4.95	7.03	5.65	2.97	9.11	14.42	12.22	18.49	9.36	7.76	5.89	10.18	17.13	14.84	11.74	19.39	7.38	13	22.54	14.85	10.66	16.57	12.46	11.13	15.35	7.29	10.95	10.2	13.42	6.73	7.92	12.15	8.9	4.75	15.16	24.28	18.7	29.01	14.67	11.7	10.04	15.35
224619	224619	Traf7	28.44	31.52	22.78	29.82	23.44	27.01	41.4	27.65	31.75	27.32	31.1	21.07	30.49	27.8	19.46	27.6	18.8	22.36	24.63	41.34	30.44	30.32	31.13	34.87	29.86	37.24	28.36	27.5	30.83	31.77	44.25	53.06	35.76	50.16	35.72	43.2	71.53	43.53	50.74	45.45	52.37	32.22	47.85	43.6	29.34	47.03	28.34
105245400	105245400	Gm40862	0.54	0.32	0.16	0.24	0.41	0.3	0.37	0.39	0.41	0.27	0.28	0.16	0.32	0.47	0.4	0.17	0.15	0.4	0.46	0.98	0.56	0.46	0.34	0.71	0.38	0.61	0.49	0.37	0.26	0.43	0.84	0.54	0.26	0.4	0.62	0.48	0.63	0.62	0.65	0.46	0.47	0.25	0.5	0.74	0.6	0.29	0.22
545288	545288	Cyp2c67	0	0	0	0	0	0	0	0	0	0	0	0	0	0.03	27.22	0	0	0	0	0	0	0	0	0	0	0	0	0	0	0	0	0	0	0	0	0	0	0	0	0	0	0	0	0.04	41.03	0	0
84653	84653	Hes7	0.08	0.16	0.28	0.57	0.26	0.1	0.26	0.09	0.2	0.3	0.33	0.22	0.18	0.12	0.13	0.39	0.21	0.21	0.35	0.22	0.28	0.46	0.11	0.2	0.37	0.15	0.26	0.33	0.26	0.15	0.13	0.28	0.44	0.95	0.4	0.16	0.44	0.14	0.32	0.5	0.56	0.34	0.29	0.18	0.19	0.66	0.32
115489386	115489386	LOC115489386	0	0.04	0	0.04	0	0	0	0	0	0.01	0.14	0	0	0.02	0.29	0	0	0.04	0	0	0.06	0	0	0.05	0	0.03	0	0	0	0.02	0	0.07	0	0.07	0	0	0	0	0	0.02	0.23	0	0	0.03	0.44	0	0
668208	668208	Gm13288	0.03	0	0	0	0	0	0	0.03	0	0.02	0.03	0	0	0.02	0	0	0	0.03	0.06	0.08	0	0	0.03	0.05	0.06	0.05	0.06	0	0	0	0.04	0	0	0	0	0	0	0.05	0	0.04	0.04	0	0	0.03	0	0	0
13830	13830	Stom	37.83	57.35	29.86	31.22	37.75	35.41	37.63	41.67	37.77	32.87	34.23	37.49	39.63	38.08	33.39	25.49	36.39	42.77	31.25	48.49	42.61	31.84	46.19	43.2	49.9	50.79	40.61	43.3	40.48	38.37	58.87	96.55	46.86	52.53	57.54	56.64	65.01	65.62	60.37	54.7	57.65	57.34	62.19	59.71	50.33	43.44	54.87
277343	277343	Wfdc8	0.62	0.04	0	0.01	0.03	0.22	0.05	0.09	0.02	0	0	0	0.06	0.1	0.02	0	0.03	0.02	0.04	1.01	0.22	0.02	0.02	0.09	0.19	0.34	0.02	0	0.02	0.04	0.96	0.07	0	0.02	0.05	0.35	0.08	0.15	0.03	0	0	0	0.09	0.16	0.03	0	0.05
14257	14257	Flt4	2.28	4.69	2.88	4.4	1.61	2	2.61	3.98	4.57	4.99	5	2.62	3.27	2.88	3.59	1.56	1.55	4.68	2.33	3.16	3.72	3.88	4.25	5.83	5.38	3.93	3.38	4.77	3.94	5.8	3.55	7.89	4.51	7.41	2.46	3.2	4.5	6.26	7.31	8.31	8.42	4.01	5.13	4.52	5.41	2.66	2.34
74386	74386	Rmi1	6.1	5.82	6.04	6.71	5.53	5.49	8.12	5.76	6.02	6.45	7.03	5.19	7.45	7.25	5.3	6.69	5.62	5.23	6.07	8.22	6.72	6.86	7.41	6.9	6.15	7.74	6.92	6.3	6.24	6.35	9.5	9.8	9.49	11.28	8.43	8.78	14.03	9.07	9.63	10.74	11.84	7.93	11.69	11.37	7.99	11.39	8.47
11877	11877	Arvcf	3.93	5.75	4.31	4.48	3.68	4.45	7.55	5.15	9.58	5.25	3.5	4.25	3.49	3.85	4.4	4.68	3.69	4.75	3.42	3.26	3.5	3.49	4.03	4.09	4.74	2.81	3.88	4.95	5.88	4.33	6.12	9.68	6.76	7.54	5.61	7.12	13.05	8.1	15.32	8.73	5.9	6.5	5.48	6.03	6.63	7.98	5.56
17005	17005	Ltk	0.59	0.04	0	0.09	0.22	0.5	2.25	0.31	2.07	0.04	0.06	0.04	0.22	0.46	0.22	0	0.13	0.56	0.24	1.2	0.17	0.24	0.23	0.39	0.31	0.66	0.11	0.11	0.24	0.27	0.91	0.06	0	0.15	0.33	0.81	3.89	0.5	3.3	0.06	0.09	0.06	0.34	0.72	0.33	0	0.2
545693	545693	Gm13043	0	0	0	0	0	0	0	0	0	0	0.03	0	0	0	0	0	0	0	0	0	0	0	0	0	0	0	0	0	0	0	0	0	0	0	0	0	0	0	0	0	0.05	0	0	0	0	0	0
66262	66262	Ing5	4.66	4.29	3.89	4.48	3.61	4.42	5.89	4.44	4.62	4.25	5.88	3.15	4.8	4.67	3.83	4.5	3.51	3.95	4.03	6.09	4.59	4.63	5.75	5.55	4.62	6.63	5.58	3.73	4.42	5.19	7.25	7.21	6.11	7.53	5.51	7.07	10.17	6.98	7.39	7.06	9.9	4.81	7.53	7.32	5.78	7.66	5.28
215303	215303	Camk1g	1.36	0.43	0.26	0.18	0.73	1.3	1	1.34	0.98	0.38	0.23	0.7	0.8	0.88	0.45	0.21	0.86	0.71	1.39	1.77	1.27	0.55	0.26	0.76	1.21	0.93	1.09	0.33	0.36	0.51	2.12	0.73	0.41	0.31	1.11	2.08	1.72	2.1	1.56	0.63	0.39	1.07	1.25	1.38	0.68	0.36	1.29
13214	13214	Defb1	5.71	0.12	0.06	0.17	0.71	0.44	0	0.17	0.26	0.06	0.17	0	0	0.06	2.2	0	0.06	0.22	0	0.12	0.06	0.12	0.47	0.4	0	3.04	0	0.06	0.06	1.52	8.89	0.19	0.09	0.28	1.09	0.7	0	0.27	0.41	0.09	0.28	0	0	0.09	3.32	0	0.09
225872	225872	Npas4	2.7	2.32	0.95	0.91	1.5	1.88	12.64	2.35	6.28	0.4	0.7	1.26	4.24	4.54	2.82	0.58	0.97	2.18	2.66	4.31	2.52	2.33	3.77	3.21	3.11	3.69	2.71	1.57	2.56	1.53	4.2	3.9	1.49	1.53	2.29	3.01	21.84	3.7	10.03	0.66	1.18	1.93	6.65	7.11	4.25	0.99	1.46
170460	170460	Stard5	13.43	10.55	7.25	8.68	10.48	10.95	16.35	10.73	12.96	9.88	12.11	9.58	13.06	11.9	26.35	7.16	8.18	12.2	13.58	19.16	15.41	13.1	11.82	14.5	11.71	18.38	11.1	12.36	10.27	13.99	20.91	17.76	11.38	14.61	15.97	17.51	28.25	16.89	20.71	16.45	20.4	14.65	20.49	18.65	39.72	12.21	12.34
57432	57432	Zc3h8	7.06	5.14	6.65	4.81	7.02	6.21	4.52	7.19	6.71	3.9	5.32	7.42	6.76	6.18	5.29	6.93	6.53	5.72	7.73	4.89	6.34	6.61	6.41	4.17	4.82	4.59	4.8	6.59	5.51	5.04	10.99	8.66	10.43	8.09	10.7	9.94	7.8	11.32	10.72	6.49	8.95	11.35	10.61	9.69	7.97	11.81	9.85
19171	19171	Psmb10	44.03	28.73	40.08	36.61	41.08	37.74	43.96	34.32	47.52	43.88	50.48	43.27	43.39	37.96	44.33	28.11	35.23	46.24	39.23	65.03	45.9	43.41	36.43	40.54	35.11	50.55	35.47	47.54	31.01	36.43	68.53	48.36	62.92	61.58	62.61	60.36	75.95	54.03	75.96	73.02	85.02	66.18	68.09	59.53	66.83	47.91	53.11
234686	234686	Fhod1	16.19	17.45	19.7	17.16	18.59	15.65	18.02	19.69	17	17.8	23.05	19.66	18.58	17.06	12.3	13.41	15.66	13.7	16.42	18.91	19.39	17.51	17.36	16.81	17.16	16.43	16.79	18.35	15.73	18.37	25.19	29.37	30.92	28.87	28.33	25.03	31.14	31	27.17	29.61	38.82	30.07	29.15	26.75	18.55	22.86	23.6
70823	70823	Hmgxb4	7.47	6.71	4.87	5.51	5.13	6.63	8.52	6.15	5.78	5.45	6.3	4.97	6.88	7.27	4.97	5.67	4.86	5.02	5.82	12.35	7.57	6.75	7.14	7.1	7.34	8.85	6.14	5.95	5.08	6.25	11.62	11.3	7.64	9.27	7.81	10.6	14.72	9.69	9.24	9.06	10.61	7.6	10.8	11.4	7.49	9.66	7.33
66253	66253	Aig1	13.13	16.39	15.55	18.73	17.14	14.1	21.39	15.23	18.67	19.2	17.98	16.45	17.85	17.13	17.66	17.56	16.36	19.17	16.45	20.57	20.58	18.18	15.93	18.62	16.37	18.64	15.12	17.64	17.36	17.31	20.43	27.58	24.41	31.51	26.12	22.55	36.96	23.99	29.85	31.95	30.29	25.16	28.02	26.87	26.62	29.93	24.66
22239	22239	Ugt8a	0.19	0.34	0.43	0.11	0.04	0.13	0.08	0.28	0.32	0.1	0.19	0.39	0.16	0.19	0.22	0	0.27	0.3	0.36	0.05	0.12	0.01	0.27	0.34	0.08	0.02	0.14	0.17	0.2	0.19	0.3	0.58	0.67	0.18	0.05	0.21	0.14	0.43	0.51	0.16	0.31	0.6	0.24	0.3	0.33	0	0.41
231805	231805	Pilra	3.42	3.86	4.95	5.12	2.57	2.98	3.89	2.68	2.68	5.57	8.74	5.94	8.99	3.11	3.72	3.49	4.18	7.48	5.13	7.37	9.1	3.29	3.9	8.81	6.85	6.34	5.34	8.27	3.56	7.24	5.32	6.5	7.77	8.61	3.92	4.77	6.72	4.22	4.29	9.27	14.72	9.09	14.1	4.87	5.61	5.95	6.3
20846	20846	Stat1	19.03	16.19	28.53	28.96	19.3	20.67	15.89	17.89	15.19	28.64	41.81	20.25	19.07	22	19.95	14.57	16.46	19.66	15.78	30.82	22.68	21.35	18.26	20.19	18.44	33.92	21.27	23.92	19.29	21.31	29.61	27.26	44.79	48.72	29.42	33.06	27.45	28.17	24.28	47.66	70.41	30.97	29.93	34.5	30.07	24.82	24.82
12873	12873	Cpa3	2.81	0.35	0.16	0.58	0.39	1.42	0.59	0.25	2.13	2.11	0.98	0.59	0.2	0.31	0.45	0.42	3.15	1.58	0.84	0.35	0.27	0.6	1.27	4.77	1.49	1.89	5.09	5.88	1.72	0.36	4.37	0.59	0.25	0.97	0.6	2.28	1.03	0.39	3.41	3.5	1.65	0.9	0.31	0.49	0.67	0.72	4.74
56030	56030	Tmem131	15.77	11.6	11.46	13.71	10.73	13.23	31.75	12.59	23.08	13.68	12.71	9.13	13.58	15.6	10.84	18.82	9.93	11.67	9.49	15.57	11.65	15.45	17.38	19.32	19.62	21.43	15.69	11	16.1	14.26	24.54	19.52	17.99	23.07	16.35	21.17	54.86	19.82	36.89	22.76	21.4	13.97	21.31	24.46	16.34	32.07	14.97
66126	66126	Elof1	64.75	55.6	48.58	50.71	53.63	55.72	51.1	53.81	55.29	54.82	62.67	48.6	51.28	56.42	52.75	44.52	48.02	52.81	54.04	67.83	53.84	53.39	55.66	50.35	49.35	63.14	47.28	57.98	50.96	54.61	100.77	93.61	76.25	85.31	81.74	89.12	88.28	84.72	88.38	91.23	105.55	74.34	80.46	88.47	79.52	75.86	72.4
100039973	100039973	Gm13309	0	0	0	0	0	0	0	0	0	0	0.26	1.1	0	0	0.96	0.57	0	0	0	0	0	0	0	0	0	0	0	0	0	0	0	0	0	0	0	0	0	0	0	0	0.44	1.68	0	0	1.45	0.97	0
56872	56872	Pate4	0	0.15	0	0.05	0	0	0	0	0	0.05	0.24	0	0	0.1	0	0	0	0	0	0	0	0	0	0	0	0	0	0	0	0	0	0.25	0	0.08	0	0	0	0	0	0.08	0.41	0	0	0.16	0	0	0
81003	81003	Trim23	7.78	6.64	7.76	6.91	7.06	7.27	7.74	7.3	7.37	5.94	6.51	8.45	7.74	8.94	5.86	10.36	8.54	6.81	7.97	5.53	7.72	9.16	7.14	6.24	7.82	5.84	7.46	6.87	6.42	6.22	12.11	11.19	12.18	11.63	10.75	11.64	13.37	11.5	11.77	9.89	10.96	12.93	12.15	14.01	8.83	17.66	12.88
232406	232406	BC035044	0.44	0.1	0.13	0.26	0.13	0.32	0.38	0.16	0.54	0.34	0.16	0.22	0.15	0.15	0.23	0.23	0.16	0.09	0.08	0.23	0.17	0.19	0.21	0.53	0.32	0.27	0.14	0.26	0.24	0.29	0.69	0.16	0.2	0.44	0.2	0.52	0.65	0.25	0.87	0.57	0.26	0.33	0.23	0.24	0.34	0.39	0.24
193796	193796	Kdm4b	8.3	6.88	6.62	7.06	7.61	7.54	8.91	7.95	8.68	7.32	6.63	5.58	7.23	7.67	6.29	10.19	6.29	5.96	6.07	8.07	6.5	8.09	7.55	8.4	8.4	9.75	8.19	6.89	7.16	7.58	12.92	11.58	10.38	11.87	11.6	12.06	15.39	12.52	13.87	12.18	11.16	8.53	11.34	12.03	9.48	17.37	9.49
11814	11814	Apoc3	0	0	0.14	0	0	0.13	0	0	0	0	0	0.19	0	1.45	2034.44	0.15	0	0	0	0	0	0	0	0	0	0	0.14	0	0	0	0	0	0.23	0	0	0.21	0	0	0	0	0	0.29	0	2.27	3067.06	0.25	0
384214	384214	Ephx4	2.02	0.41	0.95	0.72	1.81	1.48	1.56	0.7	1.59	0.95	0.3	0.29	0.6	1.27	0.77	4.01	1.26	0.61	0.71	2.46	0.8	1.86	0.64	0.89	1.01	3.3	0.75	0.74	0.76	0.97	3.14	0.69	1.49	1.21	2.76	2.36	2.7	1.1	2.54	1.57	0.5	0.44	0.95	2	1.16	6.84	1.9
56519	56519	Defb4	0.19	0	0	0	0	0	0	0	0	0	0	0	0	0	0	0	0	0	0	0	0	0	0	0	0	0	0	0	0	0	0.3	0	0	0	0	0	0	0	0	0	0	0	0	0	0	0	0
18102	18102	Nme1	78.37	81.22	73.63	68.26	71.88	71.25	67.67	81.45	86.6	70.61	90.41	76.76	91.2	78.71	70.74	62.2	84.03	85.22	88.13	116.99	91.04	99.15	87.41	69.24	65.75	75.31	67.95	89.76	71.01	82.8	121.97	136.73	115.57	114.83	109.56	113.97	116.92	128.24	138.41	117.49	152.26	117.41	143.11	123.42	106.65	105.99	126.69
106639	106639	Vmac	9.47	6.64	4.87	5.84	9.01	9.37	11.84	8.02	10.76	7.43	6.65	5.09	8.52	7.88	7.71	6.65	5.49	8.16	7.21	13.27	7.78	9.11	9.72	7.89	8.89	13.83	7.88	8.14	6.8	8.91	14.74	11.18	7.65	9.83	13.74	14.99	20.46	12.63	17.2	12.36	11.21	7.78	13.36	12.36	11.62	11.33	8.28
66680	66680	Oser1	31.42	29.06	30.99	30.05	28.76	27.54	28.36	29.57	29.24	27.55	30.36	30.71	28.77	28.99	24.63	29.52	29.96	28.22	32.74	31.4	29.19	32.09	29.12	24.91	27.58	25.62	24.48	27.6	27.1	27.07	48.91	48.93	48.64	50.55	43.84	44.06	49	46.56	46.74	45.85	51.13	46.98	45.14	45.46	37.13	50.3	45.16
27385	27385	Magel2	0	0	0.03	0.03	0.03	0.01	0.03	0	0	0.04	0.01	0	0	0	0	0.01	0.03	0.02	0	0.02	0	0.03	0.01	0.03	0	0	0.03	0	0	0.01	0	0	0.05	0.06	0.04	0.01	0.05	0	0	0.07	0.01	0	0	0	0	0.02	0.04
320865	320865	Cdh18	0	0	0.03	0	0	0.01	0.27	0.01	0.22	0	0.03	0	0.02	0	0.02	0	0	0.06	0	0.02	0	0	0.02	0.02	0.01	0.06	0.03	0	0.03	0.03	0	0	0.05	0	0	0.02	0.47	0.02	0.36	0	0.05	0	0.02	0	0.03	0	0
70750	70750	Kdsr	7.96	17.83	4.46	7.81	4.94	6.02	6.66	7.48	5.62	7.12	8.73	3.87	4.87	7.32	7.21	5.46	3.27	6.32	5.52	12.08	8.13	5.94	6.31	8.22	8.77	15.52	8.2	10.74	10.59	10.7	12.39	30.02	7	13.14	7.52	9.64	11.52	11.78	8.99	11.85	14.7	5.91	7.65	11.48	10.86	9.3	4.93
71617	71617	Armh3	6.74	5.8	5.73	5.63	7.11	6.73	6.79	6.17	7.14	6.67	6.48	5.8	5.77	6.33	4.97	8.32	5.92	5.78	6.62	6.5	6.36	6.92	7.02	5.8	7.29	6.55	6.87	5.45	5.64	6.14	10.48	9.77	9	9.48	10.84	10.76	11.73	9.72	11.41	11.11	10.92	8.87	9.06	9.93	7.5	14.18	8.93
19337	19337	Rab33a	0.79	0.9	0.04	0.52	0.33	0.64	0.59	0.46	0.7	0.63	0.6	0.17	0.46	0.39	0.38	0.29	0.64	0.2	0.39	0.73	0.95	0.31	0.73	0.5	0.53	0.87	0.57	0.43	0.54	0.35	1.22	1.51	0.06	0.88	0.5	1.02	1.01	0.72	1.12	1.04	1	0.26	0.72	0.61	0.57	0.5	0.97
77015	77015	Mpped2	0.44	0.64	0.55	0.95	0.94	0.52	0.78	0.26	1.23	0.62	0.84	0.84	0.45	0.37	0.76	1.25	0.96	1.17	1.49	0.25	0.41	1.24	0.98	0.75	0.54	0.24	0.57	0.71	0.67	0.63	0.68	1.08	0.86	1.6	1.43	0.83	1.35	0.41	1.97	1.03	1.42	1.28	0.7	0.58	1.15	2.13	1.44
66913	66913	Kdelr2	53.72	77.58	74.39	91.97	47.2	62.74	76.47	60.02	51.67	94.26	102.46	37.62	65.18	56.31	63.07	63.45	50.4	62.41	47.4	90.37	77.44	67.88	79.73	84.61	54.67	88.21	74.36	94.3	76.76	89.7	83.61	130.61	116.77	154.71	71.93	100.35	132.13	94.51	82.58	156.84	172.55	57.54	102.28	88.29	95.08	108.13	75.97
110197	110197	Dgkg	0.23	0.24	0.22	0.42	0.17	0.39	3.24	0.29	1.98	0.28	0.13	0.24	0.29	0.29	0.38	0.42	0.2	0.5	0.15	0.11	0.3	0.18	0.43	0.58	0.33	0.59	0.29	0.27	0.6	0.37	0.36	0.4	0.35	0.71	0.26	0.62	5.6	0.46	3.17	0.47	0.22	0.37	0.45	0.46	0.57	0.72	0.3
23802	23802	Amfr	43.83	45.45	46.08	45.79	39.55	42.09	49.96	45.27	48.98	43.03	40.72	46.08	42.04	44.99	59.88	46.78	41.26	46.36	44.22	41.58	41.82	40.95	44.54	45.75	45.12	39.89	44.27	50.08	48.98	45.91	68.2	76.51	72.33	77.03	60.29	67.32	86.33	71.28	78.28	71.61	68.58	70.48	65.96	70.55	90.27	79.72	62.21
67426	67426	Coq8a	148.13	170.98	215.72	146.33	252.31	197.92	51.27	152.35	157.54	126.08	99.75	294.37	153.66	160.43	185.91	217.83	253.24	174.73	192.32	2.64	128.19	141.5	141.24	104.65	208.6	28.26	183.83	165.25	159.83	143.72	230.53	287.84	338.61	246.17	384.54	316.58	88.59	239.89	251.8	209.79	167.99	450.25	241.12	251.57	280.28	371.22	381.77
50771	50771	Atp9b	15.74	16.62	13.38	15.61	13.81	14.77	20.47	14.65	19.04	14.39	16.31	13.93	17.21	16.35	13.86	13.1	12.44	14.53	15.98	22.88	17.92	17.1	16.62	17.41	15.56	18.95	14.72	16.08	13.88	16.68	24.49	27.99	21.01	26.26	21.05	23.62	35.36	23.07	30.43	23.94	27.47	21.3	27	25.64	20.89	22.33	18.75
73410	73410	1700065D16Rik	0	0	0	0	0	0	0	0	0	0	0	0	0	0	0.15	0	0	0	0	0	0	0	0	0	0	0.15	0	0	0	0	0	0	0	0	0	0	0	0	0	0	0	0	0	0	0.22	0	0
619297	619297	Ccdc194	0.09	0.24	0.1	0.18	0.22	0.23	0.28	0.12	0.11	0.21	0.12	0.15	0.37	0.28	0.12	0.22	0.22	0.19	0.13	0.25	0.2	0.38	0.24	0.31	0.23	0.12	0.35	0.26	0.31	0.18	0.15	0.4	0.15	0.31	0.34	0.37	0.49	0.18	0.17	0.35	0.19	0.23	0.58	0.43	0.18	0.38	0.33
67811	67811	Poldip2	43.01	37.17	38.03	36.34	44.01	42.38	34.91	40.63	36.13	37.37	37	38.69	36.52	40.24	42.34	52.22	44.03	37.83	39.81	34.21	33.83	44.81	40.26	33.95	40.41	31.78	37.97	42.82	34.91	36.32	66.94	62.58	59.7	61.14	67.08	67.78	60.31	63.97	57.75	62.18	62.31	59.18	57.31	63.09	63.83	89	66.37
227195	227195	Ino80d	2.66	2.99	2.97	3.18	2.7	2.74	3.77	2.95	3.27	2.79	2.98	2.77	3.47	3.26	2.29	3.29	2.77	2.51	3.05	3.97	3.41	3.48	3.3	4.01	3.52	3.73	3.4	2.18	2.82	3.33	4.14	5.04	4.67	5.34	4.11	4.38	6.51	4.65	5.23	4.65	5.01	4.23	5.45	5.1	3.46	5.6	4.18
70396	70396	Asnsd1	35.7	32.8	39.43	34.08	40.44	32.89	24.05	35.84	29.05	29.91	31.58	47.09	34.62	41.23	33.08	41.6	40.96	35.02	43.69	21.7	35.24	35.55	33.63	27.28	33.19	21.57	30.99	36.08	31.26	28.51	55.57	55.22	61.89	57.33	61.63	52.61	41.56	56.43	46.42	49.78	53.19	72.03	54.33	64.65	49.87	70.9	61.75
104360	104360	Isl2	0	0.07	0	0.02	0.02	0.02	0.22	0.01	0.72	0.18	0.09	0	0.02	0.01	0.02	0.25	0.02	0.14	0.03	0.02	0.01	0.25	0.02	0.14	0.05	0.02	0	0.02	0.09	0	0	0.12	0	0.04	0.04	0.04	0.39	0.02	1.16	0.3	0.15	0	0.04	0.02	0.04	0.43	0.04
13199	13199	Ddn	0.25	0.35	0.25	0.12	0.07	0.26	0.13	0.39	0.35	0.08	0.27	0.21	0.1	0.2	0.27	0.02	0.26	0.17	0.4	0.02	0.19	0.07	0.26	0.21	0.2	0.06	0.15	0.12	0.13	0.3	0.38	0.58	0.39	0.21	0.1	0.42	0.22	0.62	0.57	0.14	0.46	0.33	0.16	0.32	0.41	0.04	0.4
93679	93679	Trim8	21.57	22.77	23.27	23.57	21.92	22.06	26.53	22.56	24.08	26.92	30.37	20	25.6	21.47	18.63	28.91	23.02	27.07	23.43	28.91	27.19	27.61	21.51	28.18	24	27.46	23.84	21.41	24.81	25.26	33.57	38.34	36.52	39.66	33.41	35.29	45.83	35.53	38.48	44.8	51.15	30.58	40.17	33.66	28.08	49.27	34.7
238690	238690	Zfp458	0.32	0.28	0.2	0.19	0.33	0.24	0.29	0.35	0.25	0.19	0.29	0.28	0.3	0.25	0.77	0.34	0.18	0.2	0.21	0.47	0.34	0.21	0.4	0.44	0.5	0.5	0.31	0.3	0.31	0.36	0.5	0.47	0.31	0.31	0.5	0.39	0.49	0.54	0.39	0.31	0.49	0.43	0.47	0.39	1.16	0.57	0.27
54698	54698	Crtam	0.2	0.14	0.18	0.04	0.19	0.34	0.26	0.13	0.23	0.22	0.46	0.07	0.07	0	0.05	0.76	0.18	0.22	0.19	0.09	0.07	0.6	0.07	0.38	0.29	0.47	0.15	0.33	0.04	0.15	0.31	0.23	0.28	0.07	0.28	0.55	0.46	0.21	0.36	0.36	0.77	0.11	0.11	0	0.07	1.3	0.27
16633	16633	Klra2	1.25	2.06	4.17	4.71	0.97	1.17	2.78	1.25	1.79	3.02	5.16	2.28	3.23	1	2.31	1.08	1.51	2.43	1.72	2.66	3.15	1.34	1.12	3.02	1.69	2.11	1.76	2.8	1.73	2.35	1.95	3.47	6.54	7.92	1.48	1.86	4.79	1.96	2.87	5.03	8.7	3.49	5.07	1.57	3.49	1.84	2.27
20346	20346	Sema3a	2.93	2.22	1.62	1.45	1.76	2.39	5.28	4.04	2.86	2.02	1.82	1.5	3.35	4.18	2.8	1.57	1.73	3.44	2.45	4.4	3.7	3.38	7.18	3	2.73	3.55	2.99	2.87	3.23	3.57	4.57	3.74	2.55	2.44	2.68	3.83	9.12	6.36	4.57	3.36	3.06	2.29	5.25	6.55	4.22	2.67	2.6
26918	26918	Ern2	0	0	0	0	0	0	0	0	0.02	0	0	0.01	0	0	0.02	0	0	0	0	0	0	0	0.07	0	0	0	0	0	0	0	0	0	0	0	0	0	0	0	0.03	0	0	0.02	0	0	0.03	0	0
50850	50850	Spast	11.93	11.13	12.22	9.93	11.87	11.46	8.41	13.18	9.95	9.5	9.95	13.61	11.07	12.36	9.63	13.01	11.97	10.79	13.01	10.85	11.27	10.34	10.9	10.41	11.18	10.48	10.48	9.93	10.8	10.18	18.56	18.73	19.19	16.7	18.1	18.34	14.54	20.75	15.9	15.81	16.76	20.82	17.37	19.39	14.52	22.17	18.05
83492	83492	Gsdmc	0	0	0	0	0	0.03	0	0	0	0	0	0	0	0.02	0	0	0	0	0	0	0	0	0.02	0	0.02	0.02	0	0.02	0	0	0	0	0	0	0	0.05	0	0	0	0	0	0	0	0.03	0	0	0
76719	76719	Kansl1	11.42	13.57	8.43	11.14	8.09	10.37	13.54	11.06	9.99	10.73	11.29	7.77	10.4	11.31	8.52	11.24	7.98	8.88	9.21	14.85	11.31	10.66	12.1	14.26	13.19	15.23	12.46	10.7	10.98	12.53	17.78	22.85	13.23	18.73	12.32	16.59	23.4	17.42	15.97	17.86	19.01	11.88	16.31	17.73	12.84	19.15	12.03
102632737	102632737	Gm30732	0.16	0.12	0.06	0.18	0.18	0.05	0.1	0.1	0.04	0.06	0.24	0.05	0.17	0.05	0.04	0.11	0.1	0.02	0.05	0.19	0.1	0.11	0.12	0.18	0.14	0.45	0.05	0.06	0.06	0.09	0.25	0.2	0.09	0.3	0.28	0.07	0.17	0.16	0.06	0.09	0.4	0.07	0.27	0.08	0.05	0.19	0.14
228368	228368	Slc35c1	11.32	8.74	7.04	9.21	10.37	8.83	9.38	8.11	6.99	9.97	10.7	6.23	8.46	9.42	7.72	7.4	6.38	8.86	7.26	18.13	10.23	8.19	11.09	11.37	9.41	20.3	9.3	9.13	9.78	11.67	17.61	14.71	11.06	15.49	15.8	14.12	16.21	12.78	11.17	16.59	18.02	9.52	13.27	14.77	11.64	12.61	9.62
27176	27176	Rpl7a	1152.62	931.76	900.33	894.6	1015.53	946.96	1222.19	1094.78	1075.6	1001.28	1104.78	899.94	1150.66	1204.19	1028.84	968.93	897.34	1031.99	1077.29	1363.22	1240.33	1341.43	1215.51	933.16	967.04	1192.32	862.24	1008.63	956.02	1052.02	1793.8	1568.63	1413.21	1504.95	1547.78	1514.66	2111.67	1723.79	1719.17	1666.09	1860.55	1376.49	1805.64	1888.24	1551.04	1651.19	1352.79
80893	80893	Tmprss5	0.17	0.2	0.07	0.15	0.2	0.82	5.31	0.09	4.42	0.13	0.06	0.07	0.18	0.12	0.55	0.11	0.13	1.3	0.18	0.11	0.09	0.09	0.07	0.34	0.15	0.34	0.05	0.08	0.42	0.1	0.26	0.33	0.1	0.25	0.31	1.32	9.18	0.13	7.07	0.21	0.11	0.1	0.28	0.18	0.83	0.19	0.19
67493	67493	Mettl16	10.27	9.45	8.08	7.98	8.15	8.69	11.21	9.21	8.76	9.07	10.67	8.23	9.51	9.91	8.43	8.08	8.06	9	8.59	11.54	8.96	9.7	10.83	9.42	8.22	10.58	9.36	9.48	10.32	10.41	15.99	15.91	12.68	13.42	12.42	13.9	19.36	14.5	14.01	15.09	17.97	12.59	14.93	15.55	12.71	13.76	12.15
21463	21463	Tcp11	0.3	0.05	0.08	0.23	0.09	0.13	0.18	0.09	0.12	0.13	0.04	0.14	0.22	0.26	0.11	0.11	0.07	0.07	0.3	0.32	0.12	0.2	0.16	0.15	0.28	0.33	0.19	0.15	0.21	0.17	0.47	0.09	0.13	0.39	0.14	0.2	0.31	0.14	0.19	0.21	0.07	0.21	0.35	0.4	0.17	0.19	0.1
432964	432964	Iqank1	0.27	0.52	0.15	0.11	0.08	0.13	0.08	0.25	0.27	0.21	0.19	0.18	0.18	0.22	0.22	0.37	0.19	0.06	0.13	0.32	0.19	0.18	0.18	0.24	0.17	0.45	0.25	0.25	0.12	0.32	0.43	0.87	0.23	0.19	0.12	0.21	0.15	0.4	0.43	0.35	0.33	0.27	0.29	0.34	0.33	0.62	0.29
238692	238692	Zfp874a	3.04	3.65	2.9	3.56	3.51	3	3.98	3.55	3.77	2.5	3.44	3.27	3.63	4.05	4.43	3.05	3.12	3.08	3.36	4.06	3.85	3.91	3.02	3.92	3.57	4.11	2.85	3.67	3.39	3.35	4.73	6.15	4.56	5.99	5.34	4.79	6.88	5.59	6.03	4.15	5.8	5	5.7	6.34	6.68	5.2	4.7
269614	269614	Pank4	12.95	10.75	12.98	10.67	11.55	11.45	14.65	11.2	14.7	10.46	10.21	12.17	11.86	12.94	10.26	12.51	9.53	9.68	12.66	11.34	11.74	13.34	12.25	10.41	11.96	9.11	11.96	11.53	11.79	10.75	20.15	18.09	20.38	17.95	17.6	18.31	25.31	17.64	23.5	17.4	17.2	18.62	18.62	20.29	15.47	21.32	14.37
102580	102580	Alg9	7.34	6.49	6.2	6.63	6.27	6.64	6.6	6.39	6.37	8.3	9.52	5.09	6.28	7.35	6.44	6.85	6.16	6.62	5.39	10.07	6.45	7.14	8.02	7.94	6.42	10.74	6.07	7.97	6.54	8.11	11.42	10.92	9.73	11.15	9.56	10.62	11.4	10.06	10.18	13.81	16.03	7.79	9.86	11.52	9.7	11.68	9.29
67434	67434	Ankrd33b	4.85	3.76	5.9	4.38	4.39	4.48	1.65	4.99	2.54	4.35	3.23	6.97	5.8	4.04	4.68	2.93	5.83	4.39	5.56	2.2	4.31	3.84	3.46	4.85	4.79	1.4	4.16	4.09	3.76	4.83	7.55	6.34	9.26	7.36	6.69	7.17	2.85	7.85	4.05	7.24	5.44	10.66	9.09	6.34	7.06	4.99	8.79
13009	13009	Csrp3	120.55	247.78	429.41	422.19	439.6	249.4	101.66	487.6	170.91	395.89	177.95	578.86	258	266.96	189.47	709.28	482.25	248.95	321.96	0.06	188.19	299.41	412.78	142.83	343.81	77.02	398.42	827.2	184.27	366.7	187.6	417.14	674.03	710.23	670	398.92	175.64	767.75	273.17	658.75	299.68	885.39	404.86	418.61	285.63	1208.71	727.01
546611	546611	Klhl33	20.98	11.41	19.13	12.45	16.34	15.3	4.24	13.77	13.57	6.81	8.88	16.34	13.16	15.69	12.37	8.32	17.65	12.86	15.47	0.61	7.97	11.37	5.76	7.33	12.68	0.92	7.04	5.89	11.32	6.24	32.66	19.21	30.02	20.94	24.9	24.47	7.33	21.68	21.69	11.33	14.96	24.99	20.65	24.6	18.65	14.18	26.61
66665	66665	Msantd3	13.26	12.99	10.84	11.74	12.43	11.19	12.17	13.73	12.47	10.16	10.77	13.65	12.48	11.54	7.51	14.34	13.4	13.61	14.34	15.61	12.79	15.23	11.97	9.88	11.61	10.73	11.23	11.03	10.86	11.51	20.63	21.87	17.02	19.75	18.95	17.9	21.03	21.62	19.93	16.9	18.14	20.88	19.58	18.09	11.33	24.44	20.2
236511	236511	Ago1	8.69	6	4.71	5.81	6.03	7.98	10.57	7.79	8.57	6.21	7.37	5.69	7.9	8.11	6.51	6.18	5.86	6.55	7.16	13.4	8.03	7.95	9.66	9.51	9.01	12.28	8.2	5.64	6.36	7.62	13.53	10.11	7.4	9.77	9.19	12.76	18.26	12.27	13.7	10.34	12.41	8.71	12.4	12.72	9.81	10.52	8.83
21808	21808	Tgfb2	10.93	12.02	10.61	12.63	9.84	15.03	13.4	9.79	10.28	14.74	9.98	8.97	9.33	8.27	6.75	9.61	10.16	10.61	8.56	13.55	10.72	11.02	10.52	11.04	12.99	13.97	10.45	11.19	12.76	15.25	17.01	20.24	16.65	21.25	14.99	24.04	23.16	15.41	16.43	24.52	16.82	13.71	14.63	12.97	10.18	16.39	15.31
27993	27993	Imp4	10.41	9.08	8.18	10.29	8.75	9.61	10.25	9.08	8.21	11.22	14.65	7.6	10.3	9.95	9	10.18	6.76	8.49	8.21	13.99	11.21	11.09	12.45	12.23	9.71	13.25	11	10.65	9.8	13.14	16.21	15.28	12.83	17.31	13.34	15.37	17.7	14.29	13.12	18.67	24.67	11.63	16.17	15.6	13.56	17.35	10.2
74229	74229	Paqr8	2.88	1.61	0.92	1.47	1.96	2.33	8.14	2.51	7.01	1.34	1.44	1.14	1.54	2.08	1.92	1.68	1.44	3.6	1.24	5.31	1.89	1.57	2.22	2.88	1.91	5.22	1.64	1.27	3.04	1.61	4.48	2.71	1.45	2.48	2.98	3.73	14.06	3.95	11.21	2.24	2.42	1.74	2.42	3.25	2.9	2.86	2.18
217201	217201	Rundc1	8.86	8.29	8.12	8.12	9.15	8.04	10.57	7.56	9.41	7.99	7.77	7.63	8.76	8.89	7.01	10.14	7.63	7.5	9.45	11.13	9.15	10.24	8.65	8.38	9.2	9.57	8.71	8.15	8.23	9.03	13.79	13.95	12.74	13.66	13.94	12.86	18.25	11.9	15.04	13.3	13.08	11.67	13.74	13.94	10.57	17.28	11.51
20686	20686	Spa17	3.68	4.33	4.06	3.93	3.37	3.39	3.42	3.55	5.82	4.51	3.07	6	4.31	5.83	4.2	2.89	6.91	4.22	5.49	1.75	4.47	2.85	3.68	2.16	3.82	2.3	3.11	4.43	3.27	3.98	5.72	7.29	6.37	6.61	5.13	5.42	5.9	5.59	9.3	7.5	5.17	9.18	6.76	9.14	6.34	4.92	10.41
234564	234564	Ces1f	0.09	0	0.07	0.02	0.14	0.04	0.03	0.04	0	0.04	0.2	0.05	0.07	0.07	67.45	0.12	0	0.09	0.02	0.14	0	0.02	0.05	0.18	0	0.16	0.02	0.02	0.02	0.02	0.14	0	0.11	0.04	0.22	0.07	0.05	0.07	0	0.07	0.33	0.07	0.11	0.11	101.69	0.2	0
53419	53419	Corin	0.11	3.11	0.03	2.16	0.02	0.02	0.02	0.13	0.01	0.09	0.13	0.01	0.06	0.02	0.07	0.02	0.03	0.03	0.03	0.04	0.04	0.02	0.01	0.06	0.14	0.03	0.01	0.8	0.89	0.79	0.17	5.24	0.04	3.64	0.03	0.03	0.03	0.21	0.02	0.15	0.21	0.01	0.1	0.03	0.1	0.03	0.04
218035	218035	Vps41	19.89	17.25	15.54	16.04	15.48	18.42	20.59	18.31	18.68	17.81	18.05	16.91	17.2	17.59	16.47	18.15	16.27	17.65	16.43	21.58	17.71	19.57	17.89	19.18	20.27	20.17	17.85	17.32	17.82	18.34	30.95	29.04	24.4	26.98	23.6	29.46	35.57	28.82	29.86	29.64	30.39	25.86	26.99	27.59	24.83	30.93	24.53
20016	20016	Polr1c	43.45	33.12	29.52	32.43	34.77	34.68	36.85	40.02	37.09	33.62	37.08	30.2	37.21	37.56	31.51	34.4	31.15	33.5	36.74	48.44	40.25	45.87	36.32	34.86	32.64	44.76	33.97	36.24	30.79	36.31	67.62	55.76	46.34	54.55	53	55.47	63.67	63.01	59.28	55.94	62.45	46.2	58.4	58.9	47.5	58.62	46.97
26403	26403	Map3k11	16.4	17.21	15.93	15.27	13.29	14.64	17.34	19.21	17.55	20.63	21.76	15.36	20.86	18.09	16.39	16.71	14.11	17.13	18.04	26.13	22.08	19.6	15.53	21.62	16.03	21.11	18.54	18.56	18.08	19.29	25.53	28.97	25	25.68	20.25	23.41	29.97	30.25	28.05	34.33	36.64	23.49	32.73	28.36	24.71	28.47	21.27
115485680	115485680	LOC115485680	0.09	0.09	0.06	0.08	0.11	0.09	0.13	0.09	0.14	0.07	0.08	0.09	0.09	0.09	0.09	0.08	0.09	0.07	0.12	0.15	0.12	0.13	0.09	0.08	0.1	0.09	0.09	0.09	0.07	0.09	0.15	0.15	0.1	0.14	0.16	0.15	0.23	0.15	0.23	0.11	0.14	0.14	0.15	0.14	0.14	0.13	0.14
75430	75430	Anapc15	23.09	21.99	23.92	23.51	23.02	22.26	21.17	22.55	24.9	25.78	27.95	25.35	26.79	29.08	24.35	20.37	27.69	26.68	29.12	26.97	29.93	24.5	27.16	22.29	24.37	20.69	23.23	24.69	26.02	24.39	35.94	37.01	37.55	39.55	35.08	35.61	36.58	35.51	39.79	42.9	47.06	38.77	42.03	45.61	36.7	34.71	41.74
67213	67213	Cmtm6	23.63	19.55	16.31	20.41	17.47	21.3	23.82	20.36	19.77	27.18	26.88	14.25	20.75	18.92	25.36	16.36	16	21.65	17.39	39.14	22.02	18.66	27.08	31.5	23.48	40.91	24.62	25.47	21.21	26.04	36.78	32.91	25.61	34.34	26.63	34.07	41.16	32.05	31.6	45.22	45.28	21.79	32.57	29.67	38.23	27.88	24.12
66612	66612	Ormdl3	36.4	33.32	29.89	32.25	30.95	36.76	30.46	30.78	31.04	36.7	34.12	24.35	29.4	29.33	35.64	30.55	30.25	32.89	27.68	43.3	28.8	32.08	30.16	33.38	35.19	35.43	31.49	39.02	32.63	32.12	56.64	56.09	46.92	54.24	47.17	58.79	52.64	48.47	49.62	61.07	57.46	37.24	46.14	45.99	53.73	52.05	45.61
71564	71564	Izumo4	9.79	9.48	7.5	10.3	8.13	11.58	17.34	7.91	15.83	9.11	9.77	7.51	8.15	8.78	9.32	9.85	7.48	6.94	9.58	12.01	10.1	12.52	10.81	12.02	10.84	12.15	10.88	12.97	7.73	10.31	15.23	15.95	11.78	17.32	12.4	18.52	29.96	12.46	25.31	15.16	16.45	11.49	12.79	13.76	14.06	16.79	11.27
19088	19088	Prkar2b	3.04	10.41	3.01	4.54	2.56	3.31	9.5	4.13	9.39	4.5	6.32	3.1	4.52	4.01	3.25	3.74	3.12	5.4	4.2	6.12	4.8	3.46	4.69	6.81	3.4	5.89	5.22	4.75	6.24	6.12	4.73	17.53	4.73	7.64	3.9	5.29	16.42	6.5	15	7.5	10.64	4.74	7.09	6.29	4.91	6.38	4.7
258922	258922	Olfr267	0	0.06	0	0.05	0	0.05	0	0	0	0	0.05	0	0	0	0	0	0	0	0	0	0.06	0	0	0.06	0	0	0	0	0	0	0	0.09	0	0.09	0	0.08	0	0	0	0	0.09	0	0	0	0	0	0
268527	268527	Greb1	3.77	9.47	0.44	1.91	2.09	2.45	4.6	2.41	1.2	0.54	0.92	0.84	4.85	6.28	3.42	1.07	1.13	1.27	3.47	5.91	2.57	2.82	13.67	1.8	2.66	5.27	6.5	7.45	3.52	7.75	5.86	15.95	0.68	3.22	3.18	3.92	7.95	3.8	1.91	0.89	1.55	1.28	7.61	9.85	5.16	1.82	1.71
63986	63986	Gmfg	14.82	8.64	14.07	16.43	12.64	11.96	11.11	10.29	14.08	16.76	16.12	16.01	19.59	8.8	9.44	8.38	17.58	20.62	15.66	18.43	20.9	12.87	12.41	16.63	17.94	15.55	12.9	18.71	10.76	15.38	23.06	14.54	22.08	27.64	19.26	19.13	19.19	16.21	22.5	27.89	27.14	24.49	30.74	13.79	14.23	14.28	26.51
666532	666532	Zfp991	7.21	6.74	4.64	5.55	4.28	6.22	10.01	7.13	4.69	6.52	10.04	5.12	5.52	5.36	3.95	6.01	4.71	4.4	5.69	7.08	9.17	4.04	10.85	13.59	9.94	12.99	9.72	8.62	8.48	9.51	11.22	11.35	7.29	9.34	6.52	9.94	17.29	11.22	7.5	10.85	16.91	7.84	8.66	8.4	5.95	10.24	7.09
228003	228003	Klhl41	198.56	219.55	359.38	284.29	379	254.76	61.6	249.24	189.89	221.19	136.4	393.05	206.02	225.23	145.11	506.88	454.88	253.24	286.45	0.57	191.13	320.12	197.82	97.81	254.43	33.93	232.69	267.38	177.72	184.34	309.01	369.61	564.1	478.26	577.64	407.49	106.44	392.44	303.51	368.05	229.7	601.19	323.29	353.18	218.76	863.8	685.75
212679	212679	Mars2	1.95	1.89	2.08	1.86	1.91	1.81	1.98	1.89	1.83	2.02	2.13	1.7	1.72	2.16	1.24	2.98	1.67	1.51	1.75	1.39	1.53	2.16	2.52	1.82	2	1.69	2.53	2.39	1.72	2.33	3.04	3.18	3.26	3.14	2.91	2.89	3.42	2.97	2.93	3.36	3.58	2.61	2.7	3.38	1.87	5.08	2.51
237761	237761	Sowaha	0	0.03	0	0	0	0.01	0.03	0	0.03	0.01	0.03	0.01	0	0.02	0.06	0	0	0.01	0	0	0.01	0	0.01	0	0	0.01	0.01	0.01	0	0	0	0.06	0	0	0	0.02	0.05	0	0.04	0.02	0.05	0.02	0	0.04	0.09	0	0
78771	78771	Mctp1	0.88	2.06	0.82	1.7	0.68	1.1	1.68	1.23	0.88	1.36	1.36	1.37	2.23	1.43	1.01	1.21	1.25	2.25	2.08	2.17	2.19	1.26	1.99	4.47	2.54	1.78	2.79	1.92	1.66	3.16	1.38	3.46	1.28	2.86	1.04	1.76	2.91	1.93	1.41	2.26	2.29	2.09	3.5	2.24	1.52	2.05	1.88
208691	208691	Eif5a2	1.34	2.01	1.09	1.7	0.74	1.29	2.34	1.15	1.69	1.39	1.82	0.91	1.41	1.45	0.98	1.12	1.16	1.45	1.22	1.98	1.65	1.54	1.59	1.88	1.59	1.55	1.55	1.32	1.76	1.32	2.09	3.38	1.72	2.86	1.13	2.06	4.05	1.81	2.7	2.3	3.06	1.39	2.22	2.28	1.47	1.92	1.75
64656	64656	Mrps23	58.18	51.04	61.05	52.96	68.69	58.3	48.16	54.25	65.45	50.51	47.01	67.58	50.21	57.52	43.2	64.06	72.8	57.97	60.62	34	55.19	60.57	47.52	37.63	51.58	30.99	48.02	58.1	50.06	43.52	90.55	85.92	95.83	89.09	104.69	93.25	83.21	85.42	104.61	84.05	79.16	103.36	78.79	90.19	65.13	109.17	109.75
19303	19303	Pxn	36.84	41.25	45.64	44.97	48.35	37.95	36.92	38.7	37.13	46.67	43.91	42.73	40.08	37.21	28.56	58.3	39.11	36.05	37.81	42.34	42.44	53.83	36.65	43.45	39.17	44.72	37.39	37.95	34.06	38.11	57.34	69.44	71.63	75.66	73.69	60.69	63.79	60.94	59.34	77.66	73.96	65.36	62.9	58.35	43.06	99.35	58.96
226409	226409	Zranb3	2.44	2.61	3.53	2.98	2.7	2.36	2.47	3.17	2.36	2.87	4.21	5.75	5.54	4.89	2.57	2.6	3.43	5.31	5.62	3.68	5.83	3.17	5.18	7.43	4.78	4.09	5.74	4.4	4.76	5.53	3.79	4.39	5.53	5.02	4.11	3.77	4.27	5	3.77	4.78	7.1	8.79	8.69	7.67	3.88	4.43	5.16
16370	16370	Irs4	0.14	0	0.01	0.01	0.03	0.11	0.13	0.21	0.06	0.01	0	0.04	0.18	0.52	0.1	0	0.24	0.12	0.09	0.46	0.11	0.14	0.03	0.05	0.3	0.06	0.59	0.02	0.03	0.04	0.21	0	0.01	0.01	0.04	0.17	0.22	0.33	0.1	0.01	0	0.06	0.28	0.82	0.14	0	0.35
71810	71810	Ranbp3	41.57	32.76	33.85	32.47	38.15	37.33	43.91	38.62	45.76	32.33	37.44	34.99	38.93	38.8	30.9	36.35	34.42	35.69	40.43	51.92	38.96	46.18	38.48	33.53	32.73	38.31	34.66	35.68	34.68	36.01	64.7	55.15	53.13	54.63	58.15	59.7	75.87	60.81	73.15	53.79	63.06	53.52	61.09	60.84	46.59	61.95	51.88
71310	71310	Tbc1d9	3.6	4.04	3.49	4.58	2.61	3.11	9.21	4.22	7.53	4.71	8.31	4.45	4.93	4.52	3.44	3.13	3.57	6.23	4.47	5.44	5.32	3.87	4.74	8.21	5.55	5.54	5.25	4.98	5.09	5.83	5.61	6.8	5.48	7.7	3.97	4.98	15.91	6.64	12.04	7.83	13.99	6.81	7.73	7.08	5.19	5.33	5.38
319701	319701	Fbxo48	0.15	0.55	0.22	0.28	0.19	0.22	0.19	0.16	0.26	0.26	0.67	0.1	0.26	0.22	0.21	0.53	0.26	0.17	0.19	0.57	0.22	0.11	0.55	0.55	0.35	0.38	0.43	0.19	0.24	0.49	0.23	0.92	0.34	0.48	0.29	0.36	0.34	0.26	0.41	0.44	1.12	0.15	0.41	0.34	0.31	0.9	0.38
74152	74152	Stra6l	2.78	1.42	0.75	0.48	1.29	1.81	4.22	2.64	1.14	0.61	1.6	3.35	5	5.24	20.54	1.5	3.3	3.09	4.06	4.85	4.1	3.14	3.52	4.19	4.87	4.04	4.27	1.79	2.24	3.4	4.32	2.38	1.18	0.8	1.96	2.9	7.29	4.16	1.83	1.01	2.69	5.13	7.84	8.21	30.97	2.55	4.97
67416	67416	Armcx2	11.63	14.86	12.67	16.42	11.17	12.51	17.96	16.83	15.11	16.69	18.39	9.14	15.47	14.86	10.65	20.01	10.82	13.25	11.48	18.73	15.67	20.56	19.59	17.34	13.79	15.9	17.4	15.04	14.22	16.69	18.1	25.01	19.89	27.62	17.02	20.01	31.03	26.51	24.15	27.78	30.98	13.98	24.27	23.3	16.05	34.11	16.31
16907	16907	Lmnb2	7.59	8.78	8.22	8.96	8.01	6.52	7.9	7.49	6.32	9.69	11.22	4.84	9.75	8.2	5.48	15.58	5.52	5.56	6.46	11.32	7.3	10.03	13.44	9.11	7.24	9.48	9.44	7.83	7.82	9.55	11.81	14.79	12.91	15.07	12.21	10.43	13.65	11.79	10.1	16.13	18.9	7.4	15.3	12.85	8.27	26.55	8.32
75627	75627	Snapc1	10.9	11.5	11.68	12.49	11	8.54	11.39	10.33	9.92	11.98	11.88	10.98	10.97	9.04	8.01	10.82	10.76	10.67	11.16	11.41	11.03	11.76	11.69	10.38	9.56	11.85	10.32	11.97	11.34	10.86	16.96	19.36	18.33	21.01	16.76	13.66	19.68	16.27	15.86	19.93	20.01	16.79	17.22	14.17	12.08	18.44	16.22
12166	12166	Bmpr1a	18.32	17.76	16.15	16.27	16.81	18.6	33	19.7	26.73	16.72	14.95	15.94	18.82	20.22	14.66	19.32	16.54	20.01	15.6	20.94	17.51	19.12	20.94	20	18.7	23.42	17.72	14.22	20.5	17.01	28.5	29.9	25.36	27.37	25.62	29.75	57.01	31.02	42.73	27.82	25.18	24.38	29.54	31.7	22.1	32.92	24.93
54607	54607	Socs6	8.11	8.55	7.86	7.17	7.35	6.72	6.95	7.88	8.35	7.15	6.48	8.8	7.35	8.08	5.73	9.67	8.58	8.09	8.59	8.58	7.45	8.35	8.54	7.63	8.44	7.05	8.45	7.51	7.39	8.32	12.62	14.39	12.33	12.07	11.21	10.75	12	12.41	13.35	11.89	10.92	13.46	11.53	12.67	8.63	16.48	12.93
171275	171275	Vmn1r212	0	0	0	0	0	0	0	0	0	0	0	0	0	0.1	0	0	0	0	0	0	0	0	0	0	0	0	0	0	0	0	0	0	0	0	0	0	0	0	0	0	0	0	0	0.15	0	0	0
17961	17961	Nat2	4.97	5.77	4.45	4.4	3.89	3.98	4.37	4.34	4.38	4.06	5.77	3.19	4.38	4.56	9.27	3.6	3.98	4.77	3.86	7.85	5.85	4.35	5.37	5.28	4.08	6.38	3.98	5.21	4.68	4.26	7.74	9.71	6.99	7.39	5.93	6.37	7.56	6.83	6.99	6.75	9.72	4.88	6.88	7.15	13.98	6.13	6
108147	108147	Atic	32.63	27.89	26.82	27.26	29.46	27.82	29.89	27.15	26.21	29.91	38.51	23.73	33.03	33.61	22.55	35.54	27.25	28.62	29.16	41.72	28.41	35.93	40.66	30.74	29.31	35.45	31.32	31.2	28.29	33.11	50.77	46.96	42.1	45.87	44.89	44.49	51.64	42.75	41.89	49.77	64.85	36.29	51.83	52.7	33.99	60.56	41.08
108052	108052	Slc14a1	1.38	0.18	0.47	0.8	1.12	0.57	0.73	0.57	0.34	0.7	0.57	0.39	1.93	1.19	0.6	0.39	0.61	0.8	1.35	0.99	0.62	0.51	3.06	0.98	1.19	0.94	0.72	1.07	0.35	0.79	2.15	0.3	0.74	1.34	1.7	0.91	1.26	0.9	0.55	1.16	0.95	0.6	3.03	1.87	0.91	0.66	0.93
217593	217593	Slc25a21	0	0.02	0	0.03	0	0.04	0.06	0.02	0.07	0	0	0	0	0.04	1.92	0.02	0	0	0.03	0.02	0.02	0	0.02	0.02	0.02	0.02	0.02	0.02	0.03	0	0	0.03	0	0.05	0	0.06	0.1	0.02	0.11	0	0	0	0	0.06	2.89	0.03	0
17193	17193	Mbd4	2.13	2.75	2.32	2.66	2.89	2.6	3.15	2.67	3.34	2.09	3.32	2.18	2.63	3.44	2.09	2.95	2.32	1.77	2.6	3.12	3.18	4.05	3.5	3.12	3.04	2.59	2.7	2.25	2.03	2.65	3.31	4.63	3.64	4.48	4.4	4.17	5.44	4.21	5.33	3.48	5.58	3.34	4.12	5.39	3.15	5.03	3.49
18583	18583	Pde7a	10.7	8.36	9.86	8.7	10.83	9.3	6.75	10.63	8.28	7.9	7.13	8.5	8.26	11.31	6.32	14.08	10.34	7.29	8.34	16.67	9.72	13.96	9.56	7.95	8.99	13.58	7.51	6.8	6.16	8.19	16.65	14.08	15.48	14.63	16.51	14.88	11.66	16.73	13.24	13.15	12.01	13.01	12.96	17.73	9.53	23.99	15.58
69698	69698	Slc52a3	3.86	2.23	1.73	1.37	3.34	3.2	2.19	3.72	2.74	1.88	2.04	1.89	3.4	2.83	1.92	1.41	1.48	2.07	2.17	7.03	2.91	2.8	3.69	3.25	2.23	7.18	2.36	2.48	2.49	3.54	6	3.75	2.72	2.3	5.09	5.12	3.78	5.85	4.38	3.13	3.43	2.88	5.34	4.43	2.89	2.4	2.22
217869	217869	Eif5	60.86	61.41	50.64	53.92	48.78	50.92	64.68	53.4	54.5	50.79	54.98	55.8	57.59	57.1	58.94	60.64	49.61	51.21	55.85	63.59	57.49	56.95	68.92	59.89	54.36	64.14	54.8	61.58	57.06	58.71	94.72	103.38	79.48	90.72	74.35	81.45	111.76	84.09	87.12	84.51	92.59	85.34	90.37	89.54	88.85	103.34	74.8
72658	72658	2700097O09Rik	4.92	3.5	6.06	4.7	5.31	4.39	5.31	3.41	4.16	5.08	3.17	4.4	4.12	4.32	3.7	4.33	4.54	4.74	3.65	3.63	4.05	3.98	4.56	3.39	4.46	3.33	4.49	5.35	3.54	4.35	7.66	5.9	9.51	7.91	8.09	7.02	9.18	5.36	6.65	8.46	5.33	6.74	6.47	6.77	5.58	7.38	6.85
71835	71835	Lancl2	4.36	4.18	4	4.77	4.3	4.43	5.9	5.25	5.26	4.07	5.46	4.78	5.31	5.54	3.73	4.6	4.29	4.67	5.24	5.52	5.49	4.51	6.83	4.76	4.7	4.58	5.7	4.61	4.33	4.78	6.78	7.03	6.28	8.03	6.55	7.08	10.19	8.27	8.41	6.77	9.2	7.31	8.33	8.69	5.62	7.83	6.47
109663	109663	Hoxc11	0.92	0.23	0	0.17	1.25	0.17	1.08	2.93	1.1	0.17	0.34	0.65	1.37	2.28	0.06	0.12	1.1	0.39	0.85	1.98	0.18	0.06	0.7	0.06	0.95	0.57	1.07	0.39	0.28	0.11	1.43	0.39	0	0.28	1.91	0.26	1.87	4.61	1.75	0.28	0.56	1	2.14	3.57	0.09	0.2	1.65
72690	72690	Grrp1	15.36	15.1	15.7	15.77	19.45	15.97	18.82	17.85	29.69	14.72	18.59	18.62	26.19	17.16	12.85	13.43	11.41	17.46	21.01	29	28.02	28.71	20.3	22.45	15.97	17.83	17.27	26.67	22.49	23.03	23.9	25.42	24.64	26.53	29.64	25.54	32.52	28.11	47.45	24.5	31.31	28.48	41.1	26.91	19.38	22.88	17.2
50721	50721	Sirt6	12.69	8.45	7	9.58	8.35	9.46	11.4	9.53	10.28	9.19	10.9	5.95	8.92	8.96	6.41	9.12	6.07	6.39	7.81	15.95	10.17	10.17	9.24	10.45	10.47	15.35	8.66	11.15	7.98	10.23	19.75	14.23	10.98	16.11	12.72	15.14	19.7	15.01	16.42	15.29	18.36	9.09	13.99	14.05	9.66	15.54	9.15
16425	16425	Itih2	0.08	0.12	0.12	0.15	0.14	0.18	0.16	0.08	0.07	0.33	0.14	0.11	0.05	0.23	174.62	0.19	0.08	0.08	0.01	0.05	0.1	0.27	0.21	0.21	0.04	0.14	0.25	0.26	0.21	0.11	0.12	0.2	0.19	0.26	0.21	0.28	0.27	0.12	0.12	0.55	0.24	0.17	0.09	0.37	263.25	0.32	0.12
242109	242109	Zfp697	1.27	2.91	1.34	1.95	1.3	1.04	1.21	1.46	1.17	1.39	1.53	0.99	1.07	1.2	0.8	3.33	1.19	0.83	1.42	2.06	1.65	2.32	0.97	1.45	1.36	1.66	1.35	1.4	1.64	2.09	1.98	4.9	2.11	3.28	1.99	1.66	2.09	2.3	1.87	2.32	2.57	1.52	1.67	1.88	1.21	5.68	1.79
105242930	105242930	Gm39002	0.01	0	0	0	0	0	0	0	0	0	0	0	0	0	0	0	0	0	0	0	0	0	0	0	0	0.01	0	0	0	0	0.02	0	0	0	0	0	0	0	0	0	0	0	0	0	0	0	0
171543	171543	Bmf	17.31	8.64	6.03	8.26	13.75	12.02	12.91	11.97	12.95	9.2	9.62	8.9	11.21	10.86	8.42	10.35	8.81	9.54	8.49	23.42	12.79	13.25	9.49	12.22	14.26	22.32	8.54	9.34	6.14	9.14	26.94	14.55	9.47	13.89	20.95	19.23	22.3	18.85	20.69	15.31	16.21	13.61	17.59	17.03	12.69	17.64	13.28
15170	15170	Ptpn6	14.33	12.94	18.63	21.51	11.78	12.24	13.43	11.44	10.53	25.16	36.39	17.37	24.13	12.9	15.93	14.39	15.84	24.13	19.21	23.99	23.88	15.92	17.4	34.51	23.27	20.97	23.07	26.99	16.78	25.77	22.3	21.78	29.24	36.19	17.95	19.58	23.21	18.01	16.84	41.86	61.28	26.57	37.86	20.24	24.01	24.53	23.88
16876	16876	Lhx9	0.02	0.02	0.1	0.04	0.02	0.05	0.04	0.07	0	0.02	0.05	0.01	0.02	0.03	0.05	0.12	0.11	0.05	0.05	0.01	0.06	0.25	0.02	0	0.04	0.04	0.05	0.01	0.02	0.01	0.04	0.04	0.15	0.07	0.04	0.07	0.06	0.11	0	0.04	0.08	0.01	0.04	0.05	0.07	0.21	0.17
73545	73545	1700094D03Rik	2.57	1.95	1.85	1.74	2.76	2.21	3	2.34	3.55	1.43	1.45	2.43	2.66	2.55	1.95	1.66	1.89	1.7	2.76	3.38	2.29	2.6	1.74	1.88	2.01	2.91	1.51	1.7	1.37	1.67	3.99	3.28	2.9	2.93	4.2	3.54	5.19	3.68	5.68	2.37	2.43	3.72	4.17	3.99	2.93	2.84	2.84
69976	69976	Galk2	16.77	17.75	11.61	14.72	13.65	14.87	15.83	17.03	14.77	15.89	19.68	13.62	16.78	16.03	14.54	13.88	15.11	16.18	15.2	28.54	19.58	19.36	15.92	17.25	17.08	20.97	14.67	19.02	13.8	16.14	26.09	29.88	18.23	24.77	20.81	23.78	27.35	26.82	23.61	26.44	33.14	20.83	26.34	25.14	21.92	23.65	22.77
20416	20416	Shc1	59.83	54.83	35.93	45.24	44.56	47.28	70.83	62.79	52.26	47.64	55.02	38.99	51.01	58.21	43.25	43.92	36.51	46.29	49.79	85.17	60.13	59.62	53.56	56.13	55.38	67.34	50.18	49.82	48.91	54.37	93.12	92.3	56.4	76.11	67.91	75.63	122.39	98.87	83.53	79.27	92.66	59.63	80.05	91.27	65.2	74.84	55.03
217353	217353	Tmc6	10.64	16.8	10.68	12.23	9.91	10.97	10.99	9.72	13.1	14.56	13.73	9.17	10.96	9.24	8.95	12.33	9.15	10.24	10.1	15.98	14.44	13.7	10.03	14.02	11.63	19.01	10.39	13.59	12.41	14.22	16.56	28.28	16.77	20.57	15.1	17.54	18.99	15.31	20.94	24.23	23.12	14.03	17.2	14.48	13.49	21.01	13.8
435921	435921	Clec2f	1.23	0	0	0.03	0.44	0.45	0.11	0.29	0.24	0	0.09	0	0.29	0.76	0.29	0	0.12	0.38	0.3	2	0.41	0.4	2.1	0.39	0.46	2.95	0.18	0	0.12	1.13	1.92	0	0	0.05	0.67	0.72	0.19	0.45	0.38	0	0.16	0	0.46	1.19	0.43	0	0.18
231238	231238	Sel1l3	15.09	12.84	10.42	10.96	21.32	16.09	5.18	16.82	8.58	8.41	7	19.96	14.15	15.91	10.11	10.64	13.97	12.89	13.9	19.96	13.2	10.56	17.8	12.59	14.79	22.03	13.69	8.77	9.48	12.89	23.48	21.62	16.35	18.44	32.49	25.74	8.95	26.49	13.72	13.99	11.79	30.53	22.2	24.95	15.25	18.14	21.07
100121	100121	Tdrd7	8.27	8.94	11.08	11.8	8.62	8.08	9.95	8.31	10.78	11.2	12.24	8.43	10.39	10.35	9.99	10.63	8.73	9.85	9.54	13.18	11.96	12.45	9.15	10.41	9.13	11.48	9.9	11.05	8.81	10.58	12.86	15.05	17.4	19.85	13.14	12.93	17.19	13.09	17.22	18.64	20.62	12.9	16.3	16.23	15.05	18.11	13.17
11891	11891	Rab27a	6.02	3.46	2.27	3.35	4.4	5.1	16.42	4.95	11.56	3.57	3.31	4	5.68	6.05	5.46	3.05	3.08	5.77	3.59	7.16	5.69	5.39	10.63	7.85	6.59	9.29	4.28	4.44	7.68	4.73	9.36	5.82	3.56	5.63	6.71	8.16	28.36	7.8	18.48	5.95	5.58	6.12	8.92	9.48	8.24	5.2	4.64
71562	71562	Afmid	4.56	4.25	5.57	5.69	5.57	4.84	5.7	4.22	4.8	4.56	4.71	5.31	4.74	4.33	20.47	7.51	5.24	4.09	4.77	3.2	4.68	6.84	4.5	3.72	5.29	3.56	4.84	4.37	3.81	3.82	7.09	7.15	8.75	9.58	8.49	7.74	9.86	6.64	7.67	7.59	7.93	8.12	7.43	6.79	30.87	12.8	7.9
75305	75305	Ankrd53	0	0	0	0	0	0	0	0	0	0	0	0	0	0	0	0	0	0	0	0	0	0.04	0.03	0.05	0	0	0	0	0	0	0	0	0	0	0	0	0	0	0	0	0	0	0	0	0	0	0
53325	53325	Banp	10.25	11.82	9.93	10.18	10.7	8.02	11.98	12.72	10.25	9.41	10.9	7.36	12.68	11.48	9.41	9.29	7.3	6.02	11.74	21.85	14.84	13.77	8.84	11.46	7.82	15.38	8.8	11.55	12.4	12.45	15.95	19.89	15.58	17.12	16.31	12.82	20.7	20.03	16.39	15.66	18.36	11.26	19.9	18	14.19	15.83	11.01
100039210	100039210	Gm2102	0.01	0	0.03	0.06	0.01	0.11	0.86	0	0.97	0	0.01	0.04	0	0.03	0.11	0.05	0	0.19	0.03	0.05	0	0.1	0.01	0.08	0.01	0.08	0.06	0	0.08	0.02	0.02	0	0.04	0.11	0.02	0.18	1.49	0	1.56	0	0.02	0.06	0	0.04	0.16	0.09	0
11784	11784	Apba2	0.22	0.3	0.08	0.25	0.23	0.38	1.83	0.18	2.2	0.25	0.17	0.17	0.17	0.16	0.18	0.33	0.32	0.88	0.17	0.22	0.13	0.32	0.19	0.61	0.47	0.66	0.2	0.28	0.64	0.32	0.34	0.51	0.13	0.42	0.35	0.6	3.17	0.29	3.52	0.41	0.28	0.26	0.26	0.25	0.27	0.56	0.48
20404	20404	Sh3gl2	0.62	0.11	0.03	0.06	0.43	0.62	1.69	0.82	1.34	0.11	0.06	0.3	0.73	1.47	0.52	0	0.25	0.33	0.84	1.33	0.45	0.6	2.43	0.35	0.61	0.89	0.97	0.38	0.55	1.6	0.96	0.19	0.05	0.1	0.65	1	2.92	1.29	2.14	0.18	0.1	0.45	1.15	2.31	0.79	0	0.38
76982	76982	Vxn	0.01	0.04	0.1	0.02	0.05	0.02	0.02	0.01	0.07	0.41	0	0	0.09	0	0.04	0	0.03	0.03	0.01	0	0.01	0.04	0	0.01	0.06	0	0.05	0.01	0.04	0.02	0.02	0.07	0.16	0.04	0.08	0.04	0.03	0.02	0.12	0.68	0	0	0.15	0	0.06	0	0.04
100043757	100043757	Zfp831	0.1	0.03	0.06	0.04	0.03	0.04	0.04	0.05	0.08	0.07	0.09	0.07	0.05	0.02	0.04	0.05	0.06	0.03	0.05	0.12	0.09	0.03	0.07	0.12	0.14	0.09	0.12	0.06	0.04	0.14	0.16	0.05	0.09	0.06	0.05	0.06	0.07	0.07	0.12	0.12	0.16	0.11	0.08	0.03	0.05	0.08	0.09
269855	269855	Ssc5d	18.58	26.11	36.4	58.37	29.2	33.04	28.95	14.32	17.68	54.54	33.91	15.51	20.9	17.13	14.16	61.56	30.24	19.14	16.12	20.57	20.13	61.88	23.98	32.22	30.89	24.78	32.38	27.66	35.65	29.46	28.92	43.96	57.14	98.2	44.5	52.84	50.02	22.55	28.26	90.76	57.1	23.73	32.8	26.87	21.35	104.91	45.58
26927	26927	Foxl2	12.12	5.96	0.37	1.2	4	8.03	4.68	10.23	4.74	0.31	0.66	4.42	11.84	12.43	6.72	0.02	2.71	6.25	12.3	21.69	9.29	7.9	11.23	4.3	6.6	10.05	6.37	3.47	3.08	15.58	18.87	10.04	0.58	2.02	6.09	12.84	8.08	16.1	7.58	0.51	1.11	6.76	18.58	19.49	10.13	0.03	4.08
14058	14058	F10	2.42	5.29	5.59	8.48	2.13	2.48	3.58	2.7	2.43	5.86	7.31	8.74	12.15	4.78	101.49	2.05	5.16	12.55	9.51	6.7	13.22	3.95	8.47	14.83	8.82	6.92	9.76	7.94	6.37	9.98	3.77	8.91	8.78	14.26	3.24	3.96	6.18	4.25	3.88	9.76	12.32	13.37	19.06	7.5	153.01	3.5	7.78
12322	12322	Camk2a	52.91	33.11	45.96	34.79	48.88	44.75	13.75	46.03	33.18	22.34	23.76	59.6	37.13	41.75	28.01	24.07	47.37	40.19	47.43	1.79	31.13	21.81	28.65	20.95	36.98	5.33	35.62	25.61	35.37	26.85	82.34	55.75	72.13	58.53	74.49	71.58	23.76	72.48	53.04	37.16	40.02	91.17	58.27	65.46	42.23	41.02	71.41
70261	70261	Chp2	4.81	2	1.93	1.91	2.66	4.01	2.68	4.34	3.31	3.78	2.06	2.87	3.12	4.02	3.94	3.21	2.92	3.9	3.46	5.45	4.72	5.3	4.24	5.09	6.37	7.62	5.52	3.53	3.89	2.66	7.49	3.36	3.02	3.22	4.05	6.41	4.63	6.84	5.29	6.29	3.47	4.39	4.89	6.31	5.95	5.48	4.4
19348	19348	Kif20a	6.2	6.73	5.79	8.06	4.15	5.28	6.21	7.49	5.25	8.27	14.76	2.97	9.39	8.55	5.02	5.28	3.42	5.75	4.66	10.71	9.76	8.12	13.76	7.96	5.66	9.36	7.26	6.54	7.67	8.61	9.65	11.33	9.09	13.56	6.33	8.45	10.73	11.8	8.39	13.76	24.86	4.54	14.74	13.4	7.57	9	5.16
26358	26358	Aldh1a7	0.77	0.23	0.36	0.24	0.2	0.28	0.35	0.25	0.14	0.44	0.12	0.13	0.22	0.35	32.55	0.02	0.4	0.37	0.33	0.17	0.07	0.36	0.23	0.5	0.39	0.17	0.53	0.1	0.31	0.26	1.2	0.39	0.56	0.41	0.3	0.45	0.6	0.39	0.23	0.74	0.2	0.2	0.34	0.55	49.08	0.04	0.6
195522	195522	Zfp691	8.63	7.53	6.98	6.14	6.25	6.91	6.98	7.17	6.46	6.48	6.13	7.64	5.7	7.01	5.7	7.58	5.24	5.34	6.65	7.01	6.34	7.21	4.73	5.46	6.05	6.42	5.8	6.89	5.34	5.51	13.43	12.68	10.96	10.33	9.52	11.05	12.06	11.28	10.32	10.78	10.32	11.68	8.95	10.99	8.59	12.92	7.91
214575	214575	Tdrd5	0.16	0.07	0	0.03	0.11	0.06	0.05	0.06	0.04	0.05	0.09	0.01	0.03	0.1	0.06	0.03	0.05	0.02	0.08	0.21	0.08	0.07	0.09	0.07	0.06	0.08	0.17	0.11	0.05	0.06	0.25	0.11	0	0.04	0.17	0.1	0.08	0.1	0.07	0.08	0.15	0.02	0.04	0.15	0.09	0.05	0.07
107734	107734	Mrpl30	107.92	91.46	110.42	90.73	123.76	107.17	77.01	101.1	101.33	86.02	83.83	127.64	91.95	101.09	98.33	101.03	105.46	90.92	105.19	66.75	92.24	89.86	91.97	67.95	101.17	66.86	79.11	96.69	93.39	80.9	167.95	153.97	173.32	152.63	188.62	171.43	133.06	159.19	161.96	143.13	141.18	195.24	144.3	158.52	148.24	172.18	158.98
74734	74734	Rhoh	0.92	0.6	0.99	0.91	0.62	0.72	0.54	0.47	0.48	1.05	1.39	0.79	0.68	0.57	0.68	1.23	0.77	0.91	0.72	0.94	0.89	1.07	0.71	1.14	1.05	0.87	0.75	1.4	0.61	0.97	1.43	1.01	1.56	1.53	0.95	1.15	0.93	0.74	0.77	1.75	2.34	1.21	1.07	0.9	1.03	2.1	1.17
67285	67285	Cwc27	14.51	10.12	10.27	11.78	12.33	12.09	13.07	13.12	14.1	10.58	11.4	11.26	10.35	11.63	11.29	10.68	13.21	12.74	14.6	14.74	13.11	15.08	13.3	11.56	10.5	11	11.19	13.35	11.01	11.91	22.57	17.03	16.12	19.82	18.79	19.33	22.58	20.66	22.54	17.6	19.2	17.22	16.24	18.24	17.02	18.21	19.92
59036	59036	Dact1	8.72	11.02	6.05	9.09	5.77	8.55	13.28	9.65	15.12	9.36	13.16	5.99	6.74	7.08	6.41	6.49	8.08	8	7.86	15.36	8.91	9.23	5.66	12.89	9.63	10.43	9.56	7.93	10.21	9.49	13.57	18.55	9.49	15.28	8.79	13.67	22.95	15.19	24.17	15.57	22.16	9.16	10.57	11.1	9.67	11.06	12.18
16668	16668	Krt18	85.42	9.92	17.21	37.42	91.97	52	30.14	47.08	43.88	22.21	10.35	10.7	30.6	61.99	122.34	63.52	24.81	25.11	37.46	180.76	37.8	58.47	45.51	24.05	31.79	167.9	23.16	26.63	23.22	39.4	132.94	16.7	27.02	62.94	140.18	83.17	52.07	74.13	70.13	36.95	17.42	16.36	48.02	97.21	184.44	108.24	37.41
217082	217082	Hlf	0.83	0.22	0.16	0.34	0.31	0.57	1.39	0.87	1.67	0.15	0.22	0.39	0.61	1.36	3.22	0.45	0.43	0.86	0.78	0.5	0.62	0.93	0.53	0.43	0.44	0.25	0.78	0.26	0.75	0.56	1.29	0.38	0.25	0.57	0.47	0.92	2.39	1.38	2.66	0.26	0.37	0.59	0.96	2.13	4.85	0.76	0.65
20513	20513	Slc1a6	0.53	0.12	0.08	0.1	0.11	0.42	0.57	0.54	0.41	0.04	0.36	0.19	0.38	0.25	0.26	0.1	0.27	0.21	0.25	0.94	0.21	0.09	0.24	0.19	0.41	0.39	0.38	0.22	0.16	0.29	0.83	0.21	0.13	0.17	0.16	0.67	0.98	0.85	0.66	0.06	0.6	0.29	0.6	0.4	0.4	0.16	0.41
68184	68184	Denr	64.25	52.39	53.52	51.02	57.27	56.01	43.57	51.93	45.46	53.75	50.94	50.66	49.29	56.63	52.45	55.47	56.32	54.74	58.82	58.45	47.02	55.12	60.08	47.12	50.94	55.9	53.96	57.25	51.86	51.44	99.99	88.2	84.01	85.83	87.28	89.58	75.28	81.77	72.65	89.44	85.78	77.48	77.34	88.79	79.07	94.52	84.91
214254	214254	Nudt15	2.3	1.67	2.59	2.07	2.62	2.34	1.47	1.98	2.11	1.71	1.86	2.58	1.97	2.16	1.76	2.27	2.4	1.98	2.54	1.45	2.16	2.18	2.21	1.62	2.49	1.34	2.17	1.84	1.65	1.81	3.58	2.81	4.06	3.48	4	3.74	2.55	3.12	3.37	2.85	3.13	3.94	3.09	3.39	2.66	3.87	3.61
237890	237890	Slfn14	0	0	0	0	0.02	0	0	0	0	0	0.01	0	0	0.02	0	0	0	0	0	0	0	0	0	0	0	0	0	0	0	0	0	0	0	0	0.02	0	0	0	0	0	0.02	0	0	0.03	0	0	0
76843	76843	Dtl	2.07	1.66	1.64	2.26	1.4	1.86	1.87	1.94	1.26	2.16	3.15	0.99	2.57	2.29	1.17	1.82	1.58	1.72	1.99	2.84	2.13	1.98	4.37	2.23	1.95	2.25	2.88	2.1	1.68	2.51	3.22	2.79	2.57	3.8	2.14	2.98	3.22	3.05	2.01	3.6	5.31	1.52	4.04	3.59	1.76	3.11	2.38
20335	20335	Sec61g	87.21	94.18	95.12	98.81	80.88	84.6	96.65	86.42	79.46	101.47	99.89	76.77	93.51	97.06	86.58	72.58	86.13	82.73	89.61	101.31	105.64	101.99	111.88	85.38	79.41	95.15	75.86	115.86	102.41	96.28	135.73	158.56	149.3	166.22	123.27	135.32	166.99	136.08	127	168.84	168.21	117.42	146.74	152.19	130.53	123.68	129.85
330671	330671	B4galnt4	1.92	0.26	0.13	0.22	0.34	1.06	1.35	0.72	1.32	0.25	0.47	0.3	0.83	1.31	0.49	0.08	0.56	0.74	0.95	1.85	0.57	0.77	0.61	0.82	1.01	0.96	1.02	0.25	0.41	0.44	2.99	0.45	0.21	0.37	0.52	1.69	2.33	1.14	2.11	0.42	0.79	0.46	1.3	2.05	0.74	0.14	0.84
101055951	101055951	LOC101055951	0	0	0	0	0	0	0	0	0	0	0	0	0	0	0	0	0	0	0	0	0	0	0	0	0.01	0	0	0	0	0	0	0	0	0	0	0	0	0	0	0	0	0	0	0	0	0	0
240058	240058	Cpne5	0.48	0.27	0.1	0.28	0.28	0.5	0.49	0.37	0.45	0.06	0.1	0.22	0.13	0.4	0.15	0.24	0.21	0.16	0.33	0.52	0.35	0.18	0.37	0.23	0.21	0.73	0.53	0.2	0.35	0.22	0.74	0.46	0.16	0.47	0.43	0.8	0.85	0.58	0.72	0.1	0.17	0.33	0.2	0.62	0.22	0.4	0.32
434866	434866	Gm15127	0	0	0	0	0	0	0	0.02	0.05	0	0	0	0	0.04	0	0	0	0	0	0	0	0	0	0	0	0	0	0	0	0	0	0	0	0	0	0	0	0.03	0.08	0	0	0	0	0.07	0	0	0
252837	252837	Ackr4	1.26	34.36	1.55	10.33	1.54	3.42	10.88	1.42	15.77	3.32	4.77	1.42	0.55	0.98	1.96	0.84	1.4	3.53	1.3	2.07	1.96	2.04	0.72	2.4	1.16	2.4	1.18	4.14	7.68	6.96	1.95	57.84	2.44	17.38	2.35	5.47	18.79	2.23	25.2	5.53	8.04	2.17	0.86	1.54	2.96	1.43	2.11
241201	241201	Cdh7	0	0	0.01	0	0	0	0.02	0	0.01	0	0	0	0	0	0	0	0	0	0	0	0	0	0	0	0	0	0	0	0	0	0	0	0.02	0	0	0	0.03	0	0.02	0	0	0	0	0.01	0	0	0.01
58234	58234	Shank3	5.26	7.56	5.47	6.64	4.72	5.83	8.18	7.42	7.11	6.56	7.51	6.41	9.65	8.28	5.21	7.5	4.1	4.76	6.45	9.76	8.07	10.03	7.46	10.94	6.86	6.48	8.61	6.99	6.56	8.19	8.19	12.73	8.59	11.18	7.2	9.32	14.14	11.68	11.36	10.91	12.65	9.81	15.15	12.98	7.86	12.79	6.18
72891	72891	Xlr4c	0.69	0.4	0.57	0.1	0.31	0.27	0.23	0	0.36	0.69	0.19	0.23	0.4	0.29	0.23	0.54	0.7	0.52	0.22	0.47	0.9	0.41	0.65	0.45	0.6	0.37	0.68	0.51	0.26	0.75	1.07	0.67	0.89	0.17	0.48	0.43	0.39	0	0.58	1.15	0.33	0.35	0.63	0.45	0.34	0.92	1.06
12330	12330	Canx	77.38	91.15	69.02	85.06	60.98	73.09	86.62	71.33	68.6	94.56	102.51	56.93	78.24	74.68	79.82	72.2	62.74	78.55	66.17	113.69	83.54	78.77	97.8	91.12	73.6	104.48	83.19	86.43	87.88	94.82	120.42	153.46	108.33	143.1	92.93	116.91	149.67	112.31	109.64	157.34	172.64	87.07	122.77	117.1	120.33	123.04	94.59
18538	18538	Pcna	73.45	69.91	66.98	73.84	58.29	63.81	69.56	73.82	64.62	76.59	110.38	67.29	113.67	88.6	62.42	63.06	74.07	83.21	91.27	115.49	95.85	89	128.1	87.63	74.17	74.57	86.8	96.87	75.6	95.31	114.31	117.7	105.14	124.22	88.84	102.07	120.19	116.24	103.28	127.44	185.9	102.92	178.37	138.94	94.1	107.46	111.67
53318	53318	Pdlim3	315.08	346.03	518.93	416.6	620.35	406.53	477.38	482.77	532.69	355.72	182.95	638.5	423.65	431.53	270.65	887.38	603.4	398.27	467.87	76.79	320.87	609.24	376.89	230.18	398.61	127.51	404.33	265.26	403.9	281.17	490.35	582.54	814.55	700.82	945.48	650.25	824.81	760.15	851.43	591.9	308.11	976.61	664.81	676.66	408.03	1512.22	909.66
622402	622402	Akr1c12	1.44	0.48	0.28	0.08	1.27	1.42	0.52	0.35	0.44	0.34	0.62	0.33	0.66	0.82	24.17	0.29	0.47	0.81	0.67	3	0.42	0.54	0.6	0.79	0.8	1.89	0.47	0.19	0.27	0.72	2.24	0.81	0.45	0.13	1.94	2.27	0.9	0.55	0.71	0.57	1.04	0.5	1.04	1.28	36.44	0.49	0.72
66549	66549	Aggf1	23.63	20.57	17	18.84	18.85	19.95	20.89	23.51	20.1	20.16	20.71	19.69	22.16	23.75	15.81	20.69	21.02	19.69	22.12	32.77	25.21	23.68	24.14	22	22.59	28.69	21.24	19.15	21.09	22.15	36.77	34.64	26.68	31.69	28.73	31.91	36.1	37.01	32.13	33.55	34.88	30.11	34.77	37.25	23.83	35.27	31.68
193116	193116	Slu7	16.47	15.74	13.48	14.39	13.01	13	16.11	15.31	13.16	14.95	13.22	13.68	13.18	14.68	11.53	15.38	12.28	13.18	13.53	15.98	13.84	14.94	15.32	14.37	15.36	17.18	14.27	14.51	14.01	14.54	25.64	26.49	21.16	24.2	19.83	20.79	27.84	24.11	21.04	24.88	22.26	20.92	20.68	23.01	17.39	26.2	18.51
55949	55949	Eef1b2	244.14	209.35	200.43	189.63	256.38	230.14	239.23	249.12	241.06	204.33	235.62	226.52	238.32	253.06	201.6	209.47	234.62	238.92	270.23	312.95	284.81	311.4	233.24	175.89	184.78	242.17	176.54	212.6	201.11	203.85	379.95	352.44	314.61	319	390.76	368.11	413.34	392.25	385.3	340	396.8	346.47	373.98	396.81	303.93	356.97	353.7
20755	20755	Sprr2a1	19.37	0.17	0.34	0.16	33.58	13.96	5.07	18.52	0	0.18	0.09	0.32	0	5.67	11.65	0.05	0.96	1.78	1.34	82.44	4.62	6.77	32.58	7.26	0	111.78	2.39	1.4	0.22	11.95	30.15	0.29	0.53	0.27	51.18	22.33	8.76	29.16	0	0.3	0.15	0.48	0	8.88	17.56	0.08	1.45
103742	103742	Mien1	78.57	70.99	78.8	67.94	94.59	74.13	66.89	75.99	81.21	79.09	73.21	77.4	80.67	75.68	82.43	69.83	85.16	84.79	79.6	99.39	83.34	78.45	71.66	60.41	66.84	89.48	62.38	85.11	70.03	69.48	122.28	119.52	123.69	114.3	144.16	118.57	115.57	119.65	129.8	131.6	123.29	118.39	126.59	118.68	124.28	119	128.38
102635744	102635744	Gm28729	0.39	0.07	0.06	0.04	0.19	0.3	1	0.65	0.6	0.02	0.03	0.36	0.45	0.43	0.2	0.07	0.11	0.09	0.11	0.23	0.21	0.12	0.29	0.39	0.41	0.28	0.2	0.19	0.28	0.07	0.6	0.11	0.09	0.07	0.28	0.47	1.73	1.03	0.96	0.04	0.04	0.55	0.71	0.68	0.29	0.12	0.17
16848	16848	Lfng	11.51	10.32	11.49	14.3	7.92	10.83	10.86	11.09	7.69	18.29	26.36	9.12	13.95	9.19	8.16	10.08	9.82	12.58	9.93	18.52	16.05	12.37	11.04	20.51	14.05	12.58	13.59	18.93	13.37	13.52	17.91	17.37	18.04	24.06	12.08	17.33	18.76	17.46	12.29	30.44	44.4	13.95	21.89	14.41	12.31	17.18	14.81
66205	66205	Cd302	14.05	22.36	13.7	19.29	10.65	16.17	21.48	16.55	13.51	28.34	28.2	14.2	21.39	16.34	101.03	19.15	14.89	20.89	13.76	20.28	23.65	16.92	20.43	35.41	24.2	20.75	25.29	37.02	19.35	27.18	21.87	37.64	21.5	32.45	16.23	25.86	37.11	26.05	21.59	47.16	47.49	21.73	33.56	25.62	152.31	32.64	22.44
545824	545824	Zar1l	0	0	0	0	0	0	0	0	0	0.12	0	0	0	0.06	0	0	0	0	0	0	0	0	0	0	0	0	0	0	0	0	0	0	0	0	0	0	0	0	0	0.19	0	0	0	0.1	0	0	0
100855	100855	Tbc1d14	10.53	9.31	7.62	10.53	8.68	9.66	11.17	9.69	9.29	11.72	11.66	7.06	9.73	8.75	6.99	9.23	7.8	8.41	8.16	14.33	10.29	9.77	10.37	12.81	11.31	13.79	11.02	9.85	8.51	10.52	16.39	15.67	11.96	17.71	13.22	15.45	19.3	15.25	14.84	19.51	19.64	10.8	15.26	13.73	10.53	15.73	11.76
20454	20454	St3gal5	20.27	18.63	19.22	18.17	22.8	18.77	14.45	21.64	18.54	17.96	15.02	24.11	16.93	17.18	23.75	24.43	23.37	19.27	19.39	16.88	16.88	14.89	23.6	13.79	21.7	18.24	18.66	21.94	16.38	16.1	31.54	31.37	30.16	30.57	34.75	30.02	24.97	34.08	29.63	29.89	25.29	36.88	26.57	26.94	35.81	41.62	35.23
209011	209011	Sirt7	26.31	21.84	19.69	19.84	23.14	23.17	27.82	21.18	27.13	20.7	25.47	21.35	25.24	23.79	24.54	18.15	18.72	20.17	25.15	38.23	27.2	26.15	21.89	26.78	23.46	30.55	21.58	24.79	21.07	24.2	40.94	36.78	30.91	33.38	35.27	37.06	48.06	33.36	43.37	34.44	42.89	32.65	39.6	37.31	36.99	30.93	28.22
12408	12408	Cbr1	35.82	22	20.57	20.17	27.73	27.86	33.75	29.31	34.56	20.1	17.9	26.22	28.85	31.17	49.45	25.4	23	27.72	29.39	34.42	30.46	30.2	26.47	23	26.33	31.25	24.84	23.95	22.83	25.05	55.74	37.03	32.29	33.93	42.26	44.56	58.32	46.15	55.24	33.44	30.14	40.1	45.27	48.87	74.55	43.29	34.67
23918	23918	Impdh2	60.72	49.32	44.25	44.62	51.19	49.33	53.3	53.79	43.39	54.25	66.49	41.67	58.88	59.55	43.93	61.52	42.16	41.11	43.21	56	46.63	58.32	78.78	48.37	50.47	53.9	51.66	58.36	47.17	58.18	94.5	83.03	69.46	75.06	78.02	78.9	92.08	84.7	69.35	90.27	111.97	63.74	92.39	93.38	66.22	104.85	63.56
59031	59031	Chst12	26.54	33.47	28.58	37.04	19.89	30.14	58.53	25.09	47.66	38.68	41.79	21.01	33.1	25.52	22.62	22.27	23.05	42.11	20.8	36.55	34.96	30.35	32.87	40.85	27.97	36.25	29.76	33.65	49.37	33.14	41.3	56.35	44.85	62.31	30.32	48.21	101.12	39.5	76.18	64.37	70.38	32.14	51.94	40.02	34.1	37.95	34.75
269252	269252	Gtf3c4	6.9	5.86	5.56	5.64	5.41	6.25	6.31	6.21	5.34	6.01	6.2	4.73	6.1	5.83	4.88	7.73	5.22	5.09	6.32	8.89	5.64	7.04	6.77	6.88	6.98	8.07	6.93	5.12	5.71	6.44	10.73	9.87	8.73	9.49	8.25	10	10.91	9.77	8.53	9.99	10.44	7.24	9.58	9.14	7.36	13.18	7.87
80289	80289	Lysmd3	3.52	5.83	4.61	5.6	3.55	4.28	7.41	5.1	6.13	5.24	5.14	3.57	4.91	5.6	4.9	4.83	4.89	4.86	5.2	6.34	5.82	5.37	5.3	6.71	5.75	5.67	5.7	4.8	5.94	6.12	5.48	9.81	7.24	9.43	5.41	6.84	12.8	8.03	9.79	8.72	8.66	5.46	7.71	8.78	7.39	8.23	7.37
433801	433801	Gm13212	2.4	2.14	1.75	2.08	1.46	1.71	3.06	2.77	1.48	1.87	2.87	2.08	2.68	2.97	2	2.07	2.18	2.11	2.26	3.45	3.72	2.47	3.22	4.33	3.56	3.49	2.77	2.6	2.24	2.48	3.73	3.6	2.75	3.51	2.22	2.74	5.29	4.36	2.37	3.12	4.83	3.18	4.21	4.66	3.02	3.52	3.28
218314	218314	Zfp595	1.37	1.58	0.99	1.27	0.88	1.29	1.6	1.09	1.2	1.24	1.43	0.84	1.34	1.51	1.11	1.04	0.83	0.95	1.24	1.52	1.66	1.22	1.74	1.66	1.37	1.81	1.37	1.08	1.2	1.58	2.14	2.65	1.56	2.14	1.34	2.07	2.76	1.72	1.92	2.06	2.41	1.28	2.1	2.36	1.68	1.77	1.24
278240	278240	Spin2c	2.05	1.7	0.54	0.8	0.75	1.97	3.16	1.96	1.84	0.97	1.6	1.04	1.99	1.93	1.96	0.97	1.48	1.97	1.31	2.35	1.62	2.01	1.82	1.19	1.47	1.78	1.01	1.35	1.47	1.26	3.18	2.87	0.85	1.34	1.14	3.14	5.46	3.08	2.94	1.61	2.69	1.59	3.12	3.03	2.96	1.65	2.23
208092	208092	Chmp6	29.82	28.32	26.77	27.98	28.06	26.31	27.07	29.73	25.87	30.69	32.96	24.89	27.79	28.6	23.85	29.16	25.11	28.58	27.07	31	29.15	31.16	30.77	27.56	27.68	26.82	28.91	32.44	26.8	28.46	46.4	47.68	42.03	47.06	42.77	42.08	46.77	46.82	41.35	51.07	55.51	38.07	43.61	44.85	35.96	49.69	37.85
98956	98956	Nat10	12.03	9.99	8.9	9.99	10.25	9.73	15.17	10.14	13.43	10.05	11.88	9.96	11.27	11.73	10.01	14.21	9.3	8.48	10.96	13.3	10.47	13.69	14.49	10.95	11.09	11.17	11.8	11.01	11.18	10.99	18.72	16.82	13.97	16.8	15.61	15.56	26.21	15.97	21.47	16.73	20	15.23	17.68	18.39	15.09	24.22	14.01
52639	52639	Wipi1	30.63	57.12	35.85	44.76	45	35.51	27.27	32.98	27.28	38.43	38.83	35.02	30	26.66	24.74	46.49	38.09	30.02	29.12	32.81	33.3	39.1	37.32	34.02	37.94	47.31	36.03	41.98	36.65	44.1	47.66	96.17	56.27	75.3	68.59	56.8	47.12	51.93	43.6	63.94	65.39	53.56	47.07	41.8	37.3	79.22	57.43
12325	12325	Camk2g	33.82	33.8	33.57	30.28	30.77	31.84	40.77	35.59	35.6	23.75	23.05	33.59	30.85	36.69	23.16	30.8	30.01	30.78	31.88	17.11	27.16	27.84	36.18	28.92	36.3	18.88	34.42	32.6	36.72	30.18	52.63	56.9	52.69	50.93	46.9	50.92	70.44	56.03	56.9	39.52	38.83	51.37	48.4	57.53	34.92	52.49	45.24
12518	12518	Cd79a	10.25	1.12	0.61	0.73	1.32	7.44	0.89	0.75	1.6	3.25	2.27	2.68	1	0.53	1.44	0.32	5.1	0.8	0.64	0.46	1.34	1.35	1.55	2.64	3.02	1.01	1.54	2.7	0.65	5.62	15.95	1.89	0.96	1.24	2	11.9	1.55	1.17	2.55	5.41	3.82	4.1	1.56	0.83	2.17	0.54	7.68
213945	213945	Col28a1	0.29	1.01	0.78	0.71	0.55	0.6	1.19	0.51	1.22	0.88	0.62	0.53	0.5	0.38	0.57	0.88	0.56	0.96	0.43	0.16	0.62	0.52	0.77	1.13	0.46	0.44	0.85	0.92	0.71	0.78	0.45	1.7	1.23	1.2	0.84	0.96	2.05	0.81	1.95	1.46	1.05	0.8	0.79	0.59	0.87	1.5	0.85
329251	329251	Ppp1r12b	38.67	20.29	29.44	26.65	38.69	42.09	125.19	36.43	127.09	23.23	18.62	36.83	42.38	45.33	36.73	31.97	37.42	46.19	30.45	21.52	26.31	30.15	54.34	37.24	46.14	35.16	38.58	24.5	54.19	22.49	60.17	34.16	46.22	44.83	58.96	67.33	216.3	57.36	203.14	38.65	31.36	56.34	66.5	71.07	55.38	54.49	56.41
67097	67097	Rps10	1312.46	990.81	928.77	931.77	1129.87	1074.63	1197.65	1231.09	1206.45	1072.46	1200.74	947.97	1171.4	1198.22	957.84	993.25	1031.16	1106.89	1154.35	1423.05	1274.96	1326.04	1271.86	981.31	992.78	1225.96	900.61	1159.11	983.6	1094.76	2042.54	1668.04	1457.86	1567.48	1722.04	1718.88	2069.28	1938.42	1928.32	1784.54	2022.15	1449.94	1838.19	1878.88	1444.02	1692.64	1554.53
[truncated: 17,619 more rows]
[truncated: 117 more columns]

## Sheet: Sample ID
Sample ID	Genotype	Tissue type	EM tissue state	RNA Concentration (ng/uL)	260/280
CA-1	CNR1 k/o	EM Lesions	UnD (Undecidualized)	343.3	2.07
[truncated: 29 more rows]
